# Supplementary material for: Comprehensive Succinylome Profiling Reveals the Pivotal Role of Lysine Succinylation in Energy Metabolism and Quorum Sensing of Staphylococcus epidermidis
Source: Front Microbiol. 2021 Feb 1;11:632367. doi: 10.3389/fmicb.2020.632367 (PMC7882547; doi:10.3389/fmicb.2020.632367)
Supplement: Supplementary file 4 [file Table_4.XLSX]

## Sheet: GO ident
GO Terms Level 1	GO Terms Description	GO Terms Level	GO Terms ID	Mapping	Background	All Mapping	All Background	Fold Enrichment	Fisher' exact test P value	-log10(p value)	Related Protein
Cellular Component	cytosolic ribosome	6	GO:0022626	49	51	257	540	2.02	4.87919e-15	14.31	P66175 Q8CS87 Q8CRG4 Q8CRH5 Q8CST2 Q8CRG5 Q8CRG7 Q8CRG0 Q8CRJ0 Q8CS77 Q8CRG8 Q8CRH1 Q8CRM8 P66255 Q8CRH8 Q8CSZ2 Q8CRI2 Q8CSE3 Q8CTF2 Q8CRG6 Q8CQU8 Q8CRI3 P66523 P66336 Q8CRH7 Q8CRI5 Q8CSV0 Q8CSC6 Q8CRH2 Q8CSP9 Q8CTT2 Q8CTT5 Q8CRG2 P66618 Q8CSU2 Q8CRG9 Q8CRH4 Q8CSU9 Q8CRH6 Q8CQP4 Q8CQP6 Q8CS89 Q8CS76 Q8CRI9 Q8CRG1 Q8CRG3 Q8CTT4 Q8CU90 Q8CRH9
	ribosome	5	GO:0005840	51	54	257	540	1.98	1.00119e-14	14	P66175 Q8CS87 Q8CRG4 Q8CRH5 Q8CST2 Q8CRG5 Q8CRG7 Q8CRG0 Q8CRJ0 Q8CS77 Q8CRG8 Q8CRH1 Q8CRM8 P66255 Q8CRH8 Q8CSZ2 Q8CRI2 Q8CSE3 Q8CTF2 Q8CRG6 Q8CQU8 Q8CRI3 P66523 P66336 Q8CRH7 Q8CRI5 Q8CSV0 Q8CSC6 Q8CRH2 Q8CSP9 Q8CS54 Q8CTT2 Q8CTT5 Q8CRG2 P66618 Q8CSU2 Q8CRG9 Q8CRH4 Q8CSU9 Q8CRH6 Q8CTS8 Q8CQP4 Q8CQP6 Q8CS89 Q8CS76 Q8CRI9 Q8CRG1 Q8CRG3 Q8CTT4 Q8CU90 Q8CRH9
	ribosomal subunit	3	GO:0044391	50	53	257	540	1.98	2.22693e-14	13.65	P66175 Q8CS87 Q8CRG4 Q8CRH5 Q8CST2 Q8CRG5 Q8CRG7 Q8CRG0 Q8CRJ0 Q8CS77 Q8CRG8 Q8CRH1 Q8CRM8 P66255 Q8CRH8 Q8CSZ2 Q8CRI2 Q8CSE3 Q8CTF2 Q8CRG6 Q8CQU8 Q8CRI3 P66523 P66336 Q8CRH7 Q8CRI5 Q8CSV0 Q8CSC6 Q8CRH2 Q8CSP9 Q8CS54 Q8CTT2 Q8CTT5 Q8CRG2 P66618 Q8CSU2 Q8CRG9 Q8CRH4 Q8CSU9 Q8CRH6 Q8CQP4 Q8CQP6 Q8CS89 Q8CS76 Q8CRI9 Q8CRG1 Q8CRG3 Q8CTT4 Q8CU90 Q8CRH9
	ribonucleoprotein complex	2	GO:1990904	52	57	257	540	1.92	2.45199e-13	12.61	P66175 Q8CS87 Q8CRG4 Q8CRH5 Q8CST2 Q8CRG5 Q8CRG7 Q8CRG0 Q8CRJ0 Q8CS77 Q8CRG8 Q8CRH1 Q8CRM8 P66255 Q8CS75 Q8CRH8 Q8CSZ2 Q8CRI2 Q8CSE3 Q8CTF2 Q8CRG6 Q8CQU8 Q8CRI3 P66523 P66336 Q8CRH7 Q8CRI5 Q8CSV0 Q8CSC6 Q8CRH2 Q8CSP9 Q8CS54 Q8CTT2 Q8CTT5 Q8CRG2 P66618 Q8CSU2 Q8CRG9 Q8CRH4 Q8CSU9 Q8CRH6 Q8CTS8 Q8CQP4 Q8CQP6 Q8CS89 Q8CS76 Q8CRI9 Q8CRG1 Q8CRG3 Q8CTT4 Q8CU90 Q8CRH9
	intracellular non-membrane-bounded organelle	4	GO:0043232	54	62	257	540	1.83	7.11765e-12	11.15	P66175 Q8CS87 Q8CRG4 Q8CRH5 Q8CST2 Q8CRG5 Q8CRG7 A0A0H2VGE6 Q8CRG0 Q8CRJ0 Q8CS77 Q8CRG8 Q8CRP6 Q8CRH1 Q8CRM8 P66255 Q8CRH8 Q8CSZ2 Q8CRI2 Q8CSE3 Q8CTF2 Q8CRG6 Q8CQU8 Q8CRI3 P66523 P66336 Q8CRH7 Q8CRI5 Q8CSV0 Q8CSC6 Q8CRH2 Q8CSP9 Q8CS54 Q8CTT2 Q8CTT5 Q8CRG2 P66618 Q8CSU2 Q8CRG9 Q8CRH4 Q8CSU9 Q8CRH6 Q8CTS8 Q8CQP4 Q8CQP6 Q8CS89 Q8CS76 Q8CRI9 Q8CRG1 Q8CRG3 Q8CTT4 A0A0H2VKZ1 Q8CU90 Q8CRH9
	cytosolic large ribosomal subunit	5	GO:0022625	32	32	257	540	2.1	1.63484e-11	10.79	P66175 Q8CS87 Q8CRH5 Q8CRG5 Q8CRG7 Q8CRG0 Q8CS77 Q8CRH1 Q8CRM8 P66255 Q8CRH8 Q8CSZ2 Q8CRI2 Q8CSE3 Q8CQU8 Q8CRI5 Q8CRH2 Q8CSP9 Q8CTT2 Q8CTT5 Q8CRG2 Q8CRG9 Q8CSU9 Q8CRH6 Q8CS89 Q8CS76 Q8CRI9 Q8CRG1 Q8CRG3 Q8CTT4 Q8CU90 Q8CRH9
	large ribosomal subunit	4	GO:0015934	32	32	257	540	2.1	1.63484e-11	10.79	P66175 Q8CS87 Q8CRH5 Q8CRG5 Q8CRG7 Q8CRG0 Q8CS77 Q8CRH1 Q8CRM8 P66255 Q8CRH8 Q8CSZ2 Q8CRI2 Q8CSE3 Q8CQU8 Q8CRI5 Q8CRH2 Q8CSP9 Q8CTT2 Q8CTT5 Q8CRG2 Q8CRG9 Q8CSU9 Q8CRH6 Q8CS89 Q8CS76 Q8CRI9 Q8CRG1 Q8CRG3 Q8CTT4 Q8CU90 Q8CRH9
	non-membrane-bounded organelle	3	GO:0043228	54	63	257	540	1.8	2.91031e-11	10.54	P66175 Q8CS87 Q8CRG4 Q8CRH5 Q8CST2 Q8CRG5 Q8CRG7 A0A0H2VGE6 Q8CRG0 Q8CRJ0 Q8CS77 Q8CRG8 Q8CRP6 Q8CRH1 Q8CRM8 P66255 Q8CRH8 Q8CSZ2 Q8CRI2 Q8CSE3 Q8CTF2 Q8CRG6 Q8CQU8 Q8CRI3 P66523 P66336 Q8CRH7 Q8CRI5 Q8CSV0 Q8CSC6 Q8CRH2 Q8CSP9 Q8CS54 Q8CTT2 Q8CTT5 Q8CRG2 P66618 Q8CSU2 Q8CRG9 Q8CRH4 Q8CSU9 Q8CRH6 Q8CTS8 Q8CQP4 Q8CQP6 Q8CS89 Q8CS76 Q8CRI9 Q8CRG1 Q8CRG3 Q8CTT4 A0A0H2VKZ1 Q8CU90 Q8CRH9
Molecular Function	structural constituent of ribosome	2	GO:0003735	50	53	267	591	2.09	1.82602e-15	14.74	P66175 Q8CS87 Q8CRG4 Q8CRH5 Q8CST2 Q8CRG5 Q8CRG7 Q8CRG0 Q8CRJ0 Q8CS77 Q8CRG8 Q8CRH1 Q8CRM8 P66255 Q8CRH8 Q8CSZ2 Q8CRI2 Q8CSE3 Q8CSV6 Q8CRG6 Q8CRI3 P66523 P66336 Q8CRH7 Q8CRI5 Q8CSV0 Q8CSC6 Q8CRH2 Q8CSP9 Q8CS54 Q8CTT2 Q8CTT5 Q8CRG2 P66618 Q8CSU2 Q8CRG9 Q8CRH4 Q8CSU9 Q8CRH6 Q8CTS8 Q8CQP4 Q8CQP6 Q8CS89 Q8CS76 Q8CRI9 Q8CRG1 Q8CRG3 Q8CTT4 Q8CU90 Q8CRH9
	RNA binding	4	GO:0003723	33	40	267	591	1.83	6.12256e-07	6.21	Q8CP34 Q8CQ82 Q8CRH5 Q8CST2 Q8CRG7 Q8CPR1 A0A0H2VGE6 Q8CSU0 Q8CPG8 Q8CRJ0 Q8CS77 Q8CRP6 Q8CS75 Q8CNW7 Q8CST1 Q8CQU8 Q8CSC6 Q8CRH2 Q8CTT5 Q8CS54 Q8CRG2 P66618 Q8CPC2 Q8CRG9 Q8CSU9 Q8CRH4 Q8CRH6 Q8CQP4 Q8CRG1 Q8CRI9 Q8CRG3 Q8CTT4 Q8CU90
	nucleic acid binding	3	GO:0003676	52	73	267	591	1.58	1.4622e-06	5.83	Q8CSX8 Q8CP34 A0A0H2VGC3 Q8CNQ7 Q8CPL6 Q8CQ82 Q8CRH5 Q8CST2 Q8CRG7 Q8CPR1 A0A0H2VGE6 Q8CSU0 Q8CPG8 Q8CRJ0 Q8CS77 Q8CPF0 P0C0P4 Q8CRP6 Q8CS75 A0A0H2VGP0 Q8CNW7 Q8CST1 Q8CQU8 A0A0H2VJ10 Q8CNV8 Q8CP24 P0C0Q6 Q8CSV0 Q8CSC6 Q8CRH2 Q8CP40 Q8CPE9 Q8CTT5 Q8CS54 Q8CRG2 P66618 Q8CPC2 Q8CQK7 Q8CRG9 Q8CSU9 Q8CRH4 A0A0H2VHH8 Q8CRH6 A0A0H2VHV0 Q8CQP4 Q8CRI9 Q8CS73 Q8CRG1 Q8CPG9 Q8CRG3 Q8CTT4 Q8CU90
	rRNA binding	5	GO:0019843	17	18	267	591	2.09	1.08095e-05	4.97	Q8CRH5 Q8CSC6 Q8CST2 Q8CRH2 Q8CS54 Q8CRG7 Q8CTT5 P66618 Q8CRG9 Q8CRH4 Q8CSU9 Q8CS77 Q8CRH6 Q8CQP4 Q8CRI9 Q8CQU8 Q8CU90
	ligase activity, forming carbon-oxygen bonds	3	GO:0016875	13	16	267	591	1.8	0.00323408	2.49	Q8CS48 Q8CTU1 Q8CSY8 Q8CTN9 Q8CS83 Q8CT69 Q8CS74 Q8CSA7 Q8CSX1 Q8CSD5 Q8CNU8 Q8CQU3 Q8CU95
	aminoacyl-tRNA ligase activity	4	GO:0004812	13	16	267	591	1.8	0.00323408	2.49	Q8CS48 Q8CTU1 Q8CSY8 Q8CTN9 Q8CS83 Q8CT69 Q8CS74 Q8CSA7 Q8CSX1 Q8CSD5 Q8CNU8 Q8CQU3 Q8CU95
	large ribosomal subunit rRNA binding	6	GO:0070180	6	6	267	591	2.21	0.00824199	2.08	Q8CRI9 Q8CRH5 Q8CRG9 Q8CU90 Q8CSU9 Q8CS77
	polysaccharide binding	3	GO:0030247	7	8	267	591	1.94	0.0179578	1.75	Q8CTU1 Q8CTU3 Q8CPY5 Q8CPG8 P0C0N7 Q8CTD6 Q8CP17
Biological Process	ribonucleoprotein complex assembly	6	GO:0022618	35	39	285	635	2	2.00638e-09	8.7	P66175 Q8CRG4 Q8CRH5 Q8CST2 Q8CRG5 Q8CRG7 Q8CRG0 Q8CS77 Q8CRH1 Q8CS75 Q8CRH8 Q8CSZ2 Q8CSE3 Q8CRG6 P66523 Q8CRH7 Q8CRI5 Q8CSV0 Q8CSC6 A0A0H2VHE0 Q8CRH2 Q8CSP9 Q8CTT5 Q8CST6 Q8CRG2 P66618 A0A0H2VGI5 Q8CSU2 Q8CSU9 Q8CRH4 A0A0H2VFY6 Q8CS89 Q8CRG1 Q8CRG3 Q8CTT4
	cellular protein-containing complex assembly	6	GO:0034622	37	42	285	635	1.96	2.15443e-09	8.67	P66175 Q8CRG4 Q8CRH5 Q8CST2 Q8CRG5 Q8CRG7 Q8CRG0 Q8CS77 Q8CRH1 Q8CS75 Q8CRH8 Q8CSZ2 Q8CNW5 Q8CSE3 Q8CRG6 P66523 Q8CRH7 A0A0H2VHX6 Q8CRI5 Q8CSV0 Q8CSC6 A0A0H2VHE0 Q8CRH2 Q8CSP9 Q8CTT5 Q8CST6 Q8CRG2 P66618 A0A0H2VGI5 Q8CSU2 Q8CSU9 Q8CRH4 A0A0H2VFY6 Q8CS89 Q8CRG1 Q8CRG3 Q8CTT4
	ribosome assembly	6	GO:0042255	34	38	285	635	1.99	4.29429e-09	8.37	P66175 Q8CRG4 Q8CRH5 Q8CST2 Q8CRG5 Q8CRG7 Q8CRG0 Q8CS77 Q8CRH1 Q8CRH8 Q8CSZ2 Q8CSE3 Q8CRG6 P66523 Q8CRH7 Q8CRI5 Q8CSV0 Q8CSC6 Q8CRH2 Q8CSP9 A0A0H2VHE0 Q8CTT5 Q8CST6 Q8CRG2 P66618 A0A0H2VGI5 Q8CSU2 Q8CSU9 Q8CRH4 A0A0H2VFY6 Q8CS89 Q8CRG1 Q8CRG3 Q8CTT4
	ribosomal large subunit assembly	7	GO:0000027	21	22	285	635	2.13	4.20422e-07	6.38	P66175 Q8CRI5 Q8CRH5 A0A0H2VHE0 Q8CSP9 Q8CRH2 Q8CRG7 Q8CTT5 Q8CRG2 A0A0H2VGI5 Q8CRG0 Q8CSU9 Q8CS77 A0A0H2VFY6 Q8CRH1 Q8CRH8 Q8CSZ2 Q8CS89 Q8CSE3 Q8CRG3 Q8CTT4
	posttranscriptional regulation of gene expression	6	GO:0010608	11	11	285	635	2.23	0.000133582	3.87	A0A0H2VGQ3 Q8CS75 Q8CS54 Q8CTT2 Q8CTF2 Q8CRG1 Q8CRI9 P66618 Q8CTT4 Q8CS77 Q8CRH4
	regulation of translation	6	GO:0006417	10	10	285	635	2.23	0.000303595	3.52	A0A0H2VGQ3 Q8CS75 Q8CS54 Q8CTT2 Q8CRG1 Q8CRI9 P66618 Q8CTF2 Q8CTT4 Q8CS77
	negative regulation of gene expression	6	GO:0010629	19	24	285	635	1.76	0.000529706	3.28	A0A0H2VJP0 Q8CSX8 A0A0H2VIU8 A0A0H2VGC3 Q8CNV8 Q8CNQ7 Q8CTT2 P66618 Q8CS77 A0A0H2VGQ3 P0C0P4 Q8CRI9 Q8CRG1 Q8CS73 Q8CTF2 Q8CST1 Q8CPG9 Q8CTT4 A0A0H2VG65
	nucleotide catabolic process	6	GO:0009166	9	9	285	635	2.23	0.000688589	3.16	Q8CTD5 Q8CN61 A0A0H2VF26 P0C0M5 Q8CTD6 A0A0H2VID5 Q8CS69 Q8CNH7 Q8CPY4
	negative regulation of translation	7	GO:0017148	8	8	285	635	2.23	0.00155865	2.81	A0A0H2VGQ3 Q8CTF2 P66618 Q8CRI9 Q8CRG1 Q8CTT4 Q8CS77 Q8CTT2
	negative regulation of protein metabolic process	6	GO:0051248	8	8	285	635	2.23	0.00155865	2.81	A0A0H2VGQ3 Q8CTF2 P66618 Q8CRI9 Q8CRG1 Q8CTT4 Q8CS77 Q8CTT2
	tRNA aminoacylation for protein translation	6	GO:0006418	14	17	285	635	1.83	0.00159703	2.8	Q8CS48 Q8CTU1 Q8CSY8 Q8CTN9 Q8CS83 A0A0H2VJ45 Q8CT69 Q8CS74 Q8CSA7 Q8CSX1 Q8CSD5 Q8CNU8 Q8CQU3 Q8CU95
	ribonucleoside diphosphate metabolic process	6	GO:0009185	7	7	285	635	2.23	0.00352098	2.45	P0C0M9 Q8CTD5 Q8CSU1 Q8CN61 Q8CS69 Q8CPY4 Q8CTD6
	ribosomal small subunit assembly	7	GO:0000028	12	15	285	635	1.78	0.00566782	2.25	Q8CRG4 Q8CSV0 Q8CSC6 Q8CST2 Q8CST6 P66618 Q8CRG6 A0A0H2VGI5 Q8CSU2 P66523 Q8CRH7 Q8CRH4
	nucleoside diphosphate phosphorylation	6	GO:0006165	6	6	285	635	2.23	0.00793797	2.1	Q8CTD5 Q8CN61 Q8CSI0 Q8CS69 Q8CPY4 Q8CTD6

## Sheet: ident GO2Protein
GO Terms Level 1	GO Terms ID	GO Terms Level	GO Terms Description	Fisher's exact test P value	Protein accession	Position	Amino acid	Protein names	Gene names
Cellular Component	GO:0015935	4	small ribosomal subunit	0.000274651	Q8CRG4	81	K	30S ribosomal protein S19	rpsS
Cellular Component	GO:0015935	4	small ribosomal subunit	0.000274651	Q8CRG4	27	K	30S ribosomal protein S19	rpsS
Cellular Component	GO:0015935	4	small ribosomal subunit	0.000274651	Q8CRG4	88	K	30S ribosomal protein S19	rpsS
Cellular Component	GO:0015935	4	small ribosomal subunit	0.000274651	Q8CRG4	18	K	30S ribosomal protein S19	rpsS
Cellular Component	GO:0015935	4	small ribosomal subunit	0.000274651	Q8CRG4	56	K	30S ribosomal protein S19	rpsS
Cellular Component	GO:0015935	4	small ribosomal subunit	0.000274651	Q8CRG4	7	K	30S ribosomal protein S19	rpsS
Cellular Component	GO:0015935	4	small ribosomal subunit	0.000274651	Q8CRG4	17	K	30S ribosomal protein S19	rpsS
Cellular Component	GO:0015935	4	small ribosomal subunit	0.000274651	Q8CSV0	88	K	30S ribosomal protein S16	rpsP
Cellular Component	GO:0015935	4	small ribosomal subunit	0.000274651	Q8CSV0	66	K	30S ribosomal protein S16	rpsP
Cellular Component	GO:0015935	4	small ribosomal subunit	0.000274651	Q8CSC6	70	K	30S ribosomal protein S20	rpsT
Cellular Component	GO:0015935	4	small ribosomal subunit	0.000274651	Q8CSC6	46	K	30S ribosomal protein S20	rpsT
Cellular Component	GO:0015935	4	small ribosomal subunit	0.000274651	Q8CSC6	55	K	30S ribosomal protein S20	rpsT
Cellular Component	GO:0015935	4	small ribosomal subunit	0.000274651	Q8CST2	13	K	30S ribosomal protein S15	rpsO
Cellular Component	GO:0015935	4	small ribosomal subunit	0.000274651	Q8CS54	28	K	30S ribosomal protein S4	rpsD
Cellular Component	GO:0015935	4	small ribosomal subunit	0.000274651	Q8CS54	134	K	30S ribosomal protein S4	rpsD
Cellular Component	GO:0015935	4	small ribosomal subunit	0.000274651	Q8CS54	144	K	30S ribosomal protein S4	rpsD
Cellular Component	GO:0015935	4	small ribosomal subunit	0.000274651	P66618	35	K	30S ribosomal protein S7	rpsG
Cellular Component	GO:0015935	4	small ribosomal subunit	0.000274651	P66618	25	K	30S ribosomal protein S7	rpsG
Cellular Component	GO:0015935	4	small ribosomal subunit	0.000274651	Q8CSU2	81	K	30S ribosomal protein S2	rpsB
Cellular Component	GO:0015935	4	small ribosomal subunit	0.000274651	Q8CSU2	74	K	30S ribosomal protein S2	rpsB
Cellular Component	GO:0015935	4	small ribosomal subunit	0.000274651	Q8CSU2	49	K	30S ribosomal protein S2	rpsB
Cellular Component	GO:0015935	4	small ribosomal subunit	0.000274651	Q8CSU2	138	K	30S ribosomal protein S2	rpsB
Cellular Component	GO:0015935	4	small ribosomal subunit	0.000274651	Q8CSU2	132	K	30S ribosomal protein S2	rpsB
Cellular Component	GO:0015935	4	small ribosomal subunit	0.000274651	Q8CSU2	73	K	30S ribosomal protein S2	rpsB
Cellular Component	GO:0015935	4	small ribosomal subunit	0.000274651	Q8CSU2	29	K	30S ribosomal protein S2	rpsB
Cellular Component	GO:0015935	4	small ribosomal subunit	0.000274651	Q8CRJ0	7	K	30S ribosomal protein S9	rpsI
Cellular Component	GO:0015935	4	small ribosomal subunit	0.000274651	Q8CRH4	33	K	30S ribosomal protein S8	rpsH
Cellular Component	GO:0015935	4	small ribosomal subunit	0.000274651	Q8CRH4	90	K	30S ribosomal protein S8	rpsH
Cellular Component	GO:0015935	4	small ribosomal subunit	0.000274651	Q8CRH4	78	K	30S ribosomal protein S8	rpsH
Cellular Component	GO:0015935	4	small ribosomal subunit	0.000274651	Q8CRH4	41	K	30S ribosomal protein S8	rpsH
Cellular Component	GO:0015935	4	small ribosomal subunit	0.000274651	Q8CRH4	34	K	30S ribosomal protein S8	rpsH
Cellular Component	GO:0015935	4	small ribosomal subunit	0.000274651	Q8CRH4	56	K	30S ribosomal protein S8	rpsH
Cellular Component	GO:0015935	4	small ribosomal subunit	0.000274651	Q8CRH4	24	K	30S ribosomal protein S8	rpsH
Cellular Component	GO:0015935	4	small ribosomal subunit	0.000274651	Q8CRH4	65	K	30S ribosomal protein S8	rpsH
Cellular Component	GO:0015935	4	small ribosomal subunit	0.000274651	Q8CRH4	82	K	30S ribosomal protein S8	rpsH
Cellular Component	GO:0015935	4	small ribosomal subunit	0.000274651	Q8CRG8	18	K	30S ribosomal protein S17	rpsQ
Cellular Component	GO:0015935	4	small ribosomal subunit	0.000274651	Q8CRG8	73	K	30S ribosomal protein S17	rpsQ
Cellular Component	GO:0015935	4	small ribosomal subunit	0.000274651	Q8CRG8	47	K	30S ribosomal protein S17	rpsQ
Cellular Component	GO:0015935	4	small ribosomal subunit	0.000274651	Q8CQP4	19	K	30S ribosomal protein S6	rpsF
Cellular Component	GO:0015935	4	small ribosomal subunit	0.000274651	Q8CQP6	35	K	30S ribosomal protein S18	rpsR
Cellular Component	GO:0015935	4	small ribosomal subunit	0.000274651	Q8CQP6	77	K	30S ribosomal protein S18	rpsR
Cellular Component	GO:0015935	4	small ribosomal subunit	0.000274651	Q8CQP6	65	K	30S ribosomal protein S18	rpsR
Cellular Component	GO:0015935	4	small ribosomal subunit	0.000274651	Q8CQP6	55	K	30S ribosomal protein S18	rpsR
Cellular Component	GO:0015935	4	small ribosomal subunit	0.000274651	Q8CTF2	61	K	Ribosome hibernation promotion factor	hpf
Cellular Component	GO:0015935	4	small ribosomal subunit	0.000274651	Q8CRG6	134	K	30S ribosomal protein S3	rpsC
Cellular Component	GO:0015935	4	small ribosomal subunit	0.000274651	Q8CRG6	40	K	30S ribosomal protein S3	rpsC
Cellular Component	GO:0015935	4	small ribosomal subunit	0.000274651	Q8CRG6	97	K	30S ribosomal protein S3	rpsC
Cellular Component	GO:0015935	4	small ribosomal subunit	0.000274651	Q8CRG6	26	K	30S ribosomal protein S3	rpsC
Cellular Component	GO:0015935	4	small ribosomal subunit	0.000274651	Q8CRG6	107	K	30S ribosomal protein S3	rpsC
Cellular Component	GO:0015935	4	small ribosomal subunit	0.000274651	Q8CRG6	47	K	30S ribosomal protein S3	rpsC
Cellular Component	GO:0015935	4	small ribosomal subunit	0.000274651	Q8CRG6	106	K	30S ribosomal protein S3	rpsC
Cellular Component	GO:0015935	4	small ribosomal subunit	0.000274651	Q8CRG6	89	K	30S ribosomal protein S3	rpsC
Cellular Component	GO:0015935	4	small ribosomal subunit	0.000274651	Q8CRG6	96	K	30S ribosomal protein S3	rpsC
Cellular Component	GO:0015935	4	small ribosomal subunit	0.000274651	P66523	8	K	30S ribosomal protein S21	rpsU
Cellular Component	GO:0015935	4	small ribosomal subunit	0.000274651	P66523	40	K	30S ribosomal protein S21	rpsU
Cellular Component	GO:0015935	4	small ribosomal subunit	0.000274651	Q8CRI3	64	K	30S ribosomal protein S13	rpsM
Cellular Component	GO:0015935	4	small ribosomal subunit	0.000274651	Q8CRI3	46	K	30S ribosomal protein S13	rpsM
Cellular Component	GO:0015935	4	small ribosomal subunit	0.000274651	Q8CRI3	78	K	30S ribosomal protein S13	rpsM
Cellular Component	GO:0015935	4	small ribosomal subunit	0.000274651	P66336	11	K	30S ribosomal protein S10	rpsJ
Cellular Component	GO:0015935	4	small ribosomal subunit	0.000274651	P66336	57	K	30S ribosomal protein S10	rpsJ
Cellular Component	GO:0015935	4	small ribosomal subunit	0.000274651	P66336	30	K	30S ribosomal protein S10	rpsJ
Cellular Component	GO:0015935	4	small ribosomal subunit	0.000274651	P66336	24	K	30S ribosomal protein S10	rpsJ
Cellular Component	GO:0015935	4	small ribosomal subunit	0.000274651	Q8CRH7	159	K	30S ribosomal protein S5	rpsE
Cellular Component	GO:0015935	4	small ribosomal subunit	0.000274651	Q8CRH7	69	K	30S ribosomal protein S5	rpsE
Cellular Component	GO:0015935	4	small ribosomal subunit	0.000274651	Q8CRH7	97	K	30S ribosomal protein S5	rpsE
Cellular Component	GO:0015935	4	small ribosomal subunit	0.000274651	Q8CRH7	61	K	30S ribosomal protein S5	rpsE
Cellular Component	GO:0015935	4	small ribosomal subunit	0.000274651	Q8CRH7	9	K	30S ribosomal protein S5	rpsE
Cellular Component	GO:0009898	4	cytoplasmic side of plasma membrane	0.0249793	Q8CQ96	196	K	Probable malate:quinone oxidoreductase 2	mqo2
Cellular Component	GO:0009898	4	cytoplasmic side of plasma membrane	0.0249793	A0A0H2VJ83	70	K	Nitrate reductase beta chain narH	SE_1974
Cellular Component	GO:0009898	4	cytoplasmic side of plasma membrane	0.0249793	A0A0H2VJ83	290	K	Nitrate reductase beta chain narH	SE_1974
Cellular Component	GO:0009898	4	cytoplasmic side of plasma membrane	0.0249793	A0A0H2VHP1	1070	K	Respiratory nitrate reductase alpha chain	SE_1975
Cellular Component	GO:0009898	4	cytoplasmic side of plasma membrane	0.0249793	A0A0H2VHP1	10	K	Respiratory nitrate reductase alpha chain	SE_1975
Cellular Component	GO:0009898	4	cytoplasmic side of plasma membrane	0.0249793	A0A0H2VHP1	107	K	Respiratory nitrate reductase alpha chain	SE_1975
Cellular Component	GO:0009898	4	cytoplasmic side of plasma membrane	0.0249793	Q8CMY4	189	K	Probable malate:quinone oxidoreductase 4	mqo4
Cellular Component	GO:0009898	4	cytoplasmic side of plasma membrane	0.0249793	Q8CMY4	155	K	Probable malate:quinone oxidoreductase 4	mqo4
Cellular Component	GO:0009898	4	cytoplasmic side of plasma membrane	0.0249793	Q8CMY4	455	K	Probable malate:quinone oxidoreductase 4	mqo4
Cellular Component	GO:0009898	4	cytoplasmic side of plasma membrane	0.0249793	Q8CMY4	167	K	Probable malate:quinone oxidoreductase 4	mqo4
Cellular Component	GO:0009898	4	cytoplasmic side of plasma membrane	0.0249793	Q8CMY4	81	K	Probable malate:quinone oxidoreductase 4	mqo4
Cellular Component	GO:0009898	4	cytoplasmic side of plasma membrane	0.0249793	Q8CMY4	205	K	Probable malate:quinone oxidoreductase 4	mqo4
Cellular Component	GO:0009898	4	cytoplasmic side of plasma membrane	0.0249793	Q8CMY4	401	K	Probable malate:quinone oxidoreductase 4	mqo4
Cellular Component	GO:0009898	4	cytoplasmic side of plasma membrane	0.0249793	Q8CMY4	126	K	Probable malate:quinone oxidoreductase 4	mqo4
Cellular Component	GO:0009898	4	cytoplasmic side of plasma membrane	0.0249793	Q8CMY4	290	K	Probable malate:quinone oxidoreductase 4	mqo4
Cellular Component	GO:0009898	4	cytoplasmic side of plasma membrane	0.0249793	Q8CPK5	72	K	Cell division protein FtsA	ftsA
Cellular Component	GO:0009898	4	cytoplasmic side of plasma membrane	0.0249793	Q8CPK5	57	K	Cell division protein FtsA	ftsA
Cellular Component	GO:0009898	4	cytoplasmic side of plasma membrane	0.0249793	Q8CPK5	411	K	Cell division protein FtsA	ftsA
Cellular Component	GO:0009898	4	cytoplasmic side of plasma membrane	0.0249793	Q8CPK5	115	K	Cell division protein FtsA	ftsA
Cellular Component	GO:0009898	4	cytoplasmic side of plasma membrane	0.0249793	Q8CPK5	460	K	Cell division protein FtsA	ftsA
Cellular Component	GO:0009898	4	cytoplasmic side of plasma membrane	0.0249793	Q8CPK5	135	K	Cell division protein FtsA	ftsA
Cellular Component	GO:0009898	4	cytoplasmic side of plasma membrane	0.0249793	Q8CQE8	488	K	Probable malate:quinone oxidoreductase 3	mqo3
Cellular Component	GO:0009898	4	cytoplasmic side of plasma membrane	0.0249793	Q8CQE8	218	K	Probable malate:quinone oxidoreductase 3	mqo3
Cellular Component	GO:0009898	4	cytoplasmic side of plasma membrane	0.0249793	Q8CN91	401	K	Probable malate:quinone oxidoreductase 1	mqo1
Cellular Component	GO:0009898	4	cytoplasmic side of plasma membrane	0.0249793	Q8CN91	212	K	Probable malate:quinone oxidoreductase 1	mqo1
Cellular Component	GO:0009898	4	cytoplasmic side of plasma membrane	0.0249793	Q8CN91	33	K	Probable malate:quinone oxidoreductase 1	mqo1
Cellular Component	GO:0009898	4	cytoplasmic side of plasma membrane	0.0249793	Q8CN91	286	K	Probable malate:quinone oxidoreductase 1	mqo1
Cellular Component	GO:0009898	4	cytoplasmic side of plasma membrane	0.0249793	Q8CN91	486	K	Probable malate:quinone oxidoreductase 1	mqo1
Cellular Component	GO:0009898	4	cytoplasmic side of plasma membrane	0.0249793	Q8CN91	461	K	Probable malate:quinone oxidoreductase 1	mqo1
Cellular Component	GO:0009898	4	cytoplasmic side of plasma membrane	0.0249793	Q8CN91	275	K	Probable malate:quinone oxidoreductase 1	mqo1
Cellular Component	GO:0043228	3	non-membrane-bounded organelle	2.91031e-11	P66175	22	K	50S ribosomal protein L29	rpmC
Cellular Component	GO:0043228	3	non-membrane-bounded organelle	2.91031e-11	Q8CS87	99	K	50S ribosomal protein L21	rplU
Cellular Component	GO:0043228	3	non-membrane-bounded organelle	2.91031e-11	Q8CS87	70	K	50S ribosomal protein L21	rplU
Cellular Component	GO:0043228	3	non-membrane-bounded organelle	2.91031e-11	Q8CRG4	81	K	30S ribosomal protein S19	rpsS
Cellular Component	GO:0043228	3	non-membrane-bounded organelle	2.91031e-11	Q8CRG4	27	K	30S ribosomal protein S19	rpsS
Cellular Component	GO:0043228	3	non-membrane-bounded organelle	2.91031e-11	Q8CRG4	88	K	30S ribosomal protein S19	rpsS
Cellular Component	GO:0043228	3	non-membrane-bounded organelle	2.91031e-11	Q8CRG4	18	K	30S ribosomal protein S19	rpsS
Cellular Component	GO:0043228	3	non-membrane-bounded organelle	2.91031e-11	Q8CRG4	56	K	30S ribosomal protein S19	rpsS
Cellular Component	GO:0043228	3	non-membrane-bounded organelle	2.91031e-11	Q8CRG4	7	K	30S ribosomal protein S19	rpsS
Cellular Component	GO:0043228	3	non-membrane-bounded organelle	2.91031e-11	Q8CRG4	17	K	30S ribosomal protein S19	rpsS
Cellular Component	GO:0043228	3	non-membrane-bounded organelle	2.91031e-11	Q8CRH5	158	K	50S ribosomal protein L6	rplF
Cellular Component	GO:0043228	3	non-membrane-bounded organelle	2.91031e-11	Q8CRH5	59	K	50S ribosomal protein L6	rplF
Cellular Component	GO:0043228	3	non-membrane-bounded organelle	2.91031e-11	Q8CRH5	44	K	50S ribosomal protein L6	rplF
Cellular Component	GO:0043228	3	non-membrane-bounded organelle	2.91031e-11	Q8CST2	13	K	30S ribosomal protein S15	rpsO
Cellular Component	GO:0043228	3	non-membrane-bounded organelle	2.91031e-11	Q8CRG5	27	K	50S ribosomal protein L22	rplV
Cellular Component	GO:0043228	3	non-membrane-bounded organelle	2.91031e-11	Q8CRG5	98	K	50S ribosomal protein L22	rplV
Cellular Component	GO:0043228	3	non-membrane-bounded organelle	2.91031e-11	Q8CRG5	83	K	50S ribosomal protein L22	rplV
Cellular Component	GO:0043228	3	non-membrane-bounded organelle	2.91031e-11	Q8CRG5	111	K	50S ribosomal protein L22	rplV
Cellular Component	GO:0043228	3	non-membrane-bounded organelle	2.91031e-11	Q8CRG7	124	K	50S ribosomal protein L16	rplP
Cellular Component	GO:0043228	3	non-membrane-bounded organelle	2.91031e-11	Q8CRG7	98	K	50S ribosomal protein L16	rplP
Cellular Component	GO:0043228	3	non-membrane-bounded organelle	2.91031e-11	A0A0H2VGE6	365	K	DEAD-box ATP-dependent RNA helicase CshB	cshB
Cellular Component	GO:0043228	3	non-membrane-bounded organelle	2.91031e-11	A0A0H2VGE6	26	K	DEAD-box ATP-dependent RNA helicase CshB	cshB
Cellular Component	GO:0043228	3	non-membrane-bounded organelle	2.91031e-11	Q8CRG0	205	K	50S ribosomal protein L3	rplC
Cellular Component	GO:0043228	3	non-membrane-bounded organelle	2.91031e-11	Q8CRG0	67	K	50S ribosomal protein L3	rplC
Cellular Component	GO:0043228	3	non-membrane-bounded organelle	2.91031e-11	Q8CRG0	39	K	50S ribosomal protein L3	rplC
Cellular Component	GO:0043228	3	non-membrane-bounded organelle	2.91031e-11	Q8CRG0	71	K	50S ribosomal protein L3	rplC
Cellular Component	GO:0043228	3	non-membrane-bounded organelle	2.91031e-11	Q8CRG0	132	K	50S ribosomal protein L3	rplC
Cellular Component	GO:0043228	3	non-membrane-bounded organelle	2.91031e-11	Q8CRG0	125	K	50S ribosomal protein L3	rplC
Cellular Component	GO:0043228	3	non-membrane-bounded organelle	2.91031e-11	Q8CRG0	78	K	50S ribosomal protein L3	rplC
Cellular Component	GO:0043228	3	non-membrane-bounded organelle	2.91031e-11	Q8CRG0	79	K	50S ribosomal protein L3	rplC
Cellular Component	GO:0043228	3	non-membrane-bounded organelle	2.91031e-11	Q8CRJ0	7	K	30S ribosomal protein S9	rpsI
Cellular Component	GO:0043228	3	non-membrane-bounded organelle	2.91031e-11	Q8CS77	33	K	50S ribosomal protein L20	rplT
Cellular Component	GO:0043228	3	non-membrane-bounded organelle	2.91031e-11	Q8CS77	85	K	50S ribosomal protein L20	rplT
Cellular Component	GO:0043228	3	non-membrane-bounded organelle	2.91031e-11	Q8CS77	5	K	50S ribosomal protein L20	rplT
Cellular Component	GO:0043228	3	non-membrane-bounded organelle	2.91031e-11	Q8CRG8	18	K	30S ribosomal protein S17	rpsQ
Cellular Component	GO:0043228	3	non-membrane-bounded organelle	2.91031e-11	Q8CRG8	73	K	30S ribosomal protein S17	rpsQ
Cellular Component	GO:0043228	3	non-membrane-bounded organelle	2.91031e-11	Q8CRG8	47	K	30S ribosomal protein S17	rpsQ
Cellular Component	GO:0043228	3	non-membrane-bounded organelle	2.91031e-11	Q8CRP6	284	K	DEAD-box ATP-dependent RNA helicase CshA	cshA
Cellular Component	GO:0043228	3	non-membrane-bounded organelle	2.91031e-11	Q8CRH1	84	K	50S ribosomal protein L24	rplX
Cellular Component	GO:0043228	3	non-membrane-bounded organelle	2.91031e-11	Q8CRH1	42	K	50S ribosomal protein L24	rplX
Cellular Component	GO:0043228	3	non-membrane-bounded organelle	2.91031e-11	Q8CRH1	102	K	50S ribosomal protein L24	rplX
Cellular Component	GO:0043228	3	non-membrane-bounded organelle	2.91031e-11	Q8CRH1	96	K	50S ribosomal protein L24	rplX
Cellular Component	GO:0043228	3	non-membrane-bounded organelle	2.91031e-11	Q8CRH1	29	K	50S ribosomal protein L24	rplX
Cellular Component	GO:0043228	3	non-membrane-bounded organelle	2.91031e-11	Q8CRM8	63	K	50S ribosomal protein L31 type B	rpmE2
Cellular Component	GO:0043228	3	non-membrane-bounded organelle	2.91031e-11	Q8CRM8	2	K	50S ribosomal protein L31 type B	rpmE2
Cellular Component	GO:0043228	3	non-membrane-bounded organelle	2.91031e-11	P66255	10	K	50S ribosomal protein L34	rpmH
Cellular Component	GO:0043228	3	non-membrane-bounded organelle	2.91031e-11	Q8CRH8	21	K	50S ribosomal protein L30	rpmD
Cellular Component	GO:0043228	3	non-membrane-bounded organelle	2.91031e-11	Q8CRH8	30	K	50S ribosomal protein L30	rpmD
Cellular Component	GO:0043228	3	non-membrane-bounded organelle	2.91031e-11	Q8CRH8	51	K	50S ribosomal protein L30	rpmD
Cellular Component	GO:0043228	3	non-membrane-bounded organelle	2.91031e-11	Q8CRH8	29	K	50S ribosomal protein L30	rpmD
Cellular Component	GO:0043228	3	non-membrane-bounded organelle	2.91031e-11	Q8CSZ2	37	K	50S ribosomal protein L32	rpmF
Cellular Component	GO:0043228	3	non-membrane-bounded organelle	2.91031e-11	Q8CRI2	8	K	50S ribosomal protein L36	rpmJ
Cellular Component	GO:0043228	3	non-membrane-bounded organelle	2.91031e-11	Q8CSE3	41	K	50S ribosomal protein L33 1	rpmG1
Cellular Component	GO:0043228	3	non-membrane-bounded organelle	2.91031e-11	Q8CTF2	61	K	Ribosome hibernation promotion factor	hpf
Cellular Component	GO:0043228	3	non-membrane-bounded organelle	2.91031e-11	Q8CRG6	134	K	30S ribosomal protein S3	rpsC
Cellular Component	GO:0043228	3	non-membrane-bounded organelle	2.91031e-11	Q8CRG6	40	K	30S ribosomal protein S3	rpsC
Cellular Component	GO:0043228	3	non-membrane-bounded organelle	2.91031e-11	Q8CRG6	97	K	30S ribosomal protein S3	rpsC
Cellular Component	GO:0043228	3	non-membrane-bounded organelle	2.91031e-11	Q8CRG6	26	K	30S ribosomal protein S3	rpsC
Cellular Component	GO:0043228	3	non-membrane-bounded organelle	2.91031e-11	Q8CRG6	107	K	30S ribosomal protein S3	rpsC
Cellular Component	GO:0043228	3	non-membrane-bounded organelle	2.91031e-11	Q8CRG6	47	K	30S ribosomal protein S3	rpsC
Cellular Component	GO:0043228	3	non-membrane-bounded organelle	2.91031e-11	Q8CRG6	106	K	30S ribosomal protein S3	rpsC
Cellular Component	GO:0043228	3	non-membrane-bounded organelle	2.91031e-11	Q8CRG6	89	K	30S ribosomal protein S3	rpsC
Cellular Component	GO:0043228	3	non-membrane-bounded organelle	2.91031e-11	Q8CRG6	96	K	30S ribosomal protein S3	rpsC
Cellular Component	GO:0043228	3	non-membrane-bounded organelle	2.91031e-11	Q8CQU8	42	K	50S ribosomal protein L25	rplY
Cellular Component	GO:0043228	3	non-membrane-bounded organelle	2.91031e-11	Q8CRI3	64	K	30S ribosomal protein S13	rpsM
Cellular Component	GO:0043228	3	non-membrane-bounded organelle	2.91031e-11	Q8CRI3	46	K	30S ribosomal protein S13	rpsM
Cellular Component	GO:0043228	3	non-membrane-bounded organelle	2.91031e-11	Q8CRI3	78	K	30S ribosomal protein S13	rpsM
Cellular Component	GO:0043228	3	non-membrane-bounded organelle	2.91031e-11	P66523	8	K	30S ribosomal protein S21	rpsU
Cellular Component	GO:0043228	3	non-membrane-bounded organelle	2.91031e-11	P66523	40	K	30S ribosomal protein S21	rpsU
Cellular Component	GO:0043228	3	non-membrane-bounded organelle	2.91031e-11	P66336	11	K	30S ribosomal protein S10	rpsJ
Cellular Component	GO:0043228	3	non-membrane-bounded organelle	2.91031e-11	P66336	57	K	30S ribosomal protein S10	rpsJ
Cellular Component	GO:0043228	3	non-membrane-bounded organelle	2.91031e-11	P66336	30	K	30S ribosomal protein S10	rpsJ
Cellular Component	GO:0043228	3	non-membrane-bounded organelle	2.91031e-11	P66336	24	K	30S ribosomal protein S10	rpsJ
Cellular Component	GO:0043228	3	non-membrane-bounded organelle	2.91031e-11	Q8CRH7	159	K	30S ribosomal protein S5	rpsE
Cellular Component	GO:0043228	3	non-membrane-bounded organelle	2.91031e-11	Q8CRH7	69	K	30S ribosomal protein S5	rpsE
Cellular Component	GO:0043228	3	non-membrane-bounded organelle	2.91031e-11	Q8CRH7	97	K	30S ribosomal protein S5	rpsE
Cellular Component	GO:0043228	3	non-membrane-bounded organelle	2.91031e-11	Q8CRH7	61	K	30S ribosomal protein S5	rpsE
Cellular Component	GO:0043228	3	non-membrane-bounded organelle	2.91031e-11	Q8CRH7	9	K	30S ribosomal protein S5	rpsE
Cellular Component	GO:0043228	3	non-membrane-bounded organelle	2.91031e-11	Q8CRI5	52	K	50S ribosomal protein L17	rplQ
Cellular Component	GO:0043228	3	non-membrane-bounded organelle	2.91031e-11	Q8CRI5	53	K	50S ribosomal protein L17	rplQ
Cellular Component	GO:0043228	3	non-membrane-bounded organelle	2.91031e-11	Q8CRI5	64	K	50S ribosomal protein L17	rplQ
Cellular Component	GO:0043228	3	non-membrane-bounded organelle	2.91031e-11	Q8CRI5	46	K	50S ribosomal protein L17	rplQ
Cellular Component	GO:0043228	3	non-membrane-bounded organelle	2.91031e-11	Q8CRI5	105	K	50S ribosomal protein L17	rplQ
Cellular Component	GO:0043228	3	non-membrane-bounded organelle	2.91031e-11	Q8CSV0	88	K	30S ribosomal protein S16	rpsP
Cellular Component	GO:0043228	3	non-membrane-bounded organelle	2.91031e-11	Q8CSV0	66	K	30S ribosomal protein S16	rpsP
Cellular Component	GO:0043228	3	non-membrane-bounded organelle	2.91031e-11	Q8CSC6	70	K	30S ribosomal protein S20	rpsT
Cellular Component	GO:0043228	3	non-membrane-bounded organelle	2.91031e-11	Q8CSC6	46	K	30S ribosomal protein S20	rpsT
Cellular Component	GO:0043228	3	non-membrane-bounded organelle	2.91031e-11	Q8CSC6	55	K	30S ribosomal protein S20	rpsT
Cellular Component	GO:0043228	3	non-membrane-bounded organelle	2.91031e-11	Q8CRH2	119	K	50S ribosomal protein L5	rplE
Cellular Component	GO:0043228	3	non-membrane-bounded organelle	2.91031e-11	Q8CRH2	18	K	50S ribosomal protein L5	rplE
Cellular Component	GO:0043228	3	non-membrane-bounded organelle	2.91031e-11	Q8CRH2	72	K	50S ribosomal protein L5	rplE
Cellular Component	GO:0043228	3	non-membrane-bounded organelle	2.91031e-11	Q8CRH2	7	K	50S ribosomal protein L5	rplE
Cellular Component	GO:0043228	3	non-membrane-bounded organelle	2.91031e-11	Q8CRH2	19	K	50S ribosomal protein L5	rplE
Cellular Component	GO:0043228	3	non-membrane-bounded organelle	2.91031e-11	Q8CSP9	41	K	50S ribosomal protein L33 2	rpmG2
Cellular Component	GO:0043228	3	non-membrane-bounded organelle	2.91031e-11	Q8CS54	28	K	30S ribosomal protein S4	rpsD
Cellular Component	GO:0043228	3	non-membrane-bounded organelle	2.91031e-11	Q8CS54	134	K	30S ribosomal protein S4	rpsD
Cellular Component	GO:0043228	3	non-membrane-bounded organelle	2.91031e-11	Q8CS54	144	K	30S ribosomal protein S4	rpsD
Cellular Component	GO:0043228	3	non-membrane-bounded organelle	2.91031e-11	Q8CTT2	53	K	50S ribosomal protein L10	rplJ
Cellular Component	GO:0043228	3	non-membrane-bounded organelle	2.91031e-11	Q8CTT2	56	K	50S ribosomal protein L10	rplJ
Cellular Component	GO:0043228	3	non-membrane-bounded organelle	2.91031e-11	Q8CTT2	101	K	50S ribosomal protein L10	rplJ
Cellular Component	GO:0043228	3	non-membrane-bounded organelle	2.91031e-11	Q8CTT2	9	K	50S ribosomal protein L10	rplJ
Cellular Component	GO:0043228	3	non-membrane-bounded organelle	2.91031e-11	Q8CTT5	81	K	50S ribosomal protein L11	rplK
Cellular Component	GO:0043228	3	non-membrane-bounded organelle	2.91031e-11	Q8CTT5	80	K	50S ribosomal protein L11	rplK
Cellular Component	GO:0043228	3	non-membrane-bounded organelle	2.91031e-11	Q8CRG2	74	K	50S ribosomal protein L23	rplW
Cellular Component	GO:0043228	3	non-membrane-bounded organelle	2.91031e-11	Q8CRG2	59	K	50S ribosomal protein L23	rplW
Cellular Component	GO:0043228	3	non-membrane-bounded organelle	2.91031e-11	Q8CRG2	8	K	50S ribosomal protein L23	rplW
Cellular Component	GO:0043228	3	non-membrane-bounded organelle	2.91031e-11	Q8CRG2	83	K	50S ribosomal protein L23	rplW
Cellular Component	GO:0043228	3	non-membrane-bounded organelle	2.91031e-11	Q8CRG2	24	K	50S ribosomal protein L23	rplW
Cellular Component	GO:0043228	3	non-membrane-bounded organelle	2.91031e-11	P66618	35	K	30S ribosomal protein S7	rpsG
Cellular Component	GO:0043228	3	non-membrane-bounded organelle	2.91031e-11	P66618	25	K	30S ribosomal protein S7	rpsG
Cellular Component	GO:0043228	3	non-membrane-bounded organelle	2.91031e-11	Q8CSU2	81	K	30S ribosomal protein S2	rpsB
Cellular Component	GO:0043228	3	non-membrane-bounded organelle	2.91031e-11	Q8CSU2	74	K	30S ribosomal protein S2	rpsB
Cellular Component	GO:0043228	3	non-membrane-bounded organelle	2.91031e-11	Q8CSU2	49	K	30S ribosomal protein S2	rpsB
Cellular Component	GO:0043228	3	non-membrane-bounded organelle	2.91031e-11	Q8CSU2	138	K	30S ribosomal protein S2	rpsB
Cellular Component	GO:0043228	3	non-membrane-bounded organelle	2.91031e-11	Q8CSU2	132	K	30S ribosomal protein S2	rpsB
Cellular Component	GO:0043228	3	non-membrane-bounded organelle	2.91031e-11	Q8CSU2	73	K	30S ribosomal protein S2	rpsB
Cellular Component	GO:0043228	3	non-membrane-bounded organelle	2.91031e-11	Q8CSU2	29	K	30S ribosomal protein S2	rpsB
Cellular Component	GO:0043228	3	non-membrane-bounded organelle	2.91031e-11	Q8CRG9	53	K	50S ribosomal protein L14	rplN
Cellular Component	GO:0043228	3	non-membrane-bounded organelle	2.91031e-11	Q8CRG9	9	K	50S ribosomal protein L14	rplN
Cellular Component	GO:0043228	3	non-membrane-bounded organelle	2.91031e-11	Q8CRH4	33	K	30S ribosomal protein S8	rpsH
Cellular Component	GO:0043228	3	non-membrane-bounded organelle	2.91031e-11	Q8CRH4	90	K	30S ribosomal protein S8	rpsH
Cellular Component	GO:0043228	3	non-membrane-bounded organelle	2.91031e-11	Q8CRH4	78	K	30S ribosomal protein S8	rpsH
Cellular Component	GO:0043228	3	non-membrane-bounded organelle	2.91031e-11	Q8CRH4	41	K	30S ribosomal protein S8	rpsH
Cellular Component	GO:0043228	3	non-membrane-bounded organelle	2.91031e-11	Q8CRH4	34	K	30S ribosomal protein S8	rpsH
Cellular Component	GO:0043228	3	non-membrane-bounded organelle	2.91031e-11	Q8CRH4	56	K	30S ribosomal protein S8	rpsH
Cellular Component	GO:0043228	3	non-membrane-bounded organelle	2.91031e-11	Q8CRH4	24	K	30S ribosomal protein S8	rpsH
Cellular Component	GO:0043228	3	non-membrane-bounded organelle	2.91031e-11	Q8CRH4	65	K	30S ribosomal protein S8	rpsH
Cellular Component	GO:0043228	3	non-membrane-bounded organelle	2.91031e-11	Q8CRH4	82	K	30S ribosomal protein S8	rpsH
Cellular Component	GO:0043228	3	non-membrane-bounded organelle	2.91031e-11	Q8CSU9	85	K	50S ribosomal protein L19	rplS
Cellular Component	GO:0043228	3	non-membrane-bounded organelle	2.91031e-11	Q8CSU9	65	K	50S ribosomal protein L19	rplS
Cellular Component	GO:0043228	3	non-membrane-bounded organelle	2.91031e-11	Q8CRH6	38	K	50S ribosomal protein L18	rplR
Cellular Component	GO:0043228	3	non-membrane-bounded organelle	2.91031e-11	Q8CRH6	28	K	50S ribosomal protein L18	rplR
Cellular Component	GO:0043228	3	non-membrane-bounded organelle	2.91031e-11	Q8CRH6	21	K	50S ribosomal protein L18	rplR
Cellular Component	GO:0043228	3	non-membrane-bounded organelle	2.91031e-11	Q8CRH6	83	K	50S ribosomal protein L18	rplR
Cellular Component	GO:0043228	3	non-membrane-bounded organelle	2.91031e-11	Q8CRH6	61	K	50S ribosomal protein L18	rplR
Cellular Component	GO:0043228	3	non-membrane-bounded organelle	2.91031e-11	Q8CRH6	107	K	50S ribosomal protein L18	rplR
Cellular Component	GO:0043228	3	non-membrane-bounded organelle	2.91031e-11	Q8CTS8	101	K	30S ribosomal protein S12	rpsL
Cellular Component	GO:0043228	3	non-membrane-bounded organelle	2.91031e-11	Q8CTS8	43	K	30S ribosomal protein S12	rpsL
Cellular Component	GO:0043228	3	non-membrane-bounded organelle	2.91031e-11	Q8CTS8	17	K	30S ribosomal protein S12	rpsL
Cellular Component	GO:0043228	3	non-membrane-bounded organelle	2.91031e-11	Q8CQP4	19	K	30S ribosomal protein S6	rpsF
Cellular Component	GO:0043228	3	non-membrane-bounded organelle	2.91031e-11	Q8CQP6	35	K	30S ribosomal protein S18	rpsR
Cellular Component	GO:0043228	3	non-membrane-bounded organelle	2.91031e-11	Q8CQP6	77	K	30S ribosomal protein S18	rpsR
Cellular Component	GO:0043228	3	non-membrane-bounded organelle	2.91031e-11	Q8CQP6	65	K	30S ribosomal protein S18	rpsR
Cellular Component	GO:0043228	3	non-membrane-bounded organelle	2.91031e-11	Q8CQP6	55	K	30S ribosomal protein S18	rpsR
Cellular Component	GO:0043228	3	non-membrane-bounded organelle	2.91031e-11	Q8CS89	76	K	50S ribosomal protein L27	rpmA
Cellular Component	GO:0043228	3	non-membrane-bounded organelle	2.91031e-11	Q8CS76	65	K	50S ribosomal protein L35	rpmI
Cellular Component	GO:0043228	3	non-membrane-bounded organelle	2.91031e-11	Q8CRI9	69	K	50S ribosomal protein L13	rplM
Cellular Component	GO:0043228	3	non-membrane-bounded organelle	2.91031e-11	Q8CRI9	94	K	50S ribosomal protein L13	rplM
Cellular Component	GO:0043228	3	non-membrane-bounded organelle	2.91031e-11	Q8CRI9	122	K	50S ribosomal protein L13	rplM
Cellular Component	GO:0043228	3	non-membrane-bounded organelle	2.91031e-11	Q8CRI9	15	K	50S ribosomal protein L13	rplM
Cellular Component	GO:0043228	3	non-membrane-bounded organelle	2.91031e-11	Q8CRG1	52	K	50S ribosomal protein L4	rplD
Cellular Component	GO:0043228	3	non-membrane-bounded organelle	2.91031e-11	Q8CRG1	201	K	50S ribosomal protein L4	rplD
Cellular Component	GO:0043228	3	non-membrane-bounded organelle	2.91031e-11	Q8CRG1	140	K	50S ribosomal protein L4	rplD
Cellular Component	GO:0043228	3	non-membrane-bounded organelle	2.91031e-11	Q8CRG1	150	K	50S ribosomal protein L4	rplD
Cellular Component	GO:0043228	3	non-membrane-bounded organelle	2.91031e-11	Q8CRG3	252	K	50S ribosomal protein L2	rplB
Cellular Component	GO:0043228	3	non-membrane-bounded organelle	2.91031e-11	Q8CRG3	71	K	50S ribosomal protein L2	rplB
Cellular Component	GO:0043228	3	non-membrane-bounded organelle	2.91031e-11	Q8CRG3	7	K	50S ribosomal protein L2	rplB
Cellular Component	GO:0043228	3	non-membrane-bounded organelle	2.91031e-11	Q8CRG3	268	K	50S ribosomal protein L2	rplB
Cellular Component	GO:0043228	3	non-membrane-bounded organelle	2.91031e-11	Q8CRG3	31	K	50S ribosomal protein L2	rplB
Cellular Component	GO:0043228	3	non-membrane-bounded organelle	2.91031e-11	Q8CTT4	151	K	50S ribosomal protein L1	rplA
Cellular Component	GO:0043228	3	non-membrane-bounded organelle	2.91031e-11	Q8CTT4	7	K	50S ribosomal protein L1	rplA
Cellular Component	GO:0043228	3	non-membrane-bounded organelle	2.91031e-11	Q8CTT4	230	K	50S ribosomal protein L1	rplA
Cellular Component	GO:0043228	3	non-membrane-bounded organelle	2.91031e-11	Q8CTT4	160	K	50S ribosomal protein L1	rplA
Cellular Component	GO:0043228	3	non-membrane-bounded organelle	2.91031e-11	Q8CTT4	150	K	50S ribosomal protein L1	rplA
Cellular Component	GO:0043228	3	non-membrane-bounded organelle	2.91031e-11	Q8CTT4	54	K	50S ribosomal protein L1	rplA
Cellular Component	GO:0043228	3	non-membrane-bounded organelle	2.91031e-11	Q8CTT4	14	K	50S ribosomal protein L1	rplA
Cellular Component	GO:0043228	3	non-membrane-bounded organelle	2.91031e-11	A0A0H2VKZ1	267	K	Transcription terminator	SE_2378
Cellular Component	GO:0043228	3	non-membrane-bounded organelle	2.91031e-11	Q8CU90	109	K	50S ribosomal protein L9	rplI
Cellular Component	GO:0043228	3	non-membrane-bounded organelle	2.91031e-11	Q8CU90	69	K	50S ribosomal protein L9	rplI
Cellular Component	GO:0043228	3	non-membrane-bounded organelle	2.91031e-11	Q8CU90	52	K	50S ribosomal protein L9	rplI
Cellular Component	GO:0043228	3	non-membrane-bounded organelle	2.91031e-11	Q8CU90	103	K	50S ribosomal protein L9	rplI
Cellular Component	GO:0043228	3	non-membrane-bounded organelle	2.91031e-11	Q8CU90	34	K	50S ribosomal protein L9	rplI
Cellular Component	GO:0043228	3	non-membrane-bounded organelle	2.91031e-11	Q8CU90	73	K	50S ribosomal protein L9	rplI
Cellular Component	GO:0043228	3	non-membrane-bounded organelle	2.91031e-11	Q8CRH9	124	K	50S ribosomal protein L15	rplO
Cellular Component	GO:0043228	3	non-membrane-bounded organelle	2.91031e-11	Q8CRH9	119	K	50S ribosomal protein L15	rplO
Cellular Component	GO:0043228	3	non-membrane-bounded organelle	2.91031e-11	Q8CRH9	106	K	50S ribosomal protein L15	rplO
Cellular Component	GO:0043228	3	non-membrane-bounded organelle	2.91031e-11	Q8CRH9	7	K	50S ribosomal protein L15	rplO
Cellular Component	GO:0043228	3	non-membrane-bounded organelle	2.91031e-11	Q8CRH9	2	K	50S ribosomal protein L15	rplO
Cellular Component	GO:0022626	6	cytosolic ribosome	4.87919e-15	P66175	22	K	50S ribosomal protein L29	rpmC
Cellular Component	GO:0022626	6	cytosolic ribosome	4.87919e-15	Q8CS87	99	K	50S ribosomal protein L21	rplU
Cellular Component	GO:0022626	6	cytosolic ribosome	4.87919e-15	Q8CS87	70	K	50S ribosomal protein L21	rplU
Cellular Component	GO:0022626	6	cytosolic ribosome	4.87919e-15	Q8CRG4	81	K	30S ribosomal protein S19	rpsS
Cellular Component	GO:0022626	6	cytosolic ribosome	4.87919e-15	Q8CRG4	27	K	30S ribosomal protein S19	rpsS
Cellular Component	GO:0022626	6	cytosolic ribosome	4.87919e-15	Q8CRG4	88	K	30S ribosomal protein S19	rpsS
Cellular Component	GO:0022626	6	cytosolic ribosome	4.87919e-15	Q8CRG4	18	K	30S ribosomal protein S19	rpsS
Cellular Component	GO:0022626	6	cytosolic ribosome	4.87919e-15	Q8CRG4	56	K	30S ribosomal protein S19	rpsS
Cellular Component	GO:0022626	6	cytosolic ribosome	4.87919e-15	Q8CRG4	7	K	30S ribosomal protein S19	rpsS
Cellular Component	GO:0022626	6	cytosolic ribosome	4.87919e-15	Q8CRG4	17	K	30S ribosomal protein S19	rpsS
Cellular Component	GO:0022626	6	cytosolic ribosome	4.87919e-15	Q8CRH5	158	K	50S ribosomal protein L6	rplF
Cellular Component	GO:0022626	6	cytosolic ribosome	4.87919e-15	Q8CRH5	59	K	50S ribosomal protein L6	rplF
Cellular Component	GO:0022626	6	cytosolic ribosome	4.87919e-15	Q8CRH5	44	K	50S ribosomal protein L6	rplF
Cellular Component	GO:0022626	6	cytosolic ribosome	4.87919e-15	Q8CST2	13	K	30S ribosomal protein S15	rpsO
Cellular Component	GO:0022626	6	cytosolic ribosome	4.87919e-15	Q8CRG5	27	K	50S ribosomal protein L22	rplV
Cellular Component	GO:0022626	6	cytosolic ribosome	4.87919e-15	Q8CRG5	98	K	50S ribosomal protein L22	rplV
Cellular Component	GO:0022626	6	cytosolic ribosome	4.87919e-15	Q8CRG5	83	K	50S ribosomal protein L22	rplV
Cellular Component	GO:0022626	6	cytosolic ribosome	4.87919e-15	Q8CRG5	111	K	50S ribosomal protein L22	rplV
Cellular Component	GO:0022626	6	cytosolic ribosome	4.87919e-15	Q8CRG7	124	K	50S ribosomal protein L16	rplP
Cellular Component	GO:0022626	6	cytosolic ribosome	4.87919e-15	Q8CRG7	98	K	50S ribosomal protein L16	rplP
Cellular Component	GO:0022626	6	cytosolic ribosome	4.87919e-15	Q8CRG0	205	K	50S ribosomal protein L3	rplC
Cellular Component	GO:0022626	6	cytosolic ribosome	4.87919e-15	Q8CRG0	67	K	50S ribosomal protein L3	rplC
Cellular Component	GO:0022626	6	cytosolic ribosome	4.87919e-15	Q8CRG0	39	K	50S ribosomal protein L3	rplC
Cellular Component	GO:0022626	6	cytosolic ribosome	4.87919e-15	Q8CRG0	71	K	50S ribosomal protein L3	rplC
Cellular Component	GO:0022626	6	cytosolic ribosome	4.87919e-15	Q8CRG0	132	K	50S ribosomal protein L3	rplC
Cellular Component	GO:0022626	6	cytosolic ribosome	4.87919e-15	Q8CRG0	125	K	50S ribosomal protein L3	rplC
Cellular Component	GO:0022626	6	cytosolic ribosome	4.87919e-15	Q8CRG0	78	K	50S ribosomal protein L3	rplC
Cellular Component	GO:0022626	6	cytosolic ribosome	4.87919e-15	Q8CRG0	79	K	50S ribosomal protein L3	rplC
Cellular Component	GO:0022626	6	cytosolic ribosome	4.87919e-15	Q8CRJ0	7	K	30S ribosomal protein S9	rpsI
Cellular Component	GO:0022626	6	cytosolic ribosome	4.87919e-15	Q8CS77	33	K	50S ribosomal protein L20	rplT
Cellular Component	GO:0022626	6	cytosolic ribosome	4.87919e-15	Q8CS77	85	K	50S ribosomal protein L20	rplT
Cellular Component	GO:0022626	6	cytosolic ribosome	4.87919e-15	Q8CS77	5	K	50S ribosomal protein L20	rplT
Cellular Component	GO:0022626	6	cytosolic ribosome	4.87919e-15	Q8CRG8	18	K	30S ribosomal protein S17	rpsQ
Cellular Component	GO:0022626	6	cytosolic ribosome	4.87919e-15	Q8CRG8	73	K	30S ribosomal protein S17	rpsQ
Cellular Component	GO:0022626	6	cytosolic ribosome	4.87919e-15	Q8CRG8	47	K	30S ribosomal protein S17	rpsQ
Cellular Component	GO:0022626	6	cytosolic ribosome	4.87919e-15	Q8CRH1	84	K	50S ribosomal protein L24	rplX
Cellular Component	GO:0022626	6	cytosolic ribosome	4.87919e-15	Q8CRH1	42	K	50S ribosomal protein L24	rplX
Cellular Component	GO:0022626	6	cytosolic ribosome	4.87919e-15	Q8CRH1	102	K	50S ribosomal protein L24	rplX
Cellular Component	GO:0022626	6	cytosolic ribosome	4.87919e-15	Q8CRH1	96	K	50S ribosomal protein L24	rplX
Cellular Component	GO:0022626	6	cytosolic ribosome	4.87919e-15	Q8CRH1	29	K	50S ribosomal protein L24	rplX
Cellular Component	GO:0022626	6	cytosolic ribosome	4.87919e-15	Q8CRM8	63	K	50S ribosomal protein L31 type B	rpmE2
Cellular Component	GO:0022626	6	cytosolic ribosome	4.87919e-15	Q8CRM8	2	K	50S ribosomal protein L31 type B	rpmE2
Cellular Component	GO:0022626	6	cytosolic ribosome	4.87919e-15	P66255	10	K	50S ribosomal protein L34	rpmH
Cellular Component	GO:0022626	6	cytosolic ribosome	4.87919e-15	Q8CRH8	21	K	50S ribosomal protein L30	rpmD
Cellular Component	GO:0022626	6	cytosolic ribosome	4.87919e-15	Q8CRH8	30	K	50S ribosomal protein L30	rpmD
Cellular Component	GO:0022626	6	cytosolic ribosome	4.87919e-15	Q8CRH8	51	K	50S ribosomal protein L30	rpmD
Cellular Component	GO:0022626	6	cytosolic ribosome	4.87919e-15	Q8CRH8	29	K	50S ribosomal protein L30	rpmD
Cellular Component	GO:0022626	6	cytosolic ribosome	4.87919e-15	Q8CSZ2	37	K	50S ribosomal protein L32	rpmF
Cellular Component	GO:0022626	6	cytosolic ribosome	4.87919e-15	Q8CRI2	8	K	50S ribosomal protein L36	rpmJ
Cellular Component	GO:0022626	6	cytosolic ribosome	4.87919e-15	Q8CSE3	41	K	50S ribosomal protein L33 1	rpmG1
Cellular Component	GO:0022626	6	cytosolic ribosome	4.87919e-15	Q8CTF2	61	K	Ribosome hibernation promotion factor	hpf
Cellular Component	GO:0022626	6	cytosolic ribosome	4.87919e-15	Q8CRG6	134	K	30S ribosomal protein S3	rpsC
Cellular Component	GO:0022626	6	cytosolic ribosome	4.87919e-15	Q8CRG6	40	K	30S ribosomal protein S3	rpsC
Cellular Component	GO:0022626	6	cytosolic ribosome	4.87919e-15	Q8CRG6	97	K	30S ribosomal protein S3	rpsC
Cellular Component	GO:0022626	6	cytosolic ribosome	4.87919e-15	Q8CRG6	26	K	30S ribosomal protein S3	rpsC
Cellular Component	GO:0022626	6	cytosolic ribosome	4.87919e-15	Q8CRG6	107	K	30S ribosomal protein S3	rpsC
Cellular Component	GO:0022626	6	cytosolic ribosome	4.87919e-15	Q8CRG6	47	K	30S ribosomal protein S3	rpsC
Cellular Component	GO:0022626	6	cytosolic ribosome	4.87919e-15	Q8CRG6	106	K	30S ribosomal protein S3	rpsC
Cellular Component	GO:0022626	6	cytosolic ribosome	4.87919e-15	Q8CRG6	89	K	30S ribosomal protein S3	rpsC
Cellular Component	GO:0022626	6	cytosolic ribosome	4.87919e-15	Q8CRG6	96	K	30S ribosomal protein S3	rpsC
Cellular Component	GO:0022626	6	cytosolic ribosome	4.87919e-15	Q8CQU8	42	K	50S ribosomal protein L25	rplY
Cellular Component	GO:0022626	6	cytosolic ribosome	4.87919e-15	Q8CRI3	64	K	30S ribosomal protein S13	rpsM
Cellular Component	GO:0022626	6	cytosolic ribosome	4.87919e-15	Q8CRI3	46	K	30S ribosomal protein S13	rpsM
Cellular Component	GO:0022626	6	cytosolic ribosome	4.87919e-15	Q8CRI3	78	K	30S ribosomal protein S13	rpsM
Cellular Component	GO:0022626	6	cytosolic ribosome	4.87919e-15	P66523	8	K	30S ribosomal protein S21	rpsU
Cellular Component	GO:0022626	6	cytosolic ribosome	4.87919e-15	P66523	40	K	30S ribosomal protein S21	rpsU
Cellular Component	GO:0022626	6	cytosolic ribosome	4.87919e-15	P66336	11	K	30S ribosomal protein S10	rpsJ
Cellular Component	GO:0022626	6	cytosolic ribosome	4.87919e-15	P66336	57	K	30S ribosomal protein S10	rpsJ
Cellular Component	GO:0022626	6	cytosolic ribosome	4.87919e-15	P66336	30	K	30S ribosomal protein S10	rpsJ
Cellular Component	GO:0022626	6	cytosolic ribosome	4.87919e-15	P66336	24	K	30S ribosomal protein S10	rpsJ
Cellular Component	GO:0022626	6	cytosolic ribosome	4.87919e-15	Q8CRH7	159	K	30S ribosomal protein S5	rpsE
Cellular Component	GO:0022626	6	cytosolic ribosome	4.87919e-15	Q8CRH7	69	K	30S ribosomal protein S5	rpsE
Cellular Component	GO:0022626	6	cytosolic ribosome	4.87919e-15	Q8CRH7	97	K	30S ribosomal protein S5	rpsE
Cellular Component	GO:0022626	6	cytosolic ribosome	4.87919e-15	Q8CRH7	61	K	30S ribosomal protein S5	rpsE
Cellular Component	GO:0022626	6	cytosolic ribosome	4.87919e-15	Q8CRH7	9	K	30S ribosomal protein S5	rpsE
Cellular Component	GO:0022626	6	cytosolic ribosome	4.87919e-15	Q8CRI5	52	K	50S ribosomal protein L17	rplQ
Cellular Component	GO:0022626	6	cytosolic ribosome	4.87919e-15	Q8CRI5	53	K	50S ribosomal protein L17	rplQ
Cellular Component	GO:0022626	6	cytosolic ribosome	4.87919e-15	Q8CRI5	64	K	50S ribosomal protein L17	rplQ
Cellular Component	GO:0022626	6	cytosolic ribosome	4.87919e-15	Q8CRI5	46	K	50S ribosomal protein L17	rplQ
Cellular Component	GO:0022626	6	cytosolic ribosome	4.87919e-15	Q8CRI5	105	K	50S ribosomal protein L17	rplQ
Cellular Component	GO:0022626	6	cytosolic ribosome	4.87919e-15	Q8CSV0	88	K	30S ribosomal protein S16	rpsP
Cellular Component	GO:0022626	6	cytosolic ribosome	4.87919e-15	Q8CSV0	66	K	30S ribosomal protein S16	rpsP
Cellular Component	GO:0022626	6	cytosolic ribosome	4.87919e-15	Q8CSC6	70	K	30S ribosomal protein S20	rpsT
Cellular Component	GO:0022626	6	cytosolic ribosome	4.87919e-15	Q8CSC6	46	K	30S ribosomal protein S20	rpsT
Cellular Component	GO:0022626	6	cytosolic ribosome	4.87919e-15	Q8CSC6	55	K	30S ribosomal protein S20	rpsT
Cellular Component	GO:0022626	6	cytosolic ribosome	4.87919e-15	Q8CRH2	119	K	50S ribosomal protein L5	rplE
Cellular Component	GO:0022626	6	cytosolic ribosome	4.87919e-15	Q8CRH2	18	K	50S ribosomal protein L5	rplE
Cellular Component	GO:0022626	6	cytosolic ribosome	4.87919e-15	Q8CRH2	72	K	50S ribosomal protein L5	rplE
Cellular Component	GO:0022626	6	cytosolic ribosome	4.87919e-15	Q8CRH2	7	K	50S ribosomal protein L5	rplE
Cellular Component	GO:0022626	6	cytosolic ribosome	4.87919e-15	Q8CRH2	19	K	50S ribosomal protein L5	rplE
Cellular Component	GO:0022626	6	cytosolic ribosome	4.87919e-15	Q8CSP9	41	K	50S ribosomal protein L33 2	rpmG2
Cellular Component	GO:0022626	6	cytosolic ribosome	4.87919e-15	Q8CTT2	53	K	50S ribosomal protein L10	rplJ
Cellular Component	GO:0022626	6	cytosolic ribosome	4.87919e-15	Q8CTT2	56	K	50S ribosomal protein L10	rplJ
Cellular Component	GO:0022626	6	cytosolic ribosome	4.87919e-15	Q8CTT2	101	K	50S ribosomal protein L10	rplJ
Cellular Component	GO:0022626	6	cytosolic ribosome	4.87919e-15	Q8CTT2	9	K	50S ribosomal protein L10	rplJ
Cellular Component	GO:0022626	6	cytosolic ribosome	4.87919e-15	Q8CTT5	81	K	50S ribosomal protein L11	rplK
Cellular Component	GO:0022626	6	cytosolic ribosome	4.87919e-15	Q8CTT5	80	K	50S ribosomal protein L11	rplK
Cellular Component	GO:0022626	6	cytosolic ribosome	4.87919e-15	Q8CRG2	74	K	50S ribosomal protein L23	rplW
Cellular Component	GO:0022626	6	cytosolic ribosome	4.87919e-15	Q8CRG2	59	K	50S ribosomal protein L23	rplW
Cellular Component	GO:0022626	6	cytosolic ribosome	4.87919e-15	Q8CRG2	8	K	50S ribosomal protein L23	rplW
Cellular Component	GO:0022626	6	cytosolic ribosome	4.87919e-15	Q8CRG2	83	K	50S ribosomal protein L23	rplW
Cellular Component	GO:0022626	6	cytosolic ribosome	4.87919e-15	Q8CRG2	24	K	50S ribosomal protein L23	rplW
Cellular Component	GO:0022626	6	cytosolic ribosome	4.87919e-15	P66618	35	K	30S ribosomal protein S7	rpsG
Cellular Component	GO:0022626	6	cytosolic ribosome	4.87919e-15	P66618	25	K	30S ribosomal protein S7	rpsG
Cellular Component	GO:0022626	6	cytosolic ribosome	4.87919e-15	Q8CSU2	81	K	30S ribosomal protein S2	rpsB
Cellular Component	GO:0022626	6	cytosolic ribosome	4.87919e-15	Q8CSU2	74	K	30S ribosomal protein S2	rpsB
Cellular Component	GO:0022626	6	cytosolic ribosome	4.87919e-15	Q8CSU2	49	K	30S ribosomal protein S2	rpsB
Cellular Component	GO:0022626	6	cytosolic ribosome	4.87919e-15	Q8CSU2	138	K	30S ribosomal protein S2	rpsB
Cellular Component	GO:0022626	6	cytosolic ribosome	4.87919e-15	Q8CSU2	132	K	30S ribosomal protein S2	rpsB
Cellular Component	GO:0022626	6	cytosolic ribosome	4.87919e-15	Q8CSU2	73	K	30S ribosomal protein S2	rpsB
Cellular Component	GO:0022626	6	cytosolic ribosome	4.87919e-15	Q8CSU2	29	K	30S ribosomal protein S2	rpsB
Cellular Component	GO:0022626	6	cytosolic ribosome	4.87919e-15	Q8CRG9	53	K	50S ribosomal protein L14	rplN
Cellular Component	GO:0022626	6	cytosolic ribosome	4.87919e-15	Q8CRG9	9	K	50S ribosomal protein L14	rplN
Cellular Component	GO:0022626	6	cytosolic ribosome	4.87919e-15	Q8CRH4	33	K	30S ribosomal protein S8	rpsH
Cellular Component	GO:0022626	6	cytosolic ribosome	4.87919e-15	Q8CRH4	90	K	30S ribosomal protein S8	rpsH
Cellular Component	GO:0022626	6	cytosolic ribosome	4.87919e-15	Q8CRH4	78	K	30S ribosomal protein S8	rpsH
Cellular Component	GO:0022626	6	cytosolic ribosome	4.87919e-15	Q8CRH4	41	K	30S ribosomal protein S8	rpsH
Cellular Component	GO:0022626	6	cytosolic ribosome	4.87919e-15	Q8CRH4	34	K	30S ribosomal protein S8	rpsH
Cellular Component	GO:0022626	6	cytosolic ribosome	4.87919e-15	Q8CRH4	56	K	30S ribosomal protein S8	rpsH
Cellular Component	GO:0022626	6	cytosolic ribosome	4.87919e-15	Q8CRH4	24	K	30S ribosomal protein S8	rpsH
Cellular Component	GO:0022626	6	cytosolic ribosome	4.87919e-15	Q8CRH4	65	K	30S ribosomal protein S8	rpsH
Cellular Component	GO:0022626	6	cytosolic ribosome	4.87919e-15	Q8CRH4	82	K	30S ribosomal protein S8	rpsH
Cellular Component	GO:0022626	6	cytosolic ribosome	4.87919e-15	Q8CSU9	85	K	50S ribosomal protein L19	rplS
Cellular Component	GO:0022626	6	cytosolic ribosome	4.87919e-15	Q8CSU9	65	K	50S ribosomal protein L19	rplS
Cellular Component	GO:0022626	6	cytosolic ribosome	4.87919e-15	Q8CRH6	38	K	50S ribosomal protein L18	rplR
Cellular Component	GO:0022626	6	cytosolic ribosome	4.87919e-15	Q8CRH6	28	K	50S ribosomal protein L18	rplR
Cellular Component	GO:0022626	6	cytosolic ribosome	4.87919e-15	Q8CRH6	21	K	50S ribosomal protein L18	rplR
Cellular Component	GO:0022626	6	cytosolic ribosome	4.87919e-15	Q8CRH6	83	K	50S ribosomal protein L18	rplR
Cellular Component	GO:0022626	6	cytosolic ribosome	4.87919e-15	Q8CRH6	61	K	50S ribosomal protein L18	rplR
Cellular Component	GO:0022626	6	cytosolic ribosome	4.87919e-15	Q8CRH6	107	K	50S ribosomal protein L18	rplR
Cellular Component	GO:0022626	6	cytosolic ribosome	4.87919e-15	Q8CQP4	19	K	30S ribosomal protein S6	rpsF
Cellular Component	GO:0022626	6	cytosolic ribosome	4.87919e-15	Q8CQP6	35	K	30S ribosomal protein S18	rpsR
Cellular Component	GO:0022626	6	cytosolic ribosome	4.87919e-15	Q8CQP6	77	K	30S ribosomal protein S18	rpsR
Cellular Component	GO:0022626	6	cytosolic ribosome	4.87919e-15	Q8CQP6	65	K	30S ribosomal protein S18	rpsR
Cellular Component	GO:0022626	6	cytosolic ribosome	4.87919e-15	Q8CQP6	55	K	30S ribosomal protein S18	rpsR
Cellular Component	GO:0022626	6	cytosolic ribosome	4.87919e-15	Q8CS89	76	K	50S ribosomal protein L27	rpmA
Cellular Component	GO:0022626	6	cytosolic ribosome	4.87919e-15	Q8CS76	65	K	50S ribosomal protein L35	rpmI
Cellular Component	GO:0022626	6	cytosolic ribosome	4.87919e-15	Q8CRI9	69	K	50S ribosomal protein L13	rplM
Cellular Component	GO:0022626	6	cytosolic ribosome	4.87919e-15	Q8CRI9	94	K	50S ribosomal protein L13	rplM
Cellular Component	GO:0022626	6	cytosolic ribosome	4.87919e-15	Q8CRI9	122	K	50S ribosomal protein L13	rplM
Cellular Component	GO:0022626	6	cytosolic ribosome	4.87919e-15	Q8CRI9	15	K	50S ribosomal protein L13	rplM
Cellular Component	GO:0022626	6	cytosolic ribosome	4.87919e-15	Q8CRG1	52	K	50S ribosomal protein L4	rplD
Cellular Component	GO:0022626	6	cytosolic ribosome	4.87919e-15	Q8CRG1	201	K	50S ribosomal protein L4	rplD
Cellular Component	GO:0022626	6	cytosolic ribosome	4.87919e-15	Q8CRG1	140	K	50S ribosomal protein L4	rplD
Cellular Component	GO:0022626	6	cytosolic ribosome	4.87919e-15	Q8CRG1	150	K	50S ribosomal protein L4	rplD
Cellular Component	GO:0022626	6	cytosolic ribosome	4.87919e-15	Q8CRG3	252	K	50S ribosomal protein L2	rplB
Cellular Component	GO:0022626	6	cytosolic ribosome	4.87919e-15	Q8CRG3	71	K	50S ribosomal protein L2	rplB
Cellular Component	GO:0022626	6	cytosolic ribosome	4.87919e-15	Q8CRG3	7	K	50S ribosomal protein L2	rplB
Cellular Component	GO:0022626	6	cytosolic ribosome	4.87919e-15	Q8CRG3	268	K	50S ribosomal protein L2	rplB
Cellular Component	GO:0022626	6	cytosolic ribosome	4.87919e-15	Q8CRG3	31	K	50S ribosomal protein L2	rplB
Cellular Component	GO:0022626	6	cytosolic ribosome	4.87919e-15	Q8CTT4	151	K	50S ribosomal protein L1	rplA
Cellular Component	GO:0022626	6	cytosolic ribosome	4.87919e-15	Q8CTT4	7	K	50S ribosomal protein L1	rplA
Cellular Component	GO:0022626	6	cytosolic ribosome	4.87919e-15	Q8CTT4	230	K	50S ribosomal protein L1	rplA
Cellular Component	GO:0022626	6	cytosolic ribosome	4.87919e-15	Q8CTT4	160	K	50S ribosomal protein L1	rplA
Cellular Component	GO:0022626	6	cytosolic ribosome	4.87919e-15	Q8CTT4	150	K	50S ribosomal protein L1	rplA
Cellular Component	GO:0022626	6	cytosolic ribosome	4.87919e-15	Q8CTT4	54	K	50S ribosomal protein L1	rplA
Cellular Component	GO:0022626	6	cytosolic ribosome	4.87919e-15	Q8CTT4	14	K	50S ribosomal protein L1	rplA
Cellular Component	GO:0022626	6	cytosolic ribosome	4.87919e-15	Q8CU90	109	K	50S ribosomal protein L9	rplI
Cellular Component	GO:0022626	6	cytosolic ribosome	4.87919e-15	Q8CU90	69	K	50S ribosomal protein L9	rplI
Cellular Component	GO:0022626	6	cytosolic ribosome	4.87919e-15	Q8CU90	52	K	50S ribosomal protein L9	rplI
Cellular Component	GO:0022626	6	cytosolic ribosome	4.87919e-15	Q8CU90	103	K	50S ribosomal protein L9	rplI
Cellular Component	GO:0022626	6	cytosolic ribosome	4.87919e-15	Q8CU90	34	K	50S ribosomal protein L9	rplI
Cellular Component	GO:0022626	6	cytosolic ribosome	4.87919e-15	Q8CU90	73	K	50S ribosomal protein L9	rplI
Cellular Component	GO:0022626	6	cytosolic ribosome	4.87919e-15	Q8CRH9	124	K	50S ribosomal protein L15	rplO
Cellular Component	GO:0022626	6	cytosolic ribosome	4.87919e-15	Q8CRH9	119	K	50S ribosomal protein L15	rplO
Cellular Component	GO:0022626	6	cytosolic ribosome	4.87919e-15	Q8CRH9	106	K	50S ribosomal protein L15	rplO
Cellular Component	GO:0022626	6	cytosolic ribosome	4.87919e-15	Q8CRH9	7	K	50S ribosomal protein L15	rplO
Cellular Component	GO:0022626	6	cytosolic ribosome	4.87919e-15	Q8CRH9	2	K	50S ribosomal protein L15	rplO
Cellular Component	GO:0098552	2	side of membrane	0.0130551	Q8CQ96	196	K	Probable malate:quinone oxidoreductase 2	mqo2
Cellular Component	GO:0098552	2	side of membrane	0.0130551	A0A0H2VJ83	70	K	Nitrate reductase beta chain narH	SE_1974
Cellular Component	GO:0098552	2	side of membrane	0.0130551	A0A0H2VJ83	290	K	Nitrate reductase beta chain narH	SE_1974
Cellular Component	GO:0098552	2	side of membrane	0.0130551	A0A0H2VHP1	1070	K	Respiratory nitrate reductase alpha chain	SE_1975
Cellular Component	GO:0098552	2	side of membrane	0.0130551	A0A0H2VHP1	10	K	Respiratory nitrate reductase alpha chain	SE_1975
Cellular Component	GO:0098552	2	side of membrane	0.0130551	A0A0H2VHP1	107	K	Respiratory nitrate reductase alpha chain	SE_1975
Cellular Component	GO:0098552	2	side of membrane	0.0130551	Q8CMY4	189	K	Probable malate:quinone oxidoreductase 4	mqo4
Cellular Component	GO:0098552	2	side of membrane	0.0130551	Q8CMY4	155	K	Probable malate:quinone oxidoreductase 4	mqo4
Cellular Component	GO:0098552	2	side of membrane	0.0130551	Q8CMY4	455	K	Probable malate:quinone oxidoreductase 4	mqo4
Cellular Component	GO:0098552	2	side of membrane	0.0130551	Q8CMY4	167	K	Probable malate:quinone oxidoreductase 4	mqo4
Cellular Component	GO:0098552	2	side of membrane	0.0130551	Q8CMY4	81	K	Probable malate:quinone oxidoreductase 4	mqo4
Cellular Component	GO:0098552	2	side of membrane	0.0130551	Q8CMY4	205	K	Probable malate:quinone oxidoreductase 4	mqo4
Cellular Component	GO:0098552	2	side of membrane	0.0130551	Q8CMY4	401	K	Probable malate:quinone oxidoreductase 4	mqo4
Cellular Component	GO:0098552	2	side of membrane	0.0130551	Q8CMY4	126	K	Probable malate:quinone oxidoreductase 4	mqo4
Cellular Component	GO:0098552	2	side of membrane	0.0130551	Q8CMY4	290	K	Probable malate:quinone oxidoreductase 4	mqo4
Cellular Component	GO:0098552	2	side of membrane	0.0130551	Q8CPK5	72	K	Cell division protein FtsA	ftsA
Cellular Component	GO:0098552	2	side of membrane	0.0130551	Q8CPK5	57	K	Cell division protein FtsA	ftsA
Cellular Component	GO:0098552	2	side of membrane	0.0130551	Q8CPK5	411	K	Cell division protein FtsA	ftsA
Cellular Component	GO:0098552	2	side of membrane	0.0130551	Q8CPK5	115	K	Cell division protein FtsA	ftsA
Cellular Component	GO:0098552	2	side of membrane	0.0130551	Q8CPK5	460	K	Cell division protein FtsA	ftsA
Cellular Component	GO:0098552	2	side of membrane	0.0130551	Q8CPK5	135	K	Cell division protein FtsA	ftsA
Cellular Component	GO:0098552	2	side of membrane	0.0130551	Q8CPP6	365	K	Probable quinol oxidase subunit 2	qoxA
Cellular Component	GO:0098552	2	side of membrane	0.0130551	Q8CPP6	304	K	Probable quinol oxidase subunit 2	qoxA
Cellular Component	GO:0098552	2	side of membrane	0.0130551	Q8CPP6	322	K	Probable quinol oxidase subunit 2	qoxA
Cellular Component	GO:0098552	2	side of membrane	0.0130551	Q8CPP6	308	K	Probable quinol oxidase subunit 2	qoxA
Cellular Component	GO:0098552	2	side of membrane	0.0130551	Q8CPP6	296	K	Probable quinol oxidase subunit 2	qoxA
Cellular Component	GO:0098552	2	side of membrane	0.0130551	Q8CPP6	349	K	Probable quinol oxidase subunit 2	qoxA
Cellular Component	GO:0098552	2	side of membrane	0.0130551	Q8CPP6	224	K	Probable quinol oxidase subunit 2	qoxA
Cellular Component	GO:0098552	2	side of membrane	0.0130551	Q8CPP6	284	K	Probable quinol oxidase subunit 2	qoxA
Cellular Component	GO:0098552	2	side of membrane	0.0130551	Q8CQE8	488	K	Probable malate:quinone oxidoreductase 3	mqo3
Cellular Component	GO:0098552	2	side of membrane	0.0130551	Q8CQE8	218	K	Probable malate:quinone oxidoreductase 3	mqo3
Cellular Component	GO:0098552	2	side of membrane	0.0130551	Q8CN91	401	K	Probable malate:quinone oxidoreductase 1	mqo1
Cellular Component	GO:0098552	2	side of membrane	0.0130551	Q8CN91	212	K	Probable malate:quinone oxidoreductase 1	mqo1
Cellular Component	GO:0098552	2	side of membrane	0.0130551	Q8CN91	33	K	Probable malate:quinone oxidoreductase 1	mqo1
Cellular Component	GO:0098552	2	side of membrane	0.0130551	Q8CN91	286	K	Probable malate:quinone oxidoreductase 1	mqo1
Cellular Component	GO:0098552	2	side of membrane	0.0130551	Q8CN91	486	K	Probable malate:quinone oxidoreductase 1	mqo1
Cellular Component	GO:0098552	2	side of membrane	0.0130551	Q8CN91	461	K	Probable malate:quinone oxidoreductase 1	mqo1
Cellular Component	GO:0098552	2	side of membrane	0.0130551	Q8CN91	275	K	Probable malate:quinone oxidoreductase 1	mqo1
Cellular Component	GO:0005840	5	ribosome	1.00119e-14	P66175	22	K	50S ribosomal protein L29	rpmC
Cellular Component	GO:0005840	5	ribosome	1.00119e-14	Q8CS87	99	K	50S ribosomal protein L21	rplU
Cellular Component	GO:0005840	5	ribosome	1.00119e-14	Q8CS87	70	K	50S ribosomal protein L21	rplU
Cellular Component	GO:0005840	5	ribosome	1.00119e-14	Q8CRG4	81	K	30S ribosomal protein S19	rpsS
Cellular Component	GO:0005840	5	ribosome	1.00119e-14	Q8CRG4	27	K	30S ribosomal protein S19	rpsS
Cellular Component	GO:0005840	5	ribosome	1.00119e-14	Q8CRG4	88	K	30S ribosomal protein S19	rpsS
Cellular Component	GO:0005840	5	ribosome	1.00119e-14	Q8CRG4	18	K	30S ribosomal protein S19	rpsS
Cellular Component	GO:0005840	5	ribosome	1.00119e-14	Q8CRG4	56	K	30S ribosomal protein S19	rpsS
Cellular Component	GO:0005840	5	ribosome	1.00119e-14	Q8CRG4	7	K	30S ribosomal protein S19	rpsS
Cellular Component	GO:0005840	5	ribosome	1.00119e-14	Q8CRG4	17	K	30S ribosomal protein S19	rpsS
Cellular Component	GO:0005840	5	ribosome	1.00119e-14	Q8CRH5	158	K	50S ribosomal protein L6	rplF
Cellular Component	GO:0005840	5	ribosome	1.00119e-14	Q8CRH5	59	K	50S ribosomal protein L6	rplF
Cellular Component	GO:0005840	5	ribosome	1.00119e-14	Q8CRH5	44	K	50S ribosomal protein L6	rplF
Cellular Component	GO:0005840	5	ribosome	1.00119e-14	Q8CST2	13	K	30S ribosomal protein S15	rpsO
Cellular Component	GO:0005840	5	ribosome	1.00119e-14	Q8CRG5	27	K	50S ribosomal protein L22	rplV
Cellular Component	GO:0005840	5	ribosome	1.00119e-14	Q8CRG5	98	K	50S ribosomal protein L22	rplV
Cellular Component	GO:0005840	5	ribosome	1.00119e-14	Q8CRG5	83	K	50S ribosomal protein L22	rplV
Cellular Component	GO:0005840	5	ribosome	1.00119e-14	Q8CRG5	111	K	50S ribosomal protein L22	rplV
Cellular Component	GO:0005840	5	ribosome	1.00119e-14	Q8CRG7	124	K	50S ribosomal protein L16	rplP
Cellular Component	GO:0005840	5	ribosome	1.00119e-14	Q8CRG7	98	K	50S ribosomal protein L16	rplP
Cellular Component	GO:0005840	5	ribosome	1.00119e-14	Q8CRG0	205	K	50S ribosomal protein L3	rplC
Cellular Component	GO:0005840	5	ribosome	1.00119e-14	Q8CRG0	67	K	50S ribosomal protein L3	rplC
Cellular Component	GO:0005840	5	ribosome	1.00119e-14	Q8CRG0	39	K	50S ribosomal protein L3	rplC
Cellular Component	GO:0005840	5	ribosome	1.00119e-14	Q8CRG0	71	K	50S ribosomal protein L3	rplC
Cellular Component	GO:0005840	5	ribosome	1.00119e-14	Q8CRG0	132	K	50S ribosomal protein L3	rplC
Cellular Component	GO:0005840	5	ribosome	1.00119e-14	Q8CRG0	125	K	50S ribosomal protein L3	rplC
Cellular Component	GO:0005840	5	ribosome	1.00119e-14	Q8CRG0	78	K	50S ribosomal protein L3	rplC
Cellular Component	GO:0005840	5	ribosome	1.00119e-14	Q8CRG0	79	K	50S ribosomal protein L3	rplC
Cellular Component	GO:0005840	5	ribosome	1.00119e-14	Q8CRJ0	7	K	30S ribosomal protein S9	rpsI
Cellular Component	GO:0005840	5	ribosome	1.00119e-14	Q8CS77	33	K	50S ribosomal protein L20	rplT
Cellular Component	GO:0005840	5	ribosome	1.00119e-14	Q8CS77	85	K	50S ribosomal protein L20	rplT
Cellular Component	GO:0005840	5	ribosome	1.00119e-14	Q8CS77	5	K	50S ribosomal protein L20	rplT
Cellular Component	GO:0005840	5	ribosome	1.00119e-14	Q8CRG8	18	K	30S ribosomal protein S17	rpsQ
Cellular Component	GO:0005840	5	ribosome	1.00119e-14	Q8CRG8	73	K	30S ribosomal protein S17	rpsQ
Cellular Component	GO:0005840	5	ribosome	1.00119e-14	Q8CRG8	47	K	30S ribosomal protein S17	rpsQ
Cellular Component	GO:0005840	5	ribosome	1.00119e-14	Q8CRH1	84	K	50S ribosomal protein L24	rplX
Cellular Component	GO:0005840	5	ribosome	1.00119e-14	Q8CRH1	42	K	50S ribosomal protein L24	rplX
Cellular Component	GO:0005840	5	ribosome	1.00119e-14	Q8CRH1	102	K	50S ribosomal protein L24	rplX
Cellular Component	GO:0005840	5	ribosome	1.00119e-14	Q8CRH1	96	K	50S ribosomal protein L24	rplX
Cellular Component	GO:0005840	5	ribosome	1.00119e-14	Q8CRH1	29	K	50S ribosomal protein L24	rplX
Cellular Component	GO:0005840	5	ribosome	1.00119e-14	Q8CRM8	63	K	50S ribosomal protein L31 type B	rpmE2
Cellular Component	GO:0005840	5	ribosome	1.00119e-14	Q8CRM8	2	K	50S ribosomal protein L31 type B	rpmE2
Cellular Component	GO:0005840	5	ribosome	1.00119e-14	P66255	10	K	50S ribosomal protein L34	rpmH
Cellular Component	GO:0005840	5	ribosome	1.00119e-14	Q8CRH8	21	K	50S ribosomal protein L30	rpmD
Cellular Component	GO:0005840	5	ribosome	1.00119e-14	Q8CRH8	30	K	50S ribosomal protein L30	rpmD
Cellular Component	GO:0005840	5	ribosome	1.00119e-14	Q8CRH8	51	K	50S ribosomal protein L30	rpmD
Cellular Component	GO:0005840	5	ribosome	1.00119e-14	Q8CRH8	29	K	50S ribosomal protein L30	rpmD
Cellular Component	GO:0005840	5	ribosome	1.00119e-14	Q8CSZ2	37	K	50S ribosomal protein L32	rpmF
Cellular Component	GO:0005840	5	ribosome	1.00119e-14	Q8CRI2	8	K	50S ribosomal protein L36	rpmJ
Cellular Component	GO:0005840	5	ribosome	1.00119e-14	Q8CSE3	41	K	50S ribosomal protein L33 1	rpmG1
Cellular Component	GO:0005840	5	ribosome	1.00119e-14	Q8CTF2	61	K	Ribosome hibernation promotion factor	hpf
Cellular Component	GO:0005840	5	ribosome	1.00119e-14	Q8CRG6	134	K	30S ribosomal protein S3	rpsC
Cellular Component	GO:0005840	5	ribosome	1.00119e-14	Q8CRG6	40	K	30S ribosomal protein S3	rpsC
Cellular Component	GO:0005840	5	ribosome	1.00119e-14	Q8CRG6	97	K	30S ribosomal protein S3	rpsC
Cellular Component	GO:0005840	5	ribosome	1.00119e-14	Q8CRG6	26	K	30S ribosomal protein S3	rpsC
Cellular Component	GO:0005840	5	ribosome	1.00119e-14	Q8CRG6	107	K	30S ribosomal protein S3	rpsC
Cellular Component	GO:0005840	5	ribosome	1.00119e-14	Q8CRG6	47	K	30S ribosomal protein S3	rpsC
Cellular Component	GO:0005840	5	ribosome	1.00119e-14	Q8CRG6	106	K	30S ribosomal protein S3	rpsC
Cellular Component	GO:0005840	5	ribosome	1.00119e-14	Q8CRG6	89	K	30S ribosomal protein S3	rpsC
Cellular Component	GO:0005840	5	ribosome	1.00119e-14	Q8CRG6	96	K	30S ribosomal protein S3	rpsC
Cellular Component	GO:0005840	5	ribosome	1.00119e-14	Q8CQU8	42	K	50S ribosomal protein L25	rplY
Cellular Component	GO:0005840	5	ribosome	1.00119e-14	Q8CRI3	64	K	30S ribosomal protein S13	rpsM
Cellular Component	GO:0005840	5	ribosome	1.00119e-14	Q8CRI3	46	K	30S ribosomal protein S13	rpsM
Cellular Component	GO:0005840	5	ribosome	1.00119e-14	Q8CRI3	78	K	30S ribosomal protein S13	rpsM
Cellular Component	GO:0005840	5	ribosome	1.00119e-14	P66523	8	K	30S ribosomal protein S21	rpsU
Cellular Component	GO:0005840	5	ribosome	1.00119e-14	P66523	40	K	30S ribosomal protein S21	rpsU
Cellular Component	GO:0005840	5	ribosome	1.00119e-14	P66336	11	K	30S ribosomal protein S10	rpsJ
Cellular Component	GO:0005840	5	ribosome	1.00119e-14	P66336	57	K	30S ribosomal protein S10	rpsJ
Cellular Component	GO:0005840	5	ribosome	1.00119e-14	P66336	30	K	30S ribosomal protein S10	rpsJ
Cellular Component	GO:0005840	5	ribosome	1.00119e-14	P66336	24	K	30S ribosomal protein S10	rpsJ
Cellular Component	GO:0005840	5	ribosome	1.00119e-14	Q8CRH7	159	K	30S ribosomal protein S5	rpsE
Cellular Component	GO:0005840	5	ribosome	1.00119e-14	Q8CRH7	69	K	30S ribosomal protein S5	rpsE
Cellular Component	GO:0005840	5	ribosome	1.00119e-14	Q8CRH7	97	K	30S ribosomal protein S5	rpsE
Cellular Component	GO:0005840	5	ribosome	1.00119e-14	Q8CRH7	61	K	30S ribosomal protein S5	rpsE
Cellular Component	GO:0005840	5	ribosome	1.00119e-14	Q8CRH7	9	K	30S ribosomal protein S5	rpsE
Cellular Component	GO:0005840	5	ribosome	1.00119e-14	Q8CRI5	52	K	50S ribosomal protein L17	rplQ
Cellular Component	GO:0005840	5	ribosome	1.00119e-14	Q8CRI5	53	K	50S ribosomal protein L17	rplQ
Cellular Component	GO:0005840	5	ribosome	1.00119e-14	Q8CRI5	64	K	50S ribosomal protein L17	rplQ
Cellular Component	GO:0005840	5	ribosome	1.00119e-14	Q8CRI5	46	K	50S ribosomal protein L17	rplQ
Cellular Component	GO:0005840	5	ribosome	1.00119e-14	Q8CRI5	105	K	50S ribosomal protein L17	rplQ
Cellular Component	GO:0005840	5	ribosome	1.00119e-14	Q8CSV0	88	K	30S ribosomal protein S16	rpsP
Cellular Component	GO:0005840	5	ribosome	1.00119e-14	Q8CSV0	66	K	30S ribosomal protein S16	rpsP
Cellular Component	GO:0005840	5	ribosome	1.00119e-14	Q8CSC6	70	K	30S ribosomal protein S20	rpsT
Cellular Component	GO:0005840	5	ribosome	1.00119e-14	Q8CSC6	46	K	30S ribosomal protein S20	rpsT
Cellular Component	GO:0005840	5	ribosome	1.00119e-14	Q8CSC6	55	K	30S ribosomal protein S20	rpsT
Cellular Component	GO:0005840	5	ribosome	1.00119e-14	Q8CRH2	119	K	50S ribosomal protein L5	rplE
Cellular Component	GO:0005840	5	ribosome	1.00119e-14	Q8CRH2	18	K	50S ribosomal protein L5	rplE
Cellular Component	GO:0005840	5	ribosome	1.00119e-14	Q8CRH2	72	K	50S ribosomal protein L5	rplE
Cellular Component	GO:0005840	5	ribosome	1.00119e-14	Q8CRH2	7	K	50S ribosomal protein L5	rplE
Cellular Component	GO:0005840	5	ribosome	1.00119e-14	Q8CRH2	19	K	50S ribosomal protein L5	rplE
Cellular Component	GO:0005840	5	ribosome	1.00119e-14	Q8CSP9	41	K	50S ribosomal protein L33 2	rpmG2
Cellular Component	GO:0005840	5	ribosome	1.00119e-14	Q8CS54	28	K	30S ribosomal protein S4	rpsD
Cellular Component	GO:0005840	5	ribosome	1.00119e-14	Q8CS54	134	K	30S ribosomal protein S4	rpsD
Cellular Component	GO:0005840	5	ribosome	1.00119e-14	Q8CS54	144	K	30S ribosomal protein S4	rpsD
Cellular Component	GO:0005840	5	ribosome	1.00119e-14	Q8CTT2	53	K	50S ribosomal protein L10	rplJ
Cellular Component	GO:0005840	5	ribosome	1.00119e-14	Q8CTT2	56	K	50S ribosomal protein L10	rplJ
Cellular Component	GO:0005840	5	ribosome	1.00119e-14	Q8CTT2	101	K	50S ribosomal protein L10	rplJ
Cellular Component	GO:0005840	5	ribosome	1.00119e-14	Q8CTT2	9	K	50S ribosomal protein L10	rplJ
Cellular Component	GO:0005840	5	ribosome	1.00119e-14	Q8CTT5	81	K	50S ribosomal protein L11	rplK
Cellular Component	GO:0005840	5	ribosome	1.00119e-14	Q8CTT5	80	K	50S ribosomal protein L11	rplK
Cellular Component	GO:0005840	5	ribosome	1.00119e-14	Q8CRG2	74	K	50S ribosomal protein L23	rplW
Cellular Component	GO:0005840	5	ribosome	1.00119e-14	Q8CRG2	59	K	50S ribosomal protein L23	rplW
Cellular Component	GO:0005840	5	ribosome	1.00119e-14	Q8CRG2	8	K	50S ribosomal protein L23	rplW
Cellular Component	GO:0005840	5	ribosome	1.00119e-14	Q8CRG2	83	K	50S ribosomal protein L23	rplW
Cellular Component	GO:0005840	5	ribosome	1.00119e-14	Q8CRG2	24	K	50S ribosomal protein L23	rplW
Cellular Component	GO:0005840	5	ribosome	1.00119e-14	P66618	35	K	30S ribosomal protein S7	rpsG
Cellular Component	GO:0005840	5	ribosome	1.00119e-14	P66618	25	K	30S ribosomal protein S7	rpsG
Cellular Component	GO:0005840	5	ribosome	1.00119e-14	Q8CSU2	81	K	30S ribosomal protein S2	rpsB
Cellular Component	GO:0005840	5	ribosome	1.00119e-14	Q8CSU2	74	K	30S ribosomal protein S2	rpsB
Cellular Component	GO:0005840	5	ribosome	1.00119e-14	Q8CSU2	49	K	30S ribosomal protein S2	rpsB
Cellular Component	GO:0005840	5	ribosome	1.00119e-14	Q8CSU2	138	K	30S ribosomal protein S2	rpsB
Cellular Component	GO:0005840	5	ribosome	1.00119e-14	Q8CSU2	132	K	30S ribosomal protein S2	rpsB
Cellular Component	GO:0005840	5	ribosome	1.00119e-14	Q8CSU2	73	K	30S ribosomal protein S2	rpsB
Cellular Component	GO:0005840	5	ribosome	1.00119e-14	Q8CSU2	29	K	30S ribosomal protein S2	rpsB
Cellular Component	GO:0005840	5	ribosome	1.00119e-14	Q8CRG9	53	K	50S ribosomal protein L14	rplN
Cellular Component	GO:0005840	5	ribosome	1.00119e-14	Q8CRG9	9	K	50S ribosomal protein L14	rplN
Cellular Component	GO:0005840	5	ribosome	1.00119e-14	Q8CRH4	33	K	30S ribosomal protein S8	rpsH
Cellular Component	GO:0005840	5	ribosome	1.00119e-14	Q8CRH4	90	K	30S ribosomal protein S8	rpsH
Cellular Component	GO:0005840	5	ribosome	1.00119e-14	Q8CRH4	78	K	30S ribosomal protein S8	rpsH
Cellular Component	GO:0005840	5	ribosome	1.00119e-14	Q8CRH4	41	K	30S ribosomal protein S8	rpsH
Cellular Component	GO:0005840	5	ribosome	1.00119e-14	Q8CRH4	34	K	30S ribosomal protein S8	rpsH
Cellular Component	GO:0005840	5	ribosome	1.00119e-14	Q8CRH4	56	K	30S ribosomal protein S8	rpsH
Cellular Component	GO:0005840	5	ribosome	1.00119e-14	Q8CRH4	24	K	30S ribosomal protein S8	rpsH
Cellular Component	GO:0005840	5	ribosome	1.00119e-14	Q8CRH4	65	K	30S ribosomal protein S8	rpsH
Cellular Component	GO:0005840	5	ribosome	1.00119e-14	Q8CRH4	82	K	30S ribosomal protein S8	rpsH
Cellular Component	GO:0005840	5	ribosome	1.00119e-14	Q8CSU9	85	K	50S ribosomal protein L19	rplS
Cellular Component	GO:0005840	5	ribosome	1.00119e-14	Q8CSU9	65	K	50S ribosomal protein L19	rplS
Cellular Component	GO:0005840	5	ribosome	1.00119e-14	Q8CRH6	38	K	50S ribosomal protein L18	rplR
Cellular Component	GO:0005840	5	ribosome	1.00119e-14	Q8CRH6	28	K	50S ribosomal protein L18	rplR
Cellular Component	GO:0005840	5	ribosome	1.00119e-14	Q8CRH6	21	K	50S ribosomal protein L18	rplR
Cellular Component	GO:0005840	5	ribosome	1.00119e-14	Q8CRH6	83	K	50S ribosomal protein L18	rplR
Cellular Component	GO:0005840	5	ribosome	1.00119e-14	Q8CRH6	61	K	50S ribosomal protein L18	rplR
Cellular Component	GO:0005840	5	ribosome	1.00119e-14	Q8CRH6	107	K	50S ribosomal protein L18	rplR
Cellular Component	GO:0005840	5	ribosome	1.00119e-14	Q8CTS8	101	K	30S ribosomal protein S12	rpsL
Cellular Component	GO:0005840	5	ribosome	1.00119e-14	Q8CTS8	43	K	30S ribosomal protein S12	rpsL
Cellular Component	GO:0005840	5	ribosome	1.00119e-14	Q8CTS8	17	K	30S ribosomal protein S12	rpsL
Cellular Component	GO:0005840	5	ribosome	1.00119e-14	Q8CQP4	19	K	30S ribosomal protein S6	rpsF
Cellular Component	GO:0005840	5	ribosome	1.00119e-14	Q8CQP6	35	K	30S ribosomal protein S18	rpsR
Cellular Component	GO:0005840	5	ribosome	1.00119e-14	Q8CQP6	77	K	30S ribosomal protein S18	rpsR
Cellular Component	GO:0005840	5	ribosome	1.00119e-14	Q8CQP6	65	K	30S ribosomal protein S18	rpsR
Cellular Component	GO:0005840	5	ribosome	1.00119e-14	Q8CQP6	55	K	30S ribosomal protein S18	rpsR
Cellular Component	GO:0005840	5	ribosome	1.00119e-14	Q8CS89	76	K	50S ribosomal protein L27	rpmA
Cellular Component	GO:0005840	5	ribosome	1.00119e-14	Q8CS76	65	K	50S ribosomal protein L35	rpmI
Cellular Component	GO:0005840	5	ribosome	1.00119e-14	Q8CRI9	69	K	50S ribosomal protein L13	rplM
Cellular Component	GO:0005840	5	ribosome	1.00119e-14	Q8CRI9	94	K	50S ribosomal protein L13	rplM
Cellular Component	GO:0005840	5	ribosome	1.00119e-14	Q8CRI9	122	K	50S ribosomal protein L13	rplM
Cellular Component	GO:0005840	5	ribosome	1.00119e-14	Q8CRI9	15	K	50S ribosomal protein L13	rplM
Cellular Component	GO:0005840	5	ribosome	1.00119e-14	Q8CRG1	52	K	50S ribosomal protein L4	rplD
Cellular Component	GO:0005840	5	ribosome	1.00119e-14	Q8CRG1	201	K	50S ribosomal protein L4	rplD
Cellular Component	GO:0005840	5	ribosome	1.00119e-14	Q8CRG1	140	K	50S ribosomal protein L4	rplD
Cellular Component	GO:0005840	5	ribosome	1.00119e-14	Q8CRG1	150	K	50S ribosomal protein L4	rplD
Cellular Component	GO:0005840	5	ribosome	1.00119e-14	Q8CRG3	252	K	50S ribosomal protein L2	rplB
Cellular Component	GO:0005840	5	ribosome	1.00119e-14	Q8CRG3	71	K	50S ribosomal protein L2	rplB
Cellular Component	GO:0005840	5	ribosome	1.00119e-14	Q8CRG3	7	K	50S ribosomal protein L2	rplB
Cellular Component	GO:0005840	5	ribosome	1.00119e-14	Q8CRG3	268	K	50S ribosomal protein L2	rplB
Cellular Component	GO:0005840	5	ribosome	1.00119e-14	Q8CRG3	31	K	50S ribosomal protein L2	rplB
Cellular Component	GO:0005840	5	ribosome	1.00119e-14	Q8CTT4	151	K	50S ribosomal protein L1	rplA
Cellular Component	GO:0005840	5	ribosome	1.00119e-14	Q8CTT4	7	K	50S ribosomal protein L1	rplA
Cellular Component	GO:0005840	5	ribosome	1.00119e-14	Q8CTT4	230	K	50S ribosomal protein L1	rplA
Cellular Component	GO:0005840	5	ribosome	1.00119e-14	Q8CTT4	160	K	50S ribosomal protein L1	rplA
Cellular Component	GO:0005840	5	ribosome	1.00119e-14	Q8CTT4	150	K	50S ribosomal protein L1	rplA
Cellular Component	GO:0005840	5	ribosome	1.00119e-14	Q8CTT4	54	K	50S ribosomal protein L1	rplA
Cellular Component	GO:0005840	5	ribosome	1.00119e-14	Q8CTT4	14	K	50S ribosomal protein L1	rplA
Cellular Component	GO:0005840	5	ribosome	1.00119e-14	Q8CU90	109	K	50S ribosomal protein L9	rplI
Cellular Component	GO:0005840	5	ribosome	1.00119e-14	Q8CU90	69	K	50S ribosomal protein L9	rplI
Cellular Component	GO:0005840	5	ribosome	1.00119e-14	Q8CU90	52	K	50S ribosomal protein L9	rplI
Cellular Component	GO:0005840	5	ribosome	1.00119e-14	Q8CU90	103	K	50S ribosomal protein L9	rplI
Cellular Component	GO:0005840	5	ribosome	1.00119e-14	Q8CU90	34	K	50S ribosomal protein L9	rplI
Cellular Component	GO:0005840	5	ribosome	1.00119e-14	Q8CU90	73	K	50S ribosomal protein L9	rplI
Cellular Component	GO:0005840	5	ribosome	1.00119e-14	Q8CRH9	124	K	50S ribosomal protein L15	rplO
Cellular Component	GO:0005840	5	ribosome	1.00119e-14	Q8CRH9	119	K	50S ribosomal protein L15	rplO
Cellular Component	GO:0005840	5	ribosome	1.00119e-14	Q8CRH9	106	K	50S ribosomal protein L15	rplO
Cellular Component	GO:0005840	5	ribosome	1.00119e-14	Q8CRH9	7	K	50S ribosomal protein L15	rplO
Cellular Component	GO:0005840	5	ribosome	1.00119e-14	Q8CRH9	2	K	50S ribosomal protein L15	rplO
Cellular Component	GO:0032300	3	mismatch repair complex	0.107139	Q8CPF0	182	K	DNA mismatch repair protein MutS	mutS
Cellular Component	GO:0032300	3	mismatch repair complex	0.107139	Q8CPL6	298	K	Endonuclease MutS2	mutS2
Cellular Component	GO:0032300	3	mismatch repair complex	0.107139	Q8CPL6	614	K	Endonuclease MutS2	mutS2
Cellular Component	GO:0032300	3	mismatch repair complex	0.107139	Q8CPE9	134	K	DNA mismatch repair protein MutL	mutL
Cellular Component	GO:0032300	3	mismatch repair complex	0.107139	Q8CPE9	489	K	DNA mismatch repair protein MutL	mutL
Cellular Component	GO:0009328	3	phenylalanine-tRNA ligase complex	0.226043	Q8CSY8	793	K	Phenylalanine--tRNA ligase beta subunit	pheT
Cellular Component	GO:0009328	3	phenylalanine-tRNA ligase complex	0.226043	A0A0H2VJ45	103	K	Phenylalanyl-tRNA synthetase (Beta subunit)	SE_1415
Cellular Component	GO:0009328	3	phenylalanine-tRNA ligase complex	0.226043	A0A0H2VJ45	37	K	Phenylalanyl-tRNA synthetase (Beta subunit)	SE_1415
Cellular Component	GO:1990391	2	DNA repair complex	0.276527	Q8CPF0	182	K	DNA mismatch repair protein MutS	mutS
Cellular Component	GO:1990391	2	DNA repair complex	0.276527	Q8CPL6	298	K	Endonuclease MutS2	mutS2
Cellular Component	GO:1990391	2	DNA repair complex	0.276527	Q8CPL6	614	K	Endonuclease MutS2	mutS2
Cellular Component	GO:1990391	2	DNA repair complex	0.276527	Q8CPE9	134	K	DNA mismatch repair protein MutL	mutL
Cellular Component	GO:1990391	2	DNA repair complex	0.276527	Q8CPE9	489	K	DNA mismatch repair protein MutL	mutL
Cellular Component	GO:0015934	4	large ribosomal subunit	1.63484e-11	P66175	22	K	50S ribosomal protein L29	rpmC
Cellular Component	GO:0015934	4	large ribosomal subunit	1.63484e-11	Q8CS87	99	K	50S ribosomal protein L21	rplU
Cellular Component	GO:0015934	4	large ribosomal subunit	1.63484e-11	Q8CS87	70	K	50S ribosomal protein L21	rplU
Cellular Component	GO:0015934	4	large ribosomal subunit	1.63484e-11	Q8CRH5	158	K	50S ribosomal protein L6	rplF
Cellular Component	GO:0015934	4	large ribosomal subunit	1.63484e-11	Q8CRH5	59	K	50S ribosomal protein L6	rplF
Cellular Component	GO:0015934	4	large ribosomal subunit	1.63484e-11	Q8CRH5	44	K	50S ribosomal protein L6	rplF
Cellular Component	GO:0015934	4	large ribosomal subunit	1.63484e-11	Q8CRG5	27	K	50S ribosomal protein L22	rplV
Cellular Component	GO:0015934	4	large ribosomal subunit	1.63484e-11	Q8CRG5	98	K	50S ribosomal protein L22	rplV
Cellular Component	GO:0015934	4	large ribosomal subunit	1.63484e-11	Q8CRG5	83	K	50S ribosomal protein L22	rplV
Cellular Component	GO:0015934	4	large ribosomal subunit	1.63484e-11	Q8CRG5	111	K	50S ribosomal protein L22	rplV
Cellular Component	GO:0015934	4	large ribosomal subunit	1.63484e-11	Q8CRG7	124	K	50S ribosomal protein L16	rplP
Cellular Component	GO:0015934	4	large ribosomal subunit	1.63484e-11	Q8CRG7	98	K	50S ribosomal protein L16	rplP
Cellular Component	GO:0015934	4	large ribosomal subunit	1.63484e-11	Q8CRG0	205	K	50S ribosomal protein L3	rplC
Cellular Component	GO:0015934	4	large ribosomal subunit	1.63484e-11	Q8CRG0	67	K	50S ribosomal protein L3	rplC
Cellular Component	GO:0015934	4	large ribosomal subunit	1.63484e-11	Q8CRG0	39	K	50S ribosomal protein L3	rplC
Cellular Component	GO:0015934	4	large ribosomal subunit	1.63484e-11	Q8CRG0	71	K	50S ribosomal protein L3	rplC
Cellular Component	GO:0015934	4	large ribosomal subunit	1.63484e-11	Q8CRG0	132	K	50S ribosomal protein L3	rplC
Cellular Component	GO:0015934	4	large ribosomal subunit	1.63484e-11	Q8CRG0	125	K	50S ribosomal protein L3	rplC
Cellular Component	GO:0015934	4	large ribosomal subunit	1.63484e-11	Q8CRG0	78	K	50S ribosomal protein L3	rplC
Cellular Component	GO:0015934	4	large ribosomal subunit	1.63484e-11	Q8CRG0	79	K	50S ribosomal protein L3	rplC
Cellular Component	GO:0015934	4	large ribosomal subunit	1.63484e-11	Q8CS77	33	K	50S ribosomal protein L20	rplT
Cellular Component	GO:0015934	4	large ribosomal subunit	1.63484e-11	Q8CS77	85	K	50S ribosomal protein L20	rplT
Cellular Component	GO:0015934	4	large ribosomal subunit	1.63484e-11	Q8CS77	5	K	50S ribosomal protein L20	rplT
Cellular Component	GO:0015934	4	large ribosomal subunit	1.63484e-11	Q8CRH1	84	K	50S ribosomal protein L24	rplX
Cellular Component	GO:0015934	4	large ribosomal subunit	1.63484e-11	Q8CRH1	42	K	50S ribosomal protein L24	rplX
Cellular Component	GO:0015934	4	large ribosomal subunit	1.63484e-11	Q8CRH1	102	K	50S ribosomal protein L24	rplX
Cellular Component	GO:0015934	4	large ribosomal subunit	1.63484e-11	Q8CRH1	96	K	50S ribosomal protein L24	rplX
Cellular Component	GO:0015934	4	large ribosomal subunit	1.63484e-11	Q8CRH1	29	K	50S ribosomal protein L24	rplX
Cellular Component	GO:0015934	4	large ribosomal subunit	1.63484e-11	Q8CRM8	63	K	50S ribosomal protein L31 type B	rpmE2
Cellular Component	GO:0015934	4	large ribosomal subunit	1.63484e-11	Q8CRM8	2	K	50S ribosomal protein L31 type B	rpmE2
Cellular Component	GO:0015934	4	large ribosomal subunit	1.63484e-11	P66255	10	K	50S ribosomal protein L34	rpmH
Cellular Component	GO:0015934	4	large ribosomal subunit	1.63484e-11	Q8CRH8	21	K	50S ribosomal protein L30	rpmD
Cellular Component	GO:0015934	4	large ribosomal subunit	1.63484e-11	Q8CRH8	30	K	50S ribosomal protein L30	rpmD
Cellular Component	GO:0015934	4	large ribosomal subunit	1.63484e-11	Q8CRH8	51	K	50S ribosomal protein L30	rpmD
Cellular Component	GO:0015934	4	large ribosomal subunit	1.63484e-11	Q8CRH8	29	K	50S ribosomal protein L30	rpmD
Cellular Component	GO:0015934	4	large ribosomal subunit	1.63484e-11	Q8CSZ2	37	K	50S ribosomal protein L32	rpmF
Cellular Component	GO:0015934	4	large ribosomal subunit	1.63484e-11	Q8CRI2	8	K	50S ribosomal protein L36	rpmJ
Cellular Component	GO:0015934	4	large ribosomal subunit	1.63484e-11	Q8CSE3	41	K	50S ribosomal protein L33 1	rpmG1
Cellular Component	GO:0015934	4	large ribosomal subunit	1.63484e-11	Q8CQU8	42	K	50S ribosomal protein L25	rplY
Cellular Component	GO:0015934	4	large ribosomal subunit	1.63484e-11	Q8CRI5	52	K	50S ribosomal protein L17	rplQ
Cellular Component	GO:0015934	4	large ribosomal subunit	1.63484e-11	Q8CRI5	53	K	50S ribosomal protein L17	rplQ
Cellular Component	GO:0015934	4	large ribosomal subunit	1.63484e-11	Q8CRI5	64	K	50S ribosomal protein L17	rplQ
Cellular Component	GO:0015934	4	large ribosomal subunit	1.63484e-11	Q8CRI5	46	K	50S ribosomal protein L17	rplQ
Cellular Component	GO:0015934	4	large ribosomal subunit	1.63484e-11	Q8CRI5	105	K	50S ribosomal protein L17	rplQ
Cellular Component	GO:0015934	4	large ribosomal subunit	1.63484e-11	Q8CRH2	119	K	50S ribosomal protein L5	rplE
Cellular Component	GO:0015934	4	large ribosomal subunit	1.63484e-11	Q8CRH2	18	K	50S ribosomal protein L5	rplE
Cellular Component	GO:0015934	4	large ribosomal subunit	1.63484e-11	Q8CRH2	72	K	50S ribosomal protein L5	rplE
Cellular Component	GO:0015934	4	large ribosomal subunit	1.63484e-11	Q8CRH2	7	K	50S ribosomal protein L5	rplE
Cellular Component	GO:0015934	4	large ribosomal subunit	1.63484e-11	Q8CRH2	19	K	50S ribosomal protein L5	rplE
Cellular Component	GO:0015934	4	large ribosomal subunit	1.63484e-11	Q8CSP9	41	K	50S ribosomal protein L33 2	rpmG2
Cellular Component	GO:0015934	4	large ribosomal subunit	1.63484e-11	Q8CTT2	53	K	50S ribosomal protein L10	rplJ
Cellular Component	GO:0015934	4	large ribosomal subunit	1.63484e-11	Q8CTT2	56	K	50S ribosomal protein L10	rplJ
Cellular Component	GO:0015934	4	large ribosomal subunit	1.63484e-11	Q8CTT2	101	K	50S ribosomal protein L10	rplJ
Cellular Component	GO:0015934	4	large ribosomal subunit	1.63484e-11	Q8CTT2	9	K	50S ribosomal protein L10	rplJ
Cellular Component	GO:0015934	4	large ribosomal subunit	1.63484e-11	Q8CTT5	81	K	50S ribosomal protein L11	rplK
Cellular Component	GO:0015934	4	large ribosomal subunit	1.63484e-11	Q8CTT5	80	K	50S ribosomal protein L11	rplK
Cellular Component	GO:0015934	4	large ribosomal subunit	1.63484e-11	Q8CRG2	74	K	50S ribosomal protein L23	rplW
Cellular Component	GO:0015934	4	large ribosomal subunit	1.63484e-11	Q8CRG2	59	K	50S ribosomal protein L23	rplW
Cellular Component	GO:0015934	4	large ribosomal subunit	1.63484e-11	Q8CRG2	8	K	50S ribosomal protein L23	rplW
Cellular Component	GO:0015934	4	large ribosomal subunit	1.63484e-11	Q8CRG2	83	K	50S ribosomal protein L23	rplW
Cellular Component	GO:0015934	4	large ribosomal subunit	1.63484e-11	Q8CRG2	24	K	50S ribosomal protein L23	rplW
Cellular Component	GO:0015934	4	large ribosomal subunit	1.63484e-11	Q8CRG9	53	K	50S ribosomal protein L14	rplN
Cellular Component	GO:0015934	4	large ribosomal subunit	1.63484e-11	Q8CRG9	9	K	50S ribosomal protein L14	rplN
Cellular Component	GO:0015934	4	large ribosomal subunit	1.63484e-11	Q8CSU9	85	K	50S ribosomal protein L19	rplS
Cellular Component	GO:0015934	4	large ribosomal subunit	1.63484e-11	Q8CSU9	65	K	50S ribosomal protein L19	rplS
Cellular Component	GO:0015934	4	large ribosomal subunit	1.63484e-11	Q8CRH6	38	K	50S ribosomal protein L18	rplR
Cellular Component	GO:0015934	4	large ribosomal subunit	1.63484e-11	Q8CRH6	28	K	50S ribosomal protein L18	rplR
Cellular Component	GO:0015934	4	large ribosomal subunit	1.63484e-11	Q8CRH6	21	K	50S ribosomal protein L18	rplR
Cellular Component	GO:0015934	4	large ribosomal subunit	1.63484e-11	Q8CRH6	83	K	50S ribosomal protein L18	rplR
Cellular Component	GO:0015934	4	large ribosomal subunit	1.63484e-11	Q8CRH6	61	K	50S ribosomal protein L18	rplR
Cellular Component	GO:0015934	4	large ribosomal subunit	1.63484e-11	Q8CRH6	107	K	50S ribosomal protein L18	rplR
Cellular Component	GO:0015934	4	large ribosomal subunit	1.63484e-11	Q8CS89	76	K	50S ribosomal protein L27	rpmA
Cellular Component	GO:0015934	4	large ribosomal subunit	1.63484e-11	Q8CS76	65	K	50S ribosomal protein L35	rpmI
Cellular Component	GO:0015934	4	large ribosomal subunit	1.63484e-11	Q8CRI9	69	K	50S ribosomal protein L13	rplM
Cellular Component	GO:0015934	4	large ribosomal subunit	1.63484e-11	Q8CRI9	94	K	50S ribosomal protein L13	rplM
Cellular Component	GO:0015934	4	large ribosomal subunit	1.63484e-11	Q8CRI9	122	K	50S ribosomal protein L13	rplM
Cellular Component	GO:0015934	4	large ribosomal subunit	1.63484e-11	Q8CRI9	15	K	50S ribosomal protein L13	rplM
Cellular Component	GO:0015934	4	large ribosomal subunit	1.63484e-11	Q8CRG1	52	K	50S ribosomal protein L4	rplD
Cellular Component	GO:0015934	4	large ribosomal subunit	1.63484e-11	Q8CRG1	201	K	50S ribosomal protein L4	rplD
Cellular Component	GO:0015934	4	large ribosomal subunit	1.63484e-11	Q8CRG1	140	K	50S ribosomal protein L4	rplD
Cellular Component	GO:0015934	4	large ribosomal subunit	1.63484e-11	Q8CRG1	150	K	50S ribosomal protein L4	rplD
Cellular Component	GO:0015934	4	large ribosomal subunit	1.63484e-11	Q8CRG3	252	K	50S ribosomal protein L2	rplB
Cellular Component	GO:0015934	4	large ribosomal subunit	1.63484e-11	Q8CRG3	71	K	50S ribosomal protein L2	rplB
Cellular Component	GO:0015934	4	large ribosomal subunit	1.63484e-11	Q8CRG3	7	K	50S ribosomal protein L2	rplB
Cellular Component	GO:0015934	4	large ribosomal subunit	1.63484e-11	Q8CRG3	268	K	50S ribosomal protein L2	rplB
Cellular Component	GO:0015934	4	large ribosomal subunit	1.63484e-11	Q8CRG3	31	K	50S ribosomal protein L2	rplB
Cellular Component	GO:0015934	4	large ribosomal subunit	1.63484e-11	Q8CTT4	151	K	50S ribosomal protein L1	rplA
Cellular Component	GO:0015934	4	large ribosomal subunit	1.63484e-11	Q8CTT4	7	K	50S ribosomal protein L1	rplA
Cellular Component	GO:0015934	4	large ribosomal subunit	1.63484e-11	Q8CTT4	230	K	50S ribosomal protein L1	rplA
Cellular Component	GO:0015934	4	large ribosomal subunit	1.63484e-11	Q8CTT4	160	K	50S ribosomal protein L1	rplA
Cellular Component	GO:0015934	4	large ribosomal subunit	1.63484e-11	Q8CTT4	150	K	50S ribosomal protein L1	rplA
Cellular Component	GO:0015934	4	large ribosomal subunit	1.63484e-11	Q8CTT4	54	K	50S ribosomal protein L1	rplA
Cellular Component	GO:0015934	4	large ribosomal subunit	1.63484e-11	Q8CTT4	14	K	50S ribosomal protein L1	rplA
Cellular Component	GO:0015934	4	large ribosomal subunit	1.63484e-11	Q8CU90	109	K	50S ribosomal protein L9	rplI
Cellular Component	GO:0015934	4	large ribosomal subunit	1.63484e-11	Q8CU90	69	K	50S ribosomal protein L9	rplI
Cellular Component	GO:0015934	4	large ribosomal subunit	1.63484e-11	Q8CU90	52	K	50S ribosomal protein L9	rplI
Cellular Component	GO:0015934	4	large ribosomal subunit	1.63484e-11	Q8CU90	103	K	50S ribosomal protein L9	rplI
Cellular Component	GO:0015934	4	large ribosomal subunit	1.63484e-11	Q8CU90	34	K	50S ribosomal protein L9	rplI
Cellular Component	GO:0015934	4	large ribosomal subunit	1.63484e-11	Q8CU90	73	K	50S ribosomal protein L9	rplI
Cellular Component	GO:0015934	4	large ribosomal subunit	1.63484e-11	Q8CRH9	124	K	50S ribosomal protein L15	rplO
Cellular Component	GO:0015934	4	large ribosomal subunit	1.63484e-11	Q8CRH9	119	K	50S ribosomal protein L15	rplO
Cellular Component	GO:0015934	4	large ribosomal subunit	1.63484e-11	Q8CRH9	106	K	50S ribosomal protein L15	rplO
Cellular Component	GO:0015934	4	large ribosomal subunit	1.63484e-11	Q8CRH9	7	K	50S ribosomal protein L15	rplO
Cellular Component	GO:0015934	4	large ribosomal subunit	1.63484e-11	Q8CRH9	2	K	50S ribosomal protein L15	rplO
Cellular Component	GO:1990204	3	oxidoreductase complex	0.0504718	A0A0H2VI31	161	K	Dihydrolipoyl dehydrogenase	SE_0794
Cellular Component	GO:1990204	3	oxidoreductase complex	0.0504718	A0A0H2VI31	34	K	Dihydrolipoyl dehydrogenase	SE_0794
Cellular Component	GO:1990204	3	oxidoreductase complex	0.0504718	A0A0H2VI31	379	K	Dihydrolipoyl dehydrogenase	SE_0794
Cellular Component	GO:1990204	3	oxidoreductase complex	0.0504718	A0A0H2VI31	376	K	Dihydrolipoyl dehydrogenase	SE_0794
Cellular Component	GO:1990204	3	oxidoreductase complex	0.0504718	A0A0H2VI31	230	K	Dihydrolipoyl dehydrogenase	SE_0794
Cellular Component	GO:1990204	3	oxidoreductase complex	0.0504718	A0A0H2VI31	224	K	Dihydrolipoyl dehydrogenase	SE_0794
Cellular Component	GO:1990204	3	oxidoreductase complex	0.0504718	A0A0H2VI31	111	K	Dihydrolipoyl dehydrogenase	SE_0794
Cellular Component	GO:1990204	3	oxidoreductase complex	0.0504718	A0A0H2VF65	8	K	Ribonucleoside-diphosphate reductase	SE_0513
Cellular Component	GO:1990204	3	oxidoreductase complex	0.0504718	Q8CMM1	312	K	Probable glycine dehydrogenase (decarboxylating) subunit 2	gcvPB
Cellular Component	GO:1990204	3	oxidoreductase complex	0.0504718	Q8CMM1	204	K	Probable glycine dehydrogenase (decarboxylating) subunit 2	gcvPB
Cellular Component	GO:1990204	3	oxidoreductase complex	0.0504718	Q8CMM1	492	K	Probable glycine dehydrogenase (decarboxylating) subunit 2	gcvPB
Cellular Component	GO:1990204	3	oxidoreductase complex	0.0504718	Q8CMM1	487	K	Probable glycine dehydrogenase (decarboxylating) subunit 2	gcvPB
Cellular Component	GO:1990204	3	oxidoreductase complex	0.0504718	A0A0H2VJ83	70	K	Nitrate reductase beta chain narH	SE_1974
Cellular Component	GO:1990204	3	oxidoreductase complex	0.0504718	A0A0H2VJ83	290	K	Nitrate reductase beta chain narH	SE_1974
Cellular Component	GO:1990204	3	oxidoreductase complex	0.0504718	Q8CMQ2	155	K	Alkyl hydroperoxide reductase subunit C	ahpC
Cellular Component	GO:1990204	3	oxidoreductase complex	0.0504718	Q8CMQ2	24	K	Alkyl hydroperoxide reductase subunit C	ahpC
Cellular Component	GO:1990204	3	oxidoreductase complex	0.0504718	Q8CMQ2	188	K	Alkyl hydroperoxide reductase subunit C	ahpC
Cellular Component	GO:1990204	3	oxidoreductase complex	0.0504718	Q8CMQ2	171	K	Alkyl hydroperoxide reductase subunit C	ahpC
Cellular Component	GO:1990204	3	oxidoreductase complex	0.0504718	Q8CMQ2	20	K	Alkyl hydroperoxide reductase subunit C	ahpC
Cellular Component	GO:1990204	3	oxidoreductase complex	0.0504718	Q8CMM0	39	K	Probable glycine dehydrogenase (decarboxylating) subunit 1	gcvPA
Cellular Component	GO:1990204	3	oxidoreductase complex	0.0504718	Q8CMM0	369	K	Probable glycine dehydrogenase (decarboxylating) subunit 1	gcvPA
Cellular Component	GO:1990204	3	oxidoreductase complex	0.0504718	Q8CMM0	433	K	Probable glycine dehydrogenase (decarboxylating) subunit 1	gcvPA
Cellular Component	GO:1990204	3	oxidoreductase complex	0.0504718	A0A0H2VHP1	1070	K	Respiratory nitrate reductase alpha chain	SE_1975
Cellular Component	GO:1990204	3	oxidoreductase complex	0.0504718	A0A0H2VHP1	10	K	Respiratory nitrate reductase alpha chain	SE_1975
Cellular Component	GO:1990204	3	oxidoreductase complex	0.0504718	A0A0H2VHP1	107	K	Respiratory nitrate reductase alpha chain	SE_1975
Cellular Component	GO:1990204	3	oxidoreductase complex	0.0504718	Q8CP83	572	K	2-oxoglutarate dehydrogenase E1 component	odhA
Cellular Component	GO:1990204	3	oxidoreductase complex	0.0504718	Q8CP83	149	K	2-oxoglutarate dehydrogenase E1 component	odhA
Cellular Component	GO:1990204	3	oxidoreductase complex	0.0504718	Q8CP83	191	K	2-oxoglutarate dehydrogenase E1 component	odhA
Cellular Component	GO:1990204	3	oxidoreductase complex	0.0504718	Q8CP83	859	K	2-oxoglutarate dehydrogenase E1 component	odhA
Cellular Component	GO:1990204	3	oxidoreductase complex	0.0504718	Q8CP83	210	K	2-oxoglutarate dehydrogenase E1 component	odhA
Cellular Component	GO:1990204	3	oxidoreductase complex	0.0504718	Q8CP83	73	K	2-oxoglutarate dehydrogenase E1 component	odhA
Cellular Component	GO:1990204	3	oxidoreductase complex	0.0504718	Q8CP83	898	K	2-oxoglutarate dehydrogenase E1 component	odhA
Cellular Component	GO:1990204	3	oxidoreductase complex	0.0504718	Q8CP83	520	K	2-oxoglutarate dehydrogenase E1 component	odhA
Cellular Component	GO:1990204	3	oxidoreductase complex	0.0504718	Q8CSL9	239	K	Dihydrolipoyllysine-residue succinyltransferase component of 2-oxoglutarate dehydrogenase complex	odhB
Cellular Component	GO:1990204	3	oxidoreductase complex	0.0504718	Q8CSL9	262	K	Dihydrolipoyllysine-residue succinyltransferase component of 2-oxoglutarate dehydrogenase complex	odhB
Cellular Component	GO:1990204	3	oxidoreductase complex	0.0504718	Q8CSL9	187	K	Dihydrolipoyllysine-residue succinyltransferase component of 2-oxoglutarate dehydrogenase complex	odhB
Cellular Component	GO:1990204	3	oxidoreductase complex	0.0504718	Q8CSL9	404	K	Dihydrolipoyllysine-residue succinyltransferase component of 2-oxoglutarate dehydrogenase complex	odhB
Cellular Component	GO:0045252	4	oxoglutarate dehydrogenase complex	0.276527	A0A0H2VI31	161	K	Dihydrolipoyl dehydrogenase	SE_0794
Cellular Component	GO:0045252	4	oxoglutarate dehydrogenase complex	0.276527	A0A0H2VI31	34	K	Dihydrolipoyl dehydrogenase	SE_0794
Cellular Component	GO:0045252	4	oxoglutarate dehydrogenase complex	0.276527	A0A0H2VI31	379	K	Dihydrolipoyl dehydrogenase	SE_0794
Cellular Component	GO:0045252	4	oxoglutarate dehydrogenase complex	0.276527	A0A0H2VI31	376	K	Dihydrolipoyl dehydrogenase	SE_0794
Cellular Component	GO:0045252	4	oxoglutarate dehydrogenase complex	0.276527	A0A0H2VI31	230	K	Dihydrolipoyl dehydrogenase	SE_0794
Cellular Component	GO:0045252	4	oxoglutarate dehydrogenase complex	0.276527	A0A0H2VI31	224	K	Dihydrolipoyl dehydrogenase	SE_0794
Cellular Component	GO:0045252	4	oxoglutarate dehydrogenase complex	0.276527	A0A0H2VI31	111	K	Dihydrolipoyl dehydrogenase	SE_0794
Cellular Component	GO:0045252	4	oxoglutarate dehydrogenase complex	0.276527	Q8CP83	572	K	2-oxoglutarate dehydrogenase E1 component	odhA
Cellular Component	GO:0045252	4	oxoglutarate dehydrogenase complex	0.276527	Q8CP83	149	K	2-oxoglutarate dehydrogenase E1 component	odhA
Cellular Component	GO:0045252	4	oxoglutarate dehydrogenase complex	0.276527	Q8CP83	191	K	2-oxoglutarate dehydrogenase E1 component	odhA
Cellular Component	GO:0045252	4	oxoglutarate dehydrogenase complex	0.276527	Q8CP83	859	K	2-oxoglutarate dehydrogenase E1 component	odhA
Cellular Component	GO:0045252	4	oxoglutarate dehydrogenase complex	0.276527	Q8CP83	210	K	2-oxoglutarate dehydrogenase E1 component	odhA
Cellular Component	GO:0045252	4	oxoglutarate dehydrogenase complex	0.276527	Q8CP83	73	K	2-oxoglutarate dehydrogenase E1 component	odhA
Cellular Component	GO:0045252	4	oxoglutarate dehydrogenase complex	0.276527	Q8CP83	898	K	2-oxoglutarate dehydrogenase E1 component	odhA
Cellular Component	GO:0045252	4	oxoglutarate dehydrogenase complex	0.276527	Q8CP83	520	K	2-oxoglutarate dehydrogenase E1 component	odhA
Cellular Component	GO:0045252	4	oxoglutarate dehydrogenase complex	0.276527	Q8CSL9	239	K	Dihydrolipoyllysine-residue succinyltransferase component of 2-oxoglutarate dehydrogenase complex	odhB
Cellular Component	GO:0045252	4	oxoglutarate dehydrogenase complex	0.276527	Q8CSL9	262	K	Dihydrolipoyllysine-residue succinyltransferase component of 2-oxoglutarate dehydrogenase complex	odhB
Cellular Component	GO:0045252	4	oxoglutarate dehydrogenase complex	0.276527	Q8CSL9	187	K	Dihydrolipoyllysine-residue succinyltransferase component of 2-oxoglutarate dehydrogenase complex	odhB
Cellular Component	GO:0045252	4	oxoglutarate dehydrogenase complex	0.276527	Q8CSL9	404	K	Dihydrolipoyllysine-residue succinyltransferase component of 2-oxoglutarate dehydrogenase complex	odhB
Cellular Component	GO:1990904	2	ribonucleoprotein complex	2.45199e-13	P66175	22	K	50S ribosomal protein L29	rpmC
Cellular Component	GO:1990904	2	ribonucleoprotein complex	2.45199e-13	Q8CS87	99	K	50S ribosomal protein L21	rplU
Cellular Component	GO:1990904	2	ribonucleoprotein complex	2.45199e-13	Q8CS87	70	K	50S ribosomal protein L21	rplU
Cellular Component	GO:1990904	2	ribonucleoprotein complex	2.45199e-13	Q8CRG4	81	K	30S ribosomal protein S19	rpsS
Cellular Component	GO:1990904	2	ribonucleoprotein complex	2.45199e-13	Q8CRG4	27	K	30S ribosomal protein S19	rpsS
Cellular Component	GO:1990904	2	ribonucleoprotein complex	2.45199e-13	Q8CRG4	88	K	30S ribosomal protein S19	rpsS
Cellular Component	GO:1990904	2	ribonucleoprotein complex	2.45199e-13	Q8CRG4	18	K	30S ribosomal protein S19	rpsS
Cellular Component	GO:1990904	2	ribonucleoprotein complex	2.45199e-13	Q8CRG4	56	K	30S ribosomal protein S19	rpsS
Cellular Component	GO:1990904	2	ribonucleoprotein complex	2.45199e-13	Q8CRG4	7	K	30S ribosomal protein S19	rpsS
Cellular Component	GO:1990904	2	ribonucleoprotein complex	2.45199e-13	Q8CRG4	17	K	30S ribosomal protein S19	rpsS
Cellular Component	GO:1990904	2	ribonucleoprotein complex	2.45199e-13	Q8CRH5	158	K	50S ribosomal protein L6	rplF
Cellular Component	GO:1990904	2	ribonucleoprotein complex	2.45199e-13	Q8CRH5	59	K	50S ribosomal protein L6	rplF
Cellular Component	GO:1990904	2	ribonucleoprotein complex	2.45199e-13	Q8CRH5	44	K	50S ribosomal protein L6	rplF
Cellular Component	GO:1990904	2	ribonucleoprotein complex	2.45199e-13	Q8CST2	13	K	30S ribosomal protein S15	rpsO
Cellular Component	GO:1990904	2	ribonucleoprotein complex	2.45199e-13	Q8CRG5	27	K	50S ribosomal protein L22	rplV
Cellular Component	GO:1990904	2	ribonucleoprotein complex	2.45199e-13	Q8CRG5	98	K	50S ribosomal protein L22	rplV
Cellular Component	GO:1990904	2	ribonucleoprotein complex	2.45199e-13	Q8CRG5	83	K	50S ribosomal protein L22	rplV
Cellular Component	GO:1990904	2	ribonucleoprotein complex	2.45199e-13	Q8CRG5	111	K	50S ribosomal protein L22	rplV
Cellular Component	GO:1990904	2	ribonucleoprotein complex	2.45199e-13	Q8CRG7	124	K	50S ribosomal protein L16	rplP
Cellular Component	GO:1990904	2	ribonucleoprotein complex	2.45199e-13	Q8CRG7	98	K	50S ribosomal protein L16	rplP
Cellular Component	GO:1990904	2	ribonucleoprotein complex	2.45199e-13	Q8CRG0	205	K	50S ribosomal protein L3	rplC
Cellular Component	GO:1990904	2	ribonucleoprotein complex	2.45199e-13	Q8CRG0	67	K	50S ribosomal protein L3	rplC
Cellular Component	GO:1990904	2	ribonucleoprotein complex	2.45199e-13	Q8CRG0	39	K	50S ribosomal protein L3	rplC
Cellular Component	GO:1990904	2	ribonucleoprotein complex	2.45199e-13	Q8CRG0	71	K	50S ribosomal protein L3	rplC
Cellular Component	GO:1990904	2	ribonucleoprotein complex	2.45199e-13	Q8CRG0	132	K	50S ribosomal protein L3	rplC
Cellular Component	GO:1990904	2	ribonucleoprotein complex	2.45199e-13	Q8CRG0	125	K	50S ribosomal protein L3	rplC
Cellular Component	GO:1990904	2	ribonucleoprotein complex	2.45199e-13	Q8CRG0	78	K	50S ribosomal protein L3	rplC
Cellular Component	GO:1990904	2	ribonucleoprotein complex	2.45199e-13	Q8CRG0	79	K	50S ribosomal protein L3	rplC
Cellular Component	GO:1990904	2	ribonucleoprotein complex	2.45199e-13	Q8CRJ0	7	K	30S ribosomal protein S9	rpsI
Cellular Component	GO:1990904	2	ribonucleoprotein complex	2.45199e-13	Q8CS77	33	K	50S ribosomal protein L20	rplT
Cellular Component	GO:1990904	2	ribonucleoprotein complex	2.45199e-13	Q8CS77	85	K	50S ribosomal protein L20	rplT
Cellular Component	GO:1990904	2	ribonucleoprotein complex	2.45199e-13	Q8CS77	5	K	50S ribosomal protein L20	rplT
Cellular Component	GO:1990904	2	ribonucleoprotein complex	2.45199e-13	Q8CRG8	18	K	30S ribosomal protein S17	rpsQ
Cellular Component	GO:1990904	2	ribonucleoprotein complex	2.45199e-13	Q8CRG8	73	K	30S ribosomal protein S17	rpsQ
Cellular Component	GO:1990904	2	ribonucleoprotein complex	2.45199e-13	Q8CRG8	47	K	30S ribosomal protein S17	rpsQ
Cellular Component	GO:1990904	2	ribonucleoprotein complex	2.45199e-13	Q8CRH1	84	K	50S ribosomal protein L24	rplX
Cellular Component	GO:1990904	2	ribonucleoprotein complex	2.45199e-13	Q8CRH1	42	K	50S ribosomal protein L24	rplX
Cellular Component	GO:1990904	2	ribonucleoprotein complex	2.45199e-13	Q8CRH1	102	K	50S ribosomal protein L24	rplX
Cellular Component	GO:1990904	2	ribonucleoprotein complex	2.45199e-13	Q8CRH1	96	K	50S ribosomal protein L24	rplX
Cellular Component	GO:1990904	2	ribonucleoprotein complex	2.45199e-13	Q8CRH1	29	K	50S ribosomal protein L24	rplX
Cellular Component	GO:1990904	2	ribonucleoprotein complex	2.45199e-13	Q8CRM8	63	K	50S ribosomal protein L31 type B	rpmE2
Cellular Component	GO:1990904	2	ribonucleoprotein complex	2.45199e-13	Q8CRM8	2	K	50S ribosomal protein L31 type B	rpmE2
Cellular Component	GO:1990904	2	ribonucleoprotein complex	2.45199e-13	P66255	10	K	50S ribosomal protein L34	rpmH
Cellular Component	GO:1990904	2	ribonucleoprotein complex	2.45199e-13	Q8CS75	149	K	Translation initiation factor IF-3	infC
Cellular Component	GO:1990904	2	ribonucleoprotein complex	2.45199e-13	Q8CS75	85	K	Translation initiation factor IF-3	infC
Cellular Component	GO:1990904	2	ribonucleoprotein complex	2.45199e-13	Q8CS75	75	K	Translation initiation factor IF-3	infC
Cellular Component	GO:1990904	2	ribonucleoprotein complex	2.45199e-13	Q8CS75	70	K	Translation initiation factor IF-3	infC
Cellular Component	GO:1990904	2	ribonucleoprotein complex	2.45199e-13	Q8CS75	157	K	Translation initiation factor IF-3	infC
Cellular Component	GO:1990904	2	ribonucleoprotein complex	2.45199e-13	Q8CRH8	21	K	50S ribosomal protein L30	rpmD
Cellular Component	GO:1990904	2	ribonucleoprotein complex	2.45199e-13	Q8CRH8	30	K	50S ribosomal protein L30	rpmD
Cellular Component	GO:1990904	2	ribonucleoprotein complex	2.45199e-13	Q8CRH8	51	K	50S ribosomal protein L30	rpmD
Cellular Component	GO:1990904	2	ribonucleoprotein complex	2.45199e-13	Q8CRH8	29	K	50S ribosomal protein L30	rpmD
Cellular Component	GO:1990904	2	ribonucleoprotein complex	2.45199e-13	Q8CSZ2	37	K	50S ribosomal protein L32	rpmF
Cellular Component	GO:1990904	2	ribonucleoprotein complex	2.45199e-13	Q8CRI2	8	K	50S ribosomal protein L36	rpmJ
Cellular Component	GO:1990904	2	ribonucleoprotein complex	2.45199e-13	Q8CSE3	41	K	50S ribosomal protein L33 1	rpmG1
Cellular Component	GO:1990904	2	ribonucleoprotein complex	2.45199e-13	Q8CTF2	61	K	Ribosome hibernation promotion factor	hpf
Cellular Component	GO:1990904	2	ribonucleoprotein complex	2.45199e-13	Q8CRG6	134	K	30S ribosomal protein S3	rpsC
Cellular Component	GO:1990904	2	ribonucleoprotein complex	2.45199e-13	Q8CRG6	40	K	30S ribosomal protein S3	rpsC
Cellular Component	GO:1990904	2	ribonucleoprotein complex	2.45199e-13	Q8CRG6	97	K	30S ribosomal protein S3	rpsC
Cellular Component	GO:1990904	2	ribonucleoprotein complex	2.45199e-13	Q8CRG6	26	K	30S ribosomal protein S3	rpsC
Cellular Component	GO:1990904	2	ribonucleoprotein complex	2.45199e-13	Q8CRG6	107	K	30S ribosomal protein S3	rpsC
Cellular Component	GO:1990904	2	ribonucleoprotein complex	2.45199e-13	Q8CRG6	47	K	30S ribosomal protein S3	rpsC
Cellular Component	GO:1990904	2	ribonucleoprotein complex	2.45199e-13	Q8CRG6	106	K	30S ribosomal protein S3	rpsC
Cellular Component	GO:1990904	2	ribonucleoprotein complex	2.45199e-13	Q8CRG6	89	K	30S ribosomal protein S3	rpsC
Cellular Component	GO:1990904	2	ribonucleoprotein complex	2.45199e-13	Q8CRG6	96	K	30S ribosomal protein S3	rpsC
Cellular Component	GO:1990904	2	ribonucleoprotein complex	2.45199e-13	Q8CQU8	42	K	50S ribosomal protein L25	rplY
Cellular Component	GO:1990904	2	ribonucleoprotein complex	2.45199e-13	Q8CRI3	64	K	30S ribosomal protein S13	rpsM
Cellular Component	GO:1990904	2	ribonucleoprotein complex	2.45199e-13	Q8CRI3	46	K	30S ribosomal protein S13	rpsM
Cellular Component	GO:1990904	2	ribonucleoprotein complex	2.45199e-13	Q8CRI3	78	K	30S ribosomal protein S13	rpsM
Cellular Component	GO:1990904	2	ribonucleoprotein complex	2.45199e-13	P66523	8	K	30S ribosomal protein S21	rpsU
Cellular Component	GO:1990904	2	ribonucleoprotein complex	2.45199e-13	P66523	40	K	30S ribosomal protein S21	rpsU
Cellular Component	GO:1990904	2	ribonucleoprotein complex	2.45199e-13	P66336	11	K	30S ribosomal protein S10	rpsJ
Cellular Component	GO:1990904	2	ribonucleoprotein complex	2.45199e-13	P66336	57	K	30S ribosomal protein S10	rpsJ
Cellular Component	GO:1990904	2	ribonucleoprotein complex	2.45199e-13	P66336	30	K	30S ribosomal protein S10	rpsJ
Cellular Component	GO:1990904	2	ribonucleoprotein complex	2.45199e-13	P66336	24	K	30S ribosomal protein S10	rpsJ
Cellular Component	GO:1990904	2	ribonucleoprotein complex	2.45199e-13	Q8CRH7	159	K	30S ribosomal protein S5	rpsE
Cellular Component	GO:1990904	2	ribonucleoprotein complex	2.45199e-13	Q8CRH7	69	K	30S ribosomal protein S5	rpsE
Cellular Component	GO:1990904	2	ribonucleoprotein complex	2.45199e-13	Q8CRH7	97	K	30S ribosomal protein S5	rpsE
Cellular Component	GO:1990904	2	ribonucleoprotein complex	2.45199e-13	Q8CRH7	61	K	30S ribosomal protein S5	rpsE
Cellular Component	GO:1990904	2	ribonucleoprotein complex	2.45199e-13	Q8CRH7	9	K	30S ribosomal protein S5	rpsE
Cellular Component	GO:1990904	2	ribonucleoprotein complex	2.45199e-13	Q8CRI5	52	K	50S ribosomal protein L17	rplQ
Cellular Component	GO:1990904	2	ribonucleoprotein complex	2.45199e-13	Q8CRI5	53	K	50S ribosomal protein L17	rplQ
Cellular Component	GO:1990904	2	ribonucleoprotein complex	2.45199e-13	Q8CRI5	64	K	50S ribosomal protein L17	rplQ
Cellular Component	GO:1990904	2	ribonucleoprotein complex	2.45199e-13	Q8CRI5	46	K	50S ribosomal protein L17	rplQ
Cellular Component	GO:1990904	2	ribonucleoprotein complex	2.45199e-13	Q8CRI5	105	K	50S ribosomal protein L17	rplQ
Cellular Component	GO:1990904	2	ribonucleoprotein complex	2.45199e-13	Q8CSV0	88	K	30S ribosomal protein S16	rpsP
Cellular Component	GO:1990904	2	ribonucleoprotein complex	2.45199e-13	Q8CSV0	66	K	30S ribosomal protein S16	rpsP
Cellular Component	GO:1990904	2	ribonucleoprotein complex	2.45199e-13	Q8CSC6	70	K	30S ribosomal protein S20	rpsT
Cellular Component	GO:1990904	2	ribonucleoprotein complex	2.45199e-13	Q8CSC6	46	K	30S ribosomal protein S20	rpsT
Cellular Component	GO:1990904	2	ribonucleoprotein complex	2.45199e-13	Q8CSC6	55	K	30S ribosomal protein S20	rpsT
Cellular Component	GO:1990904	2	ribonucleoprotein complex	2.45199e-13	Q8CRH2	119	K	50S ribosomal protein L5	rplE
Cellular Component	GO:1990904	2	ribonucleoprotein complex	2.45199e-13	Q8CRH2	18	K	50S ribosomal protein L5	rplE
Cellular Component	GO:1990904	2	ribonucleoprotein complex	2.45199e-13	Q8CRH2	72	K	50S ribosomal protein L5	rplE
Cellular Component	GO:1990904	2	ribonucleoprotein complex	2.45199e-13	Q8CRH2	7	K	50S ribosomal protein L5	rplE
Cellular Component	GO:1990904	2	ribonucleoprotein complex	2.45199e-13	Q8CRH2	19	K	50S ribosomal protein L5	rplE
Cellular Component	GO:1990904	2	ribonucleoprotein complex	2.45199e-13	Q8CSP9	41	K	50S ribosomal protein L33 2	rpmG2
Cellular Component	GO:1990904	2	ribonucleoprotein complex	2.45199e-13	Q8CS54	28	K	30S ribosomal protein S4	rpsD
Cellular Component	GO:1990904	2	ribonucleoprotein complex	2.45199e-13	Q8CS54	134	K	30S ribosomal protein S4	rpsD
Cellular Component	GO:1990904	2	ribonucleoprotein complex	2.45199e-13	Q8CS54	144	K	30S ribosomal protein S4	rpsD
Cellular Component	GO:1990904	2	ribonucleoprotein complex	2.45199e-13	Q8CTT2	53	K	50S ribosomal protein L10	rplJ
Cellular Component	GO:1990904	2	ribonucleoprotein complex	2.45199e-13	Q8CTT2	56	K	50S ribosomal protein L10	rplJ
Cellular Component	GO:1990904	2	ribonucleoprotein complex	2.45199e-13	Q8CTT2	101	K	50S ribosomal protein L10	rplJ
Cellular Component	GO:1990904	2	ribonucleoprotein complex	2.45199e-13	Q8CTT2	9	K	50S ribosomal protein L10	rplJ
Cellular Component	GO:1990904	2	ribonucleoprotein complex	2.45199e-13	Q8CTT5	81	K	50S ribosomal protein L11	rplK
Cellular Component	GO:1990904	2	ribonucleoprotein complex	2.45199e-13	Q8CTT5	80	K	50S ribosomal protein L11	rplK
Cellular Component	GO:1990904	2	ribonucleoprotein complex	2.45199e-13	Q8CRG2	74	K	50S ribosomal protein L23	rplW
Cellular Component	GO:1990904	2	ribonucleoprotein complex	2.45199e-13	Q8CRG2	59	K	50S ribosomal protein L23	rplW
Cellular Component	GO:1990904	2	ribonucleoprotein complex	2.45199e-13	Q8CRG2	8	K	50S ribosomal protein L23	rplW
Cellular Component	GO:1990904	2	ribonucleoprotein complex	2.45199e-13	Q8CRG2	83	K	50S ribosomal protein L23	rplW
Cellular Component	GO:1990904	2	ribonucleoprotein complex	2.45199e-13	Q8CRG2	24	K	50S ribosomal protein L23	rplW
Cellular Component	GO:1990904	2	ribonucleoprotein complex	2.45199e-13	P66618	35	K	30S ribosomal protein S7	rpsG
Cellular Component	GO:1990904	2	ribonucleoprotein complex	2.45199e-13	P66618	25	K	30S ribosomal protein S7	rpsG
Cellular Component	GO:1990904	2	ribonucleoprotein complex	2.45199e-13	Q8CSU2	81	K	30S ribosomal protein S2	rpsB
Cellular Component	GO:1990904	2	ribonucleoprotein complex	2.45199e-13	Q8CSU2	74	K	30S ribosomal protein S2	rpsB
Cellular Component	GO:1990904	2	ribonucleoprotein complex	2.45199e-13	Q8CSU2	49	K	30S ribosomal protein S2	rpsB
Cellular Component	GO:1990904	2	ribonucleoprotein complex	2.45199e-13	Q8CSU2	138	K	30S ribosomal protein S2	rpsB
Cellular Component	GO:1990904	2	ribonucleoprotein complex	2.45199e-13	Q8CSU2	132	K	30S ribosomal protein S2	rpsB
Cellular Component	GO:1990904	2	ribonucleoprotein complex	2.45199e-13	Q8CSU2	73	K	30S ribosomal protein S2	rpsB
Cellular Component	GO:1990904	2	ribonucleoprotein complex	2.45199e-13	Q8CSU2	29	K	30S ribosomal protein S2	rpsB
Cellular Component	GO:1990904	2	ribonucleoprotein complex	2.45199e-13	Q8CRG9	53	K	50S ribosomal protein L14	rplN
Cellular Component	GO:1990904	2	ribonucleoprotein complex	2.45199e-13	Q8CRG9	9	K	50S ribosomal protein L14	rplN
Cellular Component	GO:1990904	2	ribonucleoprotein complex	2.45199e-13	Q8CRH4	33	K	30S ribosomal protein S8	rpsH
Cellular Component	GO:1990904	2	ribonucleoprotein complex	2.45199e-13	Q8CRH4	90	K	30S ribosomal protein S8	rpsH
Cellular Component	GO:1990904	2	ribonucleoprotein complex	2.45199e-13	Q8CRH4	78	K	30S ribosomal protein S8	rpsH
Cellular Component	GO:1990904	2	ribonucleoprotein complex	2.45199e-13	Q8CRH4	41	K	30S ribosomal protein S8	rpsH
Cellular Component	GO:1990904	2	ribonucleoprotein complex	2.45199e-13	Q8CRH4	34	K	30S ribosomal protein S8	rpsH
Cellular Component	GO:1990904	2	ribonucleoprotein complex	2.45199e-13	Q8CRH4	56	K	30S ribosomal protein S8	rpsH
Cellular Component	GO:1990904	2	ribonucleoprotein complex	2.45199e-13	Q8CRH4	24	K	30S ribosomal protein S8	rpsH
Cellular Component	GO:1990904	2	ribonucleoprotein complex	2.45199e-13	Q8CRH4	65	K	30S ribosomal protein S8	rpsH
Cellular Component	GO:1990904	2	ribonucleoprotein complex	2.45199e-13	Q8CRH4	82	K	30S ribosomal protein S8	rpsH
Cellular Component	GO:1990904	2	ribonucleoprotein complex	2.45199e-13	Q8CSU9	85	K	50S ribosomal protein L19	rplS
Cellular Component	GO:1990904	2	ribonucleoprotein complex	2.45199e-13	Q8CSU9	65	K	50S ribosomal protein L19	rplS
Cellular Component	GO:1990904	2	ribonucleoprotein complex	2.45199e-13	Q8CRH6	38	K	50S ribosomal protein L18	rplR
Cellular Component	GO:1990904	2	ribonucleoprotein complex	2.45199e-13	Q8CRH6	28	K	50S ribosomal protein L18	rplR
Cellular Component	GO:1990904	2	ribonucleoprotein complex	2.45199e-13	Q8CRH6	21	K	50S ribosomal protein L18	rplR
Cellular Component	GO:1990904	2	ribonucleoprotein complex	2.45199e-13	Q8CRH6	83	K	50S ribosomal protein L18	rplR
Cellular Component	GO:1990904	2	ribonucleoprotein complex	2.45199e-13	Q8CRH6	61	K	50S ribosomal protein L18	rplR
Cellular Component	GO:1990904	2	ribonucleoprotein complex	2.45199e-13	Q8CRH6	107	K	50S ribosomal protein L18	rplR
Cellular Component	GO:1990904	2	ribonucleoprotein complex	2.45199e-13	Q8CTS8	101	K	30S ribosomal protein S12	rpsL
Cellular Component	GO:1990904	2	ribonucleoprotein complex	2.45199e-13	Q8CTS8	43	K	30S ribosomal protein S12	rpsL
Cellular Component	GO:1990904	2	ribonucleoprotein complex	2.45199e-13	Q8CTS8	17	K	30S ribosomal protein S12	rpsL
Cellular Component	GO:1990904	2	ribonucleoprotein complex	2.45199e-13	Q8CQP4	19	K	30S ribosomal protein S6	rpsF
Cellular Component	GO:1990904	2	ribonucleoprotein complex	2.45199e-13	Q8CQP6	35	K	30S ribosomal protein S18	rpsR
Cellular Component	GO:1990904	2	ribonucleoprotein complex	2.45199e-13	Q8CQP6	77	K	30S ribosomal protein S18	rpsR
Cellular Component	GO:1990904	2	ribonucleoprotein complex	2.45199e-13	Q8CQP6	65	K	30S ribosomal protein S18	rpsR
Cellular Component	GO:1990904	2	ribonucleoprotein complex	2.45199e-13	Q8CQP6	55	K	30S ribosomal protein S18	rpsR
Cellular Component	GO:1990904	2	ribonucleoprotein complex	2.45199e-13	Q8CS89	76	K	50S ribosomal protein L27	rpmA
Cellular Component	GO:1990904	2	ribonucleoprotein complex	2.45199e-13	Q8CS76	65	K	50S ribosomal protein L35	rpmI
Cellular Component	GO:1990904	2	ribonucleoprotein complex	2.45199e-13	Q8CRI9	69	K	50S ribosomal protein L13	rplM
Cellular Component	GO:1990904	2	ribonucleoprotein complex	2.45199e-13	Q8CRI9	94	K	50S ribosomal protein L13	rplM
Cellular Component	GO:1990904	2	ribonucleoprotein complex	2.45199e-13	Q8CRI9	122	K	50S ribosomal protein L13	rplM
Cellular Component	GO:1990904	2	ribonucleoprotein complex	2.45199e-13	Q8CRI9	15	K	50S ribosomal protein L13	rplM
Cellular Component	GO:1990904	2	ribonucleoprotein complex	2.45199e-13	Q8CRG1	52	K	50S ribosomal protein L4	rplD
Cellular Component	GO:1990904	2	ribonucleoprotein complex	2.45199e-13	Q8CRG1	201	K	50S ribosomal protein L4	rplD
Cellular Component	GO:1990904	2	ribonucleoprotein complex	2.45199e-13	Q8CRG1	140	K	50S ribosomal protein L4	rplD
Cellular Component	GO:1990904	2	ribonucleoprotein complex	2.45199e-13	Q8CRG1	150	K	50S ribosomal protein L4	rplD
Cellular Component	GO:1990904	2	ribonucleoprotein complex	2.45199e-13	Q8CRG3	252	K	50S ribosomal protein L2	rplB
Cellular Component	GO:1990904	2	ribonucleoprotein complex	2.45199e-13	Q8CRG3	71	K	50S ribosomal protein L2	rplB
Cellular Component	GO:1990904	2	ribonucleoprotein complex	2.45199e-13	Q8CRG3	7	K	50S ribosomal protein L2	rplB
Cellular Component	GO:1990904	2	ribonucleoprotein complex	2.45199e-13	Q8CRG3	268	K	50S ribosomal protein L2	rplB
Cellular Component	GO:1990904	2	ribonucleoprotein complex	2.45199e-13	Q8CRG3	31	K	50S ribosomal protein L2	rplB
Cellular Component	GO:1990904	2	ribonucleoprotein complex	2.45199e-13	Q8CTT4	151	K	50S ribosomal protein L1	rplA
Cellular Component	GO:1990904	2	ribonucleoprotein complex	2.45199e-13	Q8CTT4	7	K	50S ribosomal protein L1	rplA
Cellular Component	GO:1990904	2	ribonucleoprotein complex	2.45199e-13	Q8CTT4	230	K	50S ribosomal protein L1	rplA
Cellular Component	GO:1990904	2	ribonucleoprotein complex	2.45199e-13	Q8CTT4	160	K	50S ribosomal protein L1	rplA
Cellular Component	GO:1990904	2	ribonucleoprotein complex	2.45199e-13	Q8CTT4	150	K	50S ribosomal protein L1	rplA
Cellular Component	GO:1990904	2	ribonucleoprotein complex	2.45199e-13	Q8CTT4	54	K	50S ribosomal protein L1	rplA
Cellular Component	GO:1990904	2	ribonucleoprotein complex	2.45199e-13	Q8CTT4	14	K	50S ribosomal protein L1	rplA
Cellular Component	GO:1990904	2	ribonucleoprotein complex	2.45199e-13	Q8CU90	109	K	50S ribosomal protein L9	rplI
Cellular Component	GO:1990904	2	ribonucleoprotein complex	2.45199e-13	Q8CU90	69	K	50S ribosomal protein L9	rplI
Cellular Component	GO:1990904	2	ribonucleoprotein complex	2.45199e-13	Q8CU90	52	K	50S ribosomal protein L9	rplI
Cellular Component	GO:1990904	2	ribonucleoprotein complex	2.45199e-13	Q8CU90	103	K	50S ribosomal protein L9	rplI
Cellular Component	GO:1990904	2	ribonucleoprotein complex	2.45199e-13	Q8CU90	34	K	50S ribosomal protein L9	rplI
Cellular Component	GO:1990904	2	ribonucleoprotein complex	2.45199e-13	Q8CU90	73	K	50S ribosomal protein L9	rplI
Cellular Component	GO:1990904	2	ribonucleoprotein complex	2.45199e-13	Q8CRH9	124	K	50S ribosomal protein L15	rplO
Cellular Component	GO:1990904	2	ribonucleoprotein complex	2.45199e-13	Q8CRH9	119	K	50S ribosomal protein L15	rplO
Cellular Component	GO:1990904	2	ribonucleoprotein complex	2.45199e-13	Q8CRH9	106	K	50S ribosomal protein L15	rplO
Cellular Component	GO:1990904	2	ribonucleoprotein complex	2.45199e-13	Q8CRH9	7	K	50S ribosomal protein L15	rplO
Cellular Component	GO:1990904	2	ribonucleoprotein complex	2.45199e-13	Q8CRH9	2	K	50S ribosomal protein L15	rplO
Cellular Component	GO:0045239	2	tricarboxylic acid cycle enzyme complex	0.276527	A0A0H2VI31	161	K	Dihydrolipoyl dehydrogenase	SE_0794
Cellular Component	GO:0045239	2	tricarboxylic acid cycle enzyme complex	0.276527	A0A0H2VI31	34	K	Dihydrolipoyl dehydrogenase	SE_0794
Cellular Component	GO:0045239	2	tricarboxylic acid cycle enzyme complex	0.276527	A0A0H2VI31	379	K	Dihydrolipoyl dehydrogenase	SE_0794
Cellular Component	GO:0045239	2	tricarboxylic acid cycle enzyme complex	0.276527	A0A0H2VI31	376	K	Dihydrolipoyl dehydrogenase	SE_0794
Cellular Component	GO:0045239	2	tricarboxylic acid cycle enzyme complex	0.276527	A0A0H2VI31	230	K	Dihydrolipoyl dehydrogenase	SE_0794
Cellular Component	GO:0045239	2	tricarboxylic acid cycle enzyme complex	0.276527	A0A0H2VI31	224	K	Dihydrolipoyl dehydrogenase	SE_0794
Cellular Component	GO:0045239	2	tricarboxylic acid cycle enzyme complex	0.276527	A0A0H2VI31	111	K	Dihydrolipoyl dehydrogenase	SE_0794
Cellular Component	GO:0045239	2	tricarboxylic acid cycle enzyme complex	0.276527	Q8CP83	572	K	2-oxoglutarate dehydrogenase E1 component	odhA
Cellular Component	GO:0045239	2	tricarboxylic acid cycle enzyme complex	0.276527	Q8CP83	149	K	2-oxoglutarate dehydrogenase E1 component	odhA
Cellular Component	GO:0045239	2	tricarboxylic acid cycle enzyme complex	0.276527	Q8CP83	191	K	2-oxoglutarate dehydrogenase E1 component	odhA
Cellular Component	GO:0045239	2	tricarboxylic acid cycle enzyme complex	0.276527	Q8CP83	859	K	2-oxoglutarate dehydrogenase E1 component	odhA
Cellular Component	GO:0045239	2	tricarboxylic acid cycle enzyme complex	0.276527	Q8CP83	210	K	2-oxoglutarate dehydrogenase E1 component	odhA
Cellular Component	GO:0045239	2	tricarboxylic acid cycle enzyme complex	0.276527	Q8CP83	73	K	2-oxoglutarate dehydrogenase E1 component	odhA
Cellular Component	GO:0045239	2	tricarboxylic acid cycle enzyme complex	0.276527	Q8CP83	898	K	2-oxoglutarate dehydrogenase E1 component	odhA
Cellular Component	GO:0045239	2	tricarboxylic acid cycle enzyme complex	0.276527	Q8CP83	520	K	2-oxoglutarate dehydrogenase E1 component	odhA
Cellular Component	GO:0045239	2	tricarboxylic acid cycle enzyme complex	0.276527	Q8CSL9	239	K	Dihydrolipoyllysine-residue succinyltransferase component of 2-oxoglutarate dehydrogenase complex	odhB
Cellular Component	GO:0045239	2	tricarboxylic acid cycle enzyme complex	0.276527	Q8CSL9	262	K	Dihydrolipoyllysine-residue succinyltransferase component of 2-oxoglutarate dehydrogenase complex	odhB
Cellular Component	GO:0045239	2	tricarboxylic acid cycle enzyme complex	0.276527	Q8CSL9	187	K	Dihydrolipoyllysine-residue succinyltransferase component of 2-oxoglutarate dehydrogenase complex	odhB
Cellular Component	GO:0045239	2	tricarboxylic acid cycle enzyme complex	0.276527	Q8CSL9	404	K	Dihydrolipoyllysine-residue succinyltransferase component of 2-oxoglutarate dehydrogenase complex	odhB
Cellular Component	GO:0005844	3	polysome	0.226043	Q8CRG1	52	K	50S ribosomal protein L4	rplD
Cellular Component	GO:0005844	3	polysome	0.226043	Q8CRG1	201	K	50S ribosomal protein L4	rplD
Cellular Component	GO:0005844	3	polysome	0.226043	Q8CRG1	140	K	50S ribosomal protein L4	rplD
Cellular Component	GO:0005844	3	polysome	0.226043	Q8CRG1	150	K	50S ribosomal protein L4	rplD
Cellular Component	GO:0005844	3	polysome	0.226043	Q8CRG5	27	K	50S ribosomal protein L22	rplV
Cellular Component	GO:0005844	3	polysome	0.226043	Q8CRG5	98	K	50S ribosomal protein L22	rplV
Cellular Component	GO:0005844	3	polysome	0.226043	Q8CRG5	83	K	50S ribosomal protein L22	rplV
Cellular Component	GO:0005844	3	polysome	0.226043	Q8CRG5	111	K	50S ribosomal protein L22	rplV
Cellular Component	GO:0005960	4	glycine cleavage complex	0.226043	Q8CMM1	312	K	Probable glycine dehydrogenase (decarboxylating) subunit 2	gcvPB
Cellular Component	GO:0005960	4	glycine cleavage complex	0.226043	Q8CMM1	204	K	Probable glycine dehydrogenase (decarboxylating) subunit 2	gcvPB
Cellular Component	GO:0005960	4	glycine cleavage complex	0.226043	Q8CMM1	492	K	Probable glycine dehydrogenase (decarboxylating) subunit 2	gcvPB
Cellular Component	GO:0005960	4	glycine cleavage complex	0.226043	Q8CMM1	487	K	Probable glycine dehydrogenase (decarboxylating) subunit 2	gcvPB
Cellular Component	GO:0005960	4	glycine cleavage complex	0.226043	Q8CMM0	39	K	Probable glycine dehydrogenase (decarboxylating) subunit 1	gcvPA
Cellular Component	GO:0005960	4	glycine cleavage complex	0.226043	Q8CMM0	369	K	Probable glycine dehydrogenase (decarboxylating) subunit 1	gcvPA
Cellular Component	GO:0005960	4	glycine cleavage complex	0.226043	Q8CMM0	433	K	Probable glycine dehydrogenase (decarboxylating) subunit 1	gcvPA
Cellular Component	GO:0098562	3	cytoplasmic side of membrane	0.0249793	Q8CQ96	196	K	Probable malate:quinone oxidoreductase 2	mqo2
Cellular Component	GO:0098562	3	cytoplasmic side of membrane	0.0249793	A0A0H2VJ83	70	K	Nitrate reductase beta chain narH	SE_1974
Cellular Component	GO:0098562	3	cytoplasmic side of membrane	0.0249793	A0A0H2VJ83	290	K	Nitrate reductase beta chain narH	SE_1974
Cellular Component	GO:0098562	3	cytoplasmic side of membrane	0.0249793	A0A0H2VHP1	1070	K	Respiratory nitrate reductase alpha chain	SE_1975
Cellular Component	GO:0098562	3	cytoplasmic side of membrane	0.0249793	A0A0H2VHP1	10	K	Respiratory nitrate reductase alpha chain	SE_1975
Cellular Component	GO:0098562	3	cytoplasmic side of membrane	0.0249793	A0A0H2VHP1	107	K	Respiratory nitrate reductase alpha chain	SE_1975
Cellular Component	GO:0098562	3	cytoplasmic side of membrane	0.0249793	Q8CMY4	189	K	Probable malate:quinone oxidoreductase 4	mqo4
Cellular Component	GO:0098562	3	cytoplasmic side of membrane	0.0249793	Q8CMY4	155	K	Probable malate:quinone oxidoreductase 4	mqo4
Cellular Component	GO:0098562	3	cytoplasmic side of membrane	0.0249793	Q8CMY4	455	K	Probable malate:quinone oxidoreductase 4	mqo4
Cellular Component	GO:0098562	3	cytoplasmic side of membrane	0.0249793	Q8CMY4	167	K	Probable malate:quinone oxidoreductase 4	mqo4
Cellular Component	GO:0098562	3	cytoplasmic side of membrane	0.0249793	Q8CMY4	81	K	Probable malate:quinone oxidoreductase 4	mqo4
Cellular Component	GO:0098562	3	cytoplasmic side of membrane	0.0249793	Q8CMY4	205	K	Probable malate:quinone oxidoreductase 4	mqo4
Cellular Component	GO:0098562	3	cytoplasmic side of membrane	0.0249793	Q8CMY4	401	K	Probable malate:quinone oxidoreductase 4	mqo4
Cellular Component	GO:0098562	3	cytoplasmic side of membrane	0.0249793	Q8CMY4	126	K	Probable malate:quinone oxidoreductase 4	mqo4
Cellular Component	GO:0098562	3	cytoplasmic side of membrane	0.0249793	Q8CMY4	290	K	Probable malate:quinone oxidoreductase 4	mqo4
Cellular Component	GO:0098562	3	cytoplasmic side of membrane	0.0249793	Q8CPK5	72	K	Cell division protein FtsA	ftsA
Cellular Component	GO:0098562	3	cytoplasmic side of membrane	0.0249793	Q8CPK5	57	K	Cell division protein FtsA	ftsA
Cellular Component	GO:0098562	3	cytoplasmic side of membrane	0.0249793	Q8CPK5	411	K	Cell division protein FtsA	ftsA
Cellular Component	GO:0098562	3	cytoplasmic side of membrane	0.0249793	Q8CPK5	115	K	Cell division protein FtsA	ftsA
Cellular Component	GO:0098562	3	cytoplasmic side of membrane	0.0249793	Q8CPK5	460	K	Cell division protein FtsA	ftsA
Cellular Component	GO:0098562	3	cytoplasmic side of membrane	0.0249793	Q8CPK5	135	K	Cell division protein FtsA	ftsA
Cellular Component	GO:0098562	3	cytoplasmic side of membrane	0.0249793	Q8CQE8	488	K	Probable malate:quinone oxidoreductase 3	mqo3
Cellular Component	GO:0098562	3	cytoplasmic side of membrane	0.0249793	Q8CQE8	218	K	Probable malate:quinone oxidoreductase 3	mqo3
Cellular Component	GO:0098562	3	cytoplasmic side of membrane	0.0249793	Q8CN91	401	K	Probable malate:quinone oxidoreductase 1	mqo1
Cellular Component	GO:0098562	3	cytoplasmic side of membrane	0.0249793	Q8CN91	212	K	Probable malate:quinone oxidoreductase 1	mqo1
Cellular Component	GO:0098562	3	cytoplasmic side of membrane	0.0249793	Q8CN91	33	K	Probable malate:quinone oxidoreductase 1	mqo1
Cellular Component	GO:0098562	3	cytoplasmic side of membrane	0.0249793	Q8CN91	286	K	Probable malate:quinone oxidoreductase 1	mqo1
Cellular Component	GO:0098562	3	cytoplasmic side of membrane	0.0249793	Q8CN91	486	K	Probable malate:quinone oxidoreductase 1	mqo1
Cellular Component	GO:0098562	3	cytoplasmic side of membrane	0.0249793	Q8CN91	461	K	Probable malate:quinone oxidoreductase 1	mqo1
Cellular Component	GO:0098562	3	cytoplasmic side of membrane	0.0249793	Q8CN91	275	K	Probable malate:quinone oxidoreductase 1	mqo1
Cellular Component	GO:0045240	3	dihydrolipoyl dehydrogenase complex	0.276527	A0A0H2VI31	161	K	Dihydrolipoyl dehydrogenase	SE_0794
Cellular Component	GO:0045240	3	dihydrolipoyl dehydrogenase complex	0.276527	A0A0H2VI31	34	K	Dihydrolipoyl dehydrogenase	SE_0794
Cellular Component	GO:0045240	3	dihydrolipoyl dehydrogenase complex	0.276527	A0A0H2VI31	379	K	Dihydrolipoyl dehydrogenase	SE_0794
Cellular Component	GO:0045240	3	dihydrolipoyl dehydrogenase complex	0.276527	A0A0H2VI31	376	K	Dihydrolipoyl dehydrogenase	SE_0794
Cellular Component	GO:0045240	3	dihydrolipoyl dehydrogenase complex	0.276527	A0A0H2VI31	230	K	Dihydrolipoyl dehydrogenase	SE_0794
Cellular Component	GO:0045240	3	dihydrolipoyl dehydrogenase complex	0.276527	A0A0H2VI31	224	K	Dihydrolipoyl dehydrogenase	SE_0794
Cellular Component	GO:0045240	3	dihydrolipoyl dehydrogenase complex	0.276527	A0A0H2VI31	111	K	Dihydrolipoyl dehydrogenase	SE_0794
Cellular Component	GO:0045240	3	dihydrolipoyl dehydrogenase complex	0.276527	Q8CP83	572	K	2-oxoglutarate dehydrogenase E1 component	odhA
Cellular Component	GO:0045240	3	dihydrolipoyl dehydrogenase complex	0.276527	Q8CP83	149	K	2-oxoglutarate dehydrogenase E1 component	odhA
Cellular Component	GO:0045240	3	dihydrolipoyl dehydrogenase complex	0.276527	Q8CP83	191	K	2-oxoglutarate dehydrogenase E1 component	odhA
Cellular Component	GO:0045240	3	dihydrolipoyl dehydrogenase complex	0.276527	Q8CP83	859	K	2-oxoglutarate dehydrogenase E1 component	odhA
Cellular Component	GO:0045240	3	dihydrolipoyl dehydrogenase complex	0.276527	Q8CP83	210	K	2-oxoglutarate dehydrogenase E1 component	odhA
Cellular Component	GO:0045240	3	dihydrolipoyl dehydrogenase complex	0.276527	Q8CP83	73	K	2-oxoglutarate dehydrogenase E1 component	odhA
Cellular Component	GO:0045240	3	dihydrolipoyl dehydrogenase complex	0.276527	Q8CP83	898	K	2-oxoglutarate dehydrogenase E1 component	odhA
Cellular Component	GO:0045240	3	dihydrolipoyl dehydrogenase complex	0.276527	Q8CP83	520	K	2-oxoglutarate dehydrogenase E1 component	odhA
Cellular Component	GO:0045240	3	dihydrolipoyl dehydrogenase complex	0.276527	Q8CSL9	239	K	Dihydrolipoyllysine-residue succinyltransferase component of 2-oxoglutarate dehydrogenase complex	odhB
Cellular Component	GO:0045240	3	dihydrolipoyl dehydrogenase complex	0.276527	Q8CSL9	262	K	Dihydrolipoyllysine-residue succinyltransferase component of 2-oxoglutarate dehydrogenase complex	odhB
Cellular Component	GO:0045240	3	dihydrolipoyl dehydrogenase complex	0.276527	Q8CSL9	187	K	Dihydrolipoyllysine-residue succinyltransferase component of 2-oxoglutarate dehydrogenase complex	odhB
Cellular Component	GO:0045240	3	dihydrolipoyl dehydrogenase complex	0.276527	Q8CSL9	404	K	Dihydrolipoyllysine-residue succinyltransferase component of 2-oxoglutarate dehydrogenase complex	odhB
Cellular Component	GO:0044391	3	ribosomal subunit	2.22693e-14	P66175	22	K	50S ribosomal protein L29	rpmC
Cellular Component	GO:0044391	3	ribosomal subunit	2.22693e-14	Q8CS87	99	K	50S ribosomal protein L21	rplU
Cellular Component	GO:0044391	3	ribosomal subunit	2.22693e-14	Q8CS87	70	K	50S ribosomal protein L21	rplU
Cellular Component	GO:0044391	3	ribosomal subunit	2.22693e-14	Q8CRG4	81	K	30S ribosomal protein S19	rpsS
Cellular Component	GO:0044391	3	ribosomal subunit	2.22693e-14	Q8CRG4	27	K	30S ribosomal protein S19	rpsS
Cellular Component	GO:0044391	3	ribosomal subunit	2.22693e-14	Q8CRG4	88	K	30S ribosomal protein S19	rpsS
Cellular Component	GO:0044391	3	ribosomal subunit	2.22693e-14	Q8CRG4	18	K	30S ribosomal protein S19	rpsS
Cellular Component	GO:0044391	3	ribosomal subunit	2.22693e-14	Q8CRG4	56	K	30S ribosomal protein S19	rpsS
Cellular Component	GO:0044391	3	ribosomal subunit	2.22693e-14	Q8CRG4	7	K	30S ribosomal protein S19	rpsS
Cellular Component	GO:0044391	3	ribosomal subunit	2.22693e-14	Q8CRG4	17	K	30S ribosomal protein S19	rpsS
Cellular Component	GO:0044391	3	ribosomal subunit	2.22693e-14	Q8CRH5	158	K	50S ribosomal protein L6	rplF
Cellular Component	GO:0044391	3	ribosomal subunit	2.22693e-14	Q8CRH5	59	K	50S ribosomal protein L6	rplF
Cellular Component	GO:0044391	3	ribosomal subunit	2.22693e-14	Q8CRH5	44	K	50S ribosomal protein L6	rplF
Cellular Component	GO:0044391	3	ribosomal subunit	2.22693e-14	Q8CST2	13	K	30S ribosomal protein S15	rpsO
Cellular Component	GO:0044391	3	ribosomal subunit	2.22693e-14	Q8CRG5	27	K	50S ribosomal protein L22	rplV
Cellular Component	GO:0044391	3	ribosomal subunit	2.22693e-14	Q8CRG5	98	K	50S ribosomal protein L22	rplV
Cellular Component	GO:0044391	3	ribosomal subunit	2.22693e-14	Q8CRG5	83	K	50S ribosomal protein L22	rplV
Cellular Component	GO:0044391	3	ribosomal subunit	2.22693e-14	Q8CRG5	111	K	50S ribosomal protein L22	rplV
Cellular Component	GO:0044391	3	ribosomal subunit	2.22693e-14	Q8CRG7	124	K	50S ribosomal protein L16	rplP
Cellular Component	GO:0044391	3	ribosomal subunit	2.22693e-14	Q8CRG7	98	K	50S ribosomal protein L16	rplP
Cellular Component	GO:0044391	3	ribosomal subunit	2.22693e-14	Q8CRG0	205	K	50S ribosomal protein L3	rplC
Cellular Component	GO:0044391	3	ribosomal subunit	2.22693e-14	Q8CRG0	67	K	50S ribosomal protein L3	rplC
Cellular Component	GO:0044391	3	ribosomal subunit	2.22693e-14	Q8CRG0	39	K	50S ribosomal protein L3	rplC
Cellular Component	GO:0044391	3	ribosomal subunit	2.22693e-14	Q8CRG0	71	K	50S ribosomal protein L3	rplC
Cellular Component	GO:0044391	3	ribosomal subunit	2.22693e-14	Q8CRG0	132	K	50S ribosomal protein L3	rplC
Cellular Component	GO:0044391	3	ribosomal subunit	2.22693e-14	Q8CRG0	125	K	50S ribosomal protein L3	rplC
Cellular Component	GO:0044391	3	ribosomal subunit	2.22693e-14	Q8CRG0	78	K	50S ribosomal protein L3	rplC
Cellular Component	GO:0044391	3	ribosomal subunit	2.22693e-14	Q8CRG0	79	K	50S ribosomal protein L3	rplC
Cellular Component	GO:0044391	3	ribosomal subunit	2.22693e-14	Q8CRJ0	7	K	30S ribosomal protein S9	rpsI
Cellular Component	GO:0044391	3	ribosomal subunit	2.22693e-14	Q8CS77	33	K	50S ribosomal protein L20	rplT
Cellular Component	GO:0044391	3	ribosomal subunit	2.22693e-14	Q8CS77	85	K	50S ribosomal protein L20	rplT
Cellular Component	GO:0044391	3	ribosomal subunit	2.22693e-14	Q8CS77	5	K	50S ribosomal protein L20	rplT
Cellular Component	GO:0044391	3	ribosomal subunit	2.22693e-14	Q8CRG8	18	K	30S ribosomal protein S17	rpsQ
Cellular Component	GO:0044391	3	ribosomal subunit	2.22693e-14	Q8CRG8	73	K	30S ribosomal protein S17	rpsQ
Cellular Component	GO:0044391	3	ribosomal subunit	2.22693e-14	Q8CRG8	47	K	30S ribosomal protein S17	rpsQ
Cellular Component	GO:0044391	3	ribosomal subunit	2.22693e-14	Q8CRH1	84	K	50S ribosomal protein L24	rplX
Cellular Component	GO:0044391	3	ribosomal subunit	2.22693e-14	Q8CRH1	42	K	50S ribosomal protein L24	rplX
Cellular Component	GO:0044391	3	ribosomal subunit	2.22693e-14	Q8CRH1	102	K	50S ribosomal protein L24	rplX
Cellular Component	GO:0044391	3	ribosomal subunit	2.22693e-14	Q8CRH1	96	K	50S ribosomal protein L24	rplX
Cellular Component	GO:0044391	3	ribosomal subunit	2.22693e-14	Q8CRH1	29	K	50S ribosomal protein L24	rplX
Cellular Component	GO:0044391	3	ribosomal subunit	2.22693e-14	Q8CRM8	63	K	50S ribosomal protein L31 type B	rpmE2
Cellular Component	GO:0044391	3	ribosomal subunit	2.22693e-14	Q8CRM8	2	K	50S ribosomal protein L31 type B	rpmE2
Cellular Component	GO:0044391	3	ribosomal subunit	2.22693e-14	P66255	10	K	50S ribosomal protein L34	rpmH
Cellular Component	GO:0044391	3	ribosomal subunit	2.22693e-14	Q8CRH8	21	K	50S ribosomal protein L30	rpmD
Cellular Component	GO:0044391	3	ribosomal subunit	2.22693e-14	Q8CRH8	30	K	50S ribosomal protein L30	rpmD
Cellular Component	GO:0044391	3	ribosomal subunit	2.22693e-14	Q8CRH8	51	K	50S ribosomal protein L30	rpmD
Cellular Component	GO:0044391	3	ribosomal subunit	2.22693e-14	Q8CRH8	29	K	50S ribosomal protein L30	rpmD
Cellular Component	GO:0044391	3	ribosomal subunit	2.22693e-14	Q8CSZ2	37	K	50S ribosomal protein L32	rpmF
Cellular Component	GO:0044391	3	ribosomal subunit	2.22693e-14	Q8CRI2	8	K	50S ribosomal protein L36	rpmJ
Cellular Component	GO:0044391	3	ribosomal subunit	2.22693e-14	Q8CSE3	41	K	50S ribosomal protein L33 1	rpmG1
Cellular Component	GO:0044391	3	ribosomal subunit	2.22693e-14	Q8CTF2	61	K	Ribosome hibernation promotion factor	hpf
Cellular Component	GO:0044391	3	ribosomal subunit	2.22693e-14	Q8CRG6	134	K	30S ribosomal protein S3	rpsC
Cellular Component	GO:0044391	3	ribosomal subunit	2.22693e-14	Q8CRG6	40	K	30S ribosomal protein S3	rpsC
Cellular Component	GO:0044391	3	ribosomal subunit	2.22693e-14	Q8CRG6	97	K	30S ribosomal protein S3	rpsC
Cellular Component	GO:0044391	3	ribosomal subunit	2.22693e-14	Q8CRG6	26	K	30S ribosomal protein S3	rpsC
Cellular Component	GO:0044391	3	ribosomal subunit	2.22693e-14	Q8CRG6	107	K	30S ribosomal protein S3	rpsC
Cellular Component	GO:0044391	3	ribosomal subunit	2.22693e-14	Q8CRG6	47	K	30S ribosomal protein S3	rpsC
Cellular Component	GO:0044391	3	ribosomal subunit	2.22693e-14	Q8CRG6	106	K	30S ribosomal protein S3	rpsC
Cellular Component	GO:0044391	3	ribosomal subunit	2.22693e-14	Q8CRG6	89	K	30S ribosomal protein S3	rpsC
Cellular Component	GO:0044391	3	ribosomal subunit	2.22693e-14	Q8CRG6	96	K	30S ribosomal protein S3	rpsC
Cellular Component	GO:0044391	3	ribosomal subunit	2.22693e-14	Q8CQU8	42	K	50S ribosomal protein L25	rplY
Cellular Component	GO:0044391	3	ribosomal subunit	2.22693e-14	Q8CRI3	64	K	30S ribosomal protein S13	rpsM
Cellular Component	GO:0044391	3	ribosomal subunit	2.22693e-14	Q8CRI3	46	K	30S ribosomal protein S13	rpsM
Cellular Component	GO:0044391	3	ribosomal subunit	2.22693e-14	Q8CRI3	78	K	30S ribosomal protein S13	rpsM
Cellular Component	GO:0044391	3	ribosomal subunit	2.22693e-14	P66523	8	K	30S ribosomal protein S21	rpsU
Cellular Component	GO:0044391	3	ribosomal subunit	2.22693e-14	P66523	40	K	30S ribosomal protein S21	rpsU
Cellular Component	GO:0044391	3	ribosomal subunit	2.22693e-14	P66336	11	K	30S ribosomal protein S10	rpsJ
Cellular Component	GO:0044391	3	ribosomal subunit	2.22693e-14	P66336	57	K	30S ribosomal protein S10	rpsJ
Cellular Component	GO:0044391	3	ribosomal subunit	2.22693e-14	P66336	30	K	30S ribosomal protein S10	rpsJ
Cellular Component	GO:0044391	3	ribosomal subunit	2.22693e-14	P66336	24	K	30S ribosomal protein S10	rpsJ
Cellular Component	GO:0044391	3	ribosomal subunit	2.22693e-14	Q8CRH7	159	K	30S ribosomal protein S5	rpsE
Cellular Component	GO:0044391	3	ribosomal subunit	2.22693e-14	Q8CRH7	69	K	30S ribosomal protein S5	rpsE
Cellular Component	GO:0044391	3	ribosomal subunit	2.22693e-14	Q8CRH7	97	K	30S ribosomal protein S5	rpsE
Cellular Component	GO:0044391	3	ribosomal subunit	2.22693e-14	Q8CRH7	61	K	30S ribosomal protein S5	rpsE
Cellular Component	GO:0044391	3	ribosomal subunit	2.22693e-14	Q8CRH7	9	K	30S ribosomal protein S5	rpsE
Cellular Component	GO:0044391	3	ribosomal subunit	2.22693e-14	Q8CRI5	52	K	50S ribosomal protein L17	rplQ
Cellular Component	GO:0044391	3	ribosomal subunit	2.22693e-14	Q8CRI5	53	K	50S ribosomal protein L17	rplQ
Cellular Component	GO:0044391	3	ribosomal subunit	2.22693e-14	Q8CRI5	64	K	50S ribosomal protein L17	rplQ
Cellular Component	GO:0044391	3	ribosomal subunit	2.22693e-14	Q8CRI5	46	K	50S ribosomal protein L17	rplQ
Cellular Component	GO:0044391	3	ribosomal subunit	2.22693e-14	Q8CRI5	105	K	50S ribosomal protein L17	rplQ
Cellular Component	GO:0044391	3	ribosomal subunit	2.22693e-14	Q8CSV0	88	K	30S ribosomal protein S16	rpsP
Cellular Component	GO:0044391	3	ribosomal subunit	2.22693e-14	Q8CSV0	66	K	30S ribosomal protein S16	rpsP
Cellular Component	GO:0044391	3	ribosomal subunit	2.22693e-14	Q8CSC6	70	K	30S ribosomal protein S20	rpsT
Cellular Component	GO:0044391	3	ribosomal subunit	2.22693e-14	Q8CSC6	46	K	30S ribosomal protein S20	rpsT
Cellular Component	GO:0044391	3	ribosomal subunit	2.22693e-14	Q8CSC6	55	K	30S ribosomal protein S20	rpsT
Cellular Component	GO:0044391	3	ribosomal subunit	2.22693e-14	Q8CRH2	119	K	50S ribosomal protein L5	rplE
Cellular Component	GO:0044391	3	ribosomal subunit	2.22693e-14	Q8CRH2	18	K	50S ribosomal protein L5	rplE
Cellular Component	GO:0044391	3	ribosomal subunit	2.22693e-14	Q8CRH2	72	K	50S ribosomal protein L5	rplE
Cellular Component	GO:0044391	3	ribosomal subunit	2.22693e-14	Q8CRH2	7	K	50S ribosomal protein L5	rplE
Cellular Component	GO:0044391	3	ribosomal subunit	2.22693e-14	Q8CRH2	19	K	50S ribosomal protein L5	rplE
Cellular Component	GO:0044391	3	ribosomal subunit	2.22693e-14	Q8CSP9	41	K	50S ribosomal protein L33 2	rpmG2
Cellular Component	GO:0044391	3	ribosomal subunit	2.22693e-14	Q8CS54	28	K	30S ribosomal protein S4	rpsD
Cellular Component	GO:0044391	3	ribosomal subunit	2.22693e-14	Q8CS54	134	K	30S ribosomal protein S4	rpsD
Cellular Component	GO:0044391	3	ribosomal subunit	2.22693e-14	Q8CS54	144	K	30S ribosomal protein S4	rpsD
Cellular Component	GO:0044391	3	ribosomal subunit	2.22693e-14	Q8CTT2	53	K	50S ribosomal protein L10	rplJ
Cellular Component	GO:0044391	3	ribosomal subunit	2.22693e-14	Q8CTT2	56	K	50S ribosomal protein L10	rplJ
Cellular Component	GO:0044391	3	ribosomal subunit	2.22693e-14	Q8CTT2	101	K	50S ribosomal protein L10	rplJ
Cellular Component	GO:0044391	3	ribosomal subunit	2.22693e-14	Q8CTT2	9	K	50S ribosomal protein L10	rplJ
Cellular Component	GO:0044391	3	ribosomal subunit	2.22693e-14	Q8CTT5	81	K	50S ribosomal protein L11	rplK
Cellular Component	GO:0044391	3	ribosomal subunit	2.22693e-14	Q8CTT5	80	K	50S ribosomal protein L11	rplK
Cellular Component	GO:0044391	3	ribosomal subunit	2.22693e-14	Q8CRG2	74	K	50S ribosomal protein L23	rplW
Cellular Component	GO:0044391	3	ribosomal subunit	2.22693e-14	Q8CRG2	59	K	50S ribosomal protein L23	rplW
Cellular Component	GO:0044391	3	ribosomal subunit	2.22693e-14	Q8CRG2	8	K	50S ribosomal protein L23	rplW
Cellular Component	GO:0044391	3	ribosomal subunit	2.22693e-14	Q8CRG2	83	K	50S ribosomal protein L23	rplW
Cellular Component	GO:0044391	3	ribosomal subunit	2.22693e-14	Q8CRG2	24	K	50S ribosomal protein L23	rplW
Cellular Component	GO:0044391	3	ribosomal subunit	2.22693e-14	P66618	35	K	30S ribosomal protein S7	rpsG
Cellular Component	GO:0044391	3	ribosomal subunit	2.22693e-14	P66618	25	K	30S ribosomal protein S7	rpsG
Cellular Component	GO:0044391	3	ribosomal subunit	2.22693e-14	Q8CSU2	81	K	30S ribosomal protein S2	rpsB
Cellular Component	GO:0044391	3	ribosomal subunit	2.22693e-14	Q8CSU2	74	K	30S ribosomal protein S2	rpsB
Cellular Component	GO:0044391	3	ribosomal subunit	2.22693e-14	Q8CSU2	49	K	30S ribosomal protein S2	rpsB
Cellular Component	GO:0044391	3	ribosomal subunit	2.22693e-14	Q8CSU2	138	K	30S ribosomal protein S2	rpsB
Cellular Component	GO:0044391	3	ribosomal subunit	2.22693e-14	Q8CSU2	132	K	30S ribosomal protein S2	rpsB
Cellular Component	GO:0044391	3	ribosomal subunit	2.22693e-14	Q8CSU2	73	K	30S ribosomal protein S2	rpsB
Cellular Component	GO:0044391	3	ribosomal subunit	2.22693e-14	Q8CSU2	29	K	30S ribosomal protein S2	rpsB
Cellular Component	GO:0044391	3	ribosomal subunit	2.22693e-14	Q8CRG9	53	K	50S ribosomal protein L14	rplN
Cellular Component	GO:0044391	3	ribosomal subunit	2.22693e-14	Q8CRG9	9	K	50S ribosomal protein L14	rplN
Cellular Component	GO:0044391	3	ribosomal subunit	2.22693e-14	Q8CRH4	33	K	30S ribosomal protein S8	rpsH
Cellular Component	GO:0044391	3	ribosomal subunit	2.22693e-14	Q8CRH4	90	K	30S ribosomal protein S8	rpsH
Cellular Component	GO:0044391	3	ribosomal subunit	2.22693e-14	Q8CRH4	78	K	30S ribosomal protein S8	rpsH
Cellular Component	GO:0044391	3	ribosomal subunit	2.22693e-14	Q8CRH4	41	K	30S ribosomal protein S8	rpsH
Cellular Component	GO:0044391	3	ribosomal subunit	2.22693e-14	Q8CRH4	34	K	30S ribosomal protein S8	rpsH
Cellular Component	GO:0044391	3	ribosomal subunit	2.22693e-14	Q8CRH4	56	K	30S ribosomal protein S8	rpsH
Cellular Component	GO:0044391	3	ribosomal subunit	2.22693e-14	Q8CRH4	24	K	30S ribosomal protein S8	rpsH
Cellular Component	GO:0044391	3	ribosomal subunit	2.22693e-14	Q8CRH4	65	K	30S ribosomal protein S8	rpsH
Cellular Component	GO:0044391	3	ribosomal subunit	2.22693e-14	Q8CRH4	82	K	30S ribosomal protein S8	rpsH
Cellular Component	GO:0044391	3	ribosomal subunit	2.22693e-14	Q8CSU9	85	K	50S ribosomal protein L19	rplS
Cellular Component	GO:0044391	3	ribosomal subunit	2.22693e-14	Q8CSU9	65	K	50S ribosomal protein L19	rplS
Cellular Component	GO:0044391	3	ribosomal subunit	2.22693e-14	Q8CRH6	38	K	50S ribosomal protein L18	rplR
Cellular Component	GO:0044391	3	ribosomal subunit	2.22693e-14	Q8CRH6	28	K	50S ribosomal protein L18	rplR
Cellular Component	GO:0044391	3	ribosomal subunit	2.22693e-14	Q8CRH6	21	K	50S ribosomal protein L18	rplR
Cellular Component	GO:0044391	3	ribosomal subunit	2.22693e-14	Q8CRH6	83	K	50S ribosomal protein L18	rplR
Cellular Component	GO:0044391	3	ribosomal subunit	2.22693e-14	Q8CRH6	61	K	50S ribosomal protein L18	rplR
Cellular Component	GO:0044391	3	ribosomal subunit	2.22693e-14	Q8CRH6	107	K	50S ribosomal protein L18	rplR
Cellular Component	GO:0044391	3	ribosomal subunit	2.22693e-14	Q8CQP4	19	K	30S ribosomal protein S6	rpsF
Cellular Component	GO:0044391	3	ribosomal subunit	2.22693e-14	Q8CQP6	35	K	30S ribosomal protein S18	rpsR
Cellular Component	GO:0044391	3	ribosomal subunit	2.22693e-14	Q8CQP6	77	K	30S ribosomal protein S18	rpsR
Cellular Component	GO:0044391	3	ribosomal subunit	2.22693e-14	Q8CQP6	65	K	30S ribosomal protein S18	rpsR
Cellular Component	GO:0044391	3	ribosomal subunit	2.22693e-14	Q8CQP6	55	K	30S ribosomal protein S18	rpsR
Cellular Component	GO:0044391	3	ribosomal subunit	2.22693e-14	Q8CS89	76	K	50S ribosomal protein L27	rpmA
Cellular Component	GO:0044391	3	ribosomal subunit	2.22693e-14	Q8CS76	65	K	50S ribosomal protein L35	rpmI
Cellular Component	GO:0044391	3	ribosomal subunit	2.22693e-14	Q8CRI9	69	K	50S ribosomal protein L13	rplM
Cellular Component	GO:0044391	3	ribosomal subunit	2.22693e-14	Q8CRI9	94	K	50S ribosomal protein L13	rplM
Cellular Component	GO:0044391	3	ribosomal subunit	2.22693e-14	Q8CRI9	122	K	50S ribosomal protein L13	rplM
Cellular Component	GO:0044391	3	ribosomal subunit	2.22693e-14	Q8CRI9	15	K	50S ribosomal protein L13	rplM
Cellular Component	GO:0044391	3	ribosomal subunit	2.22693e-14	Q8CRG1	52	K	50S ribosomal protein L4	rplD
Cellular Component	GO:0044391	3	ribosomal subunit	2.22693e-14	Q8CRG1	201	K	50S ribosomal protein L4	rplD
Cellular Component	GO:0044391	3	ribosomal subunit	2.22693e-14	Q8CRG1	140	K	50S ribosomal protein L4	rplD
Cellular Component	GO:0044391	3	ribosomal subunit	2.22693e-14	Q8CRG1	150	K	50S ribosomal protein L4	rplD
Cellular Component	GO:0044391	3	ribosomal subunit	2.22693e-14	Q8CRG3	252	K	50S ribosomal protein L2	rplB
Cellular Component	GO:0044391	3	ribosomal subunit	2.22693e-14	Q8CRG3	71	K	50S ribosomal protein L2	rplB
Cellular Component	GO:0044391	3	ribosomal subunit	2.22693e-14	Q8CRG3	7	K	50S ribosomal protein L2	rplB
Cellular Component	GO:0044391	3	ribosomal subunit	2.22693e-14	Q8CRG3	268	K	50S ribosomal protein L2	rplB
Cellular Component	GO:0044391	3	ribosomal subunit	2.22693e-14	Q8CRG3	31	K	50S ribosomal protein L2	rplB
Cellular Component	GO:0044391	3	ribosomal subunit	2.22693e-14	Q8CTT4	151	K	50S ribosomal protein L1	rplA
Cellular Component	GO:0044391	3	ribosomal subunit	2.22693e-14	Q8CTT4	7	K	50S ribosomal protein L1	rplA
Cellular Component	GO:0044391	3	ribosomal subunit	2.22693e-14	Q8CTT4	230	K	50S ribosomal protein L1	rplA
Cellular Component	GO:0044391	3	ribosomal subunit	2.22693e-14	Q8CTT4	160	K	50S ribosomal protein L1	rplA
Cellular Component	GO:0044391	3	ribosomal subunit	2.22693e-14	Q8CTT4	150	K	50S ribosomal protein L1	rplA
Cellular Component	GO:0044391	3	ribosomal subunit	2.22693e-14	Q8CTT4	54	K	50S ribosomal protein L1	rplA
Cellular Component	GO:0044391	3	ribosomal subunit	2.22693e-14	Q8CTT4	14	K	50S ribosomal protein L1	rplA
Cellular Component	GO:0044391	3	ribosomal subunit	2.22693e-14	Q8CU90	109	K	50S ribosomal protein L9	rplI
Cellular Component	GO:0044391	3	ribosomal subunit	2.22693e-14	Q8CU90	69	K	50S ribosomal protein L9	rplI
Cellular Component	GO:0044391	3	ribosomal subunit	2.22693e-14	Q8CU90	52	K	50S ribosomal protein L9	rplI
Cellular Component	GO:0044391	3	ribosomal subunit	2.22693e-14	Q8CU90	103	K	50S ribosomal protein L9	rplI
Cellular Component	GO:0044391	3	ribosomal subunit	2.22693e-14	Q8CU90	34	K	50S ribosomal protein L9	rplI
Cellular Component	GO:0044391	3	ribosomal subunit	2.22693e-14	Q8CU90	73	K	50S ribosomal protein L9	rplI
Cellular Component	GO:0044391	3	ribosomal subunit	2.22693e-14	Q8CRH9	124	K	50S ribosomal protein L15	rplO
Cellular Component	GO:0044391	3	ribosomal subunit	2.22693e-14	Q8CRH9	119	K	50S ribosomal protein L15	rplO
Cellular Component	GO:0044391	3	ribosomal subunit	2.22693e-14	Q8CRH9	106	K	50S ribosomal protein L15	rplO
Cellular Component	GO:0044391	3	ribosomal subunit	2.22693e-14	Q8CRH9	7	K	50S ribosomal protein L15	rplO
Cellular Component	GO:0044391	3	ribosomal subunit	2.22693e-14	Q8CRH9	2	K	50S ribosomal protein L15	rplO
Cellular Component	GO:0031235	4	intrinsic component of the cytoplasmic side of the plasma membrane	0.226043	A0A0H2VJ83	70	K	Nitrate reductase beta chain narH	SE_1974
Cellular Component	GO:0031235	4	intrinsic component of the cytoplasmic side of the plasma membrane	0.226043	A0A0H2VJ83	290	K	Nitrate reductase beta chain narH	SE_1974
Cellular Component	GO:0031235	4	intrinsic component of the cytoplasmic side of the plasma membrane	0.226043	A0A0H2VHP1	1070	K	Respiratory nitrate reductase alpha chain	SE_1975
Cellular Component	GO:0031235	4	intrinsic component of the cytoplasmic side of the plasma membrane	0.226043	A0A0H2VHP1	10	K	Respiratory nitrate reductase alpha chain	SE_1975
Cellular Component	GO:0031235	4	intrinsic component of the cytoplasmic side of the plasma membrane	0.226043	A0A0H2VHP1	107	K	Respiratory nitrate reductase alpha chain	SE_1975
Cellular Component	GO:0043229	3	intracellular organelle	9.71125e-11	P66175	22	K	50S ribosomal protein L29	rpmC
Cellular Component	GO:0043229	3	intracellular organelle	9.71125e-11	Q8CS87	99	K	50S ribosomal protein L21	rplU
Cellular Component	GO:0043229	3	intracellular organelle	9.71125e-11	Q8CS87	70	K	50S ribosomal protein L21	rplU
Cellular Component	GO:0043229	3	intracellular organelle	9.71125e-11	Q8CRG4	81	K	30S ribosomal protein S19	rpsS
Cellular Component	GO:0043229	3	intracellular organelle	9.71125e-11	Q8CRG4	27	K	30S ribosomal protein S19	rpsS
Cellular Component	GO:0043229	3	intracellular organelle	9.71125e-11	Q8CRG4	88	K	30S ribosomal protein S19	rpsS
Cellular Component	GO:0043229	3	intracellular organelle	9.71125e-11	Q8CRG4	18	K	30S ribosomal protein S19	rpsS
Cellular Component	GO:0043229	3	intracellular organelle	9.71125e-11	Q8CRG4	56	K	30S ribosomal protein S19	rpsS
Cellular Component	GO:0043229	3	intracellular organelle	9.71125e-11	Q8CRG4	7	K	30S ribosomal protein S19	rpsS
Cellular Component	GO:0043229	3	intracellular organelle	9.71125e-11	Q8CRG4	17	K	30S ribosomal protein S19	rpsS
Cellular Component	GO:0043229	3	intracellular organelle	9.71125e-11	Q8CRH5	158	K	50S ribosomal protein L6	rplF
Cellular Component	GO:0043229	3	intracellular organelle	9.71125e-11	Q8CRH5	59	K	50S ribosomal protein L6	rplF
Cellular Component	GO:0043229	3	intracellular organelle	9.71125e-11	Q8CRH5	44	K	50S ribosomal protein L6	rplF
Cellular Component	GO:0043229	3	intracellular organelle	9.71125e-11	Q8CST2	13	K	30S ribosomal protein S15	rpsO
Cellular Component	GO:0043229	3	intracellular organelle	9.71125e-11	Q8CRG5	27	K	50S ribosomal protein L22	rplV
Cellular Component	GO:0043229	3	intracellular organelle	9.71125e-11	Q8CRG5	98	K	50S ribosomal protein L22	rplV
Cellular Component	GO:0043229	3	intracellular organelle	9.71125e-11	Q8CRG5	83	K	50S ribosomal protein L22	rplV
Cellular Component	GO:0043229	3	intracellular organelle	9.71125e-11	Q8CRG5	111	K	50S ribosomal protein L22	rplV
Cellular Component	GO:0043229	3	intracellular organelle	9.71125e-11	Q8CRG7	124	K	50S ribosomal protein L16	rplP
Cellular Component	GO:0043229	3	intracellular organelle	9.71125e-11	Q8CRG7	98	K	50S ribosomal protein L16	rplP
Cellular Component	GO:0043229	3	intracellular organelle	9.71125e-11	A0A0H2VGE6	365	K	DEAD-box ATP-dependent RNA helicase CshB	cshB
Cellular Component	GO:0043229	3	intracellular organelle	9.71125e-11	A0A0H2VGE6	26	K	DEAD-box ATP-dependent RNA helicase CshB	cshB
Cellular Component	GO:0043229	3	intracellular organelle	9.71125e-11	Q8CRG0	205	K	50S ribosomal protein L3	rplC
Cellular Component	GO:0043229	3	intracellular organelle	9.71125e-11	Q8CRG0	67	K	50S ribosomal protein L3	rplC
Cellular Component	GO:0043229	3	intracellular organelle	9.71125e-11	Q8CRG0	39	K	50S ribosomal protein L3	rplC
Cellular Component	GO:0043229	3	intracellular organelle	9.71125e-11	Q8CRG0	71	K	50S ribosomal protein L3	rplC
Cellular Component	GO:0043229	3	intracellular organelle	9.71125e-11	Q8CRG0	132	K	50S ribosomal protein L3	rplC
Cellular Component	GO:0043229	3	intracellular organelle	9.71125e-11	Q8CRG0	125	K	50S ribosomal protein L3	rplC
Cellular Component	GO:0043229	3	intracellular organelle	9.71125e-11	Q8CRG0	78	K	50S ribosomal protein L3	rplC
Cellular Component	GO:0043229	3	intracellular organelle	9.71125e-11	Q8CRG0	79	K	50S ribosomal protein L3	rplC
Cellular Component	GO:0043229	3	intracellular organelle	9.71125e-11	Q8CRJ0	7	K	30S ribosomal protein S9	rpsI
Cellular Component	GO:0043229	3	intracellular organelle	9.71125e-11	Q8CS77	33	K	50S ribosomal protein L20	rplT
Cellular Component	GO:0043229	3	intracellular organelle	9.71125e-11	Q8CS77	85	K	50S ribosomal protein L20	rplT
Cellular Component	GO:0043229	3	intracellular organelle	9.71125e-11	Q8CS77	5	K	50S ribosomal protein L20	rplT
Cellular Component	GO:0043229	3	intracellular organelle	9.71125e-11	Q8CRG8	18	K	30S ribosomal protein S17	rpsQ
Cellular Component	GO:0043229	3	intracellular organelle	9.71125e-11	Q8CRG8	73	K	30S ribosomal protein S17	rpsQ
Cellular Component	GO:0043229	3	intracellular organelle	9.71125e-11	Q8CRG8	47	K	30S ribosomal protein S17	rpsQ
Cellular Component	GO:0043229	3	intracellular organelle	9.71125e-11	Q8CRP6	284	K	DEAD-box ATP-dependent RNA helicase CshA	cshA
Cellular Component	GO:0043229	3	intracellular organelle	9.71125e-11	Q8CRH1	84	K	50S ribosomal protein L24	rplX
Cellular Component	GO:0043229	3	intracellular organelle	9.71125e-11	Q8CRH1	42	K	50S ribosomal protein L24	rplX
Cellular Component	GO:0043229	3	intracellular organelle	9.71125e-11	Q8CRH1	102	K	50S ribosomal protein L24	rplX
Cellular Component	GO:0043229	3	intracellular organelle	9.71125e-11	Q8CRH1	96	K	50S ribosomal protein L24	rplX
Cellular Component	GO:0043229	3	intracellular organelle	9.71125e-11	Q8CRH1	29	K	50S ribosomal protein L24	rplX
Cellular Component	GO:0043229	3	intracellular organelle	9.71125e-11	Q8CRM8	63	K	50S ribosomal protein L31 type B	rpmE2
Cellular Component	GO:0043229	3	intracellular organelle	9.71125e-11	Q8CRM8	2	K	50S ribosomal protein L31 type B	rpmE2
Cellular Component	GO:0043229	3	intracellular organelle	9.71125e-11	P66255	10	K	50S ribosomal protein L34	rpmH
Cellular Component	GO:0043229	3	intracellular organelle	9.71125e-11	Q8CRH8	21	K	50S ribosomal protein L30	rpmD
Cellular Component	GO:0043229	3	intracellular organelle	9.71125e-11	Q8CRH8	30	K	50S ribosomal protein L30	rpmD
Cellular Component	GO:0043229	3	intracellular organelle	9.71125e-11	Q8CRH8	51	K	50S ribosomal protein L30	rpmD
Cellular Component	GO:0043229	3	intracellular organelle	9.71125e-11	Q8CRH8	29	K	50S ribosomal protein L30	rpmD
Cellular Component	GO:0043229	3	intracellular organelle	9.71125e-11	Q8CSZ2	37	K	50S ribosomal protein L32	rpmF
Cellular Component	GO:0043229	3	intracellular organelle	9.71125e-11	Q8CRI2	8	K	50S ribosomal protein L36	rpmJ
Cellular Component	GO:0043229	3	intracellular organelle	9.71125e-11	Q8CSE3	41	K	50S ribosomal protein L33 1	rpmG1
Cellular Component	GO:0043229	3	intracellular organelle	9.71125e-11	Q8CTF2	61	K	Ribosome hibernation promotion factor	hpf
Cellular Component	GO:0043229	3	intracellular organelle	9.71125e-11	Q8CRG6	134	K	30S ribosomal protein S3	rpsC
Cellular Component	GO:0043229	3	intracellular organelle	9.71125e-11	Q8CRG6	40	K	30S ribosomal protein S3	rpsC
Cellular Component	GO:0043229	3	intracellular organelle	9.71125e-11	Q8CRG6	97	K	30S ribosomal protein S3	rpsC
Cellular Component	GO:0043229	3	intracellular organelle	9.71125e-11	Q8CRG6	26	K	30S ribosomal protein S3	rpsC
Cellular Component	GO:0043229	3	intracellular organelle	9.71125e-11	Q8CRG6	107	K	30S ribosomal protein S3	rpsC
Cellular Component	GO:0043229	3	intracellular organelle	9.71125e-11	Q8CRG6	47	K	30S ribosomal protein S3	rpsC
Cellular Component	GO:0043229	3	intracellular organelle	9.71125e-11	Q8CRG6	106	K	30S ribosomal protein S3	rpsC
Cellular Component	GO:0043229	3	intracellular organelle	9.71125e-11	Q8CRG6	89	K	30S ribosomal protein S3	rpsC
Cellular Component	GO:0043229	3	intracellular organelle	9.71125e-11	Q8CRG6	96	K	30S ribosomal protein S3	rpsC
Cellular Component	GO:0043229	3	intracellular organelle	9.71125e-11	Q8CQU8	42	K	50S ribosomal protein L25	rplY
Cellular Component	GO:0043229	3	intracellular organelle	9.71125e-11	Q8CRI3	64	K	30S ribosomal protein S13	rpsM
Cellular Component	GO:0043229	3	intracellular organelle	9.71125e-11	Q8CRI3	46	K	30S ribosomal protein S13	rpsM
Cellular Component	GO:0043229	3	intracellular organelle	9.71125e-11	Q8CRI3	78	K	30S ribosomal protein S13	rpsM
Cellular Component	GO:0043229	3	intracellular organelle	9.71125e-11	P66523	8	K	30S ribosomal protein S21	rpsU
Cellular Component	GO:0043229	3	intracellular organelle	9.71125e-11	P66523	40	K	30S ribosomal protein S21	rpsU
Cellular Component	GO:0043229	3	intracellular organelle	9.71125e-11	P66336	11	K	30S ribosomal protein S10	rpsJ
Cellular Component	GO:0043229	3	intracellular organelle	9.71125e-11	P66336	57	K	30S ribosomal protein S10	rpsJ
Cellular Component	GO:0043229	3	intracellular organelle	9.71125e-11	P66336	30	K	30S ribosomal protein S10	rpsJ
Cellular Component	GO:0043229	3	intracellular organelle	9.71125e-11	P66336	24	K	30S ribosomal protein S10	rpsJ
Cellular Component	GO:0043229	3	intracellular organelle	9.71125e-11	Q8CRH7	159	K	30S ribosomal protein S5	rpsE
Cellular Component	GO:0043229	3	intracellular organelle	9.71125e-11	Q8CRH7	69	K	30S ribosomal protein S5	rpsE
Cellular Component	GO:0043229	3	intracellular organelle	9.71125e-11	Q8CRH7	97	K	30S ribosomal protein S5	rpsE
Cellular Component	GO:0043229	3	intracellular organelle	9.71125e-11	Q8CRH7	61	K	30S ribosomal protein S5	rpsE
Cellular Component	GO:0043229	3	intracellular organelle	9.71125e-11	Q8CRH7	9	K	30S ribosomal protein S5	rpsE
Cellular Component	GO:0043229	3	intracellular organelle	9.71125e-11	A0A0H2VI31	161	K	Dihydrolipoyl dehydrogenase	SE_0794
Cellular Component	GO:0043229	3	intracellular organelle	9.71125e-11	A0A0H2VI31	34	K	Dihydrolipoyl dehydrogenase	SE_0794
Cellular Component	GO:0043229	3	intracellular organelle	9.71125e-11	A0A0H2VI31	379	K	Dihydrolipoyl dehydrogenase	SE_0794
Cellular Component	GO:0043229	3	intracellular organelle	9.71125e-11	A0A0H2VI31	376	K	Dihydrolipoyl dehydrogenase	SE_0794
Cellular Component	GO:0043229	3	intracellular organelle	9.71125e-11	A0A0H2VI31	230	K	Dihydrolipoyl dehydrogenase	SE_0794
Cellular Component	GO:0043229	3	intracellular organelle	9.71125e-11	A0A0H2VI31	224	K	Dihydrolipoyl dehydrogenase	SE_0794
Cellular Component	GO:0043229	3	intracellular organelle	9.71125e-11	A0A0H2VI31	111	K	Dihydrolipoyl dehydrogenase	SE_0794
Cellular Component	GO:0043229	3	intracellular organelle	9.71125e-11	Q8CRI5	52	K	50S ribosomal protein L17	rplQ
Cellular Component	GO:0043229	3	intracellular organelle	9.71125e-11	Q8CRI5	53	K	50S ribosomal protein L17	rplQ
Cellular Component	GO:0043229	3	intracellular organelle	9.71125e-11	Q8CRI5	64	K	50S ribosomal protein L17	rplQ
Cellular Component	GO:0043229	3	intracellular organelle	9.71125e-11	Q8CRI5	46	K	50S ribosomal protein L17	rplQ
Cellular Component	GO:0043229	3	intracellular organelle	9.71125e-11	Q8CRI5	105	K	50S ribosomal protein L17	rplQ
Cellular Component	GO:0043229	3	intracellular organelle	9.71125e-11	Q8CSV0	88	K	30S ribosomal protein S16	rpsP
Cellular Component	GO:0043229	3	intracellular organelle	9.71125e-11	Q8CSV0	66	K	30S ribosomal protein S16	rpsP
Cellular Component	GO:0043229	3	intracellular organelle	9.71125e-11	Q8CSC6	70	K	30S ribosomal protein S20	rpsT
Cellular Component	GO:0043229	3	intracellular organelle	9.71125e-11	Q8CSC6	46	K	30S ribosomal protein S20	rpsT
Cellular Component	GO:0043229	3	intracellular organelle	9.71125e-11	Q8CSC6	55	K	30S ribosomal protein S20	rpsT
Cellular Component	GO:0043229	3	intracellular organelle	9.71125e-11	Q8CRH2	119	K	50S ribosomal protein L5	rplE
Cellular Component	GO:0043229	3	intracellular organelle	9.71125e-11	Q8CRH2	18	K	50S ribosomal protein L5	rplE
Cellular Component	GO:0043229	3	intracellular organelle	9.71125e-11	Q8CRH2	72	K	50S ribosomal protein L5	rplE
Cellular Component	GO:0043229	3	intracellular organelle	9.71125e-11	Q8CRH2	7	K	50S ribosomal protein L5	rplE
Cellular Component	GO:0043229	3	intracellular organelle	9.71125e-11	Q8CRH2	19	K	50S ribosomal protein L5	rplE
Cellular Component	GO:0043229	3	intracellular organelle	9.71125e-11	Q8CSP9	41	K	50S ribosomal protein L33 2	rpmG2
Cellular Component	GO:0043229	3	intracellular organelle	9.71125e-11	Q8CS54	28	K	30S ribosomal protein S4	rpsD
Cellular Component	GO:0043229	3	intracellular organelle	9.71125e-11	Q8CS54	134	K	30S ribosomal protein S4	rpsD
Cellular Component	GO:0043229	3	intracellular organelle	9.71125e-11	Q8CS54	144	K	30S ribosomal protein S4	rpsD
Cellular Component	GO:0043229	3	intracellular organelle	9.71125e-11	Q8CTT2	53	K	50S ribosomal protein L10	rplJ
Cellular Component	GO:0043229	3	intracellular organelle	9.71125e-11	Q8CTT2	56	K	50S ribosomal protein L10	rplJ
Cellular Component	GO:0043229	3	intracellular organelle	9.71125e-11	Q8CTT2	101	K	50S ribosomal protein L10	rplJ
Cellular Component	GO:0043229	3	intracellular organelle	9.71125e-11	Q8CTT2	9	K	50S ribosomal protein L10	rplJ
Cellular Component	GO:0043229	3	intracellular organelle	9.71125e-11	Q8CTT5	81	K	50S ribosomal protein L11	rplK
Cellular Component	GO:0043229	3	intracellular organelle	9.71125e-11	Q8CTT5	80	K	50S ribosomal protein L11	rplK
Cellular Component	GO:0043229	3	intracellular organelle	9.71125e-11	Q8CRG2	74	K	50S ribosomal protein L23	rplW
Cellular Component	GO:0043229	3	intracellular organelle	9.71125e-11	Q8CRG2	59	K	50S ribosomal protein L23	rplW
Cellular Component	GO:0043229	3	intracellular organelle	9.71125e-11	Q8CRG2	8	K	50S ribosomal protein L23	rplW
Cellular Component	GO:0043229	3	intracellular organelle	9.71125e-11	Q8CRG2	83	K	50S ribosomal protein L23	rplW
Cellular Component	GO:0043229	3	intracellular organelle	9.71125e-11	Q8CRG2	24	K	50S ribosomal protein L23	rplW
Cellular Component	GO:0043229	3	intracellular organelle	9.71125e-11	P66618	35	K	30S ribosomal protein S7	rpsG
Cellular Component	GO:0043229	3	intracellular organelle	9.71125e-11	P66618	25	K	30S ribosomal protein S7	rpsG
Cellular Component	GO:0043229	3	intracellular organelle	9.71125e-11	Q8CSU2	81	K	30S ribosomal protein S2	rpsB
Cellular Component	GO:0043229	3	intracellular organelle	9.71125e-11	Q8CSU2	74	K	30S ribosomal protein S2	rpsB
Cellular Component	GO:0043229	3	intracellular organelle	9.71125e-11	Q8CSU2	49	K	30S ribosomal protein S2	rpsB
Cellular Component	GO:0043229	3	intracellular organelle	9.71125e-11	Q8CSU2	138	K	30S ribosomal protein S2	rpsB
Cellular Component	GO:0043229	3	intracellular organelle	9.71125e-11	Q8CSU2	132	K	30S ribosomal protein S2	rpsB
Cellular Component	GO:0043229	3	intracellular organelle	9.71125e-11	Q8CSU2	73	K	30S ribosomal protein S2	rpsB
Cellular Component	GO:0043229	3	intracellular organelle	9.71125e-11	Q8CSU2	29	K	30S ribosomal protein S2	rpsB
Cellular Component	GO:0043229	3	intracellular organelle	9.71125e-11	Q8CRG9	53	K	50S ribosomal protein L14	rplN
Cellular Component	GO:0043229	3	intracellular organelle	9.71125e-11	Q8CRG9	9	K	50S ribosomal protein L14	rplN
Cellular Component	GO:0043229	3	intracellular organelle	9.71125e-11	Q8CRH4	33	K	30S ribosomal protein S8	rpsH
Cellular Component	GO:0043229	3	intracellular organelle	9.71125e-11	Q8CRH4	90	K	30S ribosomal protein S8	rpsH
Cellular Component	GO:0043229	3	intracellular organelle	9.71125e-11	Q8CRH4	78	K	30S ribosomal protein S8	rpsH
Cellular Component	GO:0043229	3	intracellular organelle	9.71125e-11	Q8CRH4	41	K	30S ribosomal protein S8	rpsH
Cellular Component	GO:0043229	3	intracellular organelle	9.71125e-11	Q8CRH4	34	K	30S ribosomal protein S8	rpsH
Cellular Component	GO:0043229	3	intracellular organelle	9.71125e-11	Q8CRH4	56	K	30S ribosomal protein S8	rpsH
Cellular Component	GO:0043229	3	intracellular organelle	9.71125e-11	Q8CRH4	24	K	30S ribosomal protein S8	rpsH
Cellular Component	GO:0043229	3	intracellular organelle	9.71125e-11	Q8CRH4	65	K	30S ribosomal protein S8	rpsH
Cellular Component	GO:0043229	3	intracellular organelle	9.71125e-11	Q8CRH4	82	K	30S ribosomal protein S8	rpsH
Cellular Component	GO:0043229	3	intracellular organelle	9.71125e-11	Q8CSU9	85	K	50S ribosomal protein L19	rplS
Cellular Component	GO:0043229	3	intracellular organelle	9.71125e-11	Q8CSU9	65	K	50S ribosomal protein L19	rplS
Cellular Component	GO:0043229	3	intracellular organelle	9.71125e-11	Q8CRH6	38	K	50S ribosomal protein L18	rplR
Cellular Component	GO:0043229	3	intracellular organelle	9.71125e-11	Q8CRH6	28	K	50S ribosomal protein L18	rplR
Cellular Component	GO:0043229	3	intracellular organelle	9.71125e-11	Q8CRH6	21	K	50S ribosomal protein L18	rplR
Cellular Component	GO:0043229	3	intracellular organelle	9.71125e-11	Q8CRH6	83	K	50S ribosomal protein L18	rplR
Cellular Component	GO:0043229	3	intracellular organelle	9.71125e-11	Q8CRH6	61	K	50S ribosomal protein L18	rplR
Cellular Component	GO:0043229	3	intracellular organelle	9.71125e-11	Q8CRH6	107	K	50S ribosomal protein L18	rplR
Cellular Component	GO:0043229	3	intracellular organelle	9.71125e-11	Q8CPH4	243	K	Succinate--CoA ligase [ADP-forming] subunit alpha	sucD
Cellular Component	GO:0043229	3	intracellular organelle	9.71125e-11	Q8CPH4	145	K	Succinate--CoA ligase [ADP-forming] subunit alpha	sucD
Cellular Component	GO:0043229	3	intracellular organelle	9.71125e-11	Q8CPH4	144	K	Succinate--CoA ligase [ADP-forming] subunit alpha	sucD
Cellular Component	GO:0043229	3	intracellular organelle	9.71125e-11	Q8CPH4	7	K	Succinate--CoA ligase [ADP-forming] subunit alpha	sucD
Cellular Component	GO:0043229	3	intracellular organelle	9.71125e-11	Q8CPH4	301	K	Succinate--CoA ligase [ADP-forming] subunit alpha	sucD
Cellular Component	GO:0043229	3	intracellular organelle	9.71125e-11	Q8CTS8	101	K	30S ribosomal protein S12	rpsL
Cellular Component	GO:0043229	3	intracellular organelle	9.71125e-11	Q8CTS8	43	K	30S ribosomal protein S12	rpsL
Cellular Component	GO:0043229	3	intracellular organelle	9.71125e-11	Q8CTS8	17	K	30S ribosomal protein S12	rpsL
Cellular Component	GO:0043229	3	intracellular organelle	9.71125e-11	Q8CQP4	19	K	30S ribosomal protein S6	rpsF
Cellular Component	GO:0043229	3	intracellular organelle	9.71125e-11	Q8CQP6	35	K	30S ribosomal protein S18	rpsR
Cellular Component	GO:0043229	3	intracellular organelle	9.71125e-11	Q8CQP6	77	K	30S ribosomal protein S18	rpsR
Cellular Component	GO:0043229	3	intracellular organelle	9.71125e-11	Q8CQP6	65	K	30S ribosomal protein S18	rpsR
Cellular Component	GO:0043229	3	intracellular organelle	9.71125e-11	Q8CQP6	55	K	30S ribosomal protein S18	rpsR
Cellular Component	GO:0043229	3	intracellular organelle	9.71125e-11	Q8CS89	76	K	50S ribosomal protein L27	rpmA
Cellular Component	GO:0043229	3	intracellular organelle	9.71125e-11	Q8CS76	65	K	50S ribosomal protein L35	rpmI
Cellular Component	GO:0043229	3	intracellular organelle	9.71125e-11	Q8CRI9	69	K	50S ribosomal protein L13	rplM
Cellular Component	GO:0043229	3	intracellular organelle	9.71125e-11	Q8CRI9	94	K	50S ribosomal protein L13	rplM
Cellular Component	GO:0043229	3	intracellular organelle	9.71125e-11	Q8CRI9	122	K	50S ribosomal protein L13	rplM
Cellular Component	GO:0043229	3	intracellular organelle	9.71125e-11	Q8CRI9	15	K	50S ribosomal protein L13	rplM
Cellular Component	GO:0043229	3	intracellular organelle	9.71125e-11	Q8CRG1	52	K	50S ribosomal protein L4	rplD
Cellular Component	GO:0043229	3	intracellular organelle	9.71125e-11	Q8CRG1	201	K	50S ribosomal protein L4	rplD
Cellular Component	GO:0043229	3	intracellular organelle	9.71125e-11	Q8CRG1	140	K	50S ribosomal protein L4	rplD
Cellular Component	GO:0043229	3	intracellular organelle	9.71125e-11	Q8CRG1	150	K	50S ribosomal protein L4	rplD
Cellular Component	GO:0043229	3	intracellular organelle	9.71125e-11	Q8CRG3	252	K	50S ribosomal protein L2	rplB
Cellular Component	GO:0043229	3	intracellular organelle	9.71125e-11	Q8CRG3	71	K	50S ribosomal protein L2	rplB
Cellular Component	GO:0043229	3	intracellular organelle	9.71125e-11	Q8CRG3	7	K	50S ribosomal protein L2	rplB
Cellular Component	GO:0043229	3	intracellular organelle	9.71125e-11	Q8CRG3	268	K	50S ribosomal protein L2	rplB
Cellular Component	GO:0043229	3	intracellular organelle	9.71125e-11	Q8CRG3	31	K	50S ribosomal protein L2	rplB
Cellular Component	GO:0043229	3	intracellular organelle	9.71125e-11	Q8CTT4	151	K	50S ribosomal protein L1	rplA
Cellular Component	GO:0043229	3	intracellular organelle	9.71125e-11	Q8CTT4	7	K	50S ribosomal protein L1	rplA
Cellular Component	GO:0043229	3	intracellular organelle	9.71125e-11	Q8CTT4	230	K	50S ribosomal protein L1	rplA
Cellular Component	GO:0043229	3	intracellular organelle	9.71125e-11	Q8CTT4	160	K	50S ribosomal protein L1	rplA
Cellular Component	GO:0043229	3	intracellular organelle	9.71125e-11	Q8CTT4	150	K	50S ribosomal protein L1	rplA
Cellular Component	GO:0043229	3	intracellular organelle	9.71125e-11	Q8CTT4	54	K	50S ribosomal protein L1	rplA
Cellular Component	GO:0043229	3	intracellular organelle	9.71125e-11	Q8CTT4	14	K	50S ribosomal protein L1	rplA
Cellular Component	GO:0043229	3	intracellular organelle	9.71125e-11	A0A0H2VKZ1	267	K	Transcription terminator	SE_2378
Cellular Component	GO:0043229	3	intracellular organelle	9.71125e-11	Q8CU90	109	K	50S ribosomal protein L9	rplI
Cellular Component	GO:0043229	3	intracellular organelle	9.71125e-11	Q8CU90	69	K	50S ribosomal protein L9	rplI
Cellular Component	GO:0043229	3	intracellular organelle	9.71125e-11	Q8CU90	52	K	50S ribosomal protein L9	rplI
Cellular Component	GO:0043229	3	intracellular organelle	9.71125e-11	Q8CU90	103	K	50S ribosomal protein L9	rplI
Cellular Component	GO:0043229	3	intracellular organelle	9.71125e-11	Q8CU90	34	K	50S ribosomal protein L9	rplI
Cellular Component	GO:0043229	3	intracellular organelle	9.71125e-11	Q8CU90	73	K	50S ribosomal protein L9	rplI
Cellular Component	GO:0043229	3	intracellular organelle	9.71125e-11	Q8CRH9	124	K	50S ribosomal protein L15	rplO
Cellular Component	GO:0043229	3	intracellular organelle	9.71125e-11	Q8CRH9	119	K	50S ribosomal protein L15	rplO
Cellular Component	GO:0043229	3	intracellular organelle	9.71125e-11	Q8CRH9	106	K	50S ribosomal protein L15	rplO
Cellular Component	GO:0043229	3	intracellular organelle	9.71125e-11	Q8CRH9	7	K	50S ribosomal protein L15	rplO
Cellular Component	GO:0043229	3	intracellular organelle	9.71125e-11	Q8CRH9	2	K	50S ribosomal protein L15	rplO
Cellular Component	GO:0000428	6	DNA-directed RNA polymerase complex	0.226043	Q8CQ83	367	K	DNA-directed RNA polymerase subunit beta'	rpoC
Cellular Component	GO:0000428	6	DNA-directed RNA polymerase complex	0.226043	Q8CQ83	161	K	DNA-directed RNA polymerase subunit beta'	rpoC
Cellular Component	GO:0000428	6	DNA-directed RNA polymerase complex	0.226043	Q8CQ83	789	K	DNA-directed RNA polymerase subunit beta'	rpoC
Cellular Component	GO:0000428	6	DNA-directed RNA polymerase complex	0.226043	Q8CQ83	71	K	DNA-directed RNA polymerase subunit beta'	rpoC
Cellular Component	GO:0000428	6	DNA-directed RNA polymerase complex	0.226043	Q8CQ83	56	K	DNA-directed RNA polymerase subunit beta'	rpoC
Cellular Component	GO:0000428	6	DNA-directed RNA polymerase complex	0.226043	Q8CQ83	648	K	DNA-directed RNA polymerase subunit beta'	rpoC
Cellular Component	GO:0000428	6	DNA-directed RNA polymerase complex	0.226043	Q8CQ83	30	K	DNA-directed RNA polymerase subunit beta'	rpoC
Cellular Component	GO:0000428	6	DNA-directed RNA polymerase complex	0.226043	Q8CQ83	1015	K	DNA-directed RNA polymerase subunit beta'	rpoC
Cellular Component	GO:0000428	6	DNA-directed RNA polymerase complex	0.226043	Q8CQ84	1166	K	DNA-directed RNA polymerase subunit beta	rpoB
Cellular Component	GO:0000428	6	DNA-directed RNA polymerase complex	0.226043	Q8CQ84	918	K	DNA-directed RNA polymerase subunit beta	rpoB
Cellular Component	GO:0000428	6	DNA-directed RNA polymerase complex	0.226043	Q8CQ84	676	K	DNA-directed RNA polymerase subunit beta	rpoB
Cellular Component	GO:0000428	6	DNA-directed RNA polymerase complex	0.226043	Q8CQ84	282	K	DNA-directed RNA polymerase subunit beta	rpoB
Cellular Component	GO:0000428	6	DNA-directed RNA polymerase complex	0.226043	Q8CQ84	606	K	DNA-directed RNA polymerase subunit beta	rpoB
Cellular Component	GO:0043232	4	intracellular non-membrane-bounded organelle	7.11765e-12	P66175	22	K	50S ribosomal protein L29	rpmC
Cellular Component	GO:0043232	4	intracellular non-membrane-bounded organelle	7.11765e-12	Q8CS87	99	K	50S ribosomal protein L21	rplU
Cellular Component	GO:0043232	4	intracellular non-membrane-bounded organelle	7.11765e-12	Q8CS87	70	K	50S ribosomal protein L21	rplU
Cellular Component	GO:0043232	4	intracellular non-membrane-bounded organelle	7.11765e-12	Q8CRG4	81	K	30S ribosomal protein S19	rpsS
Cellular Component	GO:0043232	4	intracellular non-membrane-bounded organelle	7.11765e-12	Q8CRG4	27	K	30S ribosomal protein S19	rpsS
Cellular Component	GO:0043232	4	intracellular non-membrane-bounded organelle	7.11765e-12	Q8CRG4	88	K	30S ribosomal protein S19	rpsS
Cellular Component	GO:0043232	4	intracellular non-membrane-bounded organelle	7.11765e-12	Q8CRG4	18	K	30S ribosomal protein S19	rpsS
Cellular Component	GO:0043232	4	intracellular non-membrane-bounded organelle	7.11765e-12	Q8CRG4	56	K	30S ribosomal protein S19	rpsS
Cellular Component	GO:0043232	4	intracellular non-membrane-bounded organelle	7.11765e-12	Q8CRG4	7	K	30S ribosomal protein S19	rpsS
Cellular Component	GO:0043232	4	intracellular non-membrane-bounded organelle	7.11765e-12	Q8CRG4	17	K	30S ribosomal protein S19	rpsS
Cellular Component	GO:0043232	4	intracellular non-membrane-bounded organelle	7.11765e-12	Q8CRH5	158	K	50S ribosomal protein L6	rplF
Cellular Component	GO:0043232	4	intracellular non-membrane-bounded organelle	7.11765e-12	Q8CRH5	59	K	50S ribosomal protein L6	rplF
Cellular Component	GO:0043232	4	intracellular non-membrane-bounded organelle	7.11765e-12	Q8CRH5	44	K	50S ribosomal protein L6	rplF
Cellular Component	GO:0043232	4	intracellular non-membrane-bounded organelle	7.11765e-12	Q8CST2	13	K	30S ribosomal protein S15	rpsO
Cellular Component	GO:0043232	4	intracellular non-membrane-bounded organelle	7.11765e-12	Q8CRG5	27	K	50S ribosomal protein L22	rplV
Cellular Component	GO:0043232	4	intracellular non-membrane-bounded organelle	7.11765e-12	Q8CRG5	98	K	50S ribosomal protein L22	rplV
Cellular Component	GO:0043232	4	intracellular non-membrane-bounded organelle	7.11765e-12	Q8CRG5	83	K	50S ribosomal protein L22	rplV
Cellular Component	GO:0043232	4	intracellular non-membrane-bounded organelle	7.11765e-12	Q8CRG5	111	K	50S ribosomal protein L22	rplV
Cellular Component	GO:0043232	4	intracellular non-membrane-bounded organelle	7.11765e-12	Q8CRG7	124	K	50S ribosomal protein L16	rplP
Cellular Component	GO:0043232	4	intracellular non-membrane-bounded organelle	7.11765e-12	Q8CRG7	98	K	50S ribosomal protein L16	rplP
Cellular Component	GO:0043232	4	intracellular non-membrane-bounded organelle	7.11765e-12	A0A0H2VGE6	365	K	DEAD-box ATP-dependent RNA helicase CshB	cshB
Cellular Component	GO:0043232	4	intracellular non-membrane-bounded organelle	7.11765e-12	A0A0H2VGE6	26	K	DEAD-box ATP-dependent RNA helicase CshB	cshB
Cellular Component	GO:0043232	4	intracellular non-membrane-bounded organelle	7.11765e-12	Q8CRG0	205	K	50S ribosomal protein L3	rplC
Cellular Component	GO:0043232	4	intracellular non-membrane-bounded organelle	7.11765e-12	Q8CRG0	67	K	50S ribosomal protein L3	rplC
Cellular Component	GO:0043232	4	intracellular non-membrane-bounded organelle	7.11765e-12	Q8CRG0	39	K	50S ribosomal protein L3	rplC
Cellular Component	GO:0043232	4	intracellular non-membrane-bounded organelle	7.11765e-12	Q8CRG0	71	K	50S ribosomal protein L3	rplC
Cellular Component	GO:0043232	4	intracellular non-membrane-bounded organelle	7.11765e-12	Q8CRG0	132	K	50S ribosomal protein L3	rplC
Cellular Component	GO:0043232	4	intracellular non-membrane-bounded organelle	7.11765e-12	Q8CRG0	125	K	50S ribosomal protein L3	rplC
Cellular Component	GO:0043232	4	intracellular non-membrane-bounded organelle	7.11765e-12	Q8CRG0	78	K	50S ribosomal protein L3	rplC
Cellular Component	GO:0043232	4	intracellular non-membrane-bounded organelle	7.11765e-12	Q8CRG0	79	K	50S ribosomal protein L3	rplC
Cellular Component	GO:0043232	4	intracellular non-membrane-bounded organelle	7.11765e-12	Q8CRJ0	7	K	30S ribosomal protein S9	rpsI
Cellular Component	GO:0043232	4	intracellular non-membrane-bounded organelle	7.11765e-12	Q8CS77	33	K	50S ribosomal protein L20	rplT
Cellular Component	GO:0043232	4	intracellular non-membrane-bounded organelle	7.11765e-12	Q8CS77	85	K	50S ribosomal protein L20	rplT
Cellular Component	GO:0043232	4	intracellular non-membrane-bounded organelle	7.11765e-12	Q8CS77	5	K	50S ribosomal protein L20	rplT
Cellular Component	GO:0043232	4	intracellular non-membrane-bounded organelle	7.11765e-12	Q8CRG8	18	K	30S ribosomal protein S17	rpsQ
Cellular Component	GO:0043232	4	intracellular non-membrane-bounded organelle	7.11765e-12	Q8CRG8	73	K	30S ribosomal protein S17	rpsQ
Cellular Component	GO:0043232	4	intracellular non-membrane-bounded organelle	7.11765e-12	Q8CRG8	47	K	30S ribosomal protein S17	rpsQ
Cellular Component	GO:0043232	4	intracellular non-membrane-bounded organelle	7.11765e-12	Q8CRP6	284	K	DEAD-box ATP-dependent RNA helicase CshA	cshA
Cellular Component	GO:0043232	4	intracellular non-membrane-bounded organelle	7.11765e-12	Q8CRH1	84	K	50S ribosomal protein L24	rplX
Cellular Component	GO:0043232	4	intracellular non-membrane-bounded organelle	7.11765e-12	Q8CRH1	42	K	50S ribosomal protein L24	rplX
Cellular Component	GO:0043232	4	intracellular non-membrane-bounded organelle	7.11765e-12	Q8CRH1	102	K	50S ribosomal protein L24	rplX
Cellular Component	GO:0043232	4	intracellular non-membrane-bounded organelle	7.11765e-12	Q8CRH1	96	K	50S ribosomal protein L24	rplX
Cellular Component	GO:0043232	4	intracellular non-membrane-bounded organelle	7.11765e-12	Q8CRH1	29	K	50S ribosomal protein L24	rplX
Cellular Component	GO:0043232	4	intracellular non-membrane-bounded organelle	7.11765e-12	Q8CRM8	63	K	50S ribosomal protein L31 type B	rpmE2
Cellular Component	GO:0043232	4	intracellular non-membrane-bounded organelle	7.11765e-12	Q8CRM8	2	K	50S ribosomal protein L31 type B	rpmE2
Cellular Component	GO:0043232	4	intracellular non-membrane-bounded organelle	7.11765e-12	P66255	10	K	50S ribosomal protein L34	rpmH
Cellular Component	GO:0043232	4	intracellular non-membrane-bounded organelle	7.11765e-12	Q8CRH8	21	K	50S ribosomal protein L30	rpmD
Cellular Component	GO:0043232	4	intracellular non-membrane-bounded organelle	7.11765e-12	Q8CRH8	30	K	50S ribosomal protein L30	rpmD
Cellular Component	GO:0043232	4	intracellular non-membrane-bounded organelle	7.11765e-12	Q8CRH8	51	K	50S ribosomal protein L30	rpmD
Cellular Component	GO:0043232	4	intracellular non-membrane-bounded organelle	7.11765e-12	Q8CRH8	29	K	50S ribosomal protein L30	rpmD
Cellular Component	GO:0043232	4	intracellular non-membrane-bounded organelle	7.11765e-12	Q8CSZ2	37	K	50S ribosomal protein L32	rpmF
Cellular Component	GO:0043232	4	intracellular non-membrane-bounded organelle	7.11765e-12	Q8CRI2	8	K	50S ribosomal protein L36	rpmJ
Cellular Component	GO:0043232	4	intracellular non-membrane-bounded organelle	7.11765e-12	Q8CSE3	41	K	50S ribosomal protein L33 1	rpmG1
Cellular Component	GO:0043232	4	intracellular non-membrane-bounded organelle	7.11765e-12	Q8CTF2	61	K	Ribosome hibernation promotion factor	hpf
Cellular Component	GO:0043232	4	intracellular non-membrane-bounded organelle	7.11765e-12	Q8CRG6	134	K	30S ribosomal protein S3	rpsC
Cellular Component	GO:0043232	4	intracellular non-membrane-bounded organelle	7.11765e-12	Q8CRG6	40	K	30S ribosomal protein S3	rpsC
Cellular Component	GO:0043232	4	intracellular non-membrane-bounded organelle	7.11765e-12	Q8CRG6	97	K	30S ribosomal protein S3	rpsC
Cellular Component	GO:0043232	4	intracellular non-membrane-bounded organelle	7.11765e-12	Q8CRG6	26	K	30S ribosomal protein S3	rpsC
Cellular Component	GO:0043232	4	intracellular non-membrane-bounded organelle	7.11765e-12	Q8CRG6	107	K	30S ribosomal protein S3	rpsC
Cellular Component	GO:0043232	4	intracellular non-membrane-bounded organelle	7.11765e-12	Q8CRG6	47	K	30S ribosomal protein S3	rpsC
Cellular Component	GO:0043232	4	intracellular non-membrane-bounded organelle	7.11765e-12	Q8CRG6	106	K	30S ribosomal protein S3	rpsC
Cellular Component	GO:0043232	4	intracellular non-membrane-bounded organelle	7.11765e-12	Q8CRG6	89	K	30S ribosomal protein S3	rpsC
Cellular Component	GO:0043232	4	intracellular non-membrane-bounded organelle	7.11765e-12	Q8CRG6	96	K	30S ribosomal protein S3	rpsC
Cellular Component	GO:0043232	4	intracellular non-membrane-bounded organelle	7.11765e-12	Q8CQU8	42	K	50S ribosomal protein L25	rplY
Cellular Component	GO:0043232	4	intracellular non-membrane-bounded organelle	7.11765e-12	Q8CRI3	64	K	30S ribosomal protein S13	rpsM
Cellular Component	GO:0043232	4	intracellular non-membrane-bounded organelle	7.11765e-12	Q8CRI3	46	K	30S ribosomal protein S13	rpsM
Cellular Component	GO:0043232	4	intracellular non-membrane-bounded organelle	7.11765e-12	Q8CRI3	78	K	30S ribosomal protein S13	rpsM
Cellular Component	GO:0043232	4	intracellular non-membrane-bounded organelle	7.11765e-12	P66523	8	K	30S ribosomal protein S21	rpsU
Cellular Component	GO:0043232	4	intracellular non-membrane-bounded organelle	7.11765e-12	P66523	40	K	30S ribosomal protein S21	rpsU
Cellular Component	GO:0043232	4	intracellular non-membrane-bounded organelle	7.11765e-12	P66336	11	K	30S ribosomal protein S10	rpsJ
Cellular Component	GO:0043232	4	intracellular non-membrane-bounded organelle	7.11765e-12	P66336	57	K	30S ribosomal protein S10	rpsJ
Cellular Component	GO:0043232	4	intracellular non-membrane-bounded organelle	7.11765e-12	P66336	30	K	30S ribosomal protein S10	rpsJ
Cellular Component	GO:0043232	4	intracellular non-membrane-bounded organelle	7.11765e-12	P66336	24	K	30S ribosomal protein S10	rpsJ
Cellular Component	GO:0043232	4	intracellular non-membrane-bounded organelle	7.11765e-12	Q8CRH7	159	K	30S ribosomal protein S5	rpsE
Cellular Component	GO:0043232	4	intracellular non-membrane-bounded organelle	7.11765e-12	Q8CRH7	69	K	30S ribosomal protein S5	rpsE
Cellular Component	GO:0043232	4	intracellular non-membrane-bounded organelle	7.11765e-12	Q8CRH7	97	K	30S ribosomal protein S5	rpsE
Cellular Component	GO:0043232	4	intracellular non-membrane-bounded organelle	7.11765e-12	Q8CRH7	61	K	30S ribosomal protein S5	rpsE
Cellular Component	GO:0043232	4	intracellular non-membrane-bounded organelle	7.11765e-12	Q8CRH7	9	K	30S ribosomal protein S5	rpsE
Cellular Component	GO:0043232	4	intracellular non-membrane-bounded organelle	7.11765e-12	Q8CRI5	52	K	50S ribosomal protein L17	rplQ
Cellular Component	GO:0043232	4	intracellular non-membrane-bounded organelle	7.11765e-12	Q8CRI5	53	K	50S ribosomal protein L17	rplQ
Cellular Component	GO:0043232	4	intracellular non-membrane-bounded organelle	7.11765e-12	Q8CRI5	64	K	50S ribosomal protein L17	rplQ
Cellular Component	GO:0043232	4	intracellular non-membrane-bounded organelle	7.11765e-12	Q8CRI5	46	K	50S ribosomal protein L17	rplQ
Cellular Component	GO:0043232	4	intracellular non-membrane-bounded organelle	7.11765e-12	Q8CRI5	105	K	50S ribosomal protein L17	rplQ
Cellular Component	GO:0043232	4	intracellular non-membrane-bounded organelle	7.11765e-12	Q8CSV0	88	K	30S ribosomal protein S16	rpsP
Cellular Component	GO:0043232	4	intracellular non-membrane-bounded organelle	7.11765e-12	Q8CSV0	66	K	30S ribosomal protein S16	rpsP
Cellular Component	GO:0043232	4	intracellular non-membrane-bounded organelle	7.11765e-12	Q8CSC6	70	K	30S ribosomal protein S20	rpsT
Cellular Component	GO:0043232	4	intracellular non-membrane-bounded organelle	7.11765e-12	Q8CSC6	46	K	30S ribosomal protein S20	rpsT
Cellular Component	GO:0043232	4	intracellular non-membrane-bounded organelle	7.11765e-12	Q8CSC6	55	K	30S ribosomal protein S20	rpsT
Cellular Component	GO:0043232	4	intracellular non-membrane-bounded organelle	7.11765e-12	Q8CRH2	119	K	50S ribosomal protein L5	rplE
Cellular Component	GO:0043232	4	intracellular non-membrane-bounded organelle	7.11765e-12	Q8CRH2	18	K	50S ribosomal protein L5	rplE
Cellular Component	GO:0043232	4	intracellular non-membrane-bounded organelle	7.11765e-12	Q8CRH2	72	K	50S ribosomal protein L5	rplE
Cellular Component	GO:0043232	4	intracellular non-membrane-bounded organelle	7.11765e-12	Q8CRH2	7	K	50S ribosomal protein L5	rplE
Cellular Component	GO:0043232	4	intracellular non-membrane-bounded organelle	7.11765e-12	Q8CRH2	19	K	50S ribosomal protein L5	rplE
Cellular Component	GO:0043232	4	intracellular non-membrane-bounded organelle	7.11765e-12	Q8CSP9	41	K	50S ribosomal protein L33 2	rpmG2
Cellular Component	GO:0043232	4	intracellular non-membrane-bounded organelle	7.11765e-12	Q8CS54	28	K	30S ribosomal protein S4	rpsD
Cellular Component	GO:0043232	4	intracellular non-membrane-bounded organelle	7.11765e-12	Q8CS54	134	K	30S ribosomal protein S4	rpsD
Cellular Component	GO:0043232	4	intracellular non-membrane-bounded organelle	7.11765e-12	Q8CS54	144	K	30S ribosomal protein S4	rpsD
Cellular Component	GO:0043232	4	intracellular non-membrane-bounded organelle	7.11765e-12	Q8CTT2	53	K	50S ribosomal protein L10	rplJ
Cellular Component	GO:0043232	4	intracellular non-membrane-bounded organelle	7.11765e-12	Q8CTT2	56	K	50S ribosomal protein L10	rplJ
Cellular Component	GO:0043232	4	intracellular non-membrane-bounded organelle	7.11765e-12	Q8CTT2	101	K	50S ribosomal protein L10	rplJ
Cellular Component	GO:0043232	4	intracellular non-membrane-bounded organelle	7.11765e-12	Q8CTT2	9	K	50S ribosomal protein L10	rplJ
Cellular Component	GO:0043232	4	intracellular non-membrane-bounded organelle	7.11765e-12	Q8CTT5	81	K	50S ribosomal protein L11	rplK
Cellular Component	GO:0043232	4	intracellular non-membrane-bounded organelle	7.11765e-12	Q8CTT5	80	K	50S ribosomal protein L11	rplK
Cellular Component	GO:0043232	4	intracellular non-membrane-bounded organelle	7.11765e-12	Q8CRG2	74	K	50S ribosomal protein L23	rplW
Cellular Component	GO:0043232	4	intracellular non-membrane-bounded organelle	7.11765e-12	Q8CRG2	59	K	50S ribosomal protein L23	rplW
Cellular Component	GO:0043232	4	intracellular non-membrane-bounded organelle	7.11765e-12	Q8CRG2	8	K	50S ribosomal protein L23	rplW
Cellular Component	GO:0043232	4	intracellular non-membrane-bounded organelle	7.11765e-12	Q8CRG2	83	K	50S ribosomal protein L23	rplW
Cellular Component	GO:0043232	4	intracellular non-membrane-bounded organelle	7.11765e-12	Q8CRG2	24	K	50S ribosomal protein L23	rplW
Cellular Component	GO:0043232	4	intracellular non-membrane-bounded organelle	7.11765e-12	P66618	35	K	30S ribosomal protein S7	rpsG
Cellular Component	GO:0043232	4	intracellular non-membrane-bounded organelle	7.11765e-12	P66618	25	K	30S ribosomal protein S7	rpsG
Cellular Component	GO:0043232	4	intracellular non-membrane-bounded organelle	7.11765e-12	Q8CSU2	81	K	30S ribosomal protein S2	rpsB
Cellular Component	GO:0043232	4	intracellular non-membrane-bounded organelle	7.11765e-12	Q8CSU2	74	K	30S ribosomal protein S2	rpsB
Cellular Component	GO:0043232	4	intracellular non-membrane-bounded organelle	7.11765e-12	Q8CSU2	49	K	30S ribosomal protein S2	rpsB
Cellular Component	GO:0043232	4	intracellular non-membrane-bounded organelle	7.11765e-12	Q8CSU2	138	K	30S ribosomal protein S2	rpsB
Cellular Component	GO:0043232	4	intracellular non-membrane-bounded organelle	7.11765e-12	Q8CSU2	132	K	30S ribosomal protein S2	rpsB
Cellular Component	GO:0043232	4	intracellular non-membrane-bounded organelle	7.11765e-12	Q8CSU2	73	K	30S ribosomal protein S2	rpsB
Cellular Component	GO:0043232	4	intracellular non-membrane-bounded organelle	7.11765e-12	Q8CSU2	29	K	30S ribosomal protein S2	rpsB
Cellular Component	GO:0043232	4	intracellular non-membrane-bounded organelle	7.11765e-12	Q8CRG9	53	K	50S ribosomal protein L14	rplN
Cellular Component	GO:0043232	4	intracellular non-membrane-bounded organelle	7.11765e-12	Q8CRG9	9	K	50S ribosomal protein L14	rplN
Cellular Component	GO:0043232	4	intracellular non-membrane-bounded organelle	7.11765e-12	Q8CRH4	33	K	30S ribosomal protein S8	rpsH
Cellular Component	GO:0043232	4	intracellular non-membrane-bounded organelle	7.11765e-12	Q8CRH4	90	K	30S ribosomal protein S8	rpsH
Cellular Component	GO:0043232	4	intracellular non-membrane-bounded organelle	7.11765e-12	Q8CRH4	78	K	30S ribosomal protein S8	rpsH
Cellular Component	GO:0043232	4	intracellular non-membrane-bounded organelle	7.11765e-12	Q8CRH4	41	K	30S ribosomal protein S8	rpsH
Cellular Component	GO:0043232	4	intracellular non-membrane-bounded organelle	7.11765e-12	Q8CRH4	34	K	30S ribosomal protein S8	rpsH
Cellular Component	GO:0043232	4	intracellular non-membrane-bounded organelle	7.11765e-12	Q8CRH4	56	K	30S ribosomal protein S8	rpsH
Cellular Component	GO:0043232	4	intracellular non-membrane-bounded organelle	7.11765e-12	Q8CRH4	24	K	30S ribosomal protein S8	rpsH
Cellular Component	GO:0043232	4	intracellular non-membrane-bounded organelle	7.11765e-12	Q8CRH4	65	K	30S ribosomal protein S8	rpsH
Cellular Component	GO:0043232	4	intracellular non-membrane-bounded organelle	7.11765e-12	Q8CRH4	82	K	30S ribosomal protein S8	rpsH
Cellular Component	GO:0043232	4	intracellular non-membrane-bounded organelle	7.11765e-12	Q8CSU9	85	K	50S ribosomal protein L19	rplS
Cellular Component	GO:0043232	4	intracellular non-membrane-bounded organelle	7.11765e-12	Q8CSU9	65	K	50S ribosomal protein L19	rplS
Cellular Component	GO:0043232	4	intracellular non-membrane-bounded organelle	7.11765e-12	Q8CRH6	38	K	50S ribosomal protein L18	rplR
Cellular Component	GO:0043232	4	intracellular non-membrane-bounded organelle	7.11765e-12	Q8CRH6	28	K	50S ribosomal protein L18	rplR
Cellular Component	GO:0043232	4	intracellular non-membrane-bounded organelle	7.11765e-12	Q8CRH6	21	K	50S ribosomal protein L18	rplR
Cellular Component	GO:0043232	4	intracellular non-membrane-bounded organelle	7.11765e-12	Q8CRH6	83	K	50S ribosomal protein L18	rplR
Cellular Component	GO:0043232	4	intracellular non-membrane-bounded organelle	7.11765e-12	Q8CRH6	61	K	50S ribosomal protein L18	rplR
Cellular Component	GO:0043232	4	intracellular non-membrane-bounded organelle	7.11765e-12	Q8CRH6	107	K	50S ribosomal protein L18	rplR
Cellular Component	GO:0043232	4	intracellular non-membrane-bounded organelle	7.11765e-12	Q8CTS8	101	K	30S ribosomal protein S12	rpsL
Cellular Component	GO:0043232	4	intracellular non-membrane-bounded organelle	7.11765e-12	Q8CTS8	43	K	30S ribosomal protein S12	rpsL
Cellular Component	GO:0043232	4	intracellular non-membrane-bounded organelle	7.11765e-12	Q8CTS8	17	K	30S ribosomal protein S12	rpsL
Cellular Component	GO:0043232	4	intracellular non-membrane-bounded organelle	7.11765e-12	Q8CQP4	19	K	30S ribosomal protein S6	rpsF
Cellular Component	GO:0043232	4	intracellular non-membrane-bounded organelle	7.11765e-12	Q8CQP6	35	K	30S ribosomal protein S18	rpsR
Cellular Component	GO:0043232	4	intracellular non-membrane-bounded organelle	7.11765e-12	Q8CQP6	77	K	30S ribosomal protein S18	rpsR
Cellular Component	GO:0043232	4	intracellular non-membrane-bounded organelle	7.11765e-12	Q8CQP6	65	K	30S ribosomal protein S18	rpsR
Cellular Component	GO:0043232	4	intracellular non-membrane-bounded organelle	7.11765e-12	Q8CQP6	55	K	30S ribosomal protein S18	rpsR
Cellular Component	GO:0043232	4	intracellular non-membrane-bounded organelle	7.11765e-12	Q8CS89	76	K	50S ribosomal protein L27	rpmA
Cellular Component	GO:0043232	4	intracellular non-membrane-bounded organelle	7.11765e-12	Q8CS76	65	K	50S ribosomal protein L35	rpmI
Cellular Component	GO:0043232	4	intracellular non-membrane-bounded organelle	7.11765e-12	Q8CRI9	69	K	50S ribosomal protein L13	rplM
Cellular Component	GO:0043232	4	intracellular non-membrane-bounded organelle	7.11765e-12	Q8CRI9	94	K	50S ribosomal protein L13	rplM
Cellular Component	GO:0043232	4	intracellular non-membrane-bounded organelle	7.11765e-12	Q8CRI9	122	K	50S ribosomal protein L13	rplM
Cellular Component	GO:0043232	4	intracellular non-membrane-bounded organelle	7.11765e-12	Q8CRI9	15	K	50S ribosomal protein L13	rplM
Cellular Component	GO:0043232	4	intracellular non-membrane-bounded organelle	7.11765e-12	Q8CRG1	52	K	50S ribosomal protein L4	rplD
Cellular Component	GO:0043232	4	intracellular non-membrane-bounded organelle	7.11765e-12	Q8CRG1	201	K	50S ribosomal protein L4	rplD
Cellular Component	GO:0043232	4	intracellular non-membrane-bounded organelle	7.11765e-12	Q8CRG1	140	K	50S ribosomal protein L4	rplD
Cellular Component	GO:0043232	4	intracellular non-membrane-bounded organelle	7.11765e-12	Q8CRG1	150	K	50S ribosomal protein L4	rplD
Cellular Component	GO:0043232	4	intracellular non-membrane-bounded organelle	7.11765e-12	Q8CRG3	252	K	50S ribosomal protein L2	rplB
Cellular Component	GO:0043232	4	intracellular non-membrane-bounded organelle	7.11765e-12	Q8CRG3	71	K	50S ribosomal protein L2	rplB
Cellular Component	GO:0043232	4	intracellular non-membrane-bounded organelle	7.11765e-12	Q8CRG3	7	K	50S ribosomal protein L2	rplB
Cellular Component	GO:0043232	4	intracellular non-membrane-bounded organelle	7.11765e-12	Q8CRG3	268	K	50S ribosomal protein L2	rplB
Cellular Component	GO:0043232	4	intracellular non-membrane-bounded organelle	7.11765e-12	Q8CRG3	31	K	50S ribosomal protein L2	rplB
Cellular Component	GO:0043232	4	intracellular non-membrane-bounded organelle	7.11765e-12	Q8CTT4	151	K	50S ribosomal protein L1	rplA
Cellular Component	GO:0043232	4	intracellular non-membrane-bounded organelle	7.11765e-12	Q8CTT4	7	K	50S ribosomal protein L1	rplA
Cellular Component	GO:0043232	4	intracellular non-membrane-bounded organelle	7.11765e-12	Q8CTT4	230	K	50S ribosomal protein L1	rplA
Cellular Component	GO:0043232	4	intracellular non-membrane-bounded organelle	7.11765e-12	Q8CTT4	160	K	50S ribosomal protein L1	rplA
Cellular Component	GO:0043232	4	intracellular non-membrane-bounded organelle	7.11765e-12	Q8CTT4	150	K	50S ribosomal protein L1	rplA
Cellular Component	GO:0043232	4	intracellular non-membrane-bounded organelle	7.11765e-12	Q8CTT4	54	K	50S ribosomal protein L1	rplA
Cellular Component	GO:0043232	4	intracellular non-membrane-bounded organelle	7.11765e-12	Q8CTT4	14	K	50S ribosomal protein L1	rplA
Cellular Component	GO:0043232	4	intracellular non-membrane-bounded organelle	7.11765e-12	A0A0H2VKZ1	267	K	Transcription terminator	SE_2378
Cellular Component	GO:0043232	4	intracellular non-membrane-bounded organelle	7.11765e-12	Q8CU90	109	K	50S ribosomal protein L9	rplI
Cellular Component	GO:0043232	4	intracellular non-membrane-bounded organelle	7.11765e-12	Q8CU90	69	K	50S ribosomal protein L9	rplI
Cellular Component	GO:0043232	4	intracellular non-membrane-bounded organelle	7.11765e-12	Q8CU90	52	K	50S ribosomal protein L9	rplI
Cellular Component	GO:0043232	4	intracellular non-membrane-bounded organelle	7.11765e-12	Q8CU90	103	K	50S ribosomal protein L9	rplI
Cellular Component	GO:0043232	4	intracellular non-membrane-bounded organelle	7.11765e-12	Q8CU90	34	K	50S ribosomal protein L9	rplI
Cellular Component	GO:0043232	4	intracellular non-membrane-bounded organelle	7.11765e-12	Q8CU90	73	K	50S ribosomal protein L9	rplI
Cellular Component	GO:0043232	4	intracellular non-membrane-bounded organelle	7.11765e-12	Q8CRH9	124	K	50S ribosomal protein L15	rplO
Cellular Component	GO:0043232	4	intracellular non-membrane-bounded organelle	7.11765e-12	Q8CRH9	119	K	50S ribosomal protein L15	rplO
Cellular Component	GO:0043232	4	intracellular non-membrane-bounded organelle	7.11765e-12	Q8CRH9	106	K	50S ribosomal protein L15	rplO
Cellular Component	GO:0043232	4	intracellular non-membrane-bounded organelle	7.11765e-12	Q8CRH9	7	K	50S ribosomal protein L15	rplO
Cellular Component	GO:0043232	4	intracellular non-membrane-bounded organelle	7.11765e-12	Q8CRH9	2	K	50S ribosomal protein L15	rplO
Cellular Component	GO:0022625	5	cytosolic large ribosomal subunit	1.63484e-11	P66175	22	K	50S ribosomal protein L29	rpmC
Cellular Component	GO:0022625	5	cytosolic large ribosomal subunit	1.63484e-11	Q8CS87	99	K	50S ribosomal protein L21	rplU
Cellular Component	GO:0022625	5	cytosolic large ribosomal subunit	1.63484e-11	Q8CS87	70	K	50S ribosomal protein L21	rplU
Cellular Component	GO:0022625	5	cytosolic large ribosomal subunit	1.63484e-11	Q8CRH5	158	K	50S ribosomal protein L6	rplF
Cellular Component	GO:0022625	5	cytosolic large ribosomal subunit	1.63484e-11	Q8CRH5	59	K	50S ribosomal protein L6	rplF
Cellular Component	GO:0022625	5	cytosolic large ribosomal subunit	1.63484e-11	Q8CRH5	44	K	50S ribosomal protein L6	rplF
Cellular Component	GO:0022625	5	cytosolic large ribosomal subunit	1.63484e-11	Q8CRG5	27	K	50S ribosomal protein L22	rplV
Cellular Component	GO:0022625	5	cytosolic large ribosomal subunit	1.63484e-11	Q8CRG5	98	K	50S ribosomal protein L22	rplV
Cellular Component	GO:0022625	5	cytosolic large ribosomal subunit	1.63484e-11	Q8CRG5	83	K	50S ribosomal protein L22	rplV
Cellular Component	GO:0022625	5	cytosolic large ribosomal subunit	1.63484e-11	Q8CRG5	111	K	50S ribosomal protein L22	rplV
Cellular Component	GO:0022625	5	cytosolic large ribosomal subunit	1.63484e-11	Q8CRG7	124	K	50S ribosomal protein L16	rplP
Cellular Component	GO:0022625	5	cytosolic large ribosomal subunit	1.63484e-11	Q8CRG7	98	K	50S ribosomal protein L16	rplP
Cellular Component	GO:0022625	5	cytosolic large ribosomal subunit	1.63484e-11	Q8CRG0	205	K	50S ribosomal protein L3	rplC
Cellular Component	GO:0022625	5	cytosolic large ribosomal subunit	1.63484e-11	Q8CRG0	67	K	50S ribosomal protein L3	rplC
Cellular Component	GO:0022625	5	cytosolic large ribosomal subunit	1.63484e-11	Q8CRG0	39	K	50S ribosomal protein L3	rplC
Cellular Component	GO:0022625	5	cytosolic large ribosomal subunit	1.63484e-11	Q8CRG0	71	K	50S ribosomal protein L3	rplC
Cellular Component	GO:0022625	5	cytosolic large ribosomal subunit	1.63484e-11	Q8CRG0	132	K	50S ribosomal protein L3	rplC
Cellular Component	GO:0022625	5	cytosolic large ribosomal subunit	1.63484e-11	Q8CRG0	125	K	50S ribosomal protein L3	rplC
Cellular Component	GO:0022625	5	cytosolic large ribosomal subunit	1.63484e-11	Q8CRG0	78	K	50S ribosomal protein L3	rplC
Cellular Component	GO:0022625	5	cytosolic large ribosomal subunit	1.63484e-11	Q8CRG0	79	K	50S ribosomal protein L3	rplC
Cellular Component	GO:0022625	5	cytosolic large ribosomal subunit	1.63484e-11	Q8CS77	33	K	50S ribosomal protein L20	rplT
Cellular Component	GO:0022625	5	cytosolic large ribosomal subunit	1.63484e-11	Q8CS77	85	K	50S ribosomal protein L20	rplT
Cellular Component	GO:0022625	5	cytosolic large ribosomal subunit	1.63484e-11	Q8CS77	5	K	50S ribosomal protein L20	rplT
Cellular Component	GO:0022625	5	cytosolic large ribosomal subunit	1.63484e-11	Q8CRH1	84	K	50S ribosomal protein L24	rplX
Cellular Component	GO:0022625	5	cytosolic large ribosomal subunit	1.63484e-11	Q8CRH1	42	K	50S ribosomal protein L24	rplX
Cellular Component	GO:0022625	5	cytosolic large ribosomal subunit	1.63484e-11	Q8CRH1	102	K	50S ribosomal protein L24	rplX
Cellular Component	GO:0022625	5	cytosolic large ribosomal subunit	1.63484e-11	Q8CRH1	96	K	50S ribosomal protein L24	rplX
Cellular Component	GO:0022625	5	cytosolic large ribosomal subunit	1.63484e-11	Q8CRH1	29	K	50S ribosomal protein L24	rplX
Cellular Component	GO:0022625	5	cytosolic large ribosomal subunit	1.63484e-11	Q8CRM8	63	K	50S ribosomal protein L31 type B	rpmE2
Cellular Component	GO:0022625	5	cytosolic large ribosomal subunit	1.63484e-11	Q8CRM8	2	K	50S ribosomal protein L31 type B	rpmE2
Cellular Component	GO:0022625	5	cytosolic large ribosomal subunit	1.63484e-11	P66255	10	K	50S ribosomal protein L34	rpmH
Cellular Component	GO:0022625	5	cytosolic large ribosomal subunit	1.63484e-11	Q8CRH8	21	K	50S ribosomal protein L30	rpmD
Cellular Component	GO:0022625	5	cytosolic large ribosomal subunit	1.63484e-11	Q8CRH8	30	K	50S ribosomal protein L30	rpmD
Cellular Component	GO:0022625	5	cytosolic large ribosomal subunit	1.63484e-11	Q8CRH8	51	K	50S ribosomal protein L30	rpmD
Cellular Component	GO:0022625	5	cytosolic large ribosomal subunit	1.63484e-11	Q8CRH8	29	K	50S ribosomal protein L30	rpmD
Cellular Component	GO:0022625	5	cytosolic large ribosomal subunit	1.63484e-11	Q8CSZ2	37	K	50S ribosomal protein L32	rpmF
Cellular Component	GO:0022625	5	cytosolic large ribosomal subunit	1.63484e-11	Q8CRI2	8	K	50S ribosomal protein L36	rpmJ
Cellular Component	GO:0022625	5	cytosolic large ribosomal subunit	1.63484e-11	Q8CSE3	41	K	50S ribosomal protein L33 1	rpmG1
Cellular Component	GO:0022625	5	cytosolic large ribosomal subunit	1.63484e-11	Q8CQU8	42	K	50S ribosomal protein L25	rplY
Cellular Component	GO:0022625	5	cytosolic large ribosomal subunit	1.63484e-11	Q8CRI5	52	K	50S ribosomal protein L17	rplQ
Cellular Component	GO:0022625	5	cytosolic large ribosomal subunit	1.63484e-11	Q8CRI5	53	K	50S ribosomal protein L17	rplQ
Cellular Component	GO:0022625	5	cytosolic large ribosomal subunit	1.63484e-11	Q8CRI5	64	K	50S ribosomal protein L17	rplQ
Cellular Component	GO:0022625	5	cytosolic large ribosomal subunit	1.63484e-11	Q8CRI5	46	K	50S ribosomal protein L17	rplQ
Cellular Component	GO:0022625	5	cytosolic large ribosomal subunit	1.63484e-11	Q8CRI5	105	K	50S ribosomal protein L17	rplQ
Cellular Component	GO:0022625	5	cytosolic large ribosomal subunit	1.63484e-11	Q8CRH2	119	K	50S ribosomal protein L5	rplE
Cellular Component	GO:0022625	5	cytosolic large ribosomal subunit	1.63484e-11	Q8CRH2	18	K	50S ribosomal protein L5	rplE
Cellular Component	GO:0022625	5	cytosolic large ribosomal subunit	1.63484e-11	Q8CRH2	72	K	50S ribosomal protein L5	rplE
Cellular Component	GO:0022625	5	cytosolic large ribosomal subunit	1.63484e-11	Q8CRH2	7	K	50S ribosomal protein L5	rplE
Cellular Component	GO:0022625	5	cytosolic large ribosomal subunit	1.63484e-11	Q8CRH2	19	K	50S ribosomal protein L5	rplE
Cellular Component	GO:0022625	5	cytosolic large ribosomal subunit	1.63484e-11	Q8CSP9	41	K	50S ribosomal protein L33 2	rpmG2
Cellular Component	GO:0022625	5	cytosolic large ribosomal subunit	1.63484e-11	Q8CTT2	53	K	50S ribosomal protein L10	rplJ
Cellular Component	GO:0022625	5	cytosolic large ribosomal subunit	1.63484e-11	Q8CTT2	56	K	50S ribosomal protein L10	rplJ
Cellular Component	GO:0022625	5	cytosolic large ribosomal subunit	1.63484e-11	Q8CTT2	101	K	50S ribosomal protein L10	rplJ
Cellular Component	GO:0022625	5	cytosolic large ribosomal subunit	1.63484e-11	Q8CTT2	9	K	50S ribosomal protein L10	rplJ
Cellular Component	GO:0022625	5	cytosolic large ribosomal subunit	1.63484e-11	Q8CTT5	81	K	50S ribosomal protein L11	rplK
Cellular Component	GO:0022625	5	cytosolic large ribosomal subunit	1.63484e-11	Q8CTT5	80	K	50S ribosomal protein L11	rplK
Cellular Component	GO:0022625	5	cytosolic large ribosomal subunit	1.63484e-11	Q8CRG2	74	K	50S ribosomal protein L23	rplW
Cellular Component	GO:0022625	5	cytosolic large ribosomal subunit	1.63484e-11	Q8CRG2	59	K	50S ribosomal protein L23	rplW
Cellular Component	GO:0022625	5	cytosolic large ribosomal subunit	1.63484e-11	Q8CRG2	8	K	50S ribosomal protein L23	rplW
Cellular Component	GO:0022625	5	cytosolic large ribosomal subunit	1.63484e-11	Q8CRG2	83	K	50S ribosomal protein L23	rplW
Cellular Component	GO:0022625	5	cytosolic large ribosomal subunit	1.63484e-11	Q8CRG2	24	K	50S ribosomal protein L23	rplW
Cellular Component	GO:0022625	5	cytosolic large ribosomal subunit	1.63484e-11	Q8CRG9	53	K	50S ribosomal protein L14	rplN
Cellular Component	GO:0022625	5	cytosolic large ribosomal subunit	1.63484e-11	Q8CRG9	9	K	50S ribosomal protein L14	rplN
Cellular Component	GO:0022625	5	cytosolic large ribosomal subunit	1.63484e-11	Q8CSU9	85	K	50S ribosomal protein L19	rplS
Cellular Component	GO:0022625	5	cytosolic large ribosomal subunit	1.63484e-11	Q8CSU9	65	K	50S ribosomal protein L19	rplS
Cellular Component	GO:0022625	5	cytosolic large ribosomal subunit	1.63484e-11	Q8CRH6	38	K	50S ribosomal protein L18	rplR
Cellular Component	GO:0022625	5	cytosolic large ribosomal subunit	1.63484e-11	Q8CRH6	28	K	50S ribosomal protein L18	rplR
Cellular Component	GO:0022625	5	cytosolic large ribosomal subunit	1.63484e-11	Q8CRH6	21	K	50S ribosomal protein L18	rplR
Cellular Component	GO:0022625	5	cytosolic large ribosomal subunit	1.63484e-11	Q8CRH6	83	K	50S ribosomal protein L18	rplR
Cellular Component	GO:0022625	5	cytosolic large ribosomal subunit	1.63484e-11	Q8CRH6	61	K	50S ribosomal protein L18	rplR
Cellular Component	GO:0022625	5	cytosolic large ribosomal subunit	1.63484e-11	Q8CRH6	107	K	50S ribosomal protein L18	rplR
Cellular Component	GO:0022625	5	cytosolic large ribosomal subunit	1.63484e-11	Q8CS89	76	K	50S ribosomal protein L27	rpmA
Cellular Component	GO:0022625	5	cytosolic large ribosomal subunit	1.63484e-11	Q8CS76	65	K	50S ribosomal protein L35	rpmI
Cellular Component	GO:0022625	5	cytosolic large ribosomal subunit	1.63484e-11	Q8CRI9	69	K	50S ribosomal protein L13	rplM
Cellular Component	GO:0022625	5	cytosolic large ribosomal subunit	1.63484e-11	Q8CRI9	94	K	50S ribosomal protein L13	rplM
Cellular Component	GO:0022625	5	cytosolic large ribosomal subunit	1.63484e-11	Q8CRI9	122	K	50S ribosomal protein L13	rplM
Cellular Component	GO:0022625	5	cytosolic large ribosomal subunit	1.63484e-11	Q8CRI9	15	K	50S ribosomal protein L13	rplM
Cellular Component	GO:0022625	5	cytosolic large ribosomal subunit	1.63484e-11	Q8CRG1	52	K	50S ribosomal protein L4	rplD
Cellular Component	GO:0022625	5	cytosolic large ribosomal subunit	1.63484e-11	Q8CRG1	201	K	50S ribosomal protein L4	rplD
Cellular Component	GO:0022625	5	cytosolic large ribosomal subunit	1.63484e-11	Q8CRG1	140	K	50S ribosomal protein L4	rplD
Cellular Component	GO:0022625	5	cytosolic large ribosomal subunit	1.63484e-11	Q8CRG1	150	K	50S ribosomal protein L4	rplD
Cellular Component	GO:0022625	5	cytosolic large ribosomal subunit	1.63484e-11	Q8CRG3	252	K	50S ribosomal protein L2	rplB
Cellular Component	GO:0022625	5	cytosolic large ribosomal subunit	1.63484e-11	Q8CRG3	71	K	50S ribosomal protein L2	rplB
Cellular Component	GO:0022625	5	cytosolic large ribosomal subunit	1.63484e-11	Q8CRG3	7	K	50S ribosomal protein L2	rplB
Cellular Component	GO:0022625	5	cytosolic large ribosomal subunit	1.63484e-11	Q8CRG3	268	K	50S ribosomal protein L2	rplB
Cellular Component	GO:0022625	5	cytosolic large ribosomal subunit	1.63484e-11	Q8CRG3	31	K	50S ribosomal protein L2	rplB
Cellular Component	GO:0022625	5	cytosolic large ribosomal subunit	1.63484e-11	Q8CTT4	151	K	50S ribosomal protein L1	rplA
Cellular Component	GO:0022625	5	cytosolic large ribosomal subunit	1.63484e-11	Q8CTT4	7	K	50S ribosomal protein L1	rplA
Cellular Component	GO:0022625	5	cytosolic large ribosomal subunit	1.63484e-11	Q8CTT4	230	K	50S ribosomal protein L1	rplA
Cellular Component	GO:0022625	5	cytosolic large ribosomal subunit	1.63484e-11	Q8CTT4	160	K	50S ribosomal protein L1	rplA
Cellular Component	GO:0022625	5	cytosolic large ribosomal subunit	1.63484e-11	Q8CTT4	150	K	50S ribosomal protein L1	rplA
Cellular Component	GO:0022625	5	cytosolic large ribosomal subunit	1.63484e-11	Q8CTT4	54	K	50S ribosomal protein L1	rplA
Cellular Component	GO:0022625	5	cytosolic large ribosomal subunit	1.63484e-11	Q8CTT4	14	K	50S ribosomal protein L1	rplA
Cellular Component	GO:0022625	5	cytosolic large ribosomal subunit	1.63484e-11	Q8CU90	109	K	50S ribosomal protein L9	rplI
Cellular Component	GO:0022625	5	cytosolic large ribosomal subunit	1.63484e-11	Q8CU90	69	K	50S ribosomal protein L9	rplI
Cellular Component	GO:0022625	5	cytosolic large ribosomal subunit	1.63484e-11	Q8CU90	52	K	50S ribosomal protein L9	rplI
Cellular Component	GO:0022625	5	cytosolic large ribosomal subunit	1.63484e-11	Q8CU90	103	K	50S ribosomal protein L9	rplI
Cellular Component	GO:0022625	5	cytosolic large ribosomal subunit	1.63484e-11	Q8CU90	34	K	50S ribosomal protein L9	rplI
Cellular Component	GO:0022625	5	cytosolic large ribosomal subunit	1.63484e-11	Q8CU90	73	K	50S ribosomal protein L9	rplI
Cellular Component	GO:0022625	5	cytosolic large ribosomal subunit	1.63484e-11	Q8CRH9	124	K	50S ribosomal protein L15	rplO
Cellular Component	GO:0022625	5	cytosolic large ribosomal subunit	1.63484e-11	Q8CRH9	119	K	50S ribosomal protein L15	rplO
Cellular Component	GO:0022625	5	cytosolic large ribosomal subunit	1.63484e-11	Q8CRH9	106	K	50S ribosomal protein L15	rplO
Cellular Component	GO:0022625	5	cytosolic large ribosomal subunit	1.63484e-11	Q8CRH9	7	K	50S ribosomal protein L15	rplO
Cellular Component	GO:0022625	5	cytosolic large ribosomal subunit	1.63484e-11	Q8CRH9	2	K	50S ribosomal protein L15	rplO
Cellular Component	GO:0032153	2	cell division site	0.107139	A0A0H2VFT7	575	K	Penicillin-binding protein 1	SE_0856
Cellular Component	GO:0032153	2	cell division site	0.107139	Q8CPK5	72	K	Cell division protein FtsA	ftsA
Cellular Component	GO:0032153	2	cell division site	0.107139	Q8CPK5	57	K	Cell division protein FtsA	ftsA
Cellular Component	GO:0032153	2	cell division site	0.107139	Q8CPK5	411	K	Cell division protein FtsA	ftsA
Cellular Component	GO:0032153	2	cell division site	0.107139	Q8CPK5	115	K	Cell division protein FtsA	ftsA
Cellular Component	GO:0032153	2	cell division site	0.107139	Q8CPK5	460	K	Cell division protein FtsA	ftsA
Cellular Component	GO:0032153	2	cell division site	0.107139	Q8CPK5	135	K	Cell division protein FtsA	ftsA
Cellular Component	GO:0032153	2	cell division site	0.107139	Q8CPK4	373	K	Cell division protein FtsZ	ftsZ
Cellular Component	GO:0032153	2	cell division site	0.107139	Q8CPK4	79	K	Cell division protein FtsZ	ftsZ
Cellular Component	GO:0043226	2	organelle	3.21361e-10	P66175	22	K	50S ribosomal protein L29	rpmC
Cellular Component	GO:0043226	2	organelle	3.21361e-10	Q8CS87	99	K	50S ribosomal protein L21	rplU
Cellular Component	GO:0043226	2	organelle	3.21361e-10	Q8CS87	70	K	50S ribosomal protein L21	rplU
Cellular Component	GO:0043226	2	organelle	3.21361e-10	Q8CRG4	81	K	30S ribosomal protein S19	rpsS
Cellular Component	GO:0043226	2	organelle	3.21361e-10	Q8CRG4	27	K	30S ribosomal protein S19	rpsS
Cellular Component	GO:0043226	2	organelle	3.21361e-10	Q8CRG4	88	K	30S ribosomal protein S19	rpsS
Cellular Component	GO:0043226	2	organelle	3.21361e-10	Q8CRG4	18	K	30S ribosomal protein S19	rpsS
Cellular Component	GO:0043226	2	organelle	3.21361e-10	Q8CRG4	56	K	30S ribosomal protein S19	rpsS
Cellular Component	GO:0043226	2	organelle	3.21361e-10	Q8CRG4	7	K	30S ribosomal protein S19	rpsS
Cellular Component	GO:0043226	2	organelle	3.21361e-10	Q8CRG4	17	K	30S ribosomal protein S19	rpsS
Cellular Component	GO:0043226	2	organelle	3.21361e-10	Q8CRH5	158	K	50S ribosomal protein L6	rplF
Cellular Component	GO:0043226	2	organelle	3.21361e-10	Q8CRH5	59	K	50S ribosomal protein L6	rplF
Cellular Component	GO:0043226	2	organelle	3.21361e-10	Q8CRH5	44	K	50S ribosomal protein L6	rplF
Cellular Component	GO:0043226	2	organelle	3.21361e-10	Q8CST2	13	K	30S ribosomal protein S15	rpsO
Cellular Component	GO:0043226	2	organelle	3.21361e-10	Q8CRG5	27	K	50S ribosomal protein L22	rplV
Cellular Component	GO:0043226	2	organelle	3.21361e-10	Q8CRG5	98	K	50S ribosomal protein L22	rplV
Cellular Component	GO:0043226	2	organelle	3.21361e-10	Q8CRG5	83	K	50S ribosomal protein L22	rplV
Cellular Component	GO:0043226	2	organelle	3.21361e-10	Q8CRG5	111	K	50S ribosomal protein L22	rplV
Cellular Component	GO:0043226	2	organelle	3.21361e-10	Q8CRG7	124	K	50S ribosomal protein L16	rplP
Cellular Component	GO:0043226	2	organelle	3.21361e-10	Q8CRG7	98	K	50S ribosomal protein L16	rplP
Cellular Component	GO:0043226	2	organelle	3.21361e-10	A0A0H2VGE6	365	K	DEAD-box ATP-dependent RNA helicase CshB	cshB
Cellular Component	GO:0043226	2	organelle	3.21361e-10	A0A0H2VGE6	26	K	DEAD-box ATP-dependent RNA helicase CshB	cshB
Cellular Component	GO:0043226	2	organelle	3.21361e-10	Q8CRG0	205	K	50S ribosomal protein L3	rplC
Cellular Component	GO:0043226	2	organelle	3.21361e-10	Q8CRG0	67	K	50S ribosomal protein L3	rplC
Cellular Component	GO:0043226	2	organelle	3.21361e-10	Q8CRG0	39	K	50S ribosomal protein L3	rplC
Cellular Component	GO:0043226	2	organelle	3.21361e-10	Q8CRG0	71	K	50S ribosomal protein L3	rplC
Cellular Component	GO:0043226	2	organelle	3.21361e-10	Q8CRG0	132	K	50S ribosomal protein L3	rplC
Cellular Component	GO:0043226	2	organelle	3.21361e-10	Q8CRG0	125	K	50S ribosomal protein L3	rplC
Cellular Component	GO:0043226	2	organelle	3.21361e-10	Q8CRG0	78	K	50S ribosomal protein L3	rplC
Cellular Component	GO:0043226	2	organelle	3.21361e-10	Q8CRG0	79	K	50S ribosomal protein L3	rplC
Cellular Component	GO:0043226	2	organelle	3.21361e-10	Q8CRJ0	7	K	30S ribosomal protein S9	rpsI
Cellular Component	GO:0043226	2	organelle	3.21361e-10	Q8CS77	33	K	50S ribosomal protein L20	rplT
Cellular Component	GO:0043226	2	organelle	3.21361e-10	Q8CS77	85	K	50S ribosomal protein L20	rplT
Cellular Component	GO:0043226	2	organelle	3.21361e-10	Q8CS77	5	K	50S ribosomal protein L20	rplT
Cellular Component	GO:0043226	2	organelle	3.21361e-10	Q8CRG8	18	K	30S ribosomal protein S17	rpsQ
Cellular Component	GO:0043226	2	organelle	3.21361e-10	Q8CRG8	73	K	30S ribosomal protein S17	rpsQ
Cellular Component	GO:0043226	2	organelle	3.21361e-10	Q8CRG8	47	K	30S ribosomal protein S17	rpsQ
Cellular Component	GO:0043226	2	organelle	3.21361e-10	Q8CRP6	284	K	DEAD-box ATP-dependent RNA helicase CshA	cshA
Cellular Component	GO:0043226	2	organelle	3.21361e-10	Q8CRH1	84	K	50S ribosomal protein L24	rplX
Cellular Component	GO:0043226	2	organelle	3.21361e-10	Q8CRH1	42	K	50S ribosomal protein L24	rplX
Cellular Component	GO:0043226	2	organelle	3.21361e-10	Q8CRH1	102	K	50S ribosomal protein L24	rplX
Cellular Component	GO:0043226	2	organelle	3.21361e-10	Q8CRH1	96	K	50S ribosomal protein L24	rplX
Cellular Component	GO:0043226	2	organelle	3.21361e-10	Q8CRH1	29	K	50S ribosomal protein L24	rplX
Cellular Component	GO:0043226	2	organelle	3.21361e-10	Q8CRM8	63	K	50S ribosomal protein L31 type B	rpmE2
Cellular Component	GO:0043226	2	organelle	3.21361e-10	Q8CRM8	2	K	50S ribosomal protein L31 type B	rpmE2
Cellular Component	GO:0043226	2	organelle	3.21361e-10	P66255	10	K	50S ribosomal protein L34	rpmH
Cellular Component	GO:0043226	2	organelle	3.21361e-10	Q8CRH8	21	K	50S ribosomal protein L30	rpmD
Cellular Component	GO:0043226	2	organelle	3.21361e-10	Q8CRH8	30	K	50S ribosomal protein L30	rpmD
Cellular Component	GO:0043226	2	organelle	3.21361e-10	Q8CRH8	51	K	50S ribosomal protein L30	rpmD
Cellular Component	GO:0043226	2	organelle	3.21361e-10	Q8CRH8	29	K	50S ribosomal protein L30	rpmD
Cellular Component	GO:0043226	2	organelle	3.21361e-10	Q8CSZ2	37	K	50S ribosomal protein L32	rpmF
Cellular Component	GO:0043226	2	organelle	3.21361e-10	Q8CRI2	8	K	50S ribosomal protein L36	rpmJ
Cellular Component	GO:0043226	2	organelle	3.21361e-10	Q8CSE3	41	K	50S ribosomal protein L33 1	rpmG1
Cellular Component	GO:0043226	2	organelle	3.21361e-10	Q8CTF2	61	K	Ribosome hibernation promotion factor	hpf
Cellular Component	GO:0043226	2	organelle	3.21361e-10	Q8CRG6	134	K	30S ribosomal protein S3	rpsC
Cellular Component	GO:0043226	2	organelle	3.21361e-10	Q8CRG6	40	K	30S ribosomal protein S3	rpsC
Cellular Component	GO:0043226	2	organelle	3.21361e-10	Q8CRG6	97	K	30S ribosomal protein S3	rpsC
Cellular Component	GO:0043226	2	organelle	3.21361e-10	Q8CRG6	26	K	30S ribosomal protein S3	rpsC
Cellular Component	GO:0043226	2	organelle	3.21361e-10	Q8CRG6	107	K	30S ribosomal protein S3	rpsC
Cellular Component	GO:0043226	2	organelle	3.21361e-10	Q8CRG6	47	K	30S ribosomal protein S3	rpsC
Cellular Component	GO:0043226	2	organelle	3.21361e-10	Q8CRG6	106	K	30S ribosomal protein S3	rpsC
Cellular Component	GO:0043226	2	organelle	3.21361e-10	Q8CRG6	89	K	30S ribosomal protein S3	rpsC
Cellular Component	GO:0043226	2	organelle	3.21361e-10	Q8CRG6	96	K	30S ribosomal protein S3	rpsC
Cellular Component	GO:0043226	2	organelle	3.21361e-10	Q8CQU8	42	K	50S ribosomal protein L25	rplY
Cellular Component	GO:0043226	2	organelle	3.21361e-10	Q8CRI3	64	K	30S ribosomal protein S13	rpsM
Cellular Component	GO:0043226	2	organelle	3.21361e-10	Q8CRI3	46	K	30S ribosomal protein S13	rpsM
Cellular Component	GO:0043226	2	organelle	3.21361e-10	Q8CRI3	78	K	30S ribosomal protein S13	rpsM
Cellular Component	GO:0043226	2	organelle	3.21361e-10	P66523	8	K	30S ribosomal protein S21	rpsU
Cellular Component	GO:0043226	2	organelle	3.21361e-10	P66523	40	K	30S ribosomal protein S21	rpsU
Cellular Component	GO:0043226	2	organelle	3.21361e-10	P66336	11	K	30S ribosomal protein S10	rpsJ
Cellular Component	GO:0043226	2	organelle	3.21361e-10	P66336	57	K	30S ribosomal protein S10	rpsJ
Cellular Component	GO:0043226	2	organelle	3.21361e-10	P66336	30	K	30S ribosomal protein S10	rpsJ
Cellular Component	GO:0043226	2	organelle	3.21361e-10	P66336	24	K	30S ribosomal protein S10	rpsJ
Cellular Component	GO:0043226	2	organelle	3.21361e-10	Q8CRH7	159	K	30S ribosomal protein S5	rpsE
Cellular Component	GO:0043226	2	organelle	3.21361e-10	Q8CRH7	69	K	30S ribosomal protein S5	rpsE
Cellular Component	GO:0043226	2	organelle	3.21361e-10	Q8CRH7	97	K	30S ribosomal protein S5	rpsE
Cellular Component	GO:0043226	2	organelle	3.21361e-10	Q8CRH7	61	K	30S ribosomal protein S5	rpsE
Cellular Component	GO:0043226	2	organelle	3.21361e-10	Q8CRH7	9	K	30S ribosomal protein S5	rpsE
Cellular Component	GO:0043226	2	organelle	3.21361e-10	A0A0H2VI31	161	K	Dihydrolipoyl dehydrogenase	SE_0794
Cellular Component	GO:0043226	2	organelle	3.21361e-10	A0A0H2VI31	34	K	Dihydrolipoyl dehydrogenase	SE_0794
Cellular Component	GO:0043226	2	organelle	3.21361e-10	A0A0H2VI31	379	K	Dihydrolipoyl dehydrogenase	SE_0794
Cellular Component	GO:0043226	2	organelle	3.21361e-10	A0A0H2VI31	376	K	Dihydrolipoyl dehydrogenase	SE_0794
Cellular Component	GO:0043226	2	organelle	3.21361e-10	A0A0H2VI31	230	K	Dihydrolipoyl dehydrogenase	SE_0794
Cellular Component	GO:0043226	2	organelle	3.21361e-10	A0A0H2VI31	224	K	Dihydrolipoyl dehydrogenase	SE_0794
Cellular Component	GO:0043226	2	organelle	3.21361e-10	A0A0H2VI31	111	K	Dihydrolipoyl dehydrogenase	SE_0794
Cellular Component	GO:0043226	2	organelle	3.21361e-10	Q8CRI5	52	K	50S ribosomal protein L17	rplQ
Cellular Component	GO:0043226	2	organelle	3.21361e-10	Q8CRI5	53	K	50S ribosomal protein L17	rplQ
Cellular Component	GO:0043226	2	organelle	3.21361e-10	Q8CRI5	64	K	50S ribosomal protein L17	rplQ
Cellular Component	GO:0043226	2	organelle	3.21361e-10	Q8CRI5	46	K	50S ribosomal protein L17	rplQ
Cellular Component	GO:0043226	2	organelle	3.21361e-10	Q8CRI5	105	K	50S ribosomal protein L17	rplQ
Cellular Component	GO:0043226	2	organelle	3.21361e-10	Q8CSV0	88	K	30S ribosomal protein S16	rpsP
Cellular Component	GO:0043226	2	organelle	3.21361e-10	Q8CSV0	66	K	30S ribosomal protein S16	rpsP
Cellular Component	GO:0043226	2	organelle	3.21361e-10	Q8CSC6	70	K	30S ribosomal protein S20	rpsT
Cellular Component	GO:0043226	2	organelle	3.21361e-10	Q8CSC6	46	K	30S ribosomal protein S20	rpsT
Cellular Component	GO:0043226	2	organelle	3.21361e-10	Q8CSC6	55	K	30S ribosomal protein S20	rpsT
Cellular Component	GO:0043226	2	organelle	3.21361e-10	Q8CRH2	119	K	50S ribosomal protein L5	rplE
Cellular Component	GO:0043226	2	organelle	3.21361e-10	Q8CRH2	18	K	50S ribosomal protein L5	rplE
Cellular Component	GO:0043226	2	organelle	3.21361e-10	Q8CRH2	72	K	50S ribosomal protein L5	rplE
Cellular Component	GO:0043226	2	organelle	3.21361e-10	Q8CRH2	7	K	50S ribosomal protein L5	rplE
Cellular Component	GO:0043226	2	organelle	3.21361e-10	Q8CRH2	19	K	50S ribosomal protein L5	rplE
Cellular Component	GO:0043226	2	organelle	3.21361e-10	Q8CSP9	41	K	50S ribosomal protein L33 2	rpmG2
Cellular Component	GO:0043226	2	organelle	3.21361e-10	Q8CS54	28	K	30S ribosomal protein S4	rpsD
Cellular Component	GO:0043226	2	organelle	3.21361e-10	Q8CS54	134	K	30S ribosomal protein S4	rpsD
Cellular Component	GO:0043226	2	organelle	3.21361e-10	Q8CS54	144	K	30S ribosomal protein S4	rpsD
Cellular Component	GO:0043226	2	organelle	3.21361e-10	Q8CTT2	53	K	50S ribosomal protein L10	rplJ
Cellular Component	GO:0043226	2	organelle	3.21361e-10	Q8CTT2	56	K	50S ribosomal protein L10	rplJ
Cellular Component	GO:0043226	2	organelle	3.21361e-10	Q8CTT2	101	K	50S ribosomal protein L10	rplJ
Cellular Component	GO:0043226	2	organelle	3.21361e-10	Q8CTT2	9	K	50S ribosomal protein L10	rplJ
Cellular Component	GO:0043226	2	organelle	3.21361e-10	Q8CTT5	81	K	50S ribosomal protein L11	rplK
Cellular Component	GO:0043226	2	organelle	3.21361e-10	Q8CTT5	80	K	50S ribosomal protein L11	rplK
Cellular Component	GO:0043226	2	organelle	3.21361e-10	Q8CRG2	74	K	50S ribosomal protein L23	rplW
Cellular Component	GO:0043226	2	organelle	3.21361e-10	Q8CRG2	59	K	50S ribosomal protein L23	rplW
Cellular Component	GO:0043226	2	organelle	3.21361e-10	Q8CRG2	8	K	50S ribosomal protein L23	rplW
Cellular Component	GO:0043226	2	organelle	3.21361e-10	Q8CRG2	83	K	50S ribosomal protein L23	rplW
Cellular Component	GO:0043226	2	organelle	3.21361e-10	Q8CRG2	24	K	50S ribosomal protein L23	rplW
Cellular Component	GO:0043226	2	organelle	3.21361e-10	P66618	35	K	30S ribosomal protein S7	rpsG
Cellular Component	GO:0043226	2	organelle	3.21361e-10	P66618	25	K	30S ribosomal protein S7	rpsG
Cellular Component	GO:0043226	2	organelle	3.21361e-10	Q8CSU2	81	K	30S ribosomal protein S2	rpsB
Cellular Component	GO:0043226	2	organelle	3.21361e-10	Q8CSU2	74	K	30S ribosomal protein S2	rpsB
Cellular Component	GO:0043226	2	organelle	3.21361e-10	Q8CSU2	49	K	30S ribosomal protein S2	rpsB
Cellular Component	GO:0043226	2	organelle	3.21361e-10	Q8CSU2	138	K	30S ribosomal protein S2	rpsB
Cellular Component	GO:0043226	2	organelle	3.21361e-10	Q8CSU2	132	K	30S ribosomal protein S2	rpsB
Cellular Component	GO:0043226	2	organelle	3.21361e-10	Q8CSU2	73	K	30S ribosomal protein S2	rpsB
Cellular Component	GO:0043226	2	organelle	3.21361e-10	Q8CSU2	29	K	30S ribosomal protein S2	rpsB
Cellular Component	GO:0043226	2	organelle	3.21361e-10	Q8CRG9	53	K	50S ribosomal protein L14	rplN
Cellular Component	GO:0043226	2	organelle	3.21361e-10	Q8CRG9	9	K	50S ribosomal protein L14	rplN
Cellular Component	GO:0043226	2	organelle	3.21361e-10	Q8CRH4	33	K	30S ribosomal protein S8	rpsH
Cellular Component	GO:0043226	2	organelle	3.21361e-10	Q8CRH4	90	K	30S ribosomal protein S8	rpsH
Cellular Component	GO:0043226	2	organelle	3.21361e-10	Q8CRH4	78	K	30S ribosomal protein S8	rpsH
Cellular Component	GO:0043226	2	organelle	3.21361e-10	Q8CRH4	41	K	30S ribosomal protein S8	rpsH
Cellular Component	GO:0043226	2	organelle	3.21361e-10	Q8CRH4	34	K	30S ribosomal protein S8	rpsH
Cellular Component	GO:0043226	2	organelle	3.21361e-10	Q8CRH4	56	K	30S ribosomal protein S8	rpsH
Cellular Component	GO:0043226	2	organelle	3.21361e-10	Q8CRH4	24	K	30S ribosomal protein S8	rpsH
Cellular Component	GO:0043226	2	organelle	3.21361e-10	Q8CRH4	65	K	30S ribosomal protein S8	rpsH
Cellular Component	GO:0043226	2	organelle	3.21361e-10	Q8CRH4	82	K	30S ribosomal protein S8	rpsH
Cellular Component	GO:0043226	2	organelle	3.21361e-10	Q8CSU9	85	K	50S ribosomal protein L19	rplS
Cellular Component	GO:0043226	2	organelle	3.21361e-10	Q8CSU9	65	K	50S ribosomal protein L19	rplS
Cellular Component	GO:0043226	2	organelle	3.21361e-10	Q8CRH6	38	K	50S ribosomal protein L18	rplR
Cellular Component	GO:0043226	2	organelle	3.21361e-10	Q8CRH6	28	K	50S ribosomal protein L18	rplR
Cellular Component	GO:0043226	2	organelle	3.21361e-10	Q8CRH6	21	K	50S ribosomal protein L18	rplR
Cellular Component	GO:0043226	2	organelle	3.21361e-10	Q8CRH6	83	K	50S ribosomal protein L18	rplR
Cellular Component	GO:0043226	2	organelle	3.21361e-10	Q8CRH6	61	K	50S ribosomal protein L18	rplR
Cellular Component	GO:0043226	2	organelle	3.21361e-10	Q8CRH6	107	K	50S ribosomal protein L18	rplR
Cellular Component	GO:0043226	2	organelle	3.21361e-10	Q8CPH4	243	K	Succinate--CoA ligase [ADP-forming] subunit alpha	sucD
Cellular Component	GO:0043226	2	organelle	3.21361e-10	Q8CPH4	145	K	Succinate--CoA ligase [ADP-forming] subunit alpha	sucD
Cellular Component	GO:0043226	2	organelle	3.21361e-10	Q8CPH4	144	K	Succinate--CoA ligase [ADP-forming] subunit alpha	sucD
Cellular Component	GO:0043226	2	organelle	3.21361e-10	Q8CPH4	7	K	Succinate--CoA ligase [ADP-forming] subunit alpha	sucD
Cellular Component	GO:0043226	2	organelle	3.21361e-10	Q8CPH4	301	K	Succinate--CoA ligase [ADP-forming] subunit alpha	sucD
Cellular Component	GO:0043226	2	organelle	3.21361e-10	Q8CTS8	101	K	30S ribosomal protein S12	rpsL
Cellular Component	GO:0043226	2	organelle	3.21361e-10	Q8CTS8	43	K	30S ribosomal protein S12	rpsL
Cellular Component	GO:0043226	2	organelle	3.21361e-10	Q8CTS8	17	K	30S ribosomal protein S12	rpsL
Cellular Component	GO:0043226	2	organelle	3.21361e-10	Q8CQP4	19	K	30S ribosomal protein S6	rpsF
Cellular Component	GO:0043226	2	organelle	3.21361e-10	Q8CQP6	35	K	30S ribosomal protein S18	rpsR
Cellular Component	GO:0043226	2	organelle	3.21361e-10	Q8CQP6	77	K	30S ribosomal protein S18	rpsR
Cellular Component	GO:0043226	2	organelle	3.21361e-10	Q8CQP6	65	K	30S ribosomal protein S18	rpsR
Cellular Component	GO:0043226	2	organelle	3.21361e-10	Q8CQP6	55	K	30S ribosomal protein S18	rpsR
Cellular Component	GO:0043226	2	organelle	3.21361e-10	Q8CS89	76	K	50S ribosomal protein L27	rpmA
Cellular Component	GO:0043226	2	organelle	3.21361e-10	Q8CS76	65	K	50S ribosomal protein L35	rpmI
Cellular Component	GO:0043226	2	organelle	3.21361e-10	Q8CRI9	69	K	50S ribosomal protein L13	rplM
Cellular Component	GO:0043226	2	organelle	3.21361e-10	Q8CRI9	94	K	50S ribosomal protein L13	rplM
Cellular Component	GO:0043226	2	organelle	3.21361e-10	Q8CRI9	122	K	50S ribosomal protein L13	rplM
Cellular Component	GO:0043226	2	organelle	3.21361e-10	Q8CRI9	15	K	50S ribosomal protein L13	rplM
Cellular Component	GO:0043226	2	organelle	3.21361e-10	Q8CRG1	52	K	50S ribosomal protein L4	rplD
Cellular Component	GO:0043226	2	organelle	3.21361e-10	Q8CRG1	201	K	50S ribosomal protein L4	rplD
Cellular Component	GO:0043226	2	organelle	3.21361e-10	Q8CRG1	140	K	50S ribosomal protein L4	rplD
Cellular Component	GO:0043226	2	organelle	3.21361e-10	Q8CRG1	150	K	50S ribosomal protein L4	rplD
Cellular Component	GO:0043226	2	organelle	3.21361e-10	Q8CRG3	252	K	50S ribosomal protein L2	rplB
Cellular Component	GO:0043226	2	organelle	3.21361e-10	Q8CRG3	71	K	50S ribosomal protein L2	rplB
Cellular Component	GO:0043226	2	organelle	3.21361e-10	Q8CRG3	7	K	50S ribosomal protein L2	rplB
Cellular Component	GO:0043226	2	organelle	3.21361e-10	Q8CRG3	268	K	50S ribosomal protein L2	rplB
Cellular Component	GO:0043226	2	organelle	3.21361e-10	Q8CRG3	31	K	50S ribosomal protein L2	rplB
Cellular Component	GO:0043226	2	organelle	3.21361e-10	Q8CTT4	151	K	50S ribosomal protein L1	rplA
Cellular Component	GO:0043226	2	organelle	3.21361e-10	Q8CTT4	7	K	50S ribosomal protein L1	rplA
Cellular Component	GO:0043226	2	organelle	3.21361e-10	Q8CTT4	230	K	50S ribosomal protein L1	rplA
Cellular Component	GO:0043226	2	organelle	3.21361e-10	Q8CTT4	160	K	50S ribosomal protein L1	rplA
Cellular Component	GO:0043226	2	organelle	3.21361e-10	Q8CTT4	150	K	50S ribosomal protein L1	rplA
Cellular Component	GO:0043226	2	organelle	3.21361e-10	Q8CTT4	54	K	50S ribosomal protein L1	rplA
Cellular Component	GO:0043226	2	organelle	3.21361e-10	Q8CTT4	14	K	50S ribosomal protein L1	rplA
Cellular Component	GO:0043226	2	organelle	3.21361e-10	A0A0H2VKZ1	267	K	Transcription terminator	SE_2378
Cellular Component	GO:0043226	2	organelle	3.21361e-10	Q8CU90	109	K	50S ribosomal protein L9	rplI
Cellular Component	GO:0043226	2	organelle	3.21361e-10	Q8CU90	69	K	50S ribosomal protein L9	rplI
Cellular Component	GO:0043226	2	organelle	3.21361e-10	Q8CU90	52	K	50S ribosomal protein L9	rplI
Cellular Component	GO:0043226	2	organelle	3.21361e-10	Q8CU90	103	K	50S ribosomal protein L9	rplI
Cellular Component	GO:0043226	2	organelle	3.21361e-10	Q8CU90	34	K	50S ribosomal protein L9	rplI
Cellular Component	GO:0043226	2	organelle	3.21361e-10	Q8CU90	73	K	50S ribosomal protein L9	rplI
Cellular Component	GO:0043226	2	organelle	3.21361e-10	Q8CRH9	124	K	50S ribosomal protein L15	rplO
Cellular Component	GO:0043226	2	organelle	3.21361e-10	Q8CRH9	119	K	50S ribosomal protein L15	rplO
Cellular Component	GO:0043226	2	organelle	3.21361e-10	Q8CRH9	106	K	50S ribosomal protein L15	rplO
Cellular Component	GO:0043226	2	organelle	3.21361e-10	Q8CRH9	7	K	50S ribosomal protein L15	rplO
Cellular Component	GO:0043226	2	organelle	3.21361e-10	Q8CRH9	2	K	50S ribosomal protein L15	rplO
Cellular Component	GO:0042788	6	polysomal ribosome	0.226043	Q8CRG1	52	K	50S ribosomal protein L4	rplD
Cellular Component	GO:0042788	6	polysomal ribosome	0.226043	Q8CRG1	201	K	50S ribosomal protein L4	rplD
Cellular Component	GO:0042788	6	polysomal ribosome	0.226043	Q8CRG1	140	K	50S ribosomal protein L4	rplD
Cellular Component	GO:0042788	6	polysomal ribosome	0.226043	Q8CRG1	150	K	50S ribosomal protein L4	rplD
Cellular Component	GO:0042788	6	polysomal ribosome	0.226043	Q8CRG5	27	K	50S ribosomal protein L22	rplV
Cellular Component	GO:0042788	6	polysomal ribosome	0.226043	Q8CRG5	98	K	50S ribosomal protein L22	rplV
Cellular Component	GO:0042788	6	polysomal ribosome	0.226043	Q8CRG5	83	K	50S ribosomal protein L22	rplV
Cellular Component	GO:0042788	6	polysomal ribosome	0.226043	Q8CRG5	111	K	50S ribosomal protein L22	rplV
Cellular Component	GO:0009986	2	cell surface	0.0215755	Q8CTU1	12	K	Cysteine--tRNA ligase	cysS
Cellular Component	GO:0009986	2	cell surface	0.0215755	Q8CPY5	124	K	Glyceraldehyde-3-phosphate dehydrogenase 1	gapA1
Cellular Component	GO:0009986	2	cell surface	0.0215755	Q8CPY5	116	K	Glyceraldehyde-3-phosphate dehydrogenase 1	gapA1
Cellular Component	GO:0009986	2	cell surface	0.0215755	Q8CPY5	219	K	Glyceraldehyde-3-phosphate dehydrogenase 1	gapA1
Cellular Component	GO:0009986	2	cell surface	0.0215755	Q8CPY5	115	K	Glyceraldehyde-3-phosphate dehydrogenase 1	gapA1
Cellular Component	GO:0009986	2	cell surface	0.0215755	Q8CTD6	27	K	Phosphoglycerate kinase	pgk
Cellular Component	GO:0009986	2	cell surface	0.0215755	Q8CTD6	272	K	Phosphoglycerate kinase	pgk
Cellular Component	GO:0009986	2	cell surface	0.0215755	Q8CTD6	130	K	Phosphoglycerate kinase	pgk
Cellular Component	GO:0009986	2	cell surface	0.0215755	Q8CTD6	206	K	Phosphoglycerate kinase	pgk
Cellular Component	GO:0009986	2	cell surface	0.0215755	Q8CTD6	75	K	Phosphoglycerate kinase	pgk
Cellular Component	GO:0009986	2	cell surface	0.0215755	Q8CTD6	4	K	Phosphoglycerate kinase	pgk
Cellular Component	GO:0009986	2	cell surface	0.0215755	Q8CTD6	99	K	Phosphoglycerate kinase	pgk
Cellular Component	GO:0009986	2	cell surface	0.0215755	Q8CTD6	126	K	Phosphoglycerate kinase	pgk
Cellular Component	GO:0009986	2	cell surface	0.0215755	Q8CP17	274	K	Chaperone protein DnaK	dnaK
Cellular Component	GO:0009986	2	cell surface	0.0215755	Q8CP17	233	K	Chaperone protein DnaK	dnaK
Cellular Component	GO:0009986	2	cell surface	0.0215755	Q8CP17	497	K	Chaperone protein DnaK	dnaK
Cellular Component	GO:0009986	2	cell surface	0.0215755	Q8CP17	129	K	Chaperone protein DnaK	dnaK
Cellular Component	GO:0009986	2	cell surface	0.0215755	Q8CP17	68	K	Chaperone protein DnaK	dnaK
Cellular Component	GO:0009986	2	cell surface	0.0215755	Q8CP17	324	K	Chaperone protein DnaK	dnaK
Cellular Component	GO:0009986	2	cell surface	0.0215755	Q8CP17	532	K	Chaperone protein DnaK	dnaK
Cellular Component	GO:0009986	2	cell surface	0.0215755	Q8CP17	487	K	Chaperone protein DnaK	dnaK
Cellular Component	GO:0009986	2	cell surface	0.0215755	Q8CP17	329	K	Chaperone protein DnaK	dnaK
Cellular Component	GO:0009986	2	cell surface	0.0215755	Q8CP17	76	K	Chaperone protein DnaK	dnaK
Cellular Component	GO:0009986	2	cell surface	0.0215755	Q8CP17	157	K	Chaperone protein DnaK	dnaK
Cellular Component	GO:0009986	2	cell surface	0.0215755	Q8CP17	284	K	Chaperone protein DnaK	dnaK
Cellular Component	GO:0009986	2	cell surface	0.0215755	Q8CP17	54	K	Chaperone protein DnaK	dnaK
Cellular Component	GO:0009986	2	cell surface	0.0215755	Q8CPY3	406	K	Enolase	eno
Cellular Component	GO:0009986	2	cell surface	0.0215755	Q8CPY3	268	K	Enolase	eno
Cellular Component	GO:0009986	2	cell surface	0.0215755	Q8CTU3	438	K	Glutamate--tRNA ligase	gltX
Cellular Component	GO:0009986	2	cell surface	0.0215755	Q8CTU3	430	K	Glutamate--tRNA ligase	gltX
Cellular Component	GO:0009986	2	cell surface	0.0215755	Q8CTU3	358	K	Glutamate--tRNA ligase	gltX
Cellular Component	GO:0009986	2	cell surface	0.0215755	Q8CPG8	233	K	Elongation factor Ts	tsf
Cellular Component	GO:0009986	2	cell surface	0.0215755	Q8CPG8	225	K	Elongation factor Ts	tsf
Cellular Component	GO:0009986	2	cell surface	0.0215755	Q8CPG8	146	K	Elongation factor Ts	tsf
Cellular Component	GO:0009986	2	cell surface	0.0215755	Q8CPG8	288	K	Elongation factor Ts	tsf
Cellular Component	GO:0009986	2	cell surface	0.0215755	Q8CPG8	218	K	Elongation factor Ts	tsf
Cellular Component	GO:0009986	2	cell surface	0.0215755	Q8CPG8	14	K	Elongation factor Ts	tsf
Cellular Component	GO:0009986	2	cell surface	0.0215755	Q8CPG8	278	K	Elongation factor Ts	tsf
Cellular Component	GO:0009986	2	cell surface	0.0215755	Q8CPG8	24	K	Elongation factor Ts	tsf
Cellular Component	GO:0009986	2	cell surface	0.0215755	Q8CPG8	178	K	Elongation factor Ts	tsf
Cellular Component	GO:0009986	2	cell surface	0.0215755	Q8CPG8	23	K	Elongation factor Ts	tsf
[truncated: 9,128 more rows]

## Sheet: KEGG ident
KEGG pathway	Mapping	Background	All Mapping	All Background	Fold enrichment	Fisher's exact test p value	-log10(p value)	Related proteins
map03010 Ribosome	54	59	357	870	2.23	5.21077e-17	16.28	P66175 Q8CS87 Q8CRG4 Q8CRH5 Q8CST2 Q8CRG5 Q8CRG7 Q8CRG0 Q8CRJ0 A0A0H2VGA0 Q8CS77 Q8CRG8 Q8CRH1 Q8CRM8 P66255 Q8CRH8 Q8CSZ2 Q8CRI2 Q8CSE3 Q8CSV6 Q8CRG6 Q8CQU8 Q8CRI3 P66523 P66336 Q8CTT1 Q8CRH7 Q8CRI5 Q8CSV0 Q8CSC6 Q8CRH2 Q8CSP9 Q8CS54 Q8CTT2 Q8CTT5 Q8CRG2 P66618 Q8CSU2 Q8CRG9 Q8CRH4 Q8CSU9 Q8CRH6 A0A0H2VGI1 Q8CTS8 Q8CQP4 Q8CQP6 Q8CS89 Q8CS76 Q8CRI9 Q8CRG1 Q8CRG3 Q8CTT4 Q8CU90 Q8CRH9
map00010 Glycolysis / Gluconeogenesis	33	40	357	870	2.01	4.71075e-08	7.33	Q8CTD5 Q8CN27 A0A0H2VEG1 Q7CCJ4 Q8CTD6 Q8CS68 A0A0H2VEM3 A0A0H2VGU2 Q8CNI5 A0A0H2VFY4 Q8CT13 Q8CPY3 Q8CPN3 Q8CPY4 A0A0H2VI31 Q8CN38 A0A0H2VIL4 Q8CPY5 Q8CNI3 Q8CMY5 A0A0H2VJG4 A0A0H2VJ66 Q8CS69 A0A0H2VIT7 Q8CN61 Q8CT80 Q8CQ56 Q8CMZ0 Q8CN24 Q8CPN2 Q8CP79 Q8CS25 Q8CNY0
map00020 Citrate cycle (TCA cycle)	23	28	357	870	2	7.53606e-06	5.12	A0A0H2VI31 A0A0H2VG08 A0A0H2VEG1 Q8CMY4 A0A0H2VI57 Q8CQE8 Q8CN91 A0A0H2VFQ9 Q8CNR1 Q8CPC2 Q8CSL9 Q8CQ96 A0A0H2VEM3 Q8CPH4 A0A0H2VFY4 Q8CNX4 Q8CPH5 Q8CT13 A0A0H2VJ27 Q8CPN2 Q8CPN3 Q8CS25 Q8CP83
map00620 Pyruvate metabolism	32	45	357	870	1.73	2.7504e-05	4.56	A0A0H2VEG1 Q8CMY4 Q8CQE8 Q8CN91 A0A0H2VFQ9 Q8CS66 Q8CQ62 A0A0H2VEM3 A0A0H2VGC2 A0A0H2VGU2 Q8CNI5 A0A0H2VFY4 Q8CS67 Q8CT13 A0A0H2VI85 Q8CTX6 Q8CS60 Q8CPN3 A0A0H2VI31 A0A0H2VIL4 Q8CNR1 A0A0H2VG48 A0A0H2VIA5 A0A0H2VGL1 A0A0H2VJG4 Q8CS69 A0A0H2VI54 Q8CQ96 Q8CMZ0 Q8CN24 Q8CPN2 Q8CS25
map00970 Aminoacyl-tRNA biosynthesis	19	24	357	870	1.93	0.00013342	3.87	Q8CS48 Q8CTU1 Q8CTN9 Q8CS99 Q8CSW1 Q8CQV5 Q8CTU3 Q8CRU3 Q8CSY8 Q8CS83 Q8CS74 Q8CT69 Q8CSA7 Q8CRU4 Q8CSD5 Q8CSX1 Q8CNU8 Q8CQU3 Q8CU95
map00720 Carbon fixation pathways in prokaryotes	19	27	357	870	1.71	0.00169505	2.77	A0A0H2VG08 A0A0H2VIL4 Q8CPP4 A0A0H2VI57 A0A0H2VFQ9 Q8CNR1 Q8CS66 Q8CPC2 A0A0H2VGL1 Q8CQ62 A0A0H2VI54 A0A0H2VGC2 Q8CPH4 Q8CNX4 A0A0H2VFY4 Q8CPH5 Q8CS67 Q8CS60 Q8CNV9
map03018 RNA degradation	12	15	357	870	1.95	0.00231903	2.63	Q8CS68 A0A0H2VJL5 Q8CRP6 Q8CSS7 A0A0H2VGX0 Q8CR71 Q8CP17 Q8CPY3 Q8CST1 Q8CT16 Q8CST0 P0C0N7
map00640 Propanoate metabolism	17	25	357	870	1.66	0.00530325	2.28	A0A0H2VI31 A0A0H2VIL4 A0A0H2VEG1 A0A0H2VGD2 Q8CS66 A0A0H2VGL1 Q8CQ62 Q8CPH4 A0A0H2VGB8 A0A0H2VGC2 Q8CPH5 Q8CS67 Q8CTX6 A0A0H2VJK1 Q8CMZ0 A0A0H2VH40 Q8CS60
map00561 Glycerolipid metabolism	14	20	357	870	1.71	0.00781282	2.11	Q8CQ10 P59253 Q8CNI5 A0A0H2VH29 A0A0H2VHZ9 A0A0H2VEK5 Q8CPI5 A0A0H2VH40 A0A0H2VG69 Q8CN24 A0A0H2VJG4 Q8CSS0 Q8CRU5 P0C0R4
map00710 Carbon fixation in photosynthetic organisms	10	13	357	870	1.87	0.00917808	2.04	Q8CTD5 Q8CN27 Q8CPY5 Q8CNI3 Q8CTD6 Q8CMY5 Q8CS25 Q8CPC7 Q8CNY0 A0A0H2VI54
map00052 Galactose metabolism	11	15	357	870	1.79	0.011073	1.96	Q8CS68 Q8CNF5 A0A0H2VGB4 Q8CN38 Q8CNF6 Q8CRJ3 Q8CRJ2 Q8CR67 Q8CNF8 A0A0H2VIT7 Q8CNF7
map00680 Methane metabolism	12	17	357	870	1.72	0.0126182	1.9	Q8CS68 Q8CN61 A0A0H2VIL4 Q8CN27 Q8CNI3 Q8CQ69 Q8CMY5 Q8CPY3 Q8CS60 Q8CQ62 Q8CRN3 Q8CPY4
map00030 Pentose phosphate pathway	14	22	357	870	1.55	0.025693	1.59	Q8CS68 Q8CNH9 A0A0H2VJJ5 Q8CN38 Q8CT80 Q8CN27 Q8CP47 Q8CNI3 A0A0H2VIQ5 Q8CQ69 Q8CMY5 Q8CQU7 Q8CPC7 Q8CNH7
map00521 Streptomycin biosynthesis	4	4	357	870	2.44	0.0280719	1.55	A0A0H2VHP9 Q8CN38 A0A0H2VIT7 A0A0H2VHA1
map00500 Starch and sucrose metabolism	8	11	357	870	1.77	0.0335533	1.47	A0A0H2VGB4 Q8CN38 Q8CT80 Q8CR67 A0A0H2VHD4 Q8CP79 A0A0H2VJ33 A0A0H2VIT7

## Sheet: ident Pathway2Protein
KEGG pathway	Fisher's exact test p value	Mapping	Fold enrichment	Protein accession	Position	Amino acid	Protein names	Gene names
map00500 Starch and sucrose metabolism	0.0335533	8	1.77	A0A0H2VGB4	468	K	Alpha-amylase	SE_1191
map00500 Starch and sucrose metabolism	0.0335533	8	1.77	A0A0H2VGB4	302	K	Alpha-amylase	SE_1191
map00500 Starch and sucrose metabolism	0.0335533	8	1.77	A0A0H2VGB4	393	K	Alpha-amylase	SE_1191
map00500 Starch and sucrose metabolism	0.0335533	8	1.77	A0A0H2VGB4	206	K	Alpha-amylase	SE_1191
map00500 Starch and sucrose metabolism	0.0335533	8	1.77	A0A0H2VGB4	405	K	Alpha-amylase	SE_1191
map00500 Starch and sucrose metabolism	0.0335533	8	1.77	A0A0H2VGB4	220	K	Alpha-amylase	SE_1191
map00500 Starch and sucrose metabolism	0.0335533	8	1.77	A0A0H2VGB4	167	K	Alpha-amylase	SE_1191
map00500 Starch and sucrose metabolism	0.0335533	8	1.77	Q8CN38	413	K	Phosphoglucomutase	pgcA
map00500 Starch and sucrose metabolism	0.0335533	8	1.77	Q8CN38	44	K	Phosphoglucomutase	pgcA
map00500 Starch and sucrose metabolism	0.0335533	8	1.77	Q8CT80	163	K	Glucose-6-phosphate isomerase	pgi
map00500 Starch and sucrose metabolism	0.0335533	8	1.77	Q8CT80	67	K	Glucose-6-phosphate isomerase	pgi
map00500 Starch and sucrose metabolism	0.0335533	8	1.77	Q8CT80	330	K	Glucose-6-phosphate isomerase	pgi
map00500 Starch and sucrose metabolism	0.0335533	8	1.77	Q8CT80	289	K	Glucose-6-phosphate isomerase	pgi
map00500 Starch and sucrose metabolism	0.0335533	8	1.77	Q8CT80	24	K	Glucose-6-phosphate isomerase	pgi
map00500 Starch and sucrose metabolism	0.0335533	8	1.77	Q8CT80	17	K	Glucose-6-phosphate isomerase	pgi
map00500 Starch and sucrose metabolism	0.0335533	8	1.77	Q8CR67	191	K	UTP--glucose-1-phosphate uridylyltransferase	gtaB
map00500 Starch and sucrose metabolism	0.0335533	8	1.77	Q8CR67	83	K	UTP--glucose-1-phosphate uridylyltransferase	gtaB
map00500 Starch and sucrose metabolism	0.0335533	8	1.77	Q8CR67	284	K	UTP--glucose-1-phosphate uridylyltransferase	gtaB
map00500 Starch and sucrose metabolism	0.0335533	8	1.77	A0A0H2VHD4	24	K	Fructokinase	SE_1639
map00500 Starch and sucrose metabolism	0.0335533	8	1.77	Q8CP79	70	K	PTS system glucose-specific EIIA component	crr
map00500 Starch and sucrose metabolism	0.0335533	8	1.77	Q8CP79	14	K	PTS system glucose-specific EIIA component	crr
map00500 Starch and sucrose metabolism	0.0335533	8	1.77	A0A0H2VJ33	464	K	PTS system arbutin-like IIBC component	SE_1897
map00500 Starch and sucrose metabolism	0.0335533	8	1.77	A0A0H2VJ33	117	K	PTS system arbutin-like IIBC component	SE_1897
map00500 Starch and sucrose metabolism	0.0335533	8	1.77	A0A0H2VIT7	22	K	Glucokinase	SE_1233
map03020 RNA polymerase	0.335102	3	1.46	Q8CQ83	367	K	DNA-directed RNA polymerase subunit beta'	rpoC
map03020 RNA polymerase	0.335102	3	1.46	Q8CQ83	161	K	DNA-directed RNA polymerase subunit beta'	rpoC
map03020 RNA polymerase	0.335102	3	1.46	Q8CQ83	789	K	DNA-directed RNA polymerase subunit beta'	rpoC
map03020 RNA polymerase	0.335102	3	1.46	Q8CQ83	71	K	DNA-directed RNA polymerase subunit beta'	rpoC
map03020 RNA polymerase	0.335102	3	1.46	Q8CQ83	56	K	DNA-directed RNA polymerase subunit beta'	rpoC
map03020 RNA polymerase	0.335102	3	1.46	Q8CQ83	648	K	DNA-directed RNA polymerase subunit beta'	rpoC
map03020 RNA polymerase	0.335102	3	1.46	Q8CQ83	30	K	DNA-directed RNA polymerase subunit beta'	rpoC
map03020 RNA polymerase	0.335102	3	1.46	Q8CQ83	1015	K	DNA-directed RNA polymerase subunit beta'	rpoC
map03020 RNA polymerase	0.335102	3	1.46	Q8CQ84	1166	K	DNA-directed RNA polymerase subunit beta	rpoB
map03020 RNA polymerase	0.335102	3	1.46	Q8CQ84	918	K	DNA-directed RNA polymerase subunit beta	rpoB
map03020 RNA polymerase	0.335102	3	1.46	Q8CQ84	676	K	DNA-directed RNA polymerase subunit beta	rpoB
map03020 RNA polymerase	0.335102	3	1.46	Q8CQ84	282	K	DNA-directed RNA polymerase subunit beta	rpoB
map03020 RNA polymerase	0.335102	3	1.46	Q8CQ84	606	K	DNA-directed RNA polymerase subunit beta	rpoB
map03020 RNA polymerase	0.335102	3	1.46	Q8CRI4	137	K	DNA-directed RNA polymerase subunit alpha	rpoA
map03020 RNA polymerase	0.335102	3	1.46	Q8CRI4	6	K	DNA-directed RNA polymerase subunit alpha	rpoA
map03020 RNA polymerase	0.335102	3	1.46	Q8CRI4	294	K	DNA-directed RNA polymerase subunit alpha	rpoA
map03020 RNA polymerase	0.335102	3	1.46	Q8CRI4	302	K	DNA-directed RNA polymerase subunit alpha	rpoA
map03020 RNA polymerase	0.335102	3	1.46	Q8CRI4	267	K	DNA-directed RNA polymerase subunit alpha	rpoA
map03020 RNA polymerase	0.335102	3	1.46	Q8CRI4	300	K	DNA-directed RNA polymerase subunit alpha	rpoA
map03010 Ribosome	5.21077e-17	54	2.23	P66175	22	K	50S ribosomal protein L29	rpmC
map03010 Ribosome	5.21077e-17	54	2.23	Q8CS87	99	K	50S ribosomal protein L21	rplU
map03010 Ribosome	5.21077e-17	54	2.23	Q8CS87	70	K	50S ribosomal protein L21	rplU
map03010 Ribosome	5.21077e-17	54	2.23	Q8CRG4	81	K	30S ribosomal protein S19	rpsS
map03010 Ribosome	5.21077e-17	54	2.23	Q8CRG4	27	K	30S ribosomal protein S19	rpsS
map03010 Ribosome	5.21077e-17	54	2.23	Q8CRG4	88	K	30S ribosomal protein S19	rpsS
map03010 Ribosome	5.21077e-17	54	2.23	Q8CRG4	18	K	30S ribosomal protein S19	rpsS
map03010 Ribosome	5.21077e-17	54	2.23	Q8CRG4	56	K	30S ribosomal protein S19	rpsS
map03010 Ribosome	5.21077e-17	54	2.23	Q8CRG4	7	K	30S ribosomal protein S19	rpsS
map03010 Ribosome	5.21077e-17	54	2.23	Q8CRG4	17	K	30S ribosomal protein S19	rpsS
map03010 Ribosome	5.21077e-17	54	2.23	Q8CRH5	158	K	50S ribosomal protein L6	rplF
map03010 Ribosome	5.21077e-17	54	2.23	Q8CRH5	59	K	50S ribosomal protein L6	rplF
map03010 Ribosome	5.21077e-17	54	2.23	Q8CRH5	44	K	50S ribosomal protein L6	rplF
map03010 Ribosome	5.21077e-17	54	2.23	Q8CST2	13	K	30S ribosomal protein S15	rpsO
map03010 Ribosome	5.21077e-17	54	2.23	Q8CRG5	27	K	50S ribosomal protein L22	rplV
map03010 Ribosome	5.21077e-17	54	2.23	Q8CRG5	98	K	50S ribosomal protein L22	rplV
map03010 Ribosome	5.21077e-17	54	2.23	Q8CRG5	83	K	50S ribosomal protein L22	rplV
map03010 Ribosome	5.21077e-17	54	2.23	Q8CRG5	111	K	50S ribosomal protein L22	rplV
map03010 Ribosome	5.21077e-17	54	2.23	Q8CRG7	124	K	50S ribosomal protein L16	rplP
map03010 Ribosome	5.21077e-17	54	2.23	Q8CRG7	98	K	50S ribosomal protein L16	rplP
map03010 Ribosome	5.21077e-17	54	2.23	Q8CRG0	205	K	50S ribosomal protein L3	rplC
map03010 Ribosome	5.21077e-17	54	2.23	Q8CRG0	67	K	50S ribosomal protein L3	rplC
map03010 Ribosome	5.21077e-17	54	2.23	Q8CRG0	39	K	50S ribosomal protein L3	rplC
map03010 Ribosome	5.21077e-17	54	2.23	Q8CRG0	71	K	50S ribosomal protein L3	rplC
map03010 Ribosome	5.21077e-17	54	2.23	Q8CRG0	132	K	50S ribosomal protein L3	rplC
map03010 Ribosome	5.21077e-17	54	2.23	Q8CRG0	125	K	50S ribosomal protein L3	rplC
map03010 Ribosome	5.21077e-17	54	2.23	Q8CRG0	78	K	50S ribosomal protein L3	rplC
map03010 Ribosome	5.21077e-17	54	2.23	Q8CRG0	79	K	50S ribosomal protein L3	rplC
map03010 Ribosome	5.21077e-17	54	2.23	Q8CRJ0	7	K	30S ribosomal protein S9	rpsI
map03010 Ribosome	5.21077e-17	54	2.23	A0A0H2VGA0	49	K	30S ribosomal protein S1	SE_1164
map03010 Ribosome	5.21077e-17	54	2.23	Q8CS77	33	K	50S ribosomal protein L20	rplT
map03010 Ribosome	5.21077e-17	54	2.23	Q8CS77	85	K	50S ribosomal protein L20	rplT
map03010 Ribosome	5.21077e-17	54	2.23	Q8CS77	5	K	50S ribosomal protein L20	rplT
map03010 Ribosome	5.21077e-17	54	2.23	Q8CRG8	18	K	30S ribosomal protein S17	rpsQ
map03010 Ribosome	5.21077e-17	54	2.23	Q8CRG8	73	K	30S ribosomal protein S17	rpsQ
map03010 Ribosome	5.21077e-17	54	2.23	Q8CRG8	47	K	30S ribosomal protein S17	rpsQ
map03010 Ribosome	5.21077e-17	54	2.23	Q8CRH1	84	K	50S ribosomal protein L24	rplX
map03010 Ribosome	5.21077e-17	54	2.23	Q8CRH1	42	K	50S ribosomal protein L24	rplX
map03010 Ribosome	5.21077e-17	54	2.23	Q8CRH1	102	K	50S ribosomal protein L24	rplX
map03010 Ribosome	5.21077e-17	54	2.23	Q8CRH1	96	K	50S ribosomal protein L24	rplX
map03010 Ribosome	5.21077e-17	54	2.23	Q8CRH1	29	K	50S ribosomal protein L24	rplX
map03010 Ribosome	5.21077e-17	54	2.23	Q8CRM8	63	K	50S ribosomal protein L31 type B	rpmE2
map03010 Ribosome	5.21077e-17	54	2.23	Q8CRM8	2	K	50S ribosomal protein L31 type B	rpmE2
map03010 Ribosome	5.21077e-17	54	2.23	P66255	10	K	50S ribosomal protein L34	rpmH
map03010 Ribosome	5.21077e-17	54	2.23	Q8CRH8	21	K	50S ribosomal protein L30	rpmD
map03010 Ribosome	5.21077e-17	54	2.23	Q8CRH8	30	K	50S ribosomal protein L30	rpmD
map03010 Ribosome	5.21077e-17	54	2.23	Q8CRH8	51	K	50S ribosomal protein L30	rpmD
map03010 Ribosome	5.21077e-17	54	2.23	Q8CRH8	29	K	50S ribosomal protein L30	rpmD
map03010 Ribosome	5.21077e-17	54	2.23	Q8CSZ2	37	K	50S ribosomal protein L32	rpmF
map03010 Ribosome	5.21077e-17	54	2.23	Q8CRI2	8	K	50S ribosomal protein L36	rpmJ
map03010 Ribosome	5.21077e-17	54	2.23	Q8CSE3	41	K	50S ribosomal protein L33 1	rpmG1
map03010 Ribosome	5.21077e-17	54	2.23	Q8CSV6	46	K	50S ribosomal protein L28	rpmB
map03010 Ribosome	5.21077e-17	54	2.23	Q8CSV6	3	K	50S ribosomal protein L28	rpmB
map03010 Ribosome	5.21077e-17	54	2.23	Q8CSV6	43	K	50S ribosomal protein L28	rpmB
map03010 Ribosome	5.21077e-17	54	2.23	Q8CSV6	26	K	50S ribosomal protein L28	rpmB
map03010 Ribosome	5.21077e-17	54	2.23	Q8CRG6	134	K	30S ribosomal protein S3	rpsC
map03010 Ribosome	5.21077e-17	54	2.23	Q8CRG6	40	K	30S ribosomal protein S3	rpsC
map03010 Ribosome	5.21077e-17	54	2.23	Q8CRG6	97	K	30S ribosomal protein S3	rpsC
map03010 Ribosome	5.21077e-17	54	2.23	Q8CRG6	26	K	30S ribosomal protein S3	rpsC
map03010 Ribosome	5.21077e-17	54	2.23	Q8CRG6	107	K	30S ribosomal protein S3	rpsC
map03010 Ribosome	5.21077e-17	54	2.23	Q8CRG6	47	K	30S ribosomal protein S3	rpsC
map03010 Ribosome	5.21077e-17	54	2.23	Q8CRG6	106	K	30S ribosomal protein S3	rpsC
map03010 Ribosome	5.21077e-17	54	2.23	Q8CRG6	89	K	30S ribosomal protein S3	rpsC
map03010 Ribosome	5.21077e-17	54	2.23	Q8CRG6	96	K	30S ribosomal protein S3	rpsC
map03010 Ribosome	5.21077e-17	54	2.23	Q8CQU8	42	K	50S ribosomal protein L25	rplY
map03010 Ribosome	5.21077e-17	54	2.23	Q8CRI3	64	K	30S ribosomal protein S13	rpsM
map03010 Ribosome	5.21077e-17	54	2.23	Q8CRI3	46	K	30S ribosomal protein S13	rpsM
map03010 Ribosome	5.21077e-17	54	2.23	Q8CRI3	78	K	30S ribosomal protein S13	rpsM
map03010 Ribosome	5.21077e-17	54	2.23	P66523	8	K	30S ribosomal protein S21	rpsU
map03010 Ribosome	5.21077e-17	54	2.23	P66523	40	K	30S ribosomal protein S21	rpsU
map03010 Ribosome	5.21077e-17	54	2.23	P66336	11	K	30S ribosomal protein S10	rpsJ
map03010 Ribosome	5.21077e-17	54	2.23	P66336	57	K	30S ribosomal protein S10	rpsJ
map03010 Ribosome	5.21077e-17	54	2.23	P66336	30	K	30S ribosomal protein S10	rpsJ
map03010 Ribosome	5.21077e-17	54	2.23	P66336	24	K	30S ribosomal protein S10	rpsJ
map03010 Ribosome	5.21077e-17	54	2.23	Q8CTT1	109	K	50S ribosomal protein L7/L12	rplL
map03010 Ribosome	5.21077e-17	54	2.23	Q8CTT1	72	K	50S ribosomal protein L7/L12	rplL
map03010 Ribosome	5.21077e-17	54	2.23	Q8CTT1	102	K	50S ribosomal protein L7/L12	rplL
map03010 Ribosome	5.21077e-17	54	2.23	Q8CTT1	97	K	50S ribosomal protein L7/L12	rplL
map03010 Ribosome	5.21077e-17	54	2.23	Q8CTT1	94	K	50S ribosomal protein L7/L12	rplL
map03010 Ribosome	5.21077e-17	54	2.23	Q8CRH7	159	K	30S ribosomal protein S5	rpsE
map03010 Ribosome	5.21077e-17	54	2.23	Q8CRH7	69	K	30S ribosomal protein S5	rpsE
map03010 Ribosome	5.21077e-17	54	2.23	Q8CRH7	97	K	30S ribosomal protein S5	rpsE
map03010 Ribosome	5.21077e-17	54	2.23	Q8CRH7	61	K	30S ribosomal protein S5	rpsE
map03010 Ribosome	5.21077e-17	54	2.23	Q8CRH7	9	K	30S ribosomal protein S5	rpsE
map03010 Ribosome	5.21077e-17	54	2.23	Q8CRI5	52	K	50S ribosomal protein L17	rplQ
map03010 Ribosome	5.21077e-17	54	2.23	Q8CRI5	53	K	50S ribosomal protein L17	rplQ
map03010 Ribosome	5.21077e-17	54	2.23	Q8CRI5	64	K	50S ribosomal protein L17	rplQ
map03010 Ribosome	5.21077e-17	54	2.23	Q8CRI5	46	K	50S ribosomal protein L17	rplQ
map03010 Ribosome	5.21077e-17	54	2.23	Q8CRI5	105	K	50S ribosomal protein L17	rplQ
map03010 Ribosome	5.21077e-17	54	2.23	Q8CSV0	88	K	30S ribosomal protein S16	rpsP
map03010 Ribosome	5.21077e-17	54	2.23	Q8CSV0	66	K	30S ribosomal protein S16	rpsP
map03010 Ribosome	5.21077e-17	54	2.23	Q8CSC6	70	K	30S ribosomal protein S20	rpsT
map03010 Ribosome	5.21077e-17	54	2.23	Q8CSC6	46	K	30S ribosomal protein S20	rpsT
map03010 Ribosome	5.21077e-17	54	2.23	Q8CSC6	55	K	30S ribosomal protein S20	rpsT
map03010 Ribosome	5.21077e-17	54	2.23	Q8CRH2	119	K	50S ribosomal protein L5	rplE
map03010 Ribosome	5.21077e-17	54	2.23	Q8CRH2	18	K	50S ribosomal protein L5	rplE
map03010 Ribosome	5.21077e-17	54	2.23	Q8CRH2	72	K	50S ribosomal protein L5	rplE
map03010 Ribosome	5.21077e-17	54	2.23	Q8CRH2	7	K	50S ribosomal protein L5	rplE
map03010 Ribosome	5.21077e-17	54	2.23	Q8CRH2	19	K	50S ribosomal protein L5	rplE
map03010 Ribosome	5.21077e-17	54	2.23	Q8CSP9	41	K	50S ribosomal protein L33 2	rpmG2
map03010 Ribosome	5.21077e-17	54	2.23	Q8CS54	28	K	30S ribosomal protein S4	rpsD
map03010 Ribosome	5.21077e-17	54	2.23	Q8CS54	134	K	30S ribosomal protein S4	rpsD
map03010 Ribosome	5.21077e-17	54	2.23	Q8CS54	144	K	30S ribosomal protein S4	rpsD
map03010 Ribosome	5.21077e-17	54	2.23	Q8CTT2	53	K	50S ribosomal protein L10	rplJ
map03010 Ribosome	5.21077e-17	54	2.23	Q8CTT2	56	K	50S ribosomal protein L10	rplJ
map03010 Ribosome	5.21077e-17	54	2.23	Q8CTT2	101	K	50S ribosomal protein L10	rplJ
map03010 Ribosome	5.21077e-17	54	2.23	Q8CTT2	9	K	50S ribosomal protein L10	rplJ
map03010 Ribosome	5.21077e-17	54	2.23	Q8CTT5	81	K	50S ribosomal protein L11	rplK
map03010 Ribosome	5.21077e-17	54	2.23	Q8CTT5	80	K	50S ribosomal protein L11	rplK
map03010 Ribosome	5.21077e-17	54	2.23	Q8CRG2	74	K	50S ribosomal protein L23	rplW
map03010 Ribosome	5.21077e-17	54	2.23	Q8CRG2	59	K	50S ribosomal protein L23	rplW
map03010 Ribosome	5.21077e-17	54	2.23	Q8CRG2	8	K	50S ribosomal protein L23	rplW
map03010 Ribosome	5.21077e-17	54	2.23	Q8CRG2	83	K	50S ribosomal protein L23	rplW
map03010 Ribosome	5.21077e-17	54	2.23	Q8CRG2	24	K	50S ribosomal protein L23	rplW
map03010 Ribosome	5.21077e-17	54	2.23	P66618	35	K	30S ribosomal protein S7	rpsG
map03010 Ribosome	5.21077e-17	54	2.23	P66618	25	K	30S ribosomal protein S7	rpsG
map03010 Ribosome	5.21077e-17	54	2.23	Q8CSU2	81	K	30S ribosomal protein S2	rpsB
map03010 Ribosome	5.21077e-17	54	2.23	Q8CSU2	74	K	30S ribosomal protein S2	rpsB
map03010 Ribosome	5.21077e-17	54	2.23	Q8CSU2	49	K	30S ribosomal protein S2	rpsB
map03010 Ribosome	5.21077e-17	54	2.23	Q8CSU2	138	K	30S ribosomal protein S2	rpsB
map03010 Ribosome	5.21077e-17	54	2.23	Q8CSU2	132	K	30S ribosomal protein S2	rpsB
map03010 Ribosome	5.21077e-17	54	2.23	Q8CSU2	73	K	30S ribosomal protein S2	rpsB
map03010 Ribosome	5.21077e-17	54	2.23	Q8CSU2	29	K	30S ribosomal protein S2	rpsB
map03010 Ribosome	5.21077e-17	54	2.23	Q8CRG9	53	K	50S ribosomal protein L14	rplN
map03010 Ribosome	5.21077e-17	54	2.23	Q8CRG9	9	K	50S ribosomal protein L14	rplN
map03010 Ribosome	5.21077e-17	54	2.23	Q8CRH4	33	K	30S ribosomal protein S8	rpsH
map03010 Ribosome	5.21077e-17	54	2.23	Q8CRH4	90	K	30S ribosomal protein S8	rpsH
map03010 Ribosome	5.21077e-17	54	2.23	Q8CRH4	78	K	30S ribosomal protein S8	rpsH
map03010 Ribosome	5.21077e-17	54	2.23	Q8CRH4	41	K	30S ribosomal protein S8	rpsH
map03010 Ribosome	5.21077e-17	54	2.23	Q8CRH4	34	K	30S ribosomal protein S8	rpsH
map03010 Ribosome	5.21077e-17	54	2.23	Q8CRH4	56	K	30S ribosomal protein S8	rpsH
map03010 Ribosome	5.21077e-17	54	2.23	Q8CRH4	24	K	30S ribosomal protein S8	rpsH
map03010 Ribosome	5.21077e-17	54	2.23	Q8CRH4	65	K	30S ribosomal protein S8	rpsH
map03010 Ribosome	5.21077e-17	54	2.23	Q8CRH4	82	K	30S ribosomal protein S8	rpsH
map03010 Ribosome	5.21077e-17	54	2.23	Q8CSU9	85	K	50S ribosomal protein L19	rplS
map03010 Ribosome	5.21077e-17	54	2.23	Q8CSU9	65	K	50S ribosomal protein L19	rplS
map03010 Ribosome	5.21077e-17	54	2.23	Q8CRH6	38	K	50S ribosomal protein L18	rplR
map03010 Ribosome	5.21077e-17	54	2.23	Q8CRH6	28	K	50S ribosomal protein L18	rplR
map03010 Ribosome	5.21077e-17	54	2.23	Q8CRH6	21	K	50S ribosomal protein L18	rplR
map03010 Ribosome	5.21077e-17	54	2.23	Q8CRH6	83	K	50S ribosomal protein L18	rplR
map03010 Ribosome	5.21077e-17	54	2.23	Q8CRH6	61	K	50S ribosomal protein L18	rplR
map03010 Ribosome	5.21077e-17	54	2.23	Q8CRH6	107	K	50S ribosomal protein L18	rplR
map03010 Ribosome	5.21077e-17	54	2.23	A0A0H2VGI1	173	K	30S ribosomal protein S1	SE_1165
map03010 Ribosome	5.21077e-17	54	2.23	A0A0H2VGI1	183	K	30S ribosomal protein S1	SE_1165
map03010 Ribosome	5.21077e-17	54	2.23	A0A0H2VGI1	157	K	30S ribosomal protein S1	SE_1165
map03010 Ribosome	5.21077e-17	54	2.23	Q8CTS8	101	K	30S ribosomal protein S12	rpsL
map03010 Ribosome	5.21077e-17	54	2.23	Q8CTS8	43	K	30S ribosomal protein S12	rpsL
map03010 Ribosome	5.21077e-17	54	2.23	Q8CTS8	17	K	30S ribosomal protein S12	rpsL
map03010 Ribosome	5.21077e-17	54	2.23	Q8CQP4	19	K	30S ribosomal protein S6	rpsF
map03010 Ribosome	5.21077e-17	54	2.23	Q8CQP6	35	K	30S ribosomal protein S18	rpsR
map03010 Ribosome	5.21077e-17	54	2.23	Q8CQP6	77	K	30S ribosomal protein S18	rpsR
map03010 Ribosome	5.21077e-17	54	2.23	Q8CQP6	65	K	30S ribosomal protein S18	rpsR
map03010 Ribosome	5.21077e-17	54	2.23	Q8CQP6	55	K	30S ribosomal protein S18	rpsR
map03010 Ribosome	5.21077e-17	54	2.23	Q8CS89	76	K	50S ribosomal protein L27	rpmA
map03010 Ribosome	5.21077e-17	54	2.23	Q8CS76	65	K	50S ribosomal protein L35	rpmI
map03010 Ribosome	5.21077e-17	54	2.23	Q8CRI9	69	K	50S ribosomal protein L13	rplM
map03010 Ribosome	5.21077e-17	54	2.23	Q8CRI9	94	K	50S ribosomal protein L13	rplM
map03010 Ribosome	5.21077e-17	54	2.23	Q8CRI9	122	K	50S ribosomal protein L13	rplM
map03010 Ribosome	5.21077e-17	54	2.23	Q8CRI9	15	K	50S ribosomal protein L13	rplM
map03010 Ribosome	5.21077e-17	54	2.23	Q8CRG1	52	K	50S ribosomal protein L4	rplD
map03010 Ribosome	5.21077e-17	54	2.23	Q8CRG1	201	K	50S ribosomal protein L4	rplD
map03010 Ribosome	5.21077e-17	54	2.23	Q8CRG1	140	K	50S ribosomal protein L4	rplD
map03010 Ribosome	5.21077e-17	54	2.23	Q8CRG1	150	K	50S ribosomal protein L4	rplD
map03010 Ribosome	5.21077e-17	54	2.23	Q8CRG3	252	K	50S ribosomal protein L2	rplB
map03010 Ribosome	5.21077e-17	54	2.23	Q8CRG3	71	K	50S ribosomal protein L2	rplB
map03010 Ribosome	5.21077e-17	54	2.23	Q8CRG3	7	K	50S ribosomal protein L2	rplB
map03010 Ribosome	5.21077e-17	54	2.23	Q8CRG3	268	K	50S ribosomal protein L2	rplB
map03010 Ribosome	5.21077e-17	54	2.23	Q8CRG3	31	K	50S ribosomal protein L2	rplB
map03010 Ribosome	5.21077e-17	54	2.23	Q8CTT4	151	K	50S ribosomal protein L1	rplA
map03010 Ribosome	5.21077e-17	54	2.23	Q8CTT4	7	K	50S ribosomal protein L1	rplA
map03010 Ribosome	5.21077e-17	54	2.23	Q8CTT4	230	K	50S ribosomal protein L1	rplA
map03010 Ribosome	5.21077e-17	54	2.23	Q8CTT4	160	K	50S ribosomal protein L1	rplA
map03010 Ribosome	5.21077e-17	54	2.23	Q8CTT4	150	K	50S ribosomal protein L1	rplA
map03010 Ribosome	5.21077e-17	54	2.23	Q8CTT4	54	K	50S ribosomal protein L1	rplA
map03010 Ribosome	5.21077e-17	54	2.23	Q8CTT4	14	K	50S ribosomal protein L1	rplA
map03010 Ribosome	5.21077e-17	54	2.23	Q8CU90	109	K	50S ribosomal protein L9	rplI
map03010 Ribosome	5.21077e-17	54	2.23	Q8CU90	69	K	50S ribosomal protein L9	rplI
map03010 Ribosome	5.21077e-17	54	2.23	Q8CU90	52	K	50S ribosomal protein L9	rplI
map03010 Ribosome	5.21077e-17	54	2.23	Q8CU90	103	K	50S ribosomal protein L9	rplI
map03010 Ribosome	5.21077e-17	54	2.23	Q8CU90	34	K	50S ribosomal protein L9	rplI
map03010 Ribosome	5.21077e-17	54	2.23	Q8CU90	73	K	50S ribosomal protein L9	rplI
map03010 Ribosome	5.21077e-17	54	2.23	Q8CRH9	124	K	50S ribosomal protein L15	rplO
map03010 Ribosome	5.21077e-17	54	2.23	Q8CRH9	119	K	50S ribosomal protein L15	rplO
map03010 Ribosome	5.21077e-17	54	2.23	Q8CRH9	106	K	50S ribosomal protein L15	rplO
map03010 Ribosome	5.21077e-17	54	2.23	Q8CRH9	7	K	50S ribosomal protein L15	rplO
map03010 Ribosome	5.21077e-17	54	2.23	Q8CRH9	2	K	50S ribosomal protein L15	rplO
map00051 Fructose and mannose metabolism	0.111128	7	1.55	A0A0H2VHM0	6	K	Mannnose-6 phospate isomelase pmi	SE_1743
map00051 Fructose and mannose metabolism	0.111128	7	1.55	Q8CS68	212	K	ATP-dependent 6-phosphofructokinase	pfkA
map00051 Fructose and mannose metabolism	0.111128	7	1.55	Q8CS68	77	K	ATP-dependent 6-phosphofructokinase	pfkA
map00051 Fructose and mannose metabolism	0.111128	7	1.55	Q8CTD5	217	K	Triosephosphate isomerase	tpiA
map00051 Fructose and mannose metabolism	0.111128	7	1.55	Q8CTD5	151	K	Triosephosphate isomerase	tpiA
map00051 Fructose and mannose metabolism	0.111128	7	1.55	Q8CTD5	150	K	Triosephosphate isomerase	tpiA
map00051 Fructose and mannose metabolism	0.111128	7	1.55	Q8CTD5	113	K	Triosephosphate isomerase	tpiA
map00051 Fructose and mannose metabolism	0.111128	7	1.55	Q8CMY5	104	K	Fructose-bisphosphate aldolase class 1	fda
map00051 Fructose and mannose metabolism	0.111128	7	1.55	Q8CMY5	251	K	Fructose-bisphosphate aldolase class 1	fda
map00051 Fructose and mannose metabolism	0.111128	7	1.55	Q8CMY5	190	K	Fructose-bisphosphate aldolase class 1	fda
map00051 Fructose and mannose metabolism	0.111128	7	1.55	Q8CMY5	185	K	Fructose-bisphosphate aldolase class 1	fda
map00051 Fructose and mannose metabolism	0.111128	7	1.55	Q8CMY5	3	K	Fructose-bisphosphate aldolase class 1	fda
map00051 Fructose and mannose metabolism	0.111128	7	1.55	Q8CMY5	138	K	Fructose-bisphosphate aldolase class 1	fda
map00051 Fructose and mannose metabolism	0.111128	7	1.55	Q8CMY5	295	K	Fructose-bisphosphate aldolase class 1	fda
map00051 Fructose and mannose metabolism	0.111128	7	1.55	Q8CMY5	8	K	Fructose-bisphosphate aldolase class 1	fda
map00051 Fructose and mannose metabolism	0.111128	7	1.55	Q8CMY5	101	K	Fructose-bisphosphate aldolase class 1	fda
map00051 Fructose and mannose metabolism	0.111128	7	1.55	Q8CMY5	117	K	Fructose-bisphosphate aldolase class 1	fda
map00051 Fructose and mannose metabolism	0.111128	7	1.55	Q8CMY5	223	K	Fructose-bisphosphate aldolase class 1	fda
map00051 Fructose and mannose metabolism	0.111128	7	1.55	A0A0H2VHD4	24	K	Fructokinase	SE_1639
map00051 Fructose and mannose metabolism	0.111128	7	1.55	Q8CN27	292	K	"Fructose-1,6-bisphosphatase class 3"	fbp
map00051 Fructose and mannose metabolism	0.111128	7	1.55	Q8CNI3	269	K	Fructose-bisphosphate aldolase	fba
map00051 Fructose and mannose metabolism	0.111128	7	1.55	Q8CNI3	252	K	Fructose-bisphosphate aldolase	fba
map00051 Fructose and mannose metabolism	0.111128	7	1.55	Q8CNI3	259	K	Fructose-bisphosphate aldolase	fba
map00051 Fructose and mannose metabolism	0.111128	7	1.55	Q8CNI3	185	K	Fructose-bisphosphate aldolase	fba
map00051 Fructose and mannose metabolism	0.111128	7	1.55	Q8CNI3	7	K	Fructose-bisphosphate aldolase	fba
map00790 Folate biosynthesis	0.992004	4	0.46	Q8CMT8	82	K	Dihydroneopterin aldolase	folB
map00790 Folate biosynthesis	0.992004	4	0.46	Q8CNE1	243	K	Molybdopterin molybdenumtransferase	moeA
map00790 Folate biosynthesis	0.992004	4	0.46	Q8CTH8	220	K	7-cyano-7-deazaguanine synthase	queC
map00790 Folate biosynthesis	0.992004	4	0.46	Q8CNE6	2	K	"GTP 3',8-cyclase"	moaA
map00450 Selenocompound metabolism	0.602988	3	1.04	Q8CQU3	618	K	Methionine--tRNA ligase	metG
map00450 Selenocompound metabolism	0.602988	3	1.04	Q8CQU3	583	K	Methionine--tRNA ligase	metG
map00450 Selenocompound metabolism	0.602988	3	1.04	Q8CQU3	102	K	Methionine--tRNA ligase	metG
map00450 Selenocompound metabolism	0.602988	3	1.04	Q8CQU3	609	K	Methionine--tRNA ligase	metG
map00450 Selenocompound metabolism	0.602988	3	1.04	Q8CQU3	574	K	Methionine--tRNA ligase	metG
map00450 Selenocompound metabolism	0.602988	3	1.04	Q8CTA4	13	K	Probable cysteine desulfurase	csd
map00450 Selenocompound metabolism	0.602988	3	1.04	Q8CPY8	191	K	Thioredoxin reductase	trxB
map00450 Selenocompound metabolism	0.602988	3	1.04	Q8CPY8	89	K	Thioredoxin reductase	trxB
map00450 Selenocompound metabolism	0.602988	3	1.04	Q8CPY8	73	K	Thioredoxin reductase	trxB
map00450 Selenocompound metabolism	0.602988	3	1.04	Q8CPY8	117	K	Thioredoxin reductase	trxB
map00660 C5-Branched dibasic acid metabolism	0.788491	3	0.81	Q8CPH4	243	K	Succinate--CoA ligase [ADP-forming] subunit alpha	sucD
map00660 C5-Branched dibasic acid metabolism	0.788491	3	0.81	Q8CPH4	145	K	Succinate--CoA ligase [ADP-forming] subunit alpha	sucD
map00660 C5-Branched dibasic acid metabolism	0.788491	3	0.81	Q8CPH4	144	K	Succinate--CoA ligase [ADP-forming] subunit alpha	sucD
map00660 C5-Branched dibasic acid metabolism	0.788491	3	0.81	Q8CPH4	7	K	Succinate--CoA ligase [ADP-forming] subunit alpha	sucD
map00660 C5-Branched dibasic acid metabolism	0.788491	3	0.81	Q8CPH4	301	K	Succinate--CoA ligase [ADP-forming] subunit alpha	sucD
map00660 C5-Branched dibasic acid metabolism	0.788491	3	0.81	Q8CPH5	61	K	Succinate--CoA ligase [ADP-forming] subunit beta	sucC
map00660 C5-Branched dibasic acid metabolism	0.788491	3	0.81	Q8CPH5	227	K	Succinate--CoA ligase [ADP-forming] subunit beta	sucC
map00660 C5-Branched dibasic acid metabolism	0.788491	3	0.81	Q8CPH5	146	K	Succinate--CoA ligase [ADP-forming] subunit beta	sucC
map00660 C5-Branched dibasic acid metabolism	0.788491	3	0.81	Q8CPH5	297	K	Succinate--CoA ligase [ADP-forming] subunit beta	sucC
map00660 C5-Branched dibasic acid metabolism	0.788491	3	0.81	Q8CPH5	176	K	Succinate--CoA ligase [ADP-forming] subunit beta	sucC
map00660 C5-Branched dibasic acid metabolism	0.788491	3	0.81	A0A0H2VKH0	119	K	Alpha-acetolactate decarboxylase	SE_2143
map00660 C5-Branched dibasic acid metabolism	0.788491	3	0.81	A0A0H2VKH0	80	K	Alpha-acetolactate decarboxylase	SE_2143
map00660 C5-Branched dibasic acid metabolism	0.788491	3	0.81	A0A0H2VKH0	100	K	Alpha-acetolactate decarboxylase	SE_2143
map03070 Bacterial secretion system	0.851662	4	0.75	Q8CPZ2	468	K	Protein translocase subunit SecA 1	secA1
map03070 Bacterial secretion system	0.851662	4	0.75	Q8CPZ2	809	K	Protein translocase subunit SecA 1	secA1
map03070 Bacterial secretion system	0.851662	4	0.75	Q8CPZ2	838	K	Protein translocase subunit SecA 1	secA1
map03070 Bacterial secretion system	0.851662	4	0.75	Q8CPZ2	58	K	Protein translocase subunit SecA 1	secA1
map03070 Bacterial secretion system	0.851662	4	0.75	A0A0H2VGW9	443	K	Protein-export membrane protein SecDF	SE_1320
map03070 Bacterial secretion system	0.851662	4	0.75	Q8CMK8	124	K	Membrane protein insertase YidC 1	yidC1
map03070 Bacterial secretion system	0.851662	4	0.75	A0A0H2VI90	269	K	Signal recognition particle protein	ffh
map03070 Bacterial secretion system	0.851662	4	0.75	A0A0H2VI90	22	K	Signal recognition particle protein	ffh
map03070 Bacterial secretion system	0.851662	4	0.75	A0A0H2VI90	424	K	Signal recognition particle protein	ffh
map00250 Alanine, aspartate and glutamate metabolism	0.861271	6	0.77	Q8CN04	281	K	1-pyrroline-5-carboxylate dehydrogenase	rocA
map00250 Alanine, aspartate and glutamate metabolism	0.861271	6	0.77	Q8CN04	378	K	1-pyrroline-5-carboxylate dehydrogenase	rocA
map00250 Alanine, aspartate and glutamate metabolism	0.861271	6	0.77	Q8CRL1	56	K	Glutamine--fructose-6-phosphate aminotransferase [isomerizing]	glmS
map00250 Alanine, aspartate and glutamate metabolism	0.861271	6	0.77	Q8CRL1	590	K	Glutamine--fructose-6-phosphate aminotransferase [isomerizing]	glmS
map00250 Alanine, aspartate and glutamate metabolism	0.861271	6	0.77	Q8CRL1	216	K	Glutamine--fructose-6-phosphate aminotransferase [isomerizing]	glmS
map00250 Alanine, aspartate and glutamate metabolism	0.861271	6	0.77	Q8CRL1	275	K	Glutamine--fructose-6-phosphate aminotransferase [isomerizing]	glmS
map00250 Alanine, aspartate and glutamate metabolism	0.861271	6	0.77	Q8CRL1	531	K	Glutamine--fructose-6-phosphate aminotransferase [isomerizing]	glmS
map00250 Alanine, aspartate and glutamate metabolism	0.861271	6	0.77	Q8CRL1	223	K	Glutamine--fructose-6-phosphate aminotransferase [isomerizing]	glmS
map00250 Alanine, aspartate and glutamate metabolism	0.861271	6	0.77	Q8CQK1	197	K	Adenylosuccinate synthetase	purA
map00250 Alanine, aspartate and glutamate metabolism	0.861271	6	0.77	Q8CQK1	153	K	Adenylosuccinate synthetase	purA
map00250 Alanine, aspartate and glutamate metabolism	0.861271	6	0.77	Q8CSR8	13	K	Glutamine synthetase	glnA
map00250 Alanine, aspartate and glutamate metabolism	0.861271	6	0.77	Q8CSR8	226	K	Glutamine synthetase	glnA
map00250 Alanine, aspartate and glutamate metabolism	0.861271	6	0.77	Q8CRT6	268	K	Adenylosuccinate lyase	purB
map00250 Alanine, aspartate and glutamate metabolism	0.861271	6	0.77	Q8CRT6	115	K	Adenylosuccinate lyase	purB
map00250 Alanine, aspartate and glutamate metabolism	0.861271	6	0.77	Q8CNW8	74	K	Alanine dehydrogenase	ald
map00250 Alanine, aspartate and glutamate metabolism	0.861271	6	0.77	Q8CNW8	169	K	Alanine dehydrogenase	ald
map00250 Alanine, aspartate and glutamate metabolism	0.861271	6	0.77	Q8CNW8	7	K	Alanine dehydrogenase	ald
map00250 Alanine, aspartate and glutamate metabolism	0.861271	6	0.77	Q8CNW8	10	K	Alanine dehydrogenase	ald
map05134 Legionellosis	0.366809	2	1.62	A0A0H2VG08	38	K	Succinate dehydrogenase flavoprotein subunit	SE_0841
map05134 Legionellosis	0.366809	2	1.62	A0A0H2VG08	450	K	Succinate dehydrogenase flavoprotein subunit	SE_0841
map05134 Legionellosis	0.366809	2	1.62	A0A0H2VG08	534	K	Succinate dehydrogenase flavoprotein subunit	SE_0841
map05134 Legionellosis	0.366809	2	1.62	A0A0H2VG08	477	K	Succinate dehydrogenase flavoprotein subunit	SE_0841
map05134 Legionellosis	0.366809	2	1.62	P0C0N7	360	K	60 kDa chaperonin	groL
map05134 Legionellosis	0.366809	2	1.62	P0C0N7	388	K	60 kDa chaperonin	groL
map05134 Legionellosis	0.366809	2	1.62	P0C0N7	140	K	60 kDa chaperonin	groL
map00680 Methane metabolism	0.0126182	12	1.72	Q8CS68	212	K	ATP-dependent 6-phosphofructokinase	pfkA
map00680 Methane metabolism	0.0126182	12	1.72	Q8CS68	77	K	ATP-dependent 6-phosphofructokinase	pfkA
map00680 Methane metabolism	0.0126182	12	1.72	Q8CN61	98	K	"2,3-bisphosphoglycerate-dependent phosphoglycerate mutase"	gpmA
map00680 Methane metabolism	0.0126182	12	1.72	A0A0H2VIL4	137	K	Acetate-CoA ligase	SE_2161
map00680 Methane metabolism	0.0126182	12	1.72	A0A0H2VIL4	27	K	Acetate-CoA ligase	SE_2161
map00680 Methane metabolism	0.0126182	12	1.72	A0A0H2VIL4	103	K	Acetate-CoA ligase	SE_2161
map00680 Methane metabolism	0.0126182	12	1.72	A0A0H2VIL4	492	K	Acetate-CoA ligase	SE_2161
map00680 Methane metabolism	0.0126182	12	1.72	A0A0H2VIL4	383	K	Acetate-CoA ligase	SE_2161
map00680 Methane metabolism	0.0126182	12	1.72	A0A0H2VIL4	525	K	Acetate-CoA ligase	SE_2161
map00680 Methane metabolism	0.0126182	12	1.72	Q8CN27	292	K	"Fructose-1,6-bisphosphatase class 3"	fbp
map00680 Methane metabolism	0.0126182	12	1.72	Q8CNI3	269	K	Fructose-bisphosphate aldolase	fba
map00680 Methane metabolism	0.0126182	12	1.72	Q8CNI3	252	K	Fructose-bisphosphate aldolase	fba
map00680 Methane metabolism	0.0126182	12	1.72	Q8CNI3	259	K	Fructose-bisphosphate aldolase	fba
map00680 Methane metabolism	0.0126182	12	1.72	Q8CNI3	185	K	Fructose-bisphosphate aldolase	fba
map00680 Methane metabolism	0.0126182	12	1.72	Q8CNI3	7	K	Fructose-bisphosphate aldolase	fba
map00680 Methane metabolism	0.0126182	12	1.72	Q8CQ69	169	K	3-hexulose-6-phosphate synthase	SE_0341
map00680 Methane metabolism	0.0126182	12	1.72	Q8CQ69	101	K	3-hexulose-6-phosphate synthase	SE_0341
map00680 Methane metabolism	0.0126182	12	1.72	Q8CMY5	104	K	Fructose-bisphosphate aldolase class 1	fda
map00680 Methane metabolism	0.0126182	12	1.72	Q8CMY5	251	K	Fructose-bisphosphate aldolase class 1	fda
map00680 Methane metabolism	0.0126182	12	1.72	Q8CMY5	190	K	Fructose-bisphosphate aldolase class 1	fda
map00680 Methane metabolism	0.0126182	12	1.72	Q8CMY5	185	K	Fructose-bisphosphate aldolase class 1	fda
map00680 Methane metabolism	0.0126182	12	1.72	Q8CMY5	3	K	Fructose-bisphosphate aldolase class 1	fda
map00680 Methane metabolism	0.0126182	12	1.72	Q8CMY5	138	K	Fructose-bisphosphate aldolase class 1	fda
map00680 Methane metabolism	0.0126182	12	1.72	Q8CMY5	295	K	Fructose-bisphosphate aldolase class 1	fda
map00680 Methane metabolism	0.0126182	12	1.72	Q8CMY5	8	K	Fructose-bisphosphate aldolase class 1	fda
map00680 Methane metabolism	0.0126182	12	1.72	Q8CMY5	101	K	Fructose-bisphosphate aldolase class 1	fda
map00680 Methane metabolism	0.0126182	12	1.72	Q8CMY5	117	K	Fructose-bisphosphate aldolase class 1	fda
map00680 Methane metabolism	0.0126182	12	1.72	Q8CMY5	223	K	Fructose-bisphosphate aldolase class 1	fda
map00680 Methane metabolism	0.0126182	12	1.72	Q8CPY3	406	K	Enolase	eno
map00680 Methane metabolism	0.0126182	12	1.72	Q8CPY3	268	K	Enolase	eno
map00680 Methane metabolism	0.0126182	12	1.72	Q8CS60	357	K	Acetate kinase	ackA
map00680 Methane metabolism	0.0126182	12	1.72	Q8CS60	175	K	Acetate kinase	ackA
map00680 Methane metabolism	0.0126182	12	1.72	Q8CS60	79	K	Acetate kinase	ackA
map00680 Methane metabolism	0.0126182	12	1.72	Q8CQ62	210	K	Phosphate acetyltransferase	pta
map00680 Methane metabolism	0.0126182	12	1.72	Q8CRN3	350	K	Serine hydroxymethyltransferase	glyA
map00680 Methane metabolism	0.0126182	12	1.72	Q8CRN3	348	K	Serine hydroxymethyltransferase	glyA
map00680 Methane metabolism	0.0126182	12	1.72	Q8CRN3	243	K	Serine hydroxymethyltransferase	glyA
map00680 Methane metabolism	0.0126182	12	1.72	Q8CRN3	184	K	Serine hydroxymethyltransferase	glyA
map00680 Methane metabolism	0.0126182	12	1.72	Q8CPY4	170	K	"2,3-bisphosphoglycerate-independent phosphoglycerate mutase"	gpmI
map00680 Methane metabolism	0.0126182	12	1.72	Q8CPY4	330	K	"2,3-bisphosphoglycerate-independent phosphoglycerate mutase"	gpmI
map00680 Methane metabolism	0.0126182	12	1.72	Q8CPY4	3	K	"2,3-bisphosphoglycerate-independent phosphoglycerate mutase"	gpmI
map00680 Methane metabolism	0.0126182	12	1.72	Q8CPY4	30	K	"2,3-bisphosphoglycerate-independent phosphoglycerate mutase"	gpmI
map00680 Methane metabolism	0.0126182	12	1.72	Q8CPY4	504	K	"2,3-bisphosphoglycerate-independent phosphoglycerate mutase"	gpmI
map00627 Aminobenzoate degradation	0.652585	1	1.22	A0A0H2VG48	4	K	Acylphosphatase	SE_1087
map00020 Citrate cycle (TCA cycle)	7.53606e-06	23	2	A0A0H2VI31	161	K	Dihydrolipoyl dehydrogenase	SE_0794
map00020 Citrate cycle (TCA cycle)	7.53606e-06	23	2	A0A0H2VI31	34	K	Dihydrolipoyl dehydrogenase	SE_0794
map00020 Citrate cycle (TCA cycle)	7.53606e-06	23	2	A0A0H2VI31	379	K	Dihydrolipoyl dehydrogenase	SE_0794
map00020 Citrate cycle (TCA cycle)	7.53606e-06	23	2	A0A0H2VI31	376	K	Dihydrolipoyl dehydrogenase	SE_0794
map00020 Citrate cycle (TCA cycle)	7.53606e-06	23	2	A0A0H2VI31	230	K	Dihydrolipoyl dehydrogenase	SE_0794
map00020 Citrate cycle (TCA cycle)	7.53606e-06	23	2	A0A0H2VI31	224	K	Dihydrolipoyl dehydrogenase	SE_0794
map00020 Citrate cycle (TCA cycle)	7.53606e-06	23	2	A0A0H2VI31	111	K	Dihydrolipoyl dehydrogenase	SE_0794
map00020 Citrate cycle (TCA cycle)	7.53606e-06	23	2	A0A0H2VG08	38	K	Succinate dehydrogenase flavoprotein subunit	SE_0841
map00020 Citrate cycle (TCA cycle)	7.53606e-06	23	2	A0A0H2VG08	450	K	Succinate dehydrogenase flavoprotein subunit	SE_0841
map00020 Citrate cycle (TCA cycle)	7.53606e-06	23	2	A0A0H2VG08	534	K	Succinate dehydrogenase flavoprotein subunit	SE_0841
map00020 Citrate cycle (TCA cycle)	7.53606e-06	23	2	A0A0H2VG08	477	K	Succinate dehydrogenase flavoprotein subunit	SE_0841
map00020 Citrate cycle (TCA cycle)	7.53606e-06	23	2	A0A0H2VEG1	393	K	Dihydrolipoyl dehydrogenase	SE_0253
map00020 Citrate cycle (TCA cycle)	7.53606e-06	23	2	Q8CMY4	189	K	Probable malate:quinone oxidoreductase 4	mqo4
map00020 Citrate cycle (TCA cycle)	7.53606e-06	23	2	Q8CMY4	155	K	Probable malate:quinone oxidoreductase 4	mqo4
map00020 Citrate cycle (TCA cycle)	7.53606e-06	23	2	Q8CMY4	455	K	Probable malate:quinone oxidoreductase 4	mqo4
map00020 Citrate cycle (TCA cycle)	7.53606e-06	23	2	Q8CMY4	167	K	Probable malate:quinone oxidoreductase 4	mqo4
map00020 Citrate cycle (TCA cycle)	7.53606e-06	23	2	Q8CMY4	81	K	Probable malate:quinone oxidoreductase 4	mqo4
map00020 Citrate cycle (TCA cycle)	7.53606e-06	23	2	Q8CMY4	205	K	Probable malate:quinone oxidoreductase 4	mqo4
map00020 Citrate cycle (TCA cycle)	7.53606e-06	23	2	Q8CMY4	401	K	Probable malate:quinone oxidoreductase 4	mqo4
map00020 Citrate cycle (TCA cycle)	7.53606e-06	23	2	Q8CMY4	126	K	Probable malate:quinone oxidoreductase 4	mqo4
map00020 Citrate cycle (TCA cycle)	7.53606e-06	23	2	Q8CMY4	290	K	Probable malate:quinone oxidoreductase 4	mqo4
map00020 Citrate cycle (TCA cycle)	7.53606e-06	23	2	A0A0H2VI57	7	K	Succinate dehydrogenase iron-sulfur protein subunit	SE_0842
map00020 Citrate cycle (TCA cycle)	7.53606e-06	23	2	A0A0H2VI57	146	K	Succinate dehydrogenase iron-sulfur protein subunit	SE_0842
map00020 Citrate cycle (TCA cycle)	7.53606e-06	23	2	Q8CQE8	488	K	Probable malate:quinone oxidoreductase 3	mqo3
map00020 Citrate cycle (TCA cycle)	7.53606e-06	23	2	Q8CQE8	218	K	Probable malate:quinone oxidoreductase 3	mqo3
map00020 Citrate cycle (TCA cycle)	7.53606e-06	23	2	Q8CN91	401	K	Probable malate:quinone oxidoreductase 1	mqo1
map00020 Citrate cycle (TCA cycle)	7.53606e-06	23	2	Q8CN91	212	K	Probable malate:quinone oxidoreductase 1	mqo1
map00020 Citrate cycle (TCA cycle)	7.53606e-06	23	2	Q8CN91	33	K	Probable malate:quinone oxidoreductase 1	mqo1
map00020 Citrate cycle (TCA cycle)	7.53606e-06	23	2	Q8CN91	286	K	Probable malate:quinone oxidoreductase 1	mqo1
map00020 Citrate cycle (TCA cycle)	7.53606e-06	23	2	Q8CN91	486	K	Probable malate:quinone oxidoreductase 1	mqo1
map00020 Citrate cycle (TCA cycle)	7.53606e-06	23	2	Q8CN91	461	K	Probable malate:quinone oxidoreductase 1	mqo1
map00020 Citrate cycle (TCA cycle)	7.53606e-06	23	2	Q8CN91	275	K	Probable malate:quinone oxidoreductase 1	mqo1
map00020 Citrate cycle (TCA cycle)	7.53606e-06	23	2	A0A0H2VFQ9	634	K	Pyruvate carboxylase	SE_0813
map00020 Citrate cycle (TCA cycle)	7.53606e-06	23	2	Q8CNR1	172	K	Fumarate hydratase class II	fumC
map00020 Citrate cycle (TCA cycle)	7.53606e-06	23	2	Q8CPC2	391	K	Aconitate hydratase A	acnA
map00020 Citrate cycle (TCA cycle)	7.53606e-06	23	2	Q8CPC2	6	K	Aconitate hydratase A	acnA
map00020 Citrate cycle (TCA cycle)	7.53606e-06	23	2	Q8CPC2	664	K	Aconitate hydratase A	acnA
map00020 Citrate cycle (TCA cycle)	7.53606e-06	23	2	Q8CPC2	416	K	Aconitate hydratase A	acnA
map00020 Citrate cycle (TCA cycle)	7.53606e-06	23	2	Q8CPC2	105	K	Aconitate hydratase A	acnA
map00020 Citrate cycle (TCA cycle)	7.53606e-06	23	2	Q8CPC2	82	K	Aconitate hydratase A	acnA
map00020 Citrate cycle (TCA cycle)	7.53606e-06	23	2	Q8CSL9	239	K	Dihydrolipoyllysine-residue succinyltransferase component of 2-oxoglutarate dehydrogenase complex	odhB
map00020 Citrate cycle (TCA cycle)	7.53606e-06	23	2	Q8CSL9	262	K	Dihydrolipoyllysine-residue succinyltransferase component of 2-oxoglutarate dehydrogenase complex	odhB
map00020 Citrate cycle (TCA cycle)	7.53606e-06	23	2	Q8CSL9	187	K	Dihydrolipoyllysine-residue succinyltransferase component of 2-oxoglutarate dehydrogenase complex	odhB
map00020 Citrate cycle (TCA cycle)	7.53606e-06	23	2	Q8CSL9	404	K	Dihydrolipoyllysine-residue succinyltransferase component of 2-oxoglutarate dehydrogenase complex	odhB
map00020 Citrate cycle (TCA cycle)	7.53606e-06	23	2	Q8CQ96	196	K	Probable malate:quinone oxidoreductase 2	mqo2
map00020 Citrate cycle (TCA cycle)	7.53606e-06	23	2	A0A0H2VEM3	152	K	Dihydrolipoamide acetyltransferase component of pyruvate dehydrogenase complex	SE_0256
map00020 Citrate cycle (TCA cycle)	7.53606e-06	23	2	A0A0H2VEM3	103	K	Dihydrolipoamide acetyltransferase component of pyruvate dehydrogenase complex	SE_0256
map00020 Citrate cycle (TCA cycle)	7.53606e-06	23	2	A0A0H2VEM3	96	K	Dihydrolipoamide acetyltransferase component of pyruvate dehydrogenase complex	SE_0256
map00020 Citrate cycle (TCA cycle)	7.53606e-06	23	2	Q8CPH4	243	K	Succinate--CoA ligase [ADP-forming] subunit alpha	sucD
map00020 Citrate cycle (TCA cycle)	7.53606e-06	23	2	Q8CPH4	145	K	Succinate--CoA ligase [ADP-forming] subunit alpha	sucD
map00020 Citrate cycle (TCA cycle)	7.53606e-06	23	2	Q8CPH4	144	K	Succinate--CoA ligase [ADP-forming] subunit alpha	sucD
map00020 Citrate cycle (TCA cycle)	7.53606e-06	23	2	Q8CPH4	7	K	Succinate--CoA ligase [ADP-forming] subunit alpha	sucD
map00020 Citrate cycle (TCA cycle)	7.53606e-06	23	2	Q8CPH4	301	K	Succinate--CoA ligase [ADP-forming] subunit alpha	sucD
map00020 Citrate cycle (TCA cycle)	7.53606e-06	23	2	A0A0H2VFY4	405	K	Putative 2-oxoacid ferredoxin oxidoreductase alpha subunit	SE_0967
map00020 Citrate cycle (TCA cycle)	7.53606e-06	23	2	Q8CNX4	163	K	Isocitrate dehydrogenase [NADP]	icd
map00020 Citrate cycle (TCA cycle)	7.53606e-06	23	2	Q8CNX4	189	K	Isocitrate dehydrogenase [NADP]	icd
map00020 Citrate cycle (TCA cycle)	7.53606e-06	23	2	Q8CNX4	225	K	Isocitrate dehydrogenase [NADP]	icd
map00020 Citrate cycle (TCA cycle)	7.53606e-06	23	2	Q8CNX4	132	K	Isocitrate dehydrogenase [NADP]	icd
map00020 Citrate cycle (TCA cycle)	7.53606e-06	23	2	Q8CNX4	262	K	Isocitrate dehydrogenase [NADP]	icd
map00020 Citrate cycle (TCA cycle)	7.53606e-06	23	2	Q8CNX4	58	K	Isocitrate dehydrogenase [NADP]	icd
map00020 Citrate cycle (TCA cycle)	7.53606e-06	23	2	Q8CPH5	61	K	Succinate--CoA ligase [ADP-forming] subunit beta	sucC
map00020 Citrate cycle (TCA cycle)	7.53606e-06	23	2	Q8CPH5	227	K	Succinate--CoA ligase [ADP-forming] subunit beta	sucC
map00020 Citrate cycle (TCA cycle)	7.53606e-06	23	2	Q8CPH5	146	K	Succinate--CoA ligase [ADP-forming] subunit beta	sucC
map00020 Citrate cycle (TCA cycle)	7.53606e-06	23	2	Q8CPH5	297	K	Succinate--CoA ligase [ADP-forming] subunit beta	sucC
map00020 Citrate cycle (TCA cycle)	7.53606e-06	23	2	Q8CPH5	176	K	Succinate--CoA ligase [ADP-forming] subunit beta	sucC
map00020 Citrate cycle (TCA cycle)	7.53606e-06	23	2	Q8CT13	274	K	Dihydrolipoyllysine-residue acetyltransferase component of pyruvate dehydrogenase complex	pdhC
map00020 Citrate cycle (TCA cycle)	7.53606e-06	23	2	Q8CT13	382	K	Dihydrolipoyllysine-residue acetyltransferase component of pyruvate dehydrogenase complex	pdhC
map00020 Citrate cycle (TCA cycle)	7.53606e-06	23	2	Q8CT13	338	K	Dihydrolipoyllysine-residue acetyltransferase component of pyruvate dehydrogenase complex	pdhC
map00020 Citrate cycle (TCA cycle)	7.53606e-06	23	2	Q8CT13	273	K	Dihydrolipoyllysine-residue acetyltransferase component of pyruvate dehydrogenase complex	pdhC
map00020 Citrate cycle (TCA cycle)	7.53606e-06	23	2	Q8CT13	248	K	Dihydrolipoyllysine-residue acetyltransferase component of pyruvate dehydrogenase complex	pdhC
map00020 Citrate cycle (TCA cycle)	7.53606e-06	23	2	Q8CT13	97	K	Dihydrolipoyllysine-residue acetyltransferase component of pyruvate dehydrogenase complex	pdhC
map00020 Citrate cycle (TCA cycle)	7.53606e-06	23	2	Q8CT13	420	K	Dihydrolipoyllysine-residue acetyltransferase component of pyruvate dehydrogenase complex	pdhC
map00020 Citrate cycle (TCA cycle)	7.53606e-06	23	2	A0A0H2VJ27	365	K	Citrate synthase	SE_1371
map00020 Citrate cycle (TCA cycle)	7.53606e-06	23	2	A0A0H2VJ27	64	K	Citrate synthase	SE_1371
map00020 Citrate cycle (TCA cycle)	7.53606e-06	23	2	A0A0H2VJ27	357	K	Citrate synthase	SE_1371
map00020 Citrate cycle (TCA cycle)	7.53606e-06	23	2	A0A0H2VJ27	117	K	Citrate synthase	SE_1371
map00020 Citrate cycle (TCA cycle)	7.53606e-06	23	2	A0A0H2VJ27	262	K	Citrate synthase	SE_1371
map00020 Citrate cycle (TCA cycle)	7.53606e-06	23	2	Q8CPN2	109	K	Pyruvate dehydrogenase E1 component subunit beta	pdhB
map00020 Citrate cycle (TCA cycle)	7.53606e-06	23	2	Q8CPN2	190	K	Pyruvate dehydrogenase E1 component subunit beta	pdhB
map00020 Citrate cycle (TCA cycle)	7.53606e-06	23	2	Q8CPN2	312	K	Pyruvate dehydrogenase E1 component subunit beta	pdhB
map00020 Citrate cycle (TCA cycle)	7.53606e-06	23	2	Q8CPN2	46	K	Pyruvate dehydrogenase E1 component subunit beta	pdhB
map00020 Citrate cycle (TCA cycle)	7.53606e-06	23	2	Q8CPN3	315	K	Pyruvate dehydrogenase E1 component subunit alpha	pdhA
map00020 Citrate cycle (TCA cycle)	7.53606e-06	23	2	Q8CPN3	214	K	Pyruvate dehydrogenase E1 component subunit alpha	pdhA
map00020 Citrate cycle (TCA cycle)	7.53606e-06	23	2	Q8CS25	513	K	Phosphoenolpyruvate carboxykinase [ATP]	pckA
map00020 Citrate cycle (TCA cycle)	7.53606e-06	23	2	Q8CS25	54	K	Phosphoenolpyruvate carboxykinase [ATP]	pckA
map00020 Citrate cycle (TCA cycle)	7.53606e-06	23	2	Q8CP83	572	K	2-oxoglutarate dehydrogenase E1 component	odhA
map00020 Citrate cycle (TCA cycle)	7.53606e-06	23	2	Q8CP83	149	K	2-oxoglutarate dehydrogenase E1 component	odhA
map00020 Citrate cycle (TCA cycle)	7.53606e-06	23	2	Q8CP83	191	K	2-oxoglutarate dehydrogenase E1 component	odhA
map00020 Citrate cycle (TCA cycle)	7.53606e-06	23	2	Q8CP83	859	K	2-oxoglutarate dehydrogenase E1 component	odhA
map00020 Citrate cycle (TCA cycle)	7.53606e-06	23	2	Q8CP83	210	K	2-oxoglutarate dehydrogenase E1 component	odhA
map00020 Citrate cycle (TCA cycle)	7.53606e-06	23	2	Q8CP83	73	K	2-oxoglutarate dehydrogenase E1 component	odhA
map00020 Citrate cycle (TCA cycle)	7.53606e-06	23	2	Q8CP83	898	K	2-oxoglutarate dehydrogenase E1 component	odhA
map00020 Citrate cycle (TCA cycle)	7.53606e-06	23	2	Q8CP83	520	K	2-oxoglutarate dehydrogenase E1 component	odhA
map05150 Staphylococcus aureus infection	0.974759	2	0.44	Q8CPC0	304	K	Phosphatidylglycerol lysyltransferase	mprF
map05150 Staphylococcus aureus infection	0.974759	2	0.44	Q8CQD9	738	K	Accumulation-associated protein	SE_0175
map05150 Staphylococcus aureus infection	0.974759	2	0.44	Q8CQD9	251	K	Accumulation-associated protein	SE_0175
map05150 Staphylococcus aureus infection	0.974759	2	0.44	Q8CQD9	280	K	Accumulation-associated protein	SE_0175
map05150 Staphylococcus aureus infection	0.974759	2	0.44	Q8CQD9	680	K	Accumulation-associated protein	SE_0175
map05150 Staphylococcus aureus infection	0.974759	2	0.44	Q8CQD9	552	K	Accumulation-associated protein	SE_0175
map05150 Staphylococcus aureus infection	0.974759	2	0.44	Q8CQD9	601	K	Accumulation-associated protein	SE_0175
map05150 Staphylococcus aureus infection	0.974759	2	0.44	Q8CQD9	610	K	Accumulation-associated protein	SE_0175
map05150 Staphylococcus aureus infection	0.974759	2	0.44	Q8CQD9	478	K	Accumulation-associated protein	SE_0175
map00380 Tryptophan metabolism	0.111128	7	1.55	A0A0H2VI31	161	K	Dihydrolipoyl dehydrogenase	SE_0794
map00380 Tryptophan metabolism	0.111128	7	1.55	A0A0H2VI31	34	K	Dihydrolipoyl dehydrogenase	SE_0794
map00380 Tryptophan metabolism	0.111128	7	1.55	A0A0H2VI31	379	K	Dihydrolipoyl dehydrogenase	SE_0794
map00380 Tryptophan metabolism	0.111128	7	1.55	A0A0H2VI31	376	K	Dihydrolipoyl dehydrogenase	SE_0794
map00380 Tryptophan metabolism	0.111128	7	1.55	A0A0H2VI31	230	K	Dihydrolipoyl dehydrogenase	SE_0794
map00380 Tryptophan metabolism	0.111128	7	1.55	A0A0H2VI31	224	K	Dihydrolipoyl dehydrogenase	SE_0794
map00380 Tryptophan metabolism	0.111128	7	1.55	A0A0H2VI31	111	K	Dihydrolipoyl dehydrogenase	SE_0794
map00380 Tryptophan metabolism	0.111128	7	1.55	Q8CNI5	292	K	Putative aldehyde dehydrogenase SE_1720	SE_1720
map00380 Tryptophan metabolism	0.111128	7	1.55	Q8CNI5	351	K	Putative aldehyde dehydrogenase SE_1720	SE_1720
map00380 Tryptophan metabolism	0.111128	7	1.55	Q8CNI5	270	K	Putative aldehyde dehydrogenase SE_1720	SE_1720
map00380 Tryptophan metabolism	0.111128	7	1.55	Q8CN24	354	K	Putative aldehyde dehydrogenase AldA	aldA
map00380 Tryptophan metabolism	0.111128	7	1.55	Q8CN24	312	K	Putative aldehyde dehydrogenase AldA	aldA
map00380 Tryptophan metabolism	0.111128	7	1.55	Q8CN24	463	K	Putative aldehyde dehydrogenase AldA	aldA
map00380 Tryptophan metabolism	0.111128	7	1.55	Q8CN24	473	K	Putative aldehyde dehydrogenase AldA	aldA
map00380 Tryptophan metabolism	0.111128	7	1.55	A0A0H2VJG4	257	K	Aldehyde dehydrogenase	SE_1603
map00380 Tryptophan metabolism	0.111128	7	1.55	A0A0H2VEG1	393	K	Dihydrolipoyl dehydrogenase	SE_0253
map00380 Tryptophan metabolism	0.111128	7	1.55	Q8CPD0	470	K	Catalase	katA
map00380 Tryptophan metabolism	0.111128	7	1.55	Q8CSL9	239	K	Dihydrolipoyllysine-residue succinyltransferase component of 2-oxoglutarate dehydrogenase complex	odhB
map00380 Tryptophan metabolism	0.111128	7	1.55	Q8CSL9	262	K	Dihydrolipoyllysine-residue succinyltransferase component of 2-oxoglutarate dehydrogenase complex	odhB
map00380 Tryptophan metabolism	0.111128	7	1.55	Q8CSL9	187	K	Dihydrolipoyllysine-residue succinyltransferase component of 2-oxoglutarate dehydrogenase complex	odhB
map00380 Tryptophan metabolism	0.111128	7	1.55	Q8CSL9	404	K	Dihydrolipoyllysine-residue succinyltransferase component of 2-oxoglutarate dehydrogenase complex	odhB
map00280 Valine, leucine and isoleucine degradation	0.167962	8	1.39	A0A0H2VI31	161	K	Dihydrolipoyl dehydrogenase	SE_0794
map00280 Valine, leucine and isoleucine degradation	0.167962	8	1.39	A0A0H2VI31	34	K	Dihydrolipoyl dehydrogenase	SE_0794
map00280 Valine, leucine and isoleucine degradation	0.167962	8	1.39	A0A0H2VI31	379	K	Dihydrolipoyl dehydrogenase	SE_0794
map00280 Valine, leucine and isoleucine degradation	0.167962	8	1.39	A0A0H2VI31	376	K	Dihydrolipoyl dehydrogenase	SE_0794
map00280 Valine, leucine and isoleucine degradation	0.167962	8	1.39	A0A0H2VI31	230	K	Dihydrolipoyl dehydrogenase	SE_0794
map00280 Valine, leucine and isoleucine degradation	0.167962	8	1.39	A0A0H2VI31	224	K	Dihydrolipoyl dehydrogenase	SE_0794
map00280 Valine, leucine and isoleucine degradation	0.167962	8	1.39	A0A0H2VI31	111	K	Dihydrolipoyl dehydrogenase	SE_0794
map00280 Valine, leucine and isoleucine degradation	0.167962	8	1.39	A0A0H2VIB1	68	K	3-hydroxy-3-methylglutaryl CoA synthase	SE_2110
map00280 Valine, leucine and isoleucine degradation	0.167962	8	1.39	A0A0H2VGB8	267	K	Branched-chain alpha-keto acid dehydrogenase E1	SE_1198
map00280 Valine, leucine and isoleucine degradation	0.167962	8	1.39	A0A0H2VGB8	15	K	Branched-chain alpha-keto acid dehydrogenase E1	SE_1198
map00280 Valine, leucine and isoleucine degradation	0.167962	8	1.39	Q8CNI5	292	K	Putative aldehyde dehydrogenase SE_1720	SE_1720
map00280 Valine, leucine and isoleucine degradation	0.167962	8	1.39	Q8CNI5	351	K	Putative aldehyde dehydrogenase SE_1720	SE_1720
map00280 Valine, leucine and isoleucine degradation	0.167962	8	1.39	Q8CNI5	270	K	Putative aldehyde dehydrogenase SE_1720	SE_1720
map00280 Valine, leucine and isoleucine degradation	0.167962	8	1.39	A0A0H2VEG1	393	K	Dihydrolipoyl dehydrogenase	SE_0253
map00280 Valine, leucine and isoleucine degradation	0.167962	8	1.39	A0A0H2VGD2	174	K	Dihydrolipoamide acetyltransferase component of pyruvate dehydrogenase complex	SE_1196
map00280 Valine, leucine and isoleucine degradation	0.167962	8	1.39	Q8CN24	354	K	Putative aldehyde dehydrogenase AldA	aldA
map00280 Valine, leucine and isoleucine degradation	0.167962	8	1.39	Q8CN24	312	K	Putative aldehyde dehydrogenase AldA	aldA
map00280 Valine, leucine and isoleucine degradation	0.167962	8	1.39	Q8CN24	463	K	Putative aldehyde dehydrogenase AldA	aldA
map00280 Valine, leucine and isoleucine degradation	0.167962	8	1.39	Q8CN24	473	K	Putative aldehyde dehydrogenase AldA	aldA
map00280 Valine, leucine and isoleucine degradation	0.167962	8	1.39	A0A0H2VJG4	257	K	Aldehyde dehydrogenase	SE_1603
map00622 Xylene degradation	0.795474	1	0.81	Q8CPB7	18	K	Probable tautomerase SE_1045	SE_1045
map00622 Xylene degradation	0.795474	1	0.81	Q8CPB7	48	K	Probable tautomerase SE_1045	SE_1045
map00333 Prodigiosin biosynthesis	0.681304	2	0.97	A0A0H2VHF4	179	K	Malonyl CoA-acyl carrier protein transacylase	SE_0905
map00333 Prodigiosin biosynthesis	0.681304	2	0.97	A0A0H2VHF4	242	K	Malonyl CoA-acyl carrier protein transacylase	SE_0905
map00333 Prodigiosin biosynthesis	0.681304	2	0.97	Q8CPI3	39	K	3-oxoacyl-[acyl-carrier-protein] reductase FabG	fabG
map00310 Lysine degradation	0.268621	6	1.33	A0A0H2VI31	161	K	Dihydrolipoyl dehydrogenase	SE_0794
map00310 Lysine degradation	0.268621	6	1.33	A0A0H2VI31	34	K	Dihydrolipoyl dehydrogenase	SE_0794
map00310 Lysine degradation	0.268621	6	1.33	A0A0H2VI31	379	K	Dihydrolipoyl dehydrogenase	SE_0794
map00310 Lysine degradation	0.268621	6	1.33	A0A0H2VI31	376	K	Dihydrolipoyl dehydrogenase	SE_0794
map00310 Lysine degradation	0.268621	6	1.33	A0A0H2VI31	230	K	Dihydrolipoyl dehydrogenase	SE_0794
map00310 Lysine degradation	0.268621	6	1.33	A0A0H2VI31	224	K	Dihydrolipoyl dehydrogenase	SE_0794
map00310 Lysine degradation	0.268621	6	1.33	A0A0H2VI31	111	K	Dihydrolipoyl dehydrogenase	SE_0794
map00310 Lysine degradation	0.268621	6	1.33	Q8CNI5	292	K	Putative aldehyde dehydrogenase SE_1720	SE_1720
map00310 Lysine degradation	0.268621	6	1.33	Q8CNI5	351	K	Putative aldehyde dehydrogenase SE_1720	SE_1720
map00310 Lysine degradation	0.268621	6	1.33	Q8CNI5	270	K	Putative aldehyde dehydrogenase SE_1720	SE_1720
map00310 Lysine degradation	0.268621	6	1.33	Q8CN24	354	K	Putative aldehyde dehydrogenase AldA	aldA
map00310 Lysine degradation	0.268621	6	1.33	Q8CN24	312	K	Putative aldehyde dehydrogenase AldA	aldA
map00310 Lysine degradation	0.268621	6	1.33	Q8CN24	463	K	Putative aldehyde dehydrogenase AldA	aldA
map00310 Lysine degradation	0.268621	6	1.33	Q8CN24	473	K	Putative aldehyde dehydrogenase AldA	aldA
map00310 Lysine degradation	0.268621	6	1.33	A0A0H2VJG4	257	K	Aldehyde dehydrogenase	SE_1603
map00310 Lysine degradation	0.268621	6	1.33	A0A0H2VEG1	393	K	Dihydrolipoyl dehydrogenase	SE_0253
map00310 Lysine degradation	0.268621	6	1.33	Q8CSL9	239	K	Dihydrolipoyllysine-residue succinyltransferase component of 2-oxoglutarate dehydrogenase complex	odhB
map00310 Lysine degradation	0.268621	6	1.33	Q8CSL9	262	K	Dihydrolipoyllysine-residue succinyltransferase component of 2-oxoglutarate dehydrogenase complex	odhB
map00310 Lysine degradation	0.268621	6	1.33	Q8CSL9	187	K	Dihydrolipoyllysine-residue succinyltransferase component of 2-oxoglutarate dehydrogenase complex	odhB
map00310 Lysine degradation	0.268621	6	1.33	Q8CSL9	404	K	Dihydrolipoyllysine-residue succinyltransferase component of 2-oxoglutarate dehydrogenase complex	odhB
map03030 DNA replication	0.855833	5	0.76	Q8CP23	350	K	DNA primase	dnaG
map03030 DNA replication	0.855833	5	0.76	Q8CP23	12	K	DNA primase	dnaG
map03030 DNA replication	0.855833	5	0.76	Q8CPG6	560	K	DNA polymerase III PolC-type	polC
map03030 DNA replication	0.855833	5	0.76	Q8CPG6	611	K	DNA polymerase III PolC-type	polC
map03030 DNA replication	0.855833	5	0.76	A0A0H2VJ04	13	K	Single-stranded DNA-binding protein	SE_2371
map03030 DNA replication	0.855833	5	0.76	A0A0H2VI81	403	K	DNA polymerase I	SE_1367
map03030 DNA replication	0.855833	5	0.76	A0A0H2VI81	668	K	DNA polymerase I	SE_1367
map03030 DNA replication	0.855833	5	0.76	Q8CQK6	189	K	DNA polymerase III subunit beta	dnaN
map03420 Nucleotide excision repair	0.855515	2	0.7	Q8CPY9	173	K	UvrABC system protein A	uvrA
map03420 Nucleotide excision repair	0.855515	2	0.7	A0A0H2VI81	403	K	DNA polymerase I	SE_1367
map03420 Nucleotide excision repair	0.855515	2	0.7	A0A0H2VI81	668	K	DNA polymerase I	SE_1367
map00791 Atrazine degradation	0.795474	1	0.81	Q8CND0	77	K	Urease subunit beta	ureB
map00650 Butanoate metabolism	0.29199	9	1.22	A0A0H2VI99	225	K	Acetoin(Diacetyl)reductase	SE_2225
map00650 Butanoate metabolism	0.29199	9	1.22	A0A0H2VG08	38	K	Succinate dehydrogenase flavoprotein subunit	SE_0841
map00650 Butanoate metabolism	0.29199	9	1.22	A0A0H2VG08	450	K	Succinate dehydrogenase flavoprotein subunit	SE_0841
map00650 Butanoate metabolism	0.29199	9	1.22	A0A0H2VG08	534	K	Succinate dehydrogenase flavoprotein subunit	SE_0841
map00650 Butanoate metabolism	0.29199	9	1.22	A0A0H2VG08	477	K	Succinate dehydrogenase flavoprotein subunit	SE_0841
map00650 Butanoate metabolism	0.29199	9	1.22	A0A0H2VIB1	68	K	3-hydroxy-3-methylglutaryl CoA synthase	SE_2110
map00650 Butanoate metabolism	0.29199	9	1.22	A0A0H2VGU2	760	K	Aldehyde-alcohol dehydrogenase	SE_0506
map00650 Butanoate metabolism	0.29199	9	1.22	A0A0H2VGU2	703	K	Aldehyde-alcohol dehydrogenase	SE_0506
map00650 Butanoate metabolism	0.29199	9	1.22	A0A0H2VGU2	307	K	Aldehyde-alcohol dehydrogenase	SE_0506
map00650 Butanoate metabolism	0.29199	9	1.22	A0A0H2VGU2	105	K	Aldehyde-alcohol dehydrogenase	SE_0506
map00650 Butanoate metabolism	0.29199	9	1.22	A0A0H2VFY4	405	K	Putative 2-oxoacid ferredoxin oxidoreductase alpha subunit	SE_0967
map00650 Butanoate metabolism	0.29199	9	1.22	A0A0H2VKH0	119	K	Alpha-acetolactate decarboxylase	SE_2143
map00650 Butanoate metabolism	0.29199	9	1.22	A0A0H2VKH0	80	K	Alpha-acetolactate decarboxylase	SE_2143
map00650 Butanoate metabolism	0.29199	9	1.22	A0A0H2VKH0	100	K	Alpha-acetolactate decarboxylase	SE_2143
map00650 Butanoate metabolism	0.29199	9	1.22	A0A0H2VI57	7	K	Succinate dehydrogenase iron-sulfur protein subunit	SE_0842
map00650 Butanoate metabolism	0.29199	9	1.22	A0A0H2VI57	146	K	Succinate dehydrogenase iron-sulfur protein subunit	SE_0842
map00650 Butanoate metabolism	0.29199	9	1.22	Q8CTX6	384	K	Formate acetyltransferase	pflB
map00650 Butanoate metabolism	0.29199	9	1.22	Q8CTX6	161	K	Formate acetyltransferase	pflB
map00650 Butanoate metabolism	0.29199	9	1.22	Q8CTX6	142	K	Formate acetyltransferase	pflB
map00650 Butanoate metabolism	0.29199	9	1.22	Q8CTX6	618	K	Formate acetyltransferase	pflB
map00650 Butanoate metabolism	0.29199	9	1.22	Q8CTX6	198	K	Formate acetyltransferase	pflB
map00650 Butanoate metabolism	0.29199	9	1.22	Q8CTX6	91	K	Formate acetyltransferase	pflB
map00650 Butanoate metabolism	0.29199	9	1.22	Q8CTX6	670	K	Formate acetyltransferase	pflB
map00650 Butanoate metabolism	0.29199	9	1.22	Q8CTX6	103	K	Formate acetyltransferase	pflB
map00650 Butanoate metabolism	0.29199	9	1.22	Q8CTX6	106	K	Formate acetyltransferase	pflB
map00650 Butanoate metabolism	0.29199	9	1.22	Q8CTX6	379	K	Formate acetyltransferase	pflB
map00650 Butanoate metabolism	0.29199	9	1.22	Q8CTX6	229	K	Formate acetyltransferase	pflB
map00650 Butanoate metabolism	0.29199	9	1.22	Q8CTX6	539	K	Formate acetyltransferase	pflB
map00650 Butanoate metabolism	0.29199	9	1.22	Q8CTX6	609	K	Formate acetyltransferase	pflB
map00650 Butanoate metabolism	0.29199	9	1.22	A0A0H2VI16	340	K	Sorbitol dehydrogenase	SE_2019
map00650 Butanoate metabolism	0.29199	9	1.22	A0A0H2VI16	23	K	Sorbitol dehydrogenase	SE_2019
map00650 Butanoate metabolism	0.29199	9	1.22	A0A0H2VI16	10	K	Sorbitol dehydrogenase	SE_2019
map00650 Butanoate metabolism	0.29199	9	1.22	A0A0H2VI16	100	K	Sorbitol dehydrogenase	SE_2019
map00410 beta-Alanine metabolism	0.477185	3	1.22	Q8CNI5	292	K	Putative aldehyde dehydrogenase SE_1720	SE_1720
map00410 beta-Alanine metabolism	0.477185	3	1.22	Q8CNI5	351	K	Putative aldehyde dehydrogenase SE_1720	SE_1720
map00410 beta-Alanine metabolism	0.477185	3	1.22	Q8CNI5	270	K	Putative aldehyde dehydrogenase SE_1720	SE_1720
map00410 beta-Alanine metabolism	0.477185	3	1.22	Q8CN24	354	K	Putative aldehyde dehydrogenase AldA	aldA
map00410 beta-Alanine metabolism	0.477185	3	1.22	Q8CN24	312	K	Putative aldehyde dehydrogenase AldA	aldA
map00410 beta-Alanine metabolism	0.477185	3	1.22	Q8CN24	463	K	Putative aldehyde dehydrogenase AldA	aldA
map00410 beta-Alanine metabolism	0.477185	3	1.22	Q8CN24	473	K	Putative aldehyde dehydrogenase AldA	aldA
map00410 beta-Alanine metabolism	0.477185	3	1.22	A0A0H2VJG4	257	K	Aldehyde dehydrogenase	SE_1603
map00860 Porphyrin and chlorophyll metabolism	0.99851	2	0.29	Q8CNZ1	337	K	"Glutamate-1-semialdehyde 2,1-aminomutase 1"	hemL1
map00860 Porphyrin and chlorophyll metabolism	0.99851	2	0.29	Q8CNZ1	5	K	"Glutamate-1-semialdehyde 2,1-aminomutase 1"	hemL1
map00860 Porphyrin and chlorophyll metabolism	0.99851	2	0.29	Q8CNS1	243	K	Ferrochelatase	hemH
map00860 Porphyrin and chlorophyll metabolism	0.99851	2	0.29	Q8CNS1	131	K	Ferrochelatase	hemH
map00460 Cyanoamino acid metabolism	0.87969	1	0.61	Q8CRN3	350	K	Serine hydroxymethyltransferase	glyA
map00460 Cyanoamino acid metabolism	0.87969	1	0.61	Q8CRN3	348	K	Serine hydroxymethyltransferase	glyA
map00460 Cyanoamino acid metabolism	0.87969	1	0.61	Q8CRN3	243	K	Serine hydroxymethyltransferase	glyA
map00460 Cyanoamino acid metabolism	0.87969	1	0.61	Q8CRN3	184	K	Serine hydroxymethyltransferase	glyA
map00053 Ascorbate and aldarate metabolism	0.0687524	3	2.44	Q8CNI5	292	K	Putative aldehyde dehydrogenase SE_1720	SE_1720
map00053 Ascorbate and aldarate metabolism	0.0687524	3	2.44	Q8CNI5	351	K	Putative aldehyde dehydrogenase SE_1720	SE_1720
map00053 Ascorbate and aldarate metabolism	0.0687524	3	2.44	Q8CNI5	270	K	Putative aldehyde dehydrogenase SE_1720	SE_1720
map00053 Ascorbate and aldarate metabolism	0.0687524	3	2.44	Q8CN24	354	K	Putative aldehyde dehydrogenase AldA	aldA
map00053 Ascorbate and aldarate metabolism	0.0687524	3	2.44	Q8CN24	312	K	Putative aldehyde dehydrogenase AldA	aldA
map00053 Ascorbate and aldarate metabolism	0.0687524	3	2.44	Q8CN24	463	K	Putative aldehyde dehydrogenase AldA	aldA
map00053 Ascorbate and aldarate metabolism	0.0687524	3	2.44	Q8CN24	473	K	Putative aldehyde dehydrogenase AldA	aldA
map00053 Ascorbate and aldarate metabolism	0.0687524	3	2.44	A0A0H2VJG4	257	K	Aldehyde dehydrogenase	SE_1603
map00983 Drug metabolism - other enzymes	0.429857	4	1.22	A0A0H2VFH6	177	K	Uncharacterized protein	SE_0693
map00983 Drug metabolism - other enzymes	0.429857	4	1.22	A0A0H2VFH6	47	K	Uncharacterized protein	SE_0693
map00983 Drug metabolism - other enzymes	0.429857	4	1.22	Q8CMQ7	453	K	Inosine-5'-monophosphate dehydrogenase	guaB
map00983 Drug metabolism - other enzymes	0.429857	4	1.22	Q8CMQ7	413	K	Inosine-5'-monophosphate dehydrogenase	guaB
map00983 Drug metabolism - other enzymes	0.429857	4	1.22	Q8CMQ7	409	K	Inosine-5'-monophosphate dehydrogenase	guaB
map00983 Drug metabolism - other enzymes	0.429857	4	1.22	Q8CMQ7	264	K	Inosine-5'-monophosphate dehydrogenase	guaB
map00983 Drug metabolism - other enzymes	0.429857	4	1.22	Q8CSI0	9	K	Nucleoside diphosphate kinase	ndk
map00983 Drug metabolism - other enzymes	0.429857	4	1.22	Q8CSI0	140	K	Nucleoside diphosphate kinase	ndk
map00983 Drug metabolism - other enzymes	0.429857	4	1.22	Q8CRM9	196	K	Thymidine kinase	tdk
map00983 Drug metabolism - other enzymes	0.429857	4	1.22	Q8CRM9	43	K	Thymidine kinase	tdk
map00561 Glycerolipid metabolism	0.00781282	14	1.71	Q8CQ10	591	K	Lipoteichoic acid synthase	ltaS
map00561 Glycerolipid metabolism	0.00781282	14	1.71	Q8CQ10	633	K	Lipoteichoic acid synthase	ltaS
map00561 Glycerolipid metabolism	0.00781282	14	1.71	Q8CQ10	622	K	Lipoteichoic acid synthase	ltaS
map00561 Glycerolipid metabolism	0.00781282	14	1.71	P59253	193	K	Glycerol-3-phosphate acyltransferase	plsY
map00561 Glycerolipid metabolism	0.00781282	14	1.71	Q8CNI5	292	K	Putative aldehyde dehydrogenase SE_1720	SE_1720
map00561 Glycerolipid metabolism	0.00781282	14	1.71	Q8CNI5	351	K	Putative aldehyde dehydrogenase SE_1720	SE_1720
map00561 Glycerolipid metabolism	0.00781282	14	1.71	Q8CNI5	270	K	Putative aldehyde dehydrogenase SE_1720	SE_1720
map00561 Glycerolipid metabolism	0.00781282	14	1.71	A0A0H2VH29	124	K	Acylglycerol-3-phosphate O-acyltransferase-like protein	SE_1404
map00561 Glycerolipid metabolism	0.00781282	14	1.71	A0A0H2VH29	206	K	Acylglycerol-3-phosphate O-acyltransferase-like protein	SE_1404
map00561 Glycerolipid metabolism	0.00781282	14	1.71	A0A0H2VHZ9	188	K	Glycerate kinase	SE_1999
map00561 Glycerolipid metabolism	0.00781282	14	1.71	A0A0H2VEK5	8	K	Dihydroxyacetone kinase	SE_0236
map00561 Glycerolipid metabolism	0.00781282	14	1.71	A0A0H2VEK5	239	K	Dihydroxyacetone kinase	SE_0236
map00561 Glycerolipid metabolism	0.00781282	14	1.71	A0A0H2VEK5	141	K	Dihydroxyacetone kinase	SE_0236
map00561 Glycerolipid metabolism	0.00781282	14	1.71	A0A0H2VEK5	171	K	Dihydroxyacetone kinase	SE_0236
map00561 Glycerolipid metabolism	0.00781282	14	1.71	Q8CPI5	261	K	Phosphate acyltransferase	plsX
map00561 Glycerolipid metabolism	0.00781282	14	1.71	A0A0H2VH40	85	K	Glycerol dehydrogenase	SE_0235
map00561 Glycerolipid metabolism	0.00781282	14	1.71	A0A0H2VH40	3	K	Glycerol dehydrogenase	SE_0235
map00561 Glycerolipid metabolism	0.00781282	14	1.71	A0A0H2VH40	196	K	Glycerol dehydrogenase	SE_0235
map00561 Glycerolipid metabolism	0.00781282	14	1.71	A0A0H2VG69	100	K	Uncharacterized protein	SE_0237
map00561 Glycerolipid metabolism	0.00781282	14	1.71	A0A0H2VG69	48	K	Uncharacterized protein	SE_0237
map00561 Glycerolipid metabolism	0.00781282	14	1.71	Q8CN24	354	K	Putative aldehyde dehydrogenase AldA	aldA
map00561 Glycerolipid metabolism	0.00781282	14	1.71	Q8CN24	312	K	Putative aldehyde dehydrogenase AldA	aldA
map00561 Glycerolipid metabolism	0.00781282	14	1.71	Q8CN24	463	K	Putative aldehyde dehydrogenase AldA	aldA
map00561 Glycerolipid metabolism	0.00781282	14	1.71	Q8CN24	473	K	Putative aldehyde dehydrogenase AldA	aldA
map00561 Glycerolipid metabolism	0.00781282	14	1.71	A0A0H2VJG4	257	K	Aldehyde dehydrogenase	SE_1603
map00561 Glycerolipid metabolism	0.00781282	14	1.71	Q8CSS0	486	K	Glycerol kinase	glpK
map00561 Glycerolipid metabolism	0.00781282	14	1.71	Q8CSS0	470	K	Glycerol kinase	glpK
map00561 Glycerolipid metabolism	0.00781282	14	1.71	Q8CSS0	141	K	Glycerol kinase	glpK
map00561 Glycerolipid metabolism	0.00781282	14	1.71	Q8CSS0	496	K	Glycerol kinase	glpK
map00561 Glycerolipid metabolism	0.00781282	14	1.71	Q8CSS0	372	K	Glycerol kinase	glpK
map00561 Glycerolipid metabolism	0.00781282	14	1.71	Q8CRU5	246	K	Diacylglycerol kinase	dagK
map00561 Glycerolipid metabolism	0.00781282	14	1.71	P0C0R4	246	K	Lipase	lip
map00195 Photosynthesis	0.429857	4	1.22	Q8CNJ7	74	K	ATP synthase subunit beta	atpD
map00195 Photosynthesis	0.429857	4	1.22	Q8CNJ7	373	K	ATP synthase subunit beta	atpD
map00195 Photosynthesis	0.429857	4	1.22	Q8CNJ7	206	K	ATP synthase subunit beta	atpD
map00195 Photosynthesis	0.429857	4	1.22	Q8CNJ7	441	K	ATP synthase subunit beta	atpD
map00195 Photosynthesis	0.429857	4	1.22	Q8CNJ4	129	K	ATP synthase subunit delta	atpH
map00195 Photosynthesis	0.429857	4	1.22	Q8CNJ3	158	K	ATP synthase subunit b	atpF
map00195 Photosynthesis	0.429857	4	1.22	Q8CNJ3	97	K	ATP synthase subunit b	atpF
map00195 Photosynthesis	0.429857	4	1.22	Q8CNJ3	68	K	ATP synthase subunit b	atpF
map00195 Photosynthesis	0.429857	4	1.22	Q8CNJ3	78	K	ATP synthase subunit b	atpF
map00195 Photosynthesis	0.429857	4	1.22	Q8CNJ5	495	K	ATP synthase subunit alpha	atpA
map00195 Photosynthesis	0.429857	4	1.22	Q8CNJ5	373	K	ATP synthase subunit alpha	atpA
map00195 Photosynthesis	0.429857	4	1.22	Q8CNJ5	486	K	ATP synthase subunit alpha	atpA
map00630 Glyoxylate and dicarboxylate metabolism	0.139174	12	1.33	A0A0H2VI31	161	K	Dihydrolipoyl dehydrogenase	SE_0794
map00630 Glyoxylate and dicarboxylate metabolism	0.139174	12	1.33	A0A0H2VI31	34	K	Dihydrolipoyl dehydrogenase	SE_0794
map00630 Glyoxylate and dicarboxylate metabolism	0.139174	12	1.33	A0A0H2VI31	379	K	Dihydrolipoyl dehydrogenase	SE_0794
map00630 Glyoxylate and dicarboxylate metabolism	0.139174	12	1.33	A0A0H2VI31	376	K	Dihydrolipoyl dehydrogenase	SE_0794
map00630 Glyoxylate and dicarboxylate metabolism	0.139174	12	1.33	A0A0H2VI31	230	K	Dihydrolipoyl dehydrogenase	SE_0794
map00630 Glyoxylate and dicarboxylate metabolism	0.139174	12	1.33	A0A0H2VI31	224	K	Dihydrolipoyl dehydrogenase	SE_0794
map00630 Glyoxylate and dicarboxylate metabolism	0.139174	12	1.33	A0A0H2VI31	111	K	Dihydrolipoyl dehydrogenase	SE_0794
map00630 Glyoxylate and dicarboxylate metabolism	0.139174	12	1.33	A0A0H2VIL4	137	K	Acetate-CoA ligase	SE_2161
map00630 Glyoxylate and dicarboxylate metabolism	0.139174	12	1.33	A0A0H2VIL4	27	K	Acetate-CoA ligase	SE_2161
map00630 Glyoxylate and dicarboxylate metabolism	0.139174	12	1.33	A0A0H2VIL4	103	K	Acetate-CoA ligase	SE_2161
map00630 Glyoxylate and dicarboxylate metabolism	0.139174	12	1.33	A0A0H2VIL4	492	K	Acetate-CoA ligase	SE_2161
map00630 Glyoxylate and dicarboxylate metabolism	0.139174	12	1.33	A0A0H2VIL4	383	K	Acetate-CoA ligase	SE_2161
map00630 Glyoxylate and dicarboxylate metabolism	0.139174	12	1.33	A0A0H2VIL4	525	K	Acetate-CoA ligase	SE_2161
map00630 Glyoxylate and dicarboxylate metabolism	0.139174	12	1.33	Q8CSR8	13	K	Glutamine synthetase	glnA
map00630 Glyoxylate and dicarboxylate metabolism	0.139174	12	1.33	Q8CSR8	226	K	Glutamine synthetase	glnA
map00630 Glyoxylate and dicarboxylate metabolism	0.139174	12	1.33	A0A0H2VEG1	393	K	Dihydrolipoyl dehydrogenase	SE_0253
map00630 Glyoxylate and dicarboxylate metabolism	0.139174	12	1.33	Q8CPW8	8	K	Glycine cleavage system H protein	gcvH
map00630 Glyoxylate and dicarboxylate metabolism	0.139174	12	1.33	A0A0H2VHZ9	188	K	Glycerate kinase	SE_1999
map00630 Glyoxylate and dicarboxylate metabolism	0.139174	12	1.33	Q8CMM1	312	K	Probable glycine dehydrogenase (decarboxylating) subunit 2	gcvPB
map00630 Glyoxylate and dicarboxylate metabolism	0.139174	12	1.33	Q8CMM1	204	K	Probable glycine dehydrogenase (decarboxylating) subunit 2	gcvPB
map00630 Glyoxylate and dicarboxylate metabolism	0.139174	12	1.33	Q8CMM1	492	K	Probable glycine dehydrogenase (decarboxylating) subunit 2	gcvPB
map00630 Glyoxylate and dicarboxylate metabolism	0.139174	12	1.33	Q8CMM1	487	K	Probable glycine dehydrogenase (decarboxylating) subunit 2	gcvPB
map00630 Glyoxylate and dicarboxylate metabolism	0.139174	12	1.33	Q8CPC2	391	K	Aconitate hydratase A	acnA
map00630 Glyoxylate and dicarboxylate metabolism	0.139174	12	1.33	Q8CPC2	6	K	Aconitate hydratase A	acnA
map00630 Glyoxylate and dicarboxylate metabolism	0.139174	12	1.33	Q8CPC2	664	K	Aconitate hydratase A	acnA
map00630 Glyoxylate and dicarboxylate metabolism	0.139174	12	1.33	Q8CPC2	416	K	Aconitate hydratase A	acnA
map00630 Glyoxylate and dicarboxylate metabolism	0.139174	12	1.33	Q8CPC2	105	K	Aconitate hydratase A	acnA
map00630 Glyoxylate and dicarboxylate metabolism	0.139174	12	1.33	Q8CPC2	82	K	Aconitate hydratase A	acnA
map00630 Glyoxylate and dicarboxylate metabolism	0.139174	12	1.33	A0A0H2VJ27	365	K	Citrate synthase	SE_1371
map00630 Glyoxylate and dicarboxylate metabolism	0.139174	12	1.33	A0A0H2VJ27	64	K	Citrate synthase	SE_1371
map00630 Glyoxylate and dicarboxylate metabolism	0.139174	12	1.33	A0A0H2VJ27	357	K	Citrate synthase	SE_1371
map00630 Glyoxylate and dicarboxylate metabolism	0.139174	12	1.33	A0A0H2VJ27	117	K	Citrate synthase	SE_1371
map00630 Glyoxylate and dicarboxylate metabolism	0.139174	12	1.33	A0A0H2VJ27	262	K	Citrate synthase	SE_1371
map00630 Glyoxylate and dicarboxylate metabolism	0.139174	12	1.33	Q8CMM0	39	K	Probable glycine dehydrogenase (decarboxylating) subunit 1	gcvPA
map00630 Glyoxylate and dicarboxylate metabolism	0.139174	12	1.33	Q8CMM0	369	K	Probable glycine dehydrogenase (decarboxylating) subunit 1	gcvPA
map00630 Glyoxylate and dicarboxylate metabolism	0.139174	12	1.33	Q8CMM0	433	K	Probable glycine dehydrogenase (decarboxylating) subunit 1	gcvPA
map00630 Glyoxylate and dicarboxylate metabolism	0.139174	12	1.33	Q8CPD0	470	K	Catalase	katA
map00630 Glyoxylate and dicarboxylate metabolism	0.139174	12	1.33	Q8CRN3	350	K	Serine hydroxymethyltransferase	glyA
map00630 Glyoxylate and dicarboxylate metabolism	0.139174	12	1.33	Q8CRN3	348	K	Serine hydroxymethyltransferase	glyA
map00630 Glyoxylate and dicarboxylate metabolism	0.139174	12	1.33	Q8CRN3	243	K	Serine hydroxymethyltransferase	glyA
map00630 Glyoxylate and dicarboxylate metabolism	0.139174	12	1.33	Q8CRN3	184	K	Serine hydroxymethyltransferase	glyA
map00480 Glutathione metabolism	0.335411	7	1.22	Q8CSR9	123	K	Glutathione peroxidase homolog BsaA	bsaA
map00480 Glutathione metabolism	0.335411	7	1.22	Q8CSR9	145	K	Glutathione peroxidase homolog BsaA	bsaA
map00480 Glutathione metabolism	0.335411	7	1.22	Q8CSR9	53	K	Glutathione peroxidase homolog BsaA	bsaA
map00480 Glutathione metabolism	0.335411	7	1.22	Q8CSR9	151	K	Glutathione peroxidase homolog BsaA	bsaA
map00480 Glutathione metabolism	0.335411	7	1.22	A0A0H2VFH6	177	K	Uncharacterized protein	SE_0693
map00480 Glutathione metabolism	0.335411	7	1.22	A0A0H2VFH6	47	K	Uncharacterized protein	SE_0693
map00480 Glutathione metabolism	0.335411	7	1.22	A0A0H2VJQ8	234	K	Dihydrolipoamide dehydrogenase	SE_2184
map00480 Glutathione metabolism	0.335411	7	1.22	A0A0H2VJQ8	218	K	Dihydrolipoamide dehydrogenase	SE_2184
map00480 Glutathione metabolism	0.335411	7	1.22	A0A0H2VE16	101	K	Regulatory protein	SE_0080
map00480 Glutathione metabolism	0.335411	7	1.22	Q8CNX4	163	K	Isocitrate dehydrogenase [NADP]	icd
map00480 Glutathione metabolism	0.335411	7	1.22	Q8CNX4	189	K	Isocitrate dehydrogenase [NADP]	icd
map00480 Glutathione metabolism	0.335411	7	1.22	Q8CNX4	225	K	Isocitrate dehydrogenase [NADP]	icd
map00480 Glutathione metabolism	0.335411	7	1.22	Q8CNX4	132	K	Isocitrate dehydrogenase [NADP]	icd
map00480 Glutathione metabolism	0.335411	7	1.22	Q8CNX4	262	K	Isocitrate dehydrogenase [NADP]	icd
map00480 Glutathione metabolism	0.335411	7	1.22	Q8CNX4	58	K	Isocitrate dehydrogenase [NADP]	icd
map00480 Glutathione metabolism	0.335411	7	1.22	Q8CP47	292	K	"6-phosphogluconate dehydrogenase, decarboxylating"	gnd
map00480 Glutathione metabolism	0.335411	7	1.22	Q8CP47	37	K	"6-phosphogluconate dehydrogenase, decarboxylating"	gnd
map00480 Glutathione metabolism	0.335411	7	1.22	Q8CP47	341	K	"6-phosphogluconate dehydrogenase, decarboxylating"	gnd
map00480 Glutathione metabolism	0.335411	7	1.22	Q8CP47	313	K	"6-phosphogluconate dehydrogenase, decarboxylating"	gnd
map00480 Glutathione metabolism	0.335411	7	1.22	A0A0H2VIQ5	152	K	Glucose-6-phosphate 1-dehydrogenase	zwf
map00480 Glutathione metabolism	0.335411	7	1.22	A0A0H2VIQ5	173	K	Glucose-6-phosphate 1-dehydrogenase	zwf
map00480 Glutathione metabolism	0.335411	7	1.22	A0A0H2VIQ5	146	K	Glucose-6-phosphate 1-dehydrogenase	zwf
map00480 Glutathione metabolism	0.335411	7	1.22	A0A0H2VIQ5	285	K	Glucose-6-phosphate 1-dehydrogenase	zwf
map00626 Naphthalene degradation	0.335102	3	1.46	A0A0H2VGU2	760	K	Aldehyde-alcohol dehydrogenase	SE_0506
map00626 Naphthalene degradation	0.335102	3	1.46	A0A0H2VGU2	703	K	Aldehyde-alcohol dehydrogenase	SE_0506
map00626 Naphthalene degradation	0.335102	3	1.46	A0A0H2VGU2	307	K	Aldehyde-alcohol dehydrogenase	SE_0506
map00626 Naphthalene degradation	0.335102	3	1.46	A0A0H2VGU2	105	K	Aldehyde-alcohol dehydrogenase	SE_0506
map00626 Naphthalene degradation	0.335102	3	1.46	A0A0H2VJ66	27	K	Uncharacterized protein	SE_1950
map00626 Naphthalene degradation	0.335102	3	1.46	A0A0H2VJ66	292	K	Uncharacterized protein	SE_1950
map00626 Naphthalene degradation	0.335102	3	1.46	A0A0H2VJ66	214	K	Uncharacterized protein	SE_1950
map00626 Naphthalene degradation	0.335102	3	1.46	Q8CQ56	8	K	Alcohol dehydrogenase	adh
map00626 Naphthalene degradation	0.335102	3	1.46	Q8CQ56	337	K	Alcohol dehydrogenase	adh
map00626 Naphthalene degradation	0.335102	3	1.46	Q8CQ56	198	K	Alcohol dehydrogenase	adh
map00626 Naphthalene degradation	0.335102	3	1.46	Q8CQ56	30	K	Alcohol dehydrogenase	adh
map00626 Naphthalene degradation	0.335102	3	1.46	Q8CQ56	307	K	Alcohol dehydrogenase	adh
map00626 Naphthalene degradation	0.335102	3	1.46	Q8CQ56	266	K	Alcohol dehydrogenase	adh
map00626 Naphthalene degradation	0.335102	3	1.46	Q8CQ56	17	K	Alcohol dehydrogenase	adh
map02060 Phosphotransferase system (PTS)	0.268621	6	1.33	Q8CNF6	101	K	PTS system lactose-specific EIIA component	lacF
map02060 Phosphotransferase system (PTS)	0.268621	6	1.33	A0A0H2VJ33	464	K	PTS system arbutin-like IIBC component	SE_1897
map02060 Phosphotransferase system (PTS)	0.268621	6	1.33	A0A0H2VJ33	117	K	PTS system arbutin-like IIBC component	SE_1897
map02060 Phosphotransferase system (PTS)	0.268621	6	1.33	Q8CT19	412	K	Phosphoenolpyruvate-protein phosphotransferase	ptsI
map02060 Phosphotransferase system (PTS)	0.268621	6	1.33	Q8CT19	342	K	Phosphoenolpyruvate-protein phosphotransferase	ptsI
map02060 Phosphotransferase system (PTS)	0.268621	6	1.33	Q8CT19	320	K	Phosphoenolpyruvate-protein phosphotransferase	ptsI
map02060 Phosphotransferase system (PTS)	0.268621	6	1.33	Q8CT19	329	K	Phosphoenolpyruvate-protein phosphotransferase	ptsI
map02060 Phosphotransferase system (PTS)	0.268621	6	1.33	Q8CP79	70	K	PTS system glucose-specific EIIA component	crr
map02060 Phosphotransferase system (PTS)	0.268621	6	1.33	Q8CP79	14	K	PTS system glucose-specific EIIA component	crr
map02060 Phosphotransferase system (PTS)	0.268621	6	1.33	Q7CCJ4	493	K	PTS system glucose-specific EIICBA component	ptsG
map02060 Phosphotransferase system (PTS)	0.268621	6	1.33	Q7CCJ4	460	K	PTS system glucose-specific EIICBA component	ptsG
map02060 Phosphotransferase system (PTS)	0.268621	6	1.33	Q8CNF7	432	K	PTS system lactose-specific EIICB component	lacE
map00072 Synthesis and degradation of ketone bodies	0.795474	1	0.81	A0A0H2VIB1	68	K	3-hydroxy-3-methylglutaryl CoA synthase	SE_2110
map01051 Biosynthesis of ansamycins	0.410345	1	2.44	Q8CPC7	283	K	Transketolase	tkt
map01051 Biosynthesis of ansamycins	0.410345	1	2.44	Q8CPC7	396	K	Transketolase	tkt
map01051 Biosynthesis of ansamycins	0.410345	1	2.44	Q8CPC7	5	K	Transketolase	tkt
map00750 Vitamin B6 metabolism	0.542823	2	1.22	Q8CTQ7	159	K	Putative pyridoxine kinase	pdxK
map00750 Vitamin B6 metabolism	0.542823	2	1.22	Q8CQV7	119	K	Pyridoxal 5'-phosphate synthase subunit PdxS	pdxS
map00750 Vitamin B6 metabolism	0.542823	2	1.22	Q8CQV7	150	K	Pyridoxal 5'-phosphate synthase subunit PdxS	pdxS
map00998 Biosynthesis of various secondary metabolites - part 2	0.410345	1	2.44	Q8CPI2	8	K	Acyl carrier protein	acpP
map00998 Biosynthesis of various secondary metabolites - part 2	0.410345	1	2.44	Q8CPI2	6	K	Acyl carrier protein	acpP
map03440 Homologous recombination	0.988099	4	0.49	Q8CPG6	560	K	DNA polymerase III PolC-type	polC
map03440 Homologous recombination	0.988099	4	0.49	Q8CPG6	611	K	DNA polymerase III PolC-type	polC
map03440 Homologous recombination	0.988099	4	0.49	A0A0H2VJ04	13	K	Single-stranded DNA-binding protein	SE_2371
map03440 Homologous recombination	0.988099	4	0.49	A0A0H2VI81	403	K	DNA polymerase I	SE_1367
map03440 Homologous recombination	0.988099	4	0.49	A0A0H2VI81	668	K	DNA polymerase I	SE_1367
map03440 Homologous recombination	0.988099	4	0.49	Q8CQK6	189	K	DNA polymerase III subunit beta	dnaN
map00910 Nitrogen metabolism	0.268621	6	1.33	A0A0H2VHY0	765	K	Nitrite reductase	SE_1978
map00910 Nitrogen metabolism	0.268621	6	1.33	A0A0H2VHY0	605	K	Nitrite reductase	SE_1978
map00910 Nitrogen metabolism	0.268621	6	1.33	A0A0H2VHY0	217	K	Nitrite reductase	SE_1978
map00910 Nitrogen metabolism	0.268621	6	1.33	A0A0H2VHY0	800	K	Nitrite reductase	SE_1978
map00910 Nitrogen metabolism	0.268621	6	1.33	A0A0H2VHY0	584	K	Nitrite reductase	SE_1978
map00910 Nitrogen metabolism	0.268621	6	1.33	Q8CTX1	25	K	Carbamate kinase 1	arcC1
map00910 Nitrogen metabolism	0.268621	6	1.33	Q8CTX1	210	K	Carbamate kinase 1	arcC1
map00910 Nitrogen metabolism	0.268621	6	1.33	Q8CTX1	262	K	Carbamate kinase 1	arcC1
map00910 Nitrogen metabolism	0.268621	6	1.33	Q8CU42	271	K	Carbamate kinase 2	arcC2
map00910 Nitrogen metabolism	0.268621	6	1.33	Q8CU42	138	K	Carbamate kinase 2	arcC2
map00910 Nitrogen metabolism	0.268621	6	1.33	Q8CU42	143	K	Carbamate kinase 2	arcC2
map00910 Nitrogen metabolism	0.268621	6	1.33	Q8CU42	308	K	Carbamate kinase 2	arcC2
map00910 Nitrogen metabolism	0.268621	6	1.33	Q8CU42	265	K	Carbamate kinase 2	arcC2
map00910 Nitrogen metabolism	0.268621	6	1.33	Q8CU42	141	K	Carbamate kinase 2	arcC2
map00910 Nitrogen metabolism	0.268621	6	1.33	Q8CU42	256	K	Carbamate kinase 2	arcC2
map00910 Nitrogen metabolism	0.268621	6	1.33	Q8CU42	255	K	Carbamate kinase 2	arcC2
map00910 Nitrogen metabolism	0.268621	6	1.33	A0A0H2VJ83	70	K	Nitrate reductase beta chain narH	SE_1974
map00910 Nitrogen metabolism	0.268621	6	1.33	A0A0H2VJ83	290	K	Nitrate reductase beta chain narH	SE_1974
map00910 Nitrogen metabolism	0.268621	6	1.33	Q8CSR8	13	K	Glutamine synthetase	glnA
map00910 Nitrogen metabolism	0.268621	6	1.33	Q8CSR8	226	K	Glutamine synthetase	glnA
map00910 Nitrogen metabolism	0.268621	6	1.33	A0A0H2VHP1	1070	K	Respiratory nitrate reductase alpha chain	SE_1975
map00910 Nitrogen metabolism	0.268621	6	1.33	A0A0H2VHP1	10	K	Respiratory nitrate reductase alpha chain	SE_1975
map00910 Nitrogen metabolism	0.268621	6	1.33	A0A0H2VHP1	107	K	Respiratory nitrate reductase alpha chain	SE_1975
map00920 Sulfur metabolism	0.984032	2	0.41	Q8CMT6	64	K	Cysteine synthase	cysK
map00920 Sulfur metabolism	0.984032	2	0.41	Q8CMX5	283	K	Sulfite reductase [NADPH] hemoprotein beta-component	cysI
map05152 Tuberculosis	0.366809	2	1.62	P0C0N7	360	K	60 kDa chaperonin	groL
map05152 Tuberculosis	0.366809	2	1.62	P0C0N7	388	K	60 kDa chaperonin	groL
map05152 Tuberculosis	0.366809	2	1.62	P0C0N7	140	K	60 kDa chaperonin	groL
map05152 Tuberculosis	0.366809	2	1.62	Q8CP17	274	K	Chaperone protein DnaK	dnaK
map05152 Tuberculosis	0.366809	2	1.62	Q8CP17	233	K	Chaperone protein DnaK	dnaK
map05152 Tuberculosis	0.366809	2	1.62	Q8CP17	497	K	Chaperone protein DnaK	dnaK
map05152 Tuberculosis	0.366809	2	1.62	Q8CP17	129	K	Chaperone protein DnaK	dnaK
map05152 Tuberculosis	0.366809	2	1.62	Q8CP17	68	K	Chaperone protein DnaK	dnaK
map05152 Tuberculosis	0.366809	2	1.62	Q8CP17	324	K	Chaperone protein DnaK	dnaK
map05152 Tuberculosis	0.366809	2	1.62	Q8CP17	532	K	Chaperone protein DnaK	dnaK
map05152 Tuberculosis	0.366809	2	1.62	Q8CP17	487	K	Chaperone protein DnaK	dnaK
map05152 Tuberculosis	0.366809	2	1.62	Q8CP17	329	K	Chaperone protein DnaK	dnaK
map05152 Tuberculosis	0.366809	2	1.62	Q8CP17	76	K	Chaperone protein DnaK	dnaK
map05152 Tuberculosis	0.366809	2	1.62	Q8CP17	157	K	Chaperone protein DnaK	dnaK
map05152 Tuberculosis	0.366809	2	1.62	Q8CP17	284	K	Chaperone protein DnaK	dnaK
map05152 Tuberculosis	0.366809	2	1.62	Q8CP17	54	K	Chaperone protein DnaK	dnaK
map01501 beta-Lactam resistance	0.808122	5	0.81	A0A0H2VGK1	563	K	ATP-binding cassette transporter A	SE_0418
map01501 beta-Lactam resistance	0.808122	5	0.81	A0A0H2VGK1	226	K	ATP-binding cassette transporter A	SE_0418
map01501 beta-Lactam resistance	0.808122	5	0.81	P0A041	38	K	Penicillinase repressor	blaI
map01501 beta-Lactam resistance	0.808122	5	0.81	A0A0H2VFT7	575	K	Penicillin-binding protein 1	SE_0856
map01501 beta-Lactam resistance	0.808122	5	0.81	A0A0H2VGN1	231	K	Penicillin-binding protein 3	SE_1238
map01501 beta-Lactam resistance	0.808122	5	0.81	A0A0H2VGG2	166	K	Penicillin-binding protein	SE_1138
map01501 beta-Lactam resistance	0.808122	5	0.81	A0A0H2VGG2	98	K	Penicillin-binding protein	SE_1138
map01501 beta-Lactam resistance	0.808122	5	0.81	A0A0H2VGG2	125	K	Penicillin-binding protein	SE_1138
map01501 beta-Lactam resistance	0.808122	5	0.81	A0A0H2VGG2	264	K	Penicillin-binding protein	SE_1138
map00524 Neomycin, kanamycin and gentamicin biosynthesis	0.410345	1	2.44	A0A0H2VIT7	22	K	Glucokinase	SE_1233
map03430 Mismatch repair	0.587787	7	1	Q8CP38	289	K	Exodeoxyribonuclease 7 large subunit	xseA
map03430 Mismatch repair	0.587787	7	1	Q8CP38	37	K	Exodeoxyribonuclease 7 large subunit	xseA
map03430 Mismatch repair	0.587787	7	1	Q8CPF0	182	K	DNA mismatch repair protein MutS	mutS
map03430 Mismatch repair	0.587787	7	1	Q8CPL6	298	K	Endonuclease MutS2	mutS2
map03430 Mismatch repair	0.587787	7	1	Q8CPL6	614	K	Endonuclease MutS2	mutS2
map03430 Mismatch repair	0.587787	7	1	Q8CPG6	560	K	DNA polymerase III PolC-type	polC
map03430 Mismatch repair	0.587787	7	1	Q8CPG6	611	K	DNA polymerase III PolC-type	polC
map03430 Mismatch repair	0.587787	7	1	A0A0H2VJ04	13	K	Single-stranded DNA-binding protein	SE_2371
map03430 Mismatch repair	0.587787	7	1	Q8CQK6	189	K	DNA polymerase III subunit beta	dnaN
map03430 Mismatch repair	0.587787	7	1	Q8CPE9	134	K	DNA mismatch repair protein MutL	mutL
map03430 Mismatch repair	0.587787	7	1	Q8CPE9	489	K	DNA mismatch repair protein MutL	mutL
map00900 Terpenoid backbone biosynthesis	0.998325	1	0.2	A0A0H2VIB1	68	K	3-hydroxy-3-methylglutaryl CoA synthase	SE_2110
map00640 Propanoate metabolism	0.00530325	17	1.66	A0A0H2VI31	161	K	Dihydrolipoyl dehydrogenase	SE_0794
map00640 Propanoate metabolism	0.00530325	17	1.66	A0A0H2VI31	34	K	Dihydrolipoyl dehydrogenase	SE_0794
map00640 Propanoate metabolism	0.00530325	17	1.66	A0A0H2VI31	379	K	Dihydrolipoyl dehydrogenase	SE_0794
map00640 Propanoate metabolism	0.00530325	17	1.66	A0A0H2VI31	376	K	Dihydrolipoyl dehydrogenase	SE_0794
map00640 Propanoate metabolism	0.00530325	17	1.66	A0A0H2VI31	230	K	Dihydrolipoyl dehydrogenase	SE_0794
map00640 Propanoate metabolism	0.00530325	17	1.66	A0A0H2VI31	224	K	Dihydrolipoyl dehydrogenase	SE_0794
map00640 Propanoate metabolism	0.00530325	17	1.66	A0A0H2VI31	111	K	Dihydrolipoyl dehydrogenase	SE_0794
map00640 Propanoate metabolism	0.00530325	17	1.66	A0A0H2VIL4	137	K	Acetate-CoA ligase	SE_2161
map00640 Propanoate metabolism	0.00530325	17	1.66	A0A0H2VIL4	27	K	Acetate-CoA ligase	SE_2161
map00640 Propanoate metabolism	0.00530325	17	1.66	A0A0H2VIL4	103	K	Acetate-CoA ligase	SE_2161
map00640 Propanoate metabolism	0.00530325	17	1.66	A0A0H2VIL4	492	K	Acetate-CoA ligase	SE_2161
map00640 Propanoate metabolism	0.00530325	17	1.66	A0A0H2VIL4	383	K	Acetate-CoA ligase	SE_2161
map00640 Propanoate metabolism	0.00530325	17	1.66	A0A0H2VIL4	525	K	Acetate-CoA ligase	SE_2161
map00640 Propanoate metabolism	0.00530325	17	1.66	A0A0H2VEG1	393	K	Dihydrolipoyl dehydrogenase	SE_0253
map00640 Propanoate metabolism	0.00530325	17	1.66	A0A0H2VGD2	174	K	Dihydrolipoamide acetyltransferase component of pyruvate dehydrogenase complex	SE_1196
map00640 Propanoate metabolism	0.00530325	17	1.66	Q8CS66	188	K	Acetyl-coenzyme A carboxylase carboxyl transferase subunit beta	accD
map00640 Propanoate metabolism	0.00530325	17	1.66	A0A0H2VGL1	34	K	Acetyl-CoA carboxylase biotin carboxyl carrier subunit	SE_1208
map00640 Propanoate metabolism	0.00530325	17	1.66	Q8CQ62	210	K	Phosphate acetyltransferase	pta
map00640 Propanoate metabolism	0.00530325	17	1.66	Q8CPH4	243	K	Succinate--CoA ligase [ADP-forming] subunit alpha	sucD
map00640 Propanoate metabolism	0.00530325	17	1.66	Q8CPH4	145	K	Succinate--CoA ligase [ADP-forming] subunit alpha	sucD
map00640 Propanoate metabolism	0.00530325	17	1.66	Q8CPH4	144	K	Succinate--CoA ligase [ADP-forming] subunit alpha	sucD
map00640 Propanoate metabolism	0.00530325	17	1.66	Q8CPH4	7	K	Succinate--CoA ligase [ADP-forming] subunit alpha	sucD
map00640 Propanoate metabolism	0.00530325	17	1.66	Q8CPH4	301	K	Succinate--CoA ligase [ADP-forming] subunit alpha	sucD
map00640 Propanoate metabolism	0.00530325	17	1.66	A0A0H2VGB8	267	K	Branched-chain alpha-keto acid dehydrogenase E1	SE_1198
map00640 Propanoate metabolism	0.00530325	17	1.66	A0A0H2VGB8	15	K	Branched-chain alpha-keto acid dehydrogenase E1	SE_1198
map00640 Propanoate metabolism	0.00530325	17	1.66	A0A0H2VGC2	174	K	Acetyl-CoA carboxylase (Biotin carboxylase subunit) accC	SE_1207
map00640 Propanoate metabolism	0.00530325	17	1.66	Q8CPH5	61	K	Succinate--CoA ligase [ADP-forming] subunit beta	sucC
map00640 Propanoate metabolism	0.00530325	17	1.66	Q8CPH5	227	K	Succinate--CoA ligase [ADP-forming] subunit beta	sucC
map00640 Propanoate metabolism	0.00530325	17	1.66	Q8CPH5	146	K	Succinate--CoA ligase [ADP-forming] subunit beta	sucC
map00640 Propanoate metabolism	0.00530325	17	1.66	Q8CPH5	297	K	Succinate--CoA ligase [ADP-forming] subunit beta	sucC
map00640 Propanoate metabolism	0.00530325	17	1.66	Q8CPH5	176	K	Succinate--CoA ligase [ADP-forming] subunit beta	sucC
map00640 Propanoate metabolism	0.00530325	17	1.66	Q8CS67	6	K	Acetyl-coenzyme A carboxylase carboxyl transferase subunit alpha	accA
map00640 Propanoate metabolism	0.00530325	17	1.66	Q8CS67	14	K	Acetyl-coenzyme A carboxylase carboxyl transferase subunit alpha	accA
map00640 Propanoate metabolism	0.00530325	17	1.66	Q8CTX6	384	K	Formate acetyltransferase	pflB
map00640 Propanoate metabolism	0.00530325	17	1.66	Q8CTX6	161	K	Formate acetyltransferase	pflB
map00640 Propanoate metabolism	0.00530325	17	1.66	Q8CTX6	142	K	Formate acetyltransferase	pflB
map00640 Propanoate metabolism	0.00530325	17	1.66	Q8CTX6	618	K	Formate acetyltransferase	pflB
map00640 Propanoate metabolism	0.00530325	17	1.66	Q8CTX6	198	K	Formate acetyltransferase	pflB
map00640 Propanoate metabolism	0.00530325	17	1.66	Q8CTX6	91	K	Formate acetyltransferase	pflB
map00640 Propanoate metabolism	0.00530325	17	1.66	Q8CTX6	670	K	Formate acetyltransferase	pflB
map00640 Propanoate metabolism	0.00530325	17	1.66	Q8CTX6	103	K	Formate acetyltransferase	pflB
map00640 Propanoate metabolism	0.00530325	17	1.66	Q8CTX6	106	K	Formate acetyltransferase	pflB
map00640 Propanoate metabolism	0.00530325	17	1.66	Q8CTX6	379	K	Formate acetyltransferase	pflB
map00640 Propanoate metabolism	0.00530325	17	1.66	Q8CTX6	229	K	Formate acetyltransferase	pflB
map00640 Propanoate metabolism	0.00530325	17	1.66	Q8CTX6	539	K	Formate acetyltransferase	pflB
map00640 Propanoate metabolism	0.00530325	17	1.66	Q8CTX6	609	K	Formate acetyltransferase	pflB
map00640 Propanoate metabolism	0.00530325	17	1.66	A0A0H2VJK1	8	K	Sorbitol dehydrogenase-like protein	SE_2098
map00640 Propanoate metabolism	0.00530325	17	1.66	A0A0H2VJK1	46	K	Sorbitol dehydrogenase-like protein	SE_2098
map00640 Propanoate metabolism	0.00530325	17	1.66	A0A0H2VJK1	338	K	Sorbitol dehydrogenase-like protein	SE_2098
map00640 Propanoate metabolism	0.00530325	17	1.66	A0A0H2VJK1	230	K	Sorbitol dehydrogenase-like protein	SE_2098
map00640 Propanoate metabolism	0.00530325	17	1.66	A0A0H2VJK1	227	K	Sorbitol dehydrogenase-like protein	SE_2098
map00640 Propanoate metabolism	0.00530325	17	1.66	A0A0H2VJK1	19	K	Sorbitol dehydrogenase-like protein	SE_2098
map00640 Propanoate metabolism	0.00530325	17	1.66	Q8CMZ0	42	K	L-lactate dehydrogenase	ldh
map00640 Propanoate metabolism	0.00530325	17	1.66	Q8CMZ0	72	K	L-lactate dehydrogenase	ldh
map00640 Propanoate metabolism	0.00530325	17	1.66	Q8CMZ0	97	K	L-lactate dehydrogenase	ldh
map00640 Propanoate metabolism	0.00530325	17	1.66	Q8CMZ0	86	K	L-lactate dehydrogenase	ldh
map00640 Propanoate metabolism	0.00530325	17	1.66	Q8CMZ0	133	K	L-lactate dehydrogenase	ldh
map00640 Propanoate metabolism	0.00530325	17	1.66	Q8CMZ0	300	K	L-lactate dehydrogenase	ldh
map00640 Propanoate metabolism	0.00530325	17	1.66	A0A0H2VH40	85	K	Glycerol dehydrogenase	SE_0235
map00640 Propanoate metabolism	0.00530325	17	1.66	A0A0H2VH40	3	K	Glycerol dehydrogenase	SE_0235
map00640 Propanoate metabolism	0.00530325	17	1.66	A0A0H2VH40	196	K	Glycerol dehydrogenase	SE_0235
map00640 Propanoate metabolism	0.00530325	17	1.66	Q8CS60	357	K	Acetate kinase	ackA
map00640 Propanoate metabolism	0.00530325	17	1.66	Q8CS60	175	K	Acetate kinase	ackA
map00640 Propanoate metabolism	0.00530325	17	1.66	Q8CS60	79	K	Acetate kinase	ackA
map00550 Peptidoglycan biosynthesis	0.618398	10	0.97	A0A0H2VFT7	575	K	Penicillin-binding protein 1	SE_0856
map00550 Peptidoglycan biosynthesis	0.618398	10	0.97	Q8CRP5	134	K	D-alanine--D-alanine ligase	ddl
map00550 Peptidoglycan biosynthesis	0.618398	10	0.97	Q8CRP5	157	K	D-alanine--D-alanine ligase	ddl
map00550 Peptidoglycan biosynthesis	0.618398	10	0.97	Q8CMM3	93	K	UDP-N-acetylglucosamine--N-acetylmuramyl-(pentapeptide) pyrophosphoryl-undecaprenol N-acetylglucosamine transferase	murG
map00550 Peptidoglycan biosynthesis	0.618398	10	0.97	Q8CMM3	234	K	UDP-N-acetylglucosamine--N-acetylmuramyl-(pentapeptide) pyrophosphoryl-undecaprenol N-acetylglucosamine transferase	murG
map00550 Peptidoglycan biosynthesis	0.618398	10	0.97	Q8CPZ7	26	K	UDP-N-acetylenolpyruvoylglucosamine reductase	murB
map00550 Peptidoglycan biosynthesis	0.618398	10	0.97	A0A0H2VHF8	46	K	UDP-N-acetylmuramoyl-tripeptide--D-alanyl-D-alanine ligase	murF
map00550 Peptidoglycan biosynthesis	0.618398	10	0.97	A0A0H2VHF8	208	K	UDP-N-acetylmuramoyl-tripeptide--D-alanyl-D-alanine ligase	murF
map00550 Peptidoglycan biosynthesis	0.618398	10	0.97	Q8CPA8	172	K	Aminoacyltransferase FemB	femB
map00550 Peptidoglycan biosynthesis	0.618398	10	0.97	Q8CPA8	95	K	Aminoacyltransferase FemB	femB
map00550 Peptidoglycan biosynthesis	0.618398	10	0.97	Q8CPA8	290	K	Aminoacyltransferase FemB	femB
map00550 Peptidoglycan biosynthesis	0.618398	10	0.97	A0A0H2VGN1	231	K	Penicillin-binding protein 3	SE_1238
map00550 Peptidoglycan biosynthesis	0.618398	10	0.97	A0A0H2VGG2	166	K	Penicillin-binding protein	SE_1138
map00550 Peptidoglycan biosynthesis	0.618398	10	0.97	A0A0H2VGG2	98	K	Penicillin-binding protein	SE_1138
map00550 Peptidoglycan biosynthesis	0.618398	10	0.97	A0A0H2VGG2	125	K	Penicillin-binding protein	SE_1138
map00550 Peptidoglycan biosynthesis	0.618398	10	0.97	A0A0H2VGG2	264	K	Penicillin-binding protein	SE_1138
map00550 Peptidoglycan biosynthesis	0.618398	10	0.97	Q8CRM7	335	K	UDP-N-acetylglucosamine 1-carboxyvinyltransferase 2	murA2
map00550 Peptidoglycan biosynthesis	0.618398	10	0.97	Q8CRM7	15	K	UDP-N-acetylglucosamine 1-carboxyvinyltransferase 2	murA2
map00550 Peptidoglycan biosynthesis	0.618398	10	0.97	Q8CPA9	268	K	Aminoacyltransferase FemA	femA
map01502 Vancomycin resistance	0.602988	3	1.04	A0A0H2VHF8	46	K	UDP-N-acetylmuramoyl-tripeptide--D-alanyl-D-alanine ligase	murF
map01502 Vancomycin resistance	0.602988	3	1.04	A0A0H2VHF8	208	K	UDP-N-acetylmuramoyl-tripeptide--D-alanyl-D-alanine ligase	murF
map01502 Vancomycin resistance	0.602988	3	1.04	Q8CRP5	134	K	D-alanine--D-alanine ligase	ddl
map01502 Vancomycin resistance	0.602988	3	1.04	Q8CRP5	157	K	D-alanine--D-alanine ligase	ddl
map01502 Vancomycin resistance	0.602988	3	1.04	Q8CMM3	93	K	UDP-N-acetylglucosamine--N-acetylmuramyl-(pentapeptide) pyrophosphoryl-undecaprenol N-acetylglucosamine transferase	murG
map01502 Vancomycin resistance	0.602988	3	1.04	Q8CMM3	234	K	UDP-N-acetylglucosamine--N-acetylmuramyl-(pentapeptide) pyrophosphoryl-undecaprenol N-acetylglucosamine transferase	murG
map00010 Glycolysis / Gluconeogenesis	4.71075e-08	33	2.01	Q8CTD5	217	K	Triosephosphate isomerase	tpiA
map00010 Glycolysis / Gluconeogenesis	4.71075e-08	33	2.01	Q8CTD5	151	K	Triosephosphate isomerase	tpiA
map00010 Glycolysis / Gluconeogenesis	4.71075e-08	33	2.01	Q8CTD5	150	K	Triosephosphate isomerase	tpiA
map00010 Glycolysis / Gluconeogenesis	4.71075e-08	33	2.01	Q8CTD5	113	K	Triosephosphate isomerase	tpiA
map00010 Glycolysis / Gluconeogenesis	4.71075e-08	33	2.01	Q8CN27	292	K	"Fructose-1,6-bisphosphatase class 3"	fbp
map00010 Glycolysis / Gluconeogenesis	4.71075e-08	33	2.01	A0A0H2VEG1	393	K	Dihydrolipoyl dehydrogenase	SE_0253
map00010 Glycolysis / Gluconeogenesis	4.71075e-08	33	2.01	Q7CCJ4	493	K	PTS system glucose-specific EIICBA component	ptsG
map00010 Glycolysis / Gluconeogenesis	4.71075e-08	33	2.01	Q7CCJ4	460	K	PTS system glucose-specific EIICBA component	ptsG
map00010 Glycolysis / Gluconeogenesis	4.71075e-08	33	2.01	Q8CTD6	27	K	Phosphoglycerate kinase	pgk
map00010 Glycolysis / Gluconeogenesis	4.71075e-08	33	2.01	Q8CTD6	272	K	Phosphoglycerate kinase	pgk
map00010 Glycolysis / Gluconeogenesis	4.71075e-08	33	2.01	Q8CTD6	130	K	Phosphoglycerate kinase	pgk
map00010 Glycolysis / Gluconeogenesis	4.71075e-08	33	2.01	Q8CTD6	206	K	Phosphoglycerate kinase	pgk
map00010 Glycolysis / Gluconeogenesis	4.71075e-08	33	2.01	Q8CTD6	75	K	Phosphoglycerate kinase	pgk
map00010 Glycolysis / Gluconeogenesis	4.71075e-08	33	2.01	Q8CTD6	4	K	Phosphoglycerate kinase	pgk
map00010 Glycolysis / Gluconeogenesis	4.71075e-08	33	2.01	Q8CTD6	99	K	Phosphoglycerate kinase	pgk
map00010 Glycolysis / Gluconeogenesis	4.71075e-08	33	2.01	Q8CTD6	126	K	Phosphoglycerate kinase	pgk
map00010 Glycolysis / Gluconeogenesis	4.71075e-08	33	2.01	Q8CS68	212	K	ATP-dependent 6-phosphofructokinase	pfkA
map00010 Glycolysis / Gluconeogenesis	4.71075e-08	33	2.01	Q8CS68	77	K	ATP-dependent 6-phosphofructokinase	pfkA
map00010 Glycolysis / Gluconeogenesis	4.71075e-08	33	2.01	A0A0H2VEM3	152	K	Dihydrolipoamide acetyltransferase component of pyruvate dehydrogenase complex	SE_0256
map00010 Glycolysis / Gluconeogenesis	4.71075e-08	33	2.01	A0A0H2VEM3	103	K	Dihydrolipoamide acetyltransferase component of pyruvate dehydrogenase complex	SE_0256
map00010 Glycolysis / Gluconeogenesis	4.71075e-08	33	2.01	A0A0H2VEM3	96	K	Dihydrolipoamide acetyltransferase component of pyruvate dehydrogenase complex	SE_0256
map00010 Glycolysis / Gluconeogenesis	4.71075e-08	33	2.01	A0A0H2VGU2	760	K	Aldehyde-alcohol dehydrogenase	SE_0506
map00010 Glycolysis / Gluconeogenesis	4.71075e-08	33	2.01	A0A0H2VGU2	703	K	Aldehyde-alcohol dehydrogenase	SE_0506
map00010 Glycolysis / Gluconeogenesis	4.71075e-08	33	2.01	A0A0H2VGU2	307	K	Aldehyde-alcohol dehydrogenase	SE_0506
map00010 Glycolysis / Gluconeogenesis	4.71075e-08	33	2.01	A0A0H2VGU2	105	K	Aldehyde-alcohol dehydrogenase	SE_0506
map00010 Glycolysis / Gluconeogenesis	4.71075e-08	33	2.01	Q8CNI5	292	K	Putative aldehyde dehydrogenase SE_1720	SE_1720
map00010 Glycolysis / Gluconeogenesis	4.71075e-08	33	2.01	Q8CNI5	351	K	Putative aldehyde dehydrogenase SE_1720	SE_1720
map00010 Glycolysis / Gluconeogenesis	4.71075e-08	33	2.01	Q8CNI5	270	K	Putative aldehyde dehydrogenase SE_1720	SE_1720
map00010 Glycolysis / Gluconeogenesis	4.71075e-08	33	2.01	A0A0H2VFY4	405	K	Putative 2-oxoacid ferredoxin oxidoreductase alpha subunit	SE_0967
map00010 Glycolysis / Gluconeogenesis	4.71075e-08	33	2.01	Q8CT13	274	K	Dihydrolipoyllysine-residue acetyltransferase component of pyruvate dehydrogenase complex	pdhC
map00010 Glycolysis / Gluconeogenesis	4.71075e-08	33	2.01	Q8CT13	382	K	Dihydrolipoyllysine-residue acetyltransferase component of pyruvate dehydrogenase complex	pdhC
map00010 Glycolysis / Gluconeogenesis	4.71075e-08	33	2.01	Q8CT13	338	K	Dihydrolipoyllysine-residue acetyltransferase component of pyruvate dehydrogenase complex	pdhC
map00010 Glycolysis / Gluconeogenesis	4.71075e-08	33	2.01	Q8CT13	273	K	Dihydrolipoyllysine-residue acetyltransferase component of pyruvate dehydrogenase complex	pdhC
map00010 Glycolysis / Gluconeogenesis	4.71075e-08	33	2.01	Q8CT13	248	K	Dihydrolipoyllysine-residue acetyltransferase component of pyruvate dehydrogenase complex	pdhC
map00010 Glycolysis / Gluconeogenesis	4.71075e-08	33	2.01	Q8CT13	97	K	Dihydrolipoyllysine-residue acetyltransferase component of pyruvate dehydrogenase complex	pdhC
map00010 Glycolysis / Gluconeogenesis	4.71075e-08	33	2.01	Q8CT13	420	K	Dihydrolipoyllysine-residue acetyltransferase component of pyruvate dehydrogenase complex	pdhC
map00010 Glycolysis / Gluconeogenesis	4.71075e-08	33	2.01	Q8CPY3	406	K	Enolase	eno
map00010 Glycolysis / Gluconeogenesis	4.71075e-08	33	2.01	Q8CPY3	268	K	Enolase	eno
map00010 Glycolysis / Gluconeogenesis	4.71075e-08	33	2.01	Q8CPN3	315	K	Pyruvate dehydrogenase E1 component subunit alpha	pdhA
map00010 Glycolysis / Gluconeogenesis	4.71075e-08	33	2.01	Q8CPN3	214	K	Pyruvate dehydrogenase E1 component subunit alpha	pdhA
map00010 Glycolysis / Gluconeogenesis	4.71075e-08	33	2.01	Q8CPY4	170	K	"2,3-bisphosphoglycerate-independent phosphoglycerate mutase"	gpmI
map00010 Glycolysis / Gluconeogenesis	4.71075e-08	33	2.01	Q8CPY4	330	K	"2,3-bisphosphoglycerate-independent phosphoglycerate mutase"	gpmI
map00010 Glycolysis / Gluconeogenesis	4.71075e-08	33	2.01	Q8CPY4	3	K	"2,3-bisphosphoglycerate-independent phosphoglycerate mutase"	gpmI
map00010 Glycolysis / Gluconeogenesis	4.71075e-08	33	2.01	Q8CPY4	30	K	"2,3-bisphosphoglycerate-independent phosphoglycerate mutase"	gpmI
map00010 Glycolysis / Gluconeogenesis	4.71075e-08	33	2.01	Q8CPY4	504	K	"2,3-bisphosphoglycerate-independent phosphoglycerate mutase"	gpmI
map00010 Glycolysis / Gluconeogenesis	4.71075e-08	33	2.01	A0A0H2VI31	161	K	Dihydrolipoyl dehydrogenase	SE_0794
map00010 Glycolysis / Gluconeogenesis	4.71075e-08	33	2.01	A0A0H2VI31	34	K	Dihydrolipoyl dehydrogenase	SE_0794
map00010 Glycolysis / Gluconeogenesis	4.71075e-08	33	2.01	A0A0H2VI31	379	K	Dihydrolipoyl dehydrogenase	SE_0794
map00010 Glycolysis / Gluconeogenesis	4.71075e-08	33	2.01	A0A0H2VI31	376	K	Dihydrolipoyl dehydrogenase	SE_0794
map00010 Glycolysis / Gluconeogenesis	4.71075e-08	33	2.01	A0A0H2VI31	230	K	Dihydrolipoyl dehydrogenase	SE_0794
map00010 Glycolysis / Gluconeogenesis	4.71075e-08	33	2.01	A0A0H2VI31	224	K	Dihydrolipoyl dehydrogenase	SE_0794
map00010 Glycolysis / Gluconeogenesis	4.71075e-08	33	2.01	A0A0H2VI31	111	K	Dihydrolipoyl dehydrogenase	SE_0794
map00010 Glycolysis / Gluconeogenesis	4.71075e-08	33	2.01	Q8CN38	413	K	Phosphoglucomutase	pgcA
map00010 Glycolysis / Gluconeogenesis	4.71075e-08	33	2.01	Q8CN38	44	K	Phosphoglucomutase	pgcA
map00010 Glycolysis / Gluconeogenesis	4.71075e-08	33	2.01	A0A0H2VIL4	137	K	Acetate-CoA ligase	SE_2161
map00010 Glycolysis / Gluconeogenesis	4.71075e-08	33	2.01	A0A0H2VIL4	27	K	Acetate-CoA ligase	SE_2161
map00010 Glycolysis / Gluconeogenesis	4.71075e-08	33	2.01	A0A0H2VIL4	103	K	Acetate-CoA ligase	SE_2161
map00010 Glycolysis / Gluconeogenesis	4.71075e-08	33	2.01	A0A0H2VIL4	492	K	Acetate-CoA ligase	SE_2161
map00010 Glycolysis / Gluconeogenesis	4.71075e-08	33	2.01	A0A0H2VIL4	383	K	Acetate-CoA ligase	SE_2161
map00010 Glycolysis / Gluconeogenesis	4.71075e-08	33	2.01	A0A0H2VIL4	525	K	Acetate-CoA ligase	SE_2161
map00010 Glycolysis / Gluconeogenesis	4.71075e-08	33	2.01	Q8CPY5	124	K	Glyceraldehyde-3-phosphate dehydrogenase 1	gapA1
map00010 Glycolysis / Gluconeogenesis	4.71075e-08	33	2.01	Q8CPY5	116	K	Glyceraldehyde-3-phosphate dehydrogenase 1	gapA1
map00010 Glycolysis / Gluconeogenesis	4.71075e-08	33	2.01	Q8CPY5	219	K	Glyceraldehyde-3-phosphate dehydrogenase 1	gapA1
map00010 Glycolysis / Gluconeogenesis	4.71075e-08	33	2.01	Q8CPY5	115	K	Glyceraldehyde-3-phosphate dehydrogenase 1	gapA1
map00010 Glycolysis / Gluconeogenesis	4.71075e-08	33	2.01	Q8CNI3	269	K	Fructose-bisphosphate aldolase	fba
map00010 Glycolysis / Gluconeogenesis	4.71075e-08	33	2.01	Q8CNI3	252	K	Fructose-bisphosphate aldolase	fba
map00010 Glycolysis / Gluconeogenesis	4.71075e-08	33	2.01	Q8CNI3	259	K	Fructose-bisphosphate aldolase	fba
map00010 Glycolysis / Gluconeogenesis	4.71075e-08	33	2.01	Q8CNI3	185	K	Fructose-bisphosphate aldolase	fba
map00010 Glycolysis / Gluconeogenesis	4.71075e-08	33	2.01	Q8CNI3	7	K	Fructose-bisphosphate aldolase	fba
map00010 Glycolysis / Gluconeogenesis	4.71075e-08	33	2.01	Q8CMY5	104	K	Fructose-bisphosphate aldolase class 1	fda
map00010 Glycolysis / Gluconeogenesis	4.71075e-08	33	2.01	Q8CMY5	251	K	Fructose-bisphosphate aldolase class 1	fda
map00010 Glycolysis / Gluconeogenesis	4.71075e-08	33	2.01	Q8CMY5	190	K	Fructose-bisphosphate aldolase class 1	fda
map00010 Glycolysis / Gluconeogenesis	4.71075e-08	33	2.01	Q8CMY5	185	K	Fructose-bisphosphate aldolase class 1	fda
map00010 Glycolysis / Gluconeogenesis	4.71075e-08	33	2.01	Q8CMY5	3	K	Fructose-bisphosphate aldolase class 1	fda
map00010 Glycolysis / Gluconeogenesis	4.71075e-08	33	2.01	Q8CMY5	138	K	Fructose-bisphosphate aldolase class 1	fda
map00010 Glycolysis / Gluconeogenesis	4.71075e-08	33	2.01	Q8CMY5	295	K	Fructose-bisphosphate aldolase class 1	fda
map00010 Glycolysis / Gluconeogenesis	4.71075e-08	33	2.01	Q8CMY5	8	K	Fructose-bisphosphate aldolase class 1	fda
map00010 Glycolysis / Gluconeogenesis	4.71075e-08	33	2.01	Q8CMY5	101	K	Fructose-bisphosphate aldolase class 1	fda
map00010 Glycolysis / Gluconeogenesis	4.71075e-08	33	2.01	Q8CMY5	117	K	Fructose-bisphosphate aldolase class 1	fda
map00010 Glycolysis / Gluconeogenesis	4.71075e-08	33	2.01	Q8CMY5	223	K	Fructose-bisphosphate aldolase class 1	fda
map00010 Glycolysis / Gluconeogenesis	4.71075e-08	33	2.01	A0A0H2VJG4	257	K	Aldehyde dehydrogenase	SE_1603
map00010 Glycolysis / Gluconeogenesis	4.71075e-08	33	2.01	A0A0H2VJ66	27	K	Uncharacterized protein	SE_1950
map00010 Glycolysis / Gluconeogenesis	4.71075e-08	33	2.01	A0A0H2VJ66	292	K	Uncharacterized protein	SE_1950
map00010 Glycolysis / Gluconeogenesis	4.71075e-08	33	2.01	A0A0H2VJ66	214	K	Uncharacterized protein	SE_1950
map00010 Glycolysis / Gluconeogenesis	4.71075e-08	33	2.01	Q8CS69	563	K	Pyruvate kinase	pyk
map00010 Glycolysis / Gluconeogenesis	4.71075e-08	33	2.01	Q8CS69	173	K	Pyruvate kinase	pyk
map00010 Glycolysis / Gluconeogenesis	4.71075e-08	33	2.01	Q8CS69	156	K	Pyruvate kinase	pyk
map00010 Glycolysis / Gluconeogenesis	4.71075e-08	33	2.01	Q8CS69	390	K	Pyruvate kinase	pyk
map00010 Glycolysis / Gluconeogenesis	4.71075e-08	33	2.01	Q8CS69	139	K	Pyruvate kinase	pyk
map00010 Glycolysis / Gluconeogenesis	4.71075e-08	33	2.01	Q8CS69	341	K	Pyruvate kinase	pyk
map00010 Glycolysis / Gluconeogenesis	4.71075e-08	33	2.01	A0A0H2VIT7	22	K	Glucokinase	SE_1233
map00010 Glycolysis / Gluconeogenesis	4.71075e-08	33	2.01	Q8CN61	98	K	"2,3-bisphosphoglycerate-dependent phosphoglycerate mutase"	gpmA
map00010 Glycolysis / Gluconeogenesis	4.71075e-08	33	2.01	Q8CT80	163	K	Glucose-6-phosphate isomerase	pgi
map00010 Glycolysis / Gluconeogenesis	4.71075e-08	33	2.01	Q8CT80	67	K	Glucose-6-phosphate isomerase	pgi
map00010 Glycolysis / Gluconeogenesis	4.71075e-08	33	2.01	Q8CT80	330	K	Glucose-6-phosphate isomerase	pgi
map00010 Glycolysis / Gluconeogenesis	4.71075e-08	33	2.01	Q8CT80	289	K	Glucose-6-phosphate isomerase	pgi
map00010 Glycolysis / Gluconeogenesis	4.71075e-08	33	2.01	Q8CT80	24	K	Glucose-6-phosphate isomerase	pgi
map00010 Glycolysis / Gluconeogenesis	4.71075e-08	33	2.01	Q8CT80	17	K	Glucose-6-phosphate isomerase	pgi
map00010 Glycolysis / Gluconeogenesis	4.71075e-08	33	2.01	Q8CQ56	8	K	Alcohol dehydrogenase	adh
map00010 Glycolysis / Gluconeogenesis	4.71075e-08	33	2.01	Q8CQ56	337	K	Alcohol dehydrogenase	adh
map00010 Glycolysis / Gluconeogenesis	4.71075e-08	33	2.01	Q8CQ56	198	K	Alcohol dehydrogenase	adh
map00010 Glycolysis / Gluconeogenesis	4.71075e-08	33	2.01	Q8CQ56	30	K	Alcohol dehydrogenase	adh
map00010 Glycolysis / Gluconeogenesis	4.71075e-08	33	2.01	Q8CQ56	307	K	Alcohol dehydrogenase	adh
map00010 Glycolysis / Gluconeogenesis	4.71075e-08	33	2.01	Q8CQ56	266	K	Alcohol dehydrogenase	adh
map00010 Glycolysis / Gluconeogenesis	4.71075e-08	33	2.01	Q8CQ56	17	K	Alcohol dehydrogenase	adh
map00010 Glycolysis / Gluconeogenesis	4.71075e-08	33	2.01	Q8CMZ0	42	K	L-lactate dehydrogenase	ldh
map00010 Glycolysis / Gluconeogenesis	4.71075e-08	33	2.01	Q8CMZ0	72	K	L-lactate dehydrogenase	ldh
map00010 Glycolysis / Gluconeogenesis	4.71075e-08	33	2.01	Q8CMZ0	97	K	L-lactate dehydrogenase	ldh
map00010 Glycolysis / Gluconeogenesis	4.71075e-08	33	2.01	Q8CMZ0	86	K	L-lactate dehydrogenase	ldh
map00010 Glycolysis / Gluconeogenesis	4.71075e-08	33	2.01	Q8CMZ0	133	K	L-lactate dehydrogenase	ldh
map00010 Glycolysis / Gluconeogenesis	4.71075e-08	33	2.01	Q8CMZ0	300	K	L-lactate dehydrogenase	ldh
map00010 Glycolysis / Gluconeogenesis	4.71075e-08	33	2.01	Q8CN24	354	K	Putative aldehyde dehydrogenase AldA	aldA
map00010 Glycolysis / Gluconeogenesis	4.71075e-08	33	2.01	Q8CN24	312	K	Putative aldehyde dehydrogenase AldA	aldA
map00010 Glycolysis / Gluconeogenesis	4.71075e-08	33	2.01	Q8CN24	463	K	Putative aldehyde dehydrogenase AldA	aldA
map00010 Glycolysis / Gluconeogenesis	4.71075e-08	33	2.01	Q8CN24	473	K	Putative aldehyde dehydrogenase AldA	aldA
map00010 Glycolysis / Gluconeogenesis	4.71075e-08	33	2.01	Q8CPN2	109	K	Pyruvate dehydrogenase E1 component subunit beta	pdhB
map00010 Glycolysis / Gluconeogenesis	4.71075e-08	33	2.01	Q8CPN2	190	K	Pyruvate dehydrogenase E1 component subunit beta	pdhB
map00010 Glycolysis / Gluconeogenesis	4.71075e-08	33	2.01	Q8CPN2	312	K	Pyruvate dehydrogenase E1 component subunit beta	pdhB
map00010 Glycolysis / Gluconeogenesis	4.71075e-08	33	2.01	Q8CPN2	46	K	Pyruvate dehydrogenase E1 component subunit beta	pdhB
map00010 Glycolysis / Gluconeogenesis	4.71075e-08	33	2.01	Q8CP79	70	K	PTS system glucose-specific EIIA component	crr
map00010 Glycolysis / Gluconeogenesis	4.71075e-08	33	2.01	Q8CP79	14	K	PTS system glucose-specific EIIA component	crr
map00010 Glycolysis / Gluconeogenesis	4.71075e-08	33	2.01	Q8CS25	513	K	Phosphoenolpyruvate carboxykinase [ATP]	pckA
map00010 Glycolysis / Gluconeogenesis	4.71075e-08	33	2.01	Q8CS25	54	K	Phosphoenolpyruvate carboxykinase [ATP]	pckA
map00010 Glycolysis / Gluconeogenesis	4.71075e-08	33	2.01	Q8CNY0	194	K	Glyceraldehyde-3-phosphate dehydrogenase 2	gapA2
map00010 Glycolysis / Gluconeogenesis	4.71075e-08	33	2.01	Q8CNY0	57	K	Glyceraldehyde-3-phosphate dehydrogenase 2	gapA2
map04122 Sulfur relay system	0.495911	5	1.11	Q8CNW7	404	K	Probable tRNA sulfurtransferase	thiI
map04122 Sulfur relay system	0.495911	5	1.11	A0A0H2VIX7	44	K	Iron-sulfur cofactor synthesis protein-like protein	SE_1305
map04122 Sulfur relay system	0.495911	5	1.11	Q8CSA5	91	K	tRNA-specific 2-thiouridylase MnmA	mnmA
map04122 Sulfur relay system	0.495911	5	1.11	A0A0H2VJF6	45	K	Uncharacterized protein	SE_2059
map04122 Sulfur relay system	0.495911	5	1.11	Q8CNE6	2	K	"GTP 3',8-cyclase"	moaA
map00130 Ubiquinone and other terpenoid-quinone biosynthesis	0.788491	3	0.81	Q8CSH9	39	K	Demethylmenaquinone methyltransferase	menG
map00130 Ubiquinone and other terpenoid-quinone biosynthesis	0.788491	3	0.81	A0A0H2VFL9	205	K	Putative menaquinone-specific isochorismate synthase	SE_0743
map00130 Ubiquinone and other terpenoid-quinone biosynthesis	0.788491	3	0.81	A0A0H2VFL9	33	K	Putative menaquinone-specific isochorismate synthase	SE_0743
map00130 Ubiquinone and other terpenoid-quinone biosynthesis	0.788491	3	0.81	A0A0H2VFL9	70	K	Putative menaquinone-specific isochorismate synthase	SE_0743
map00130 Ubiquinone and other terpenoid-quinone biosynthesis	0.788491	3	0.81	A0A0H2VFL9	275	K	Putative menaquinone-specific isochorismate synthase	SE_0743
map00130 Ubiquinone and other terpenoid-quinone biosynthesis	0.788491	3	0.81	Q8CPQ4	77	K	"1,4-dihydroxy-2-naphthoyl-CoA synthase"	menB
map00130 Ubiquinone and other terpenoid-quinone biosynthesis	0.788491	3	0.81	Q8CPQ4	270	K	"1,4-dihydroxy-2-naphthoyl-CoA synthase"	menB
map00521 Streptomycin biosynthesis	0.0280719	4	2.44	A0A0H2VHP9	160	K	Suppressor protein suhB	SE_1884
map00521 Streptomycin biosynthesis	0.0280719	4	2.44	Q8CN38	413	K	Phosphoglucomutase	pgcA
map00521 Streptomycin biosynthesis	0.0280719	4	2.44	Q8CN38	44	K	Phosphoglucomutase	pgcA
map00521 Streptomycin biosynthesis	0.0280719	4	2.44	A0A0H2VIT7	22	K	Glucokinase	SE_1233
map00521 Streptomycin biosynthesis	0.0280719	4	2.44	A0A0H2VHA1	148	K	Putative myo-inositol-1(Or 4)-monophosphatase	SE_0805
map00780 Biotin metabolism	0.797766	4	0.81	A0A0H2VG89	3	K	Bifunctional ligase/repressor BirA	birA
map00780 Biotin metabolism	0.797766	4	0.81	Q8CNJ9	33	K	3-hydroxyacyl-[acyl-carrier-protein] dehydratase FabZ	fabZ
map00780 Biotin metabolism	0.797766	4	0.81	Q8CNJ9	116	K	3-hydroxyacyl-[acyl-carrier-protein] dehydratase FabZ	fabZ
map00780 Biotin metabolism	0.797766	4	0.81	A0A0H2VH25	88	K	3-oxoacyl-[acyl-carrier-protein] synthase 2	SE_0678
map00780 Biotin metabolism	0.797766	4	0.81	Q8CPI3	39	K	3-oxoacyl-[acyl-carrier-protein] reductase FabG	fabG
map00621 Dioxin degradation	0.410345	1	2.44	Q8CPB7	18	K	Probable tautomerase SE_1045	SE_1045
map00621 Dioxin degradation	0.410345	1	2.44	Q8CPB7	48	K	Probable tautomerase SE_1045	SE_1045
map00785 Lipoic acid metabolism	0.190794	3	1.83	A0A0H2VFK3	232	K	Lipoate--protein ligase	SE_0728
map00785 Lipoic acid metabolism	0.190794	3	1.83	A0A0H2VFK3	199	K	Lipoate--protein ligase	SE_0728
map00785 Lipoic acid metabolism	0.190794	3	1.83	Q8CPW4	35	K	Lipoyl synthase	lipA
map00785 Lipoic acid metabolism	0.190794	3	1.83	Q8CPW4	29	K	Lipoyl synthase	lipA
map00785 Lipoic acid metabolism	0.190794	3	1.83	A0A0H2VGC6	248	K	Octanoyltransferase LipM	lipM
map00785 Lipoic acid metabolism	0.190794	3	1.83	A0A0H2VGC6	164	K	Octanoyltransferase LipM	lipM
map00785 Lipoic acid metabolism	0.190794	3	1.83	A0A0H2VGC6	208	K	Octanoyltransferase LipM	lipM
map00400 Phenylalanine, tyrosine and tryptophan biosynthesis	0.974253	4	0.54	A0A0H2VIA3	231	K	Phospho-2-dehydro-3-deoxyheptonate aldolase	SE_1410
map00400 Phenylalanine, tyrosine and tryptophan biosynthesis	0.974253	4	0.54	A0A0H2VIA3	155	K	Phospho-2-dehydro-3-deoxyheptonate aldolase	SE_1410
map00400 Phenylalanine, tyrosine and tryptophan biosynthesis	0.974253	4	0.54	A0A0H2VIA3	100	K	Phospho-2-dehydro-3-deoxyheptonate aldolase	SE_1410
map00400 Phenylalanine, tyrosine and tryptophan biosynthesis	0.974253	4	0.54	Q8CP68	29	K	3-dehydroquinate synthase	aroB
map00400 Phenylalanine, tyrosine and tryptophan biosynthesis	0.974253	4	0.54	Q8CP67	34	K	Chorismate synthase	aroC
map00400 Phenylalanine, tyrosine and tryptophan biosynthesis	0.974253	4	0.54	Q8CSI1	130	K	3-phosphoshikimate 1-carboxyvinyltransferase	aroA
map00040 Pentose and glucuronate interconversions	0.783364	2	0.81	Q8CR67	191	K	UTP--glucose-1-phosphate uridylyltransferase	gtaB
map00040 Pentose and glucuronate interconversions	0.783364	2	0.81	Q8CR67	83	K	UTP--glucose-1-phosphate uridylyltransferase	gtaB
map00040 Pentose and glucuronate interconversions	0.783364	2	0.81	Q8CR67	284	K	UTP--glucose-1-phosphate uridylyltransferase	gtaB
map00040 Pentose and glucuronate interconversions	0.783364	2	0.81	Q8CRC6	512	K	Ribulokinase	araB
map00052 Galactose metabolism	0.011073	11	1.79	Q8CS68	212	K	ATP-dependent 6-phosphofructokinase	pfkA
map00052 Galactose metabolism	0.011073	11	1.79	Q8CS68	77	K	ATP-dependent 6-phosphofructokinase	pfkA
map00052 Galactose metabolism	0.011073	11	1.79	Q8CNF5	186	K	"Tagatose 1,6-diphosphate aldolase"	lacD
map00052 Galactose metabolism	0.011073	11	1.79	Q8CNF5	117	K	"Tagatose 1,6-diphosphate aldolase"	lacD
map00052 Galactose metabolism	0.011073	11	1.79	A0A0H2VGB4	468	K	Alpha-amylase	SE_1191
map00052 Galactose metabolism	0.011073	11	1.79	A0A0H2VGB4	302	K	Alpha-amylase	SE_1191
map00052 Galactose metabolism	0.011073	11	1.79	A0A0H2VGB4	393	K	Alpha-amylase	SE_1191
map00052 Galactose metabolism	0.011073	11	1.79	A0A0H2VGB4	206	K	Alpha-amylase	SE_1191
map00052 Galactose metabolism	0.011073	11	1.79	A0A0H2VGB4	405	K	Alpha-amylase	SE_1191
map00052 Galactose metabolism	0.011073	11	1.79	A0A0H2VGB4	220	K	Alpha-amylase	SE_1191
map00052 Galactose metabolism	0.011073	11	1.79	A0A0H2VGB4	167	K	Alpha-amylase	SE_1191
map00052 Galactose metabolism	0.011073	11	1.79	Q8CN38	413	K	Phosphoglucomutase	pgcA
map00052 Galactose metabolism	0.011073	11	1.79	Q8CN38	44	K	Phosphoglucomutase	pgcA
map00052 Galactose metabolism	0.011073	11	1.79	Q8CNF6	101	K	PTS system lactose-specific EIIA component	lacF
map00052 Galactose metabolism	0.011073	11	1.79	Q8CRJ3	166	K	Galactose-6-phosphate isomerase subunit LacB	lacB
map00052 Galactose metabolism	0.011073	11	1.79	Q8CRJ2	12	K	Galactose-6-phosphate isomerase subunit LacA	lacA
map00052 Galactose metabolism	0.011073	11	1.79	Q8CR67	191	K	UTP--glucose-1-phosphate uridylyltransferase	gtaB
map00052 Galactose metabolism	0.011073	11	1.79	Q8CR67	83	K	UTP--glucose-1-phosphate uridylyltransferase	gtaB
map00052 Galactose metabolism	0.011073	11	1.79	Q8CR67	284	K	UTP--glucose-1-phosphate uridylyltransferase	gtaB
map00052 Galactose metabolism	0.011073	11	1.79	Q8CNF8	363	K	6-phospho-beta-galactosidase	lacG
map00052 Galactose metabolism	0.011073	11	1.79	Q8CNF8	221	K	6-phospho-beta-galactosidase	lacG
map00052 Galactose metabolism	0.011073	11	1.79	Q8CNF8	387	K	6-phospho-beta-galactosidase	lacG
map00052 Galactose metabolism	0.011073	11	1.79	A0A0H2VIT7	22	K	Glucokinase	SE_1233
map00052 Galactose metabolism	0.011073	11	1.79	Q8CNF7	432	K	PTS system lactose-specific EIICB component	lacE
map00030 Pentose phosphate pathway	0.025693	14	1.55	Q8CS68	212	K	ATP-dependent 6-phosphofructokinase	pfkA
map00030 Pentose phosphate pathway	0.025693	14	1.55	Q8CS68	77	K	ATP-dependent 6-phosphofructokinase	pfkA
map00030 Pentose phosphate pathway	0.025693	14	1.55	Q8CNH9	185	K	Phosphopentomutase	deoB
map00030 Pentose phosphate pathway	0.025693	14	1.55	Q8CNH9	218	K	Phosphopentomutase	deoB
map00030 Pentose phosphate pathway	0.025693	14	1.55	A0A0H2VJJ5	78	K	Ribokinase	rbsK
map00030 Pentose phosphate pathway	0.025693	14	1.55	A0A0H2VJJ5	290	K	Ribokinase	rbsK
map00030 Pentose phosphate pathway	0.025693	14	1.55	Q8CN38	413	K	Phosphoglucomutase	pgcA
map00030 Pentose phosphate pathway	0.025693	14	1.55	Q8CN38	44	K	Phosphoglucomutase	pgcA
map00030 Pentose phosphate pathway	0.025693	14	1.55	Q8CT80	163	K	Glucose-6-phosphate isomerase	pgi
map00030 Pentose phosphate pathway	0.025693	14	1.55	Q8CT80	67	K	Glucose-6-phosphate isomerase	pgi
map00030 Pentose phosphate pathway	0.025693	14	1.55	Q8CT80	330	K	Glucose-6-phosphate isomerase	pgi
map00030 Pentose phosphate pathway	0.025693	14	1.55	Q8CT80	289	K	Glucose-6-phosphate isomerase	pgi
map00030 Pentose phosphate pathway	0.025693	14	1.55	Q8CT80	24	K	Glucose-6-phosphate isomerase	pgi
map00030 Pentose phosphate pathway	0.025693	14	1.55	Q8CT80	17	K	Glucose-6-phosphate isomerase	pgi
map00030 Pentose phosphate pathway	0.025693	14	1.55	Q8CN27	292	K	"Fructose-1,6-bisphosphatase class 3"	fbp
map00030 Pentose phosphate pathway	0.025693	14	1.55	Q8CP47	292	K	"6-phosphogluconate dehydrogenase, decarboxylating"	gnd
map00030 Pentose phosphate pathway	0.025693	14	1.55	Q8CP47	37	K	"6-phosphogluconate dehydrogenase, decarboxylating"	gnd
map00030 Pentose phosphate pathway	0.025693	14	1.55	Q8CP47	341	K	"6-phosphogluconate dehydrogenase, decarboxylating"	gnd
map00030 Pentose phosphate pathway	0.025693	14	1.55	Q8CP47	313	K	"6-phosphogluconate dehydrogenase, decarboxylating"	gnd
map00030 Pentose phosphate pathway	0.025693	14	1.55	Q8CNI3	269	K	Fructose-bisphosphate aldolase	fba
map00030 Pentose phosphate pathway	0.025693	14	1.55	Q8CNI3	252	K	Fructose-bisphosphate aldolase	fba
map00030 Pentose phosphate pathway	0.025693	14	1.55	Q8CNI3	259	K	Fructose-bisphosphate aldolase	fba
map00030 Pentose phosphate pathway	0.025693	14	1.55	Q8CNI3	185	K	Fructose-bisphosphate aldolase	fba
map00030 Pentose phosphate pathway	0.025693	14	1.55	Q8CNI3	7	K	Fructose-bisphosphate aldolase	fba
map00030 Pentose phosphate pathway	0.025693	14	1.55	A0A0H2VIQ5	152	K	Glucose-6-phosphate 1-dehydrogenase	zwf
map00030 Pentose phosphate pathway	0.025693	14	1.55	A0A0H2VIQ5	173	K	Glucose-6-phosphate 1-dehydrogenase	zwf
map00030 Pentose phosphate pathway	0.025693	14	1.55	A0A0H2VIQ5	146	K	Glucose-6-phosphate 1-dehydrogenase	zwf
map00030 Pentose phosphate pathway	0.025693	14	1.55	A0A0H2VIQ5	285	K	Glucose-6-phosphate 1-dehydrogenase	zwf
map00030 Pentose phosphate pathway	0.025693	14	1.55	Q8CQ69	169	K	3-hexulose-6-phosphate synthase	SE_0341
map00030 Pentose phosphate pathway	0.025693	14	1.55	Q8CQ69	101	K	3-hexulose-6-phosphate synthase	SE_0341
map00030 Pentose phosphate pathway	0.025693	14	1.55	Q8CMY5	104	K	Fructose-bisphosphate aldolase class 1	fda
map00030 Pentose phosphate pathway	0.025693	14	1.55	Q8CMY5	251	K	Fructose-bisphosphate aldolase class 1	fda
map00030 Pentose phosphate pathway	0.025693	14	1.55	Q8CMY5	190	K	Fructose-bisphosphate aldolase class 1	fda
map00030 Pentose phosphate pathway	0.025693	14	1.55	Q8CMY5	185	K	Fructose-bisphosphate aldolase class 1	fda
map00030 Pentose phosphate pathway	0.025693	14	1.55	Q8CMY5	3	K	Fructose-bisphosphate aldolase class 1	fda
map00030 Pentose phosphate pathway	0.025693	14	1.55	Q8CMY5	138	K	Fructose-bisphosphate aldolase class 1	fda
map00030 Pentose phosphate pathway	0.025693	14	1.55	Q8CMY5	295	K	Fructose-bisphosphate aldolase class 1	fda
map00030 Pentose phosphate pathway	0.025693	14	1.55	Q8CMY5	8	K	Fructose-bisphosphate aldolase class 1	fda
map00030 Pentose phosphate pathway	0.025693	14	1.55	Q8CMY5	101	K	Fructose-bisphosphate aldolase class 1	fda
map00030 Pentose phosphate pathway	0.025693	14	1.55	Q8CMY5	117	K	Fructose-bisphosphate aldolase class 1	fda
map00030 Pentose phosphate pathway	0.025693	14	1.55	Q8CMY5	223	K	Fructose-bisphosphate aldolase class 1	fda
map00030 Pentose phosphate pathway	0.025693	14	1.55	Q8CQU7	188	K	Ribose-phosphate pyrophosphokinase	prs
map00030 Pentose phosphate pathway	0.025693	14	1.55	Q8CQU7	202	K	Ribose-phosphate pyrophosphokinase	prs
map00030 Pentose phosphate pathway	0.025693	14	1.55	Q8CPC7	283	K	Transketolase	tkt
map00030 Pentose phosphate pathway	0.025693	14	1.55	Q8CPC7	396	K	Transketolase	tkt
map00030 Pentose phosphate pathway	0.025693	14	1.55	Q8CPC7	5	K	Transketolase	tkt
map00030 Pentose phosphate pathway	0.025693	14	1.55	Q8CNH7	170	K	Deoxyribose-phosphate aldolase	deoC
map00030 Pentose phosphate pathway	0.025693	14	1.55	Q8CNH7	13	K	Deoxyribose-phosphate aldolase	deoC
map00473 D-Alanine metabolism	0.958471	1	0.41	Q8CRP5	134	K	D-alanine--D-alanine ligase	ddl
map00473 D-Alanine metabolism	0.958471	1	0.41	Q8CRP5	157	K	D-alanine--D-alanine ligase	ddl
map00590 Arachidonic acid metabolism	0.652585	1	1.22	Q8CSR9	123	K	Glutathione peroxidase homolog BsaA	bsaA
map00590 Arachidonic acid metabolism	0.652585	1	1.22	Q8CSR9	145	K	Glutathione peroxidase homolog BsaA	bsaA
map00590 Arachidonic acid metabolism	0.652585	1	1.22	Q8CSR9	53	K	Glutathione peroxidase homolog BsaA	bsaA
map00590 Arachidonic acid metabolism	0.652585	1	1.22	Q8CSR9	151	K	Glutathione peroxidase homolog BsaA	bsaA
map05132 Salmonella infection	0.410345	1	2.44	A0A0H2VHG2	5	K	Putative flavohemoprotein	SE_0440
map02026 Biofilm formation - Escherichia coli	0.168104	2	2.44	Q8CNI0	144	K	S-ribosylhomocysteine lyase	luxS
map02026 Biofilm formation - Escherichia coli	0.168104	2	2.44	Q8CP79	70	K	PTS system glucose-specific EIIA component	crr
map02026 Biofilm formation - Escherichia coli	0.168104	2	2.44	Q8CP79	14	K	PTS system glucose-specific EIIA component	crr
map01503 Cationic antimicrobial peptide (CAMP) resistance	0.974759	2	0.44	Q8CP02	175	K	Probable cell wall amidase LytH	lytH
map01503 Cationic antimicrobial peptide (CAMP) resistance	0.974759	2	0.44	Q8CPC0	304	K	Phosphatidylglycerol lysyltransferase	mprF
map00350 Tyrosine metabolism	0.429857	4	1.22	A0A0H2VGU2	760	K	Aldehyde-alcohol dehydrogenase	SE_0506
map00350 Tyrosine metabolism	0.429857	4	1.22	A0A0H2VGU2	703	K	Aldehyde-alcohol dehydrogenase	SE_0506
map00350 Tyrosine metabolism	0.429857	4	1.22	A0A0H2VGU2	307	K	Aldehyde-alcohol dehydrogenase	SE_0506
map00350 Tyrosine metabolism	0.429857	4	1.22	A0A0H2VGU2	105	K	Aldehyde-alcohol dehydrogenase	SE_0506
map00350 Tyrosine metabolism	0.429857	4	1.22	Q8CPT8	62	K	Uncharacterized protein SE_0665	SE_0665
map00350 Tyrosine metabolism	0.429857	4	1.22	Q8CPT8	247	K	Uncharacterized protein SE_0665	SE_0665
map00350 Tyrosine metabolism	0.429857	4	1.22	A0A0H2VJ66	27	K	Uncharacterized protein	SE_1950
map00350 Tyrosine metabolism	0.429857	4	1.22	A0A0H2VJ66	292	K	Uncharacterized protein	SE_1950
map00350 Tyrosine metabolism	0.429857	4	1.22	A0A0H2VJ66	214	K	Uncharacterized protein	SE_1950
map00350 Tyrosine metabolism	0.429857	4	1.22	Q8CQ56	8	K	Alcohol dehydrogenase	adh
map00350 Tyrosine metabolism	0.429857	4	1.22	Q8CQ56	337	K	Alcohol dehydrogenase	adh
map00350 Tyrosine metabolism	0.429857	4	1.22	Q8CQ56	198	K	Alcohol dehydrogenase	adh
map00350 Tyrosine metabolism	0.429857	4	1.22	Q8CQ56	30	K	Alcohol dehydrogenase	adh
map00350 Tyrosine metabolism	0.429857	4	1.22	Q8CQ56	307	K	Alcohol dehydrogenase	adh
map00350 Tyrosine metabolism	0.429857	4	1.22	Q8CQ56	266	K	Alcohol dehydrogenase	adh
map00350 Tyrosine metabolism	0.429857	4	1.22	Q8CQ56	17	K	Alcohol dehydrogenase	adh
map00240 Pyrimidine metabolism	0.364786	12	1.12	Q8CNI2	453	K	CTP synthase	pyrG
map00240 Pyrimidine metabolism	0.364786	12	1.12	Q8CNI2	232	K	CTP synthase	pyrG
map00240 Pyrimidine metabolism	0.364786	12	1.12	Q8CNI2	322	K	CTP synthase	pyrG
map00240 Pyrimidine metabolism	0.364786	12	1.12	Q8CNI2	100	K	CTP synthase	pyrG
map00240 Pyrimidine metabolism	0.364786	12	1.12	A0A0H2VF65	8	K	Ribonucleoside-diphosphate reductase	SE_0513
map00240 Pyrimidine metabolism	0.364786	12	1.12	Q8CPJ6	70	K	Dihydroorotase	pyrC
map00240 Pyrimidine metabolism	0.364786	12	1.12	Q8CRN4	71	K	Uracil phosphoribosyltransferase	upp
map00240 Pyrimidine metabolism	0.364786	12	1.12	P0C0M5	122	K	Thymidylate synthase	thyA
map00240 Pyrimidine metabolism	0.364786	12	1.12	P0C0M5	140	K	Thymidylate synthase	thyA
map00240 Pyrimidine metabolism	0.364786	12	1.12	A0A0H2VI40	6	K	Dihydroorotate dehydrogenase (quinone)	SE_2132
map00240 Pyrimidine metabolism	0.364786	12	1.12	Q8CSU1	6	K	Uridylate kinase	pyrH
map00240 Pyrimidine metabolism	0.364786	12	1.12	A0A0H2VIM4	602	K	Anaerobic ribonucleoside-triphosphate reductase	SE_2172
map00240 Pyrimidine metabolism	0.364786	12	1.12	A0A0H2VIM4	211	K	Anaerobic ribonucleoside-triphosphate reductase	SE_2172
map00240 Pyrimidine metabolism	0.364786	12	1.12	A0A0H2VGU7	220	K	Ribonucleoside-diphosphate reductase minor subunit	SE_0514
map00240 Pyrimidine metabolism	0.364786	12	1.12	Q8CSI0	9	K	Nucleoside diphosphate kinase	ndk
map00240 Pyrimidine metabolism	0.364786	12	1.12	Q8CSI0	140	K	Nucleoside diphosphate kinase	ndk
map00240 Pyrimidine metabolism	0.364786	12	1.12	Q8CNH8	123	K	Pyrimidine-nucleoside phosphorylase	pdp
map00240 Pyrimidine metabolism	0.364786	12	1.12	Q8CNH8	162	K	Pyrimidine-nucleoside phosphorylase	pdp
map00240 Pyrimidine metabolism	0.364786	12	1.12	Q8CNH8	390	K	Pyrimidine-nucleoside phosphorylase	pdp
map00240 Pyrimidine metabolism	0.364786	12	1.12	Q8CRM9	196	K	Thymidine kinase	tdk
map00240 Pyrimidine metabolism	0.364786	12	1.12	Q8CRM9	43	K	Thymidine kinase	tdk
map00520 Amino sugar and nucleotide sugar metabolism	0.0986261	12	1.39	A0A0H2VHM0	6	K	Mannnose-6 phospate isomelase pmi	SE_1743
map00520 Amino sugar and nucleotide sugar metabolism	0.0986261	12	1.39	Q8CN38	413	K	Phosphoglucomutase	pgcA
map00520 Amino sugar and nucleotide sugar metabolism	0.0986261	12	1.39	Q8CN38	44	K	Phosphoglucomutase	pgcA
map00520 Amino sugar and nucleotide sugar metabolism	0.0986261	12	1.39	Q8CRL1	56	K	Glutamine--fructose-6-phosphate aminotransferase [isomerizing]	glmS
map00520 Amino sugar and nucleotide sugar metabolism	0.0986261	12	1.39	Q8CRL1	590	K	Glutamine--fructose-6-phosphate aminotransferase [isomerizing]	glmS
map00520 Amino sugar and nucleotide sugar metabolism	0.0986261	12	1.39	Q8CRL1	216	K	Glutamine--fructose-6-phosphate aminotransferase [isomerizing]	glmS
map00520 Amino sugar and nucleotide sugar metabolism	0.0986261	12	1.39	Q8CRL1	275	K	Glutamine--fructose-6-phosphate aminotransferase [isomerizing]	glmS
map00520 Amino sugar and nucleotide sugar metabolism	0.0986261	12	1.39	Q8CRL1	531	K	Glutamine--fructose-6-phosphate aminotransferase [isomerizing]	glmS
map00520 Amino sugar and nucleotide sugar metabolism	0.0986261	12	1.39	Q8CRL1	223	K	Glutamine--fructose-6-phosphate aminotransferase [isomerizing]	glmS
map00520 Amino sugar and nucleotide sugar metabolism	0.0986261	12	1.39	Q8CT80	163	K	Glucose-6-phosphate isomerase	pgi
map00520 Amino sugar and nucleotide sugar metabolism	0.0986261	12	1.39	Q8CT80	67	K	Glucose-6-phosphate isomerase	pgi
map00520 Amino sugar and nucleotide sugar metabolism	0.0986261	12	1.39	Q8CT80	330	K	Glucose-6-phosphate isomerase	pgi
map00520 Amino sugar and nucleotide sugar metabolism	0.0986261	12	1.39	Q8CT80	289	K	Glucose-6-phosphate isomerase	pgi
map00520 Amino sugar and nucleotide sugar metabolism	0.0986261	12	1.39	Q8CT80	24	K	Glucose-6-phosphate isomerase	pgi
map00520 Amino sugar and nucleotide sugar metabolism	0.0986261	12	1.39	Q8CT80	17	K	Glucose-6-phosphate isomerase	pgi
map00520 Amino sugar and nucleotide sugar metabolism	0.0986261	12	1.39	Q7CCJ4	493	K	PTS system glucose-specific EIICBA component	ptsG
map00520 Amino sugar and nucleotide sugar metabolism	0.0986261	12	1.39	Q7CCJ4	460	K	PTS system glucose-specific EIICBA component	ptsG
map00520 Amino sugar and nucleotide sugar metabolism	0.0986261	12	1.39	Q8CNH0	370	K	Phosphoglucosamine mutase	glmM
map00520 Amino sugar and nucleotide sugar metabolism	0.0986261	12	1.39	Q8CNH0	3	K	Phosphoglucosamine mutase	glmM
map00520 Amino sugar and nucleotide sugar metabolism	0.0986261	12	1.39	Q8CR67	191	K	UTP--glucose-1-phosphate uridylyltransferase	gtaB
map00520 Amino sugar and nucleotide sugar metabolism	0.0986261	12	1.39	Q8CR67	83	K	UTP--glucose-1-phosphate uridylyltransferase	gtaB
map00520 Amino sugar and nucleotide sugar metabolism	0.0986261	12	1.39	Q8CR67	284	K	UTP--glucose-1-phosphate uridylyltransferase	gtaB
map00520 Amino sugar and nucleotide sugar metabolism	0.0986261	12	1.39	A0A0H2VHD4	24	K	Fructokinase	SE_1639
map00520 Amino sugar and nucleotide sugar metabolism	0.0986261	12	1.39	Q8CPZ7	26	K	UDP-N-acetylenolpyruvoylglucosamine reductase	murB
map00520 Amino sugar and nucleotide sugar metabolism	0.0986261	12	1.39	Q8CP79	70	K	PTS system glucose-specific EIIA component	crr
map00520 Amino sugar and nucleotide sugar metabolism	0.0986261	12	1.39	Q8CP79	14	K	PTS system glucose-specific EIIA component	crr
map00520 Amino sugar and nucleotide sugar metabolism	0.0986261	12	1.39	A0A0H2VIT7	22	K	Glucokinase	SE_1233
map00520 Amino sugar and nucleotide sugar metabolism	0.0986261	12	1.39	Q8CRM7	335	K	UDP-N-acetylglucosamine 1-carboxyvinyltransferase 2	murA2
map00520 Amino sugar and nucleotide sugar metabolism	0.0986261	12	1.39	Q8CRM7	15	K	UDP-N-acetylglucosamine 1-carboxyvinyltransferase 2	murA2
map00564 Glycerophospholipid metabolism	0.335411	7	1.22	P59253	193	K	Glycerol-3-phosphate acyltransferase	plsY
map00564 Glycerophospholipid metabolism	0.335411	7	1.22	A0A0H2VH29	124	K	Acylglycerol-3-phosphate O-acyltransferase-like protein	SE_1404
map00564 Glycerophospholipid metabolism	0.335411	7	1.22	A0A0H2VH29	206	K	Acylglycerol-3-phosphate O-acyltransferase-like protein	SE_1404
map00564 Glycerophospholipid metabolism	0.335411	7	1.22	Q8CP63	99	K	Glycerol-3-phosphate dehydrogenase [NAD(P)+]	gpsA
map00564 Glycerophospholipid metabolism	0.335411	7	1.22	Q8CP63	89	K	Glycerol-3-phosphate dehydrogenase [NAD(P)+]	gpsA
map00564 Glycerophospholipid metabolism	0.335411	7	1.22	Q8CP63	114	K	Glycerol-3-phosphate dehydrogenase [NAD(P)+]	gpsA
map00564 Glycerophospholipid metabolism	0.335411	7	1.22	Q8CPE6	350	K	Aerobic glycerol-3-phosphate dehydrogenase	glpD
map00564 Glycerophospholipid metabolism	0.335411	7	1.22	Q8CPE6	203	K	Aerobic glycerol-3-phosphate dehydrogenase	glpD
map00564 Glycerophospholipid metabolism	0.335411	7	1.22	Q8CPE6	276	K	Aerobic glycerol-3-phosphate dehydrogenase	glpD
map00564 Glycerophospholipid metabolism	0.335411	7	1.22	Q8CPE6	225	K	Aerobic glycerol-3-phosphate dehydrogenase	glpD
map00564 Glycerophospholipid metabolism	0.335411	7	1.22	Q8CPE6	7	K	Aerobic glycerol-3-phosphate dehydrogenase	glpD
map00564 Glycerophospholipid metabolism	0.335411	7	1.22	Q8CPE6	358	K	Aerobic glycerol-3-phosphate dehydrogenase	glpD
map00564 Glycerophospholipid metabolism	0.335411	7	1.22	Q8CPE6	395	K	Aerobic glycerol-3-phosphate dehydrogenase	glpD
map00564 Glycerophospholipid metabolism	0.335411	7	1.22	Q8CPE6	179	K	Aerobic glycerol-3-phosphate dehydrogenase	glpD
map00564 Glycerophospholipid metabolism	0.335411	7	1.22	Q8CPE6	148	K	Aerobic glycerol-3-phosphate dehydrogenase	glpD
map00564 Glycerophospholipid metabolism	0.335411	7	1.22	Q8CNK3	268	K	Cardiolipin synthase 2	cls2
map00564 Glycerophospholipid metabolism	0.335411	7	1.22	A0A0H2VF52	123	K	Teichoic acid biosynthesis protein	SE_0415
map00564 Glycerophospholipid metabolism	0.335411	7	1.22	Q8CRU5	246	K	Diacylglycerol kinase	dagK
map04621 NOD-like receptor signaling pathway	0.410345	1	2.44	Q8CPL5	102	K	Thioredoxin	trxA
map04621 NOD-like receptor signaling pathway	0.410345	1	2.44	Q8CPL5	54	K	Thioredoxin	trxA
map00430 Taurine and hypotaurine metabolism	0.477185	3	1.22	Q8CS60	357	K	Acetate kinase	ackA
map00430 Taurine and hypotaurine metabolism	0.477185	3	1.22	Q8CS60	175	K	Acetate kinase	ackA
map00430 Taurine and hypotaurine metabolism	0.477185	3	1.22	Q8CS60	79	K	Acetate kinase	ackA
map00430 Taurine and hypotaurine metabolism	0.477185	3	1.22	Q8CQ62	210	K	Phosphate acetyltransferase	pta
map00430 Taurine and hypotaurine metabolism	0.477185	3	1.22	Q8CNW8	74	K	Alanine dehydrogenase	ald
map00430 Taurine and hypotaurine metabolism	0.477185	3	1.22	Q8CNW8	169	K	Alanine dehydrogenase	ald
map00430 Taurine and hypotaurine metabolism	0.477185	3	1.22	Q8CNW8	7	K	Alanine dehydrogenase	ald
map00430 Taurine and hypotaurine metabolism	0.477185	3	1.22	Q8CNW8	10	K	Alanine dehydrogenase	ald
map00720 Carbon fixation pathways in prokaryotes	0.00169505	19	1.71	A0A0H2VG08	38	K	Succinate dehydrogenase flavoprotein subunit	SE_0841
map00720 Carbon fixation pathways in prokaryotes	0.00169505	19	1.71	A0A0H2VG08	450	K	Succinate dehydrogenase flavoprotein subunit	SE_0841
map00720 Carbon fixation pathways in prokaryotes	0.00169505	19	1.71	A0A0H2VG08	534	K	Succinate dehydrogenase flavoprotein subunit	SE_0841
map00720 Carbon fixation pathways in prokaryotes	0.00169505	19	1.71	A0A0H2VG08	477	K	Succinate dehydrogenase flavoprotein subunit	SE_0841
map00720 Carbon fixation pathways in prokaryotes	0.00169505	19	1.71	A0A0H2VIL4	137	K	Acetate-CoA ligase	SE_2161
map00720 Carbon fixation pathways in prokaryotes	0.00169505	19	1.71	A0A0H2VIL4	27	K	Acetate-CoA ligase	SE_2161
map00720 Carbon fixation pathways in prokaryotes	0.00169505	19	1.71	A0A0H2VIL4	103	K	Acetate-CoA ligase	SE_2161
map00720 Carbon fixation pathways in prokaryotes	0.00169505	19	1.71	A0A0H2VIL4	492	K	Acetate-CoA ligase	SE_2161
map00720 Carbon fixation pathways in prokaryotes	0.00169505	19	1.71	A0A0H2VIL4	383	K	Acetate-CoA ligase	SE_2161
map00720 Carbon fixation pathways in prokaryotes	0.00169505	19	1.71	A0A0H2VIL4	525	K	Acetate-CoA ligase	SE_2161
map00720 Carbon fixation pathways in prokaryotes	0.00169505	19	1.71	Q8CPP4	240	K	Bifunctional protein FolD	folD
map00720 Carbon fixation pathways in prokaryotes	0.00169505	19	1.71	Q8CPP4	117	K	Bifunctional protein FolD	folD
map00720 Carbon fixation pathways in prokaryotes	0.00169505	19	1.71	Q8CPP4	20	K	Bifunctional protein FolD	folD
map00720 Carbon fixation pathways in prokaryotes	0.00169505	19	1.71	A0A0H2VI57	7	K	Succinate dehydrogenase iron-sulfur protein subunit	SE_0842
map00720 Carbon fixation pathways in prokaryotes	0.00169505	19	1.71	A0A0H2VI57	146	K	Succinate dehydrogenase iron-sulfur protein subunit	SE_0842
map00720 Carbon fixation pathways in prokaryotes	0.00169505	19	1.71	A0A0H2VFQ9	634	K	Pyruvate carboxylase	SE_0813
map00720 Carbon fixation pathways in prokaryotes	0.00169505	19	1.71	Q8CNR1	172	K	Fumarate hydratase class II	fumC
map00720 Carbon fixation pathways in prokaryotes	0.00169505	19	1.71	Q8CS66	188	K	Acetyl-coenzyme A carboxylase carboxyl transferase subunit beta	accD
map00720 Carbon fixation pathways in prokaryotes	0.00169505	19	1.71	Q8CPC2	391	K	Aconitate hydratase A	acnA
map00720 Carbon fixation pathways in prokaryotes	0.00169505	19	1.71	Q8CPC2	6	K	Aconitate hydratase A	acnA
map00720 Carbon fixation pathways in prokaryotes	0.00169505	19	1.71	Q8CPC2	664	K	Aconitate hydratase A	acnA
map00720 Carbon fixation pathways in prokaryotes	0.00169505	19	1.71	Q8CPC2	416	K	Aconitate hydratase A	acnA
map00720 Carbon fixation pathways in prokaryotes	0.00169505	19	1.71	Q8CPC2	105	K	Aconitate hydratase A	acnA
map00720 Carbon fixation pathways in prokaryotes	0.00169505	19	1.71	Q8CPC2	82	K	Aconitate hydratase A	acnA
map00720 Carbon fixation pathways in prokaryotes	0.00169505	19	1.71	A0A0H2VGL1	34	K	Acetyl-CoA carboxylase biotin carboxyl carrier subunit	SE_1208
map00720 Carbon fixation pathways in prokaryotes	0.00169505	19	1.71	Q8CQ62	210	K	Phosphate acetyltransferase	pta
map00720 Carbon fixation pathways in prokaryotes	0.00169505	19	1.71	A0A0H2VI54	30	K	Phosphoenolpyruvate-protein phosphatase	SE_2160
map00720 Carbon fixation pathways in prokaryotes	0.00169505	19	1.71	A0A0H2VI54	122	K	Phosphoenolpyruvate-protein phosphatase	SE_2160
map00720 Carbon fixation pathways in prokaryotes	0.00169505	19	1.71	A0A0H2VI54	193	K	Phosphoenolpyruvate-protein phosphatase	SE_2160
map00720 Carbon fixation pathways in prokaryotes	0.00169505	19	1.71	A0A0H2VGC2	174	K	Acetyl-CoA carboxylase (Biotin carboxylase subunit) accC	SE_1207
map00720 Carbon fixation pathways in prokaryotes	0.00169505	19	1.71	Q8CPH4	243	K	Succinate--CoA ligase [ADP-forming] subunit alpha	sucD
map00720 Carbon fixation pathways in prokaryotes	0.00169505	19	1.71	Q8CPH4	145	K	Succinate--CoA ligase [ADP-forming] subunit alpha	sucD
map00720 Carbon fixation pathways in prokaryotes	0.00169505	19	1.71	Q8CPH4	144	K	Succinate--CoA ligase [ADP-forming] subunit alpha	sucD
map00720 Carbon fixation pathways in prokaryotes	0.00169505	19	1.71	Q8CPH4	7	K	Succinate--CoA ligase [ADP-forming] subunit alpha	sucD
map00720 Carbon fixation pathways in prokaryotes	0.00169505	19	1.71	Q8CPH4	301	K	Succinate--CoA ligase [ADP-forming] subunit alpha	sucD
map00720 Carbon fixation pathways in prokaryotes	0.00169505	19	1.71	Q8CNX4	163	K	Isocitrate dehydrogenase [NADP]	icd
map00720 Carbon fixation pathways in prokaryotes	0.00169505	19	1.71	Q8CNX4	189	K	Isocitrate dehydrogenase [NADP]	icd
map00720 Carbon fixation pathways in prokaryotes	0.00169505	19	1.71	Q8CNX4	225	K	Isocitrate dehydrogenase [NADP]	icd
map00720 Carbon fixation pathways in prokaryotes	0.00169505	19	1.71	Q8CNX4	132	K	Isocitrate dehydrogenase [NADP]	icd
map00720 Carbon fixation pathways in prokaryotes	0.00169505	19	1.71	Q8CNX4	262	K	Isocitrate dehydrogenase [NADP]	icd
map00720 Carbon fixation pathways in prokaryotes	0.00169505	19	1.71	Q8CNX4	58	K	Isocitrate dehydrogenase [NADP]	icd
map00720 Carbon fixation pathways in prokaryotes	0.00169505	19	1.71	A0A0H2VFY4	405	K	Putative 2-oxoacid ferredoxin oxidoreductase alpha subunit	SE_0967
map00720 Carbon fixation pathways in prokaryotes	0.00169505	19	1.71	Q8CPH5	61	K	Succinate--CoA ligase [ADP-forming] subunit beta	sucC
map00720 Carbon fixation pathways in prokaryotes	0.00169505	19	1.71	Q8CPH5	227	K	Succinate--CoA ligase [ADP-forming] subunit beta	sucC
map00720 Carbon fixation pathways in prokaryotes	0.00169505	19	1.71	Q8CPH5	146	K	Succinate--CoA ligase [ADP-forming] subunit beta	sucC
map00720 Carbon fixation pathways in prokaryotes	0.00169505	19	1.71	Q8CPH5	297	K	Succinate--CoA ligase [ADP-forming] subunit beta	sucC
map00720 Carbon fixation pathways in prokaryotes	0.00169505	19	1.71	Q8CPH5	176	K	Succinate--CoA ligase [ADP-forming] subunit beta	sucC
map00720 Carbon fixation pathways in prokaryotes	0.00169505	19	1.71	Q8CS67	6	K	Acetyl-coenzyme A carboxylase carboxyl transferase subunit alpha	accA
map00720 Carbon fixation pathways in prokaryotes	0.00169505	19	1.71	Q8CS67	14	K	Acetyl-coenzyme A carboxylase carboxyl transferase subunit alpha	accA
map00720 Carbon fixation pathways in prokaryotes	0.00169505	19	1.71	Q8CS60	357	K	Acetate kinase	ackA
map00720 Carbon fixation pathways in prokaryotes	0.00169505	19	1.71	Q8CS60	175	K	Acetate kinase	ackA
map00720 Carbon fixation pathways in prokaryotes	0.00169505	19	1.71	Q8CS60	79	K	Acetate kinase	ackA
map00720 Carbon fixation pathways in prokaryotes	0.00169505	19	1.71	Q8CNV9	368	K	Formate--tetrahydrofolate ligase	fhs
map01053 Biosynthesis of siderophore group nonribosomal peptides	0.410345	1	2.44	A0A0H2VFL9	205	K	Putative menaquinone-specific isochorismate synthase	SE_0743
map01053 Biosynthesis of siderophore group nonribosomal peptides	0.410345	1	2.44	A0A0H2VFL9	33	K	Putative menaquinone-specific isochorismate synthase	SE_0743
map01053 Biosynthesis of siderophore group nonribosomal peptides	0.410345	1	2.44	A0A0H2VFL9	70	K	Putative menaquinone-specific isochorismate synthase	SE_0743
map01053 Biosynthesis of siderophore group nonribosomal peptides	0.410345	1	2.44	A0A0H2VFL9	275	K	Putative menaquinone-specific isochorismate synthase	SE_0743
map04112 Cell cycle - Caulobacter	0.392597	5	1.22	Q8CNY5	190	K	ATP-dependent Clp protease ATP-binding subunit ClpX	clpX
map04112 Cell cycle - Caulobacter	0.392597	5	1.22	Q8CNY5	3	K	ATP-dependent Clp protease ATP-binding subunit ClpX	clpX
map04112 Cell cycle - Caulobacter	0.392597	5	1.22	Q8CQK7	4	K	Chromosomal replication initiator protein DnaA	dnaA
map04112 Cell cycle - Caulobacter	0.392597	5	1.22	Q8CQK7	438	K	Chromosomal replication initiator protein DnaA	dnaA
map04112 Cell cycle - Caulobacter	0.392597	5	1.22	Q8CPK5	72	K	Cell division protein FtsA	ftsA
map04112 Cell cycle - Caulobacter	0.392597	5	1.22	Q8CPK5	57	K	Cell division protein FtsA	ftsA
map04112 Cell cycle - Caulobacter	0.392597	5	1.22	Q8CPK5	411	K	Cell division protein FtsA	ftsA
map04112 Cell cycle - Caulobacter	0.392597	5	1.22	Q8CPK5	115	K	Cell division protein FtsA	ftsA
map04112 Cell cycle - Caulobacter	0.392597	5	1.22	Q8CPK5	460	K	Cell division protein FtsA	ftsA
map04112 Cell cycle - Caulobacter	0.392597	5	1.22	Q8CPK5	135	K	Cell division protein FtsA	ftsA
map04112 Cell cycle - Caulobacter	0.392597	5	1.22	Q8CPK4	373	K	Cell division protein FtsZ	ftsZ
map04112 Cell cycle - Caulobacter	0.392597	5	1.22	Q8CPK4	79	K	Cell division protein FtsZ	ftsZ
map04112 Cell cycle - Caulobacter	0.392597	5	1.22	Q8CMM3	93	K	UDP-N-acetylglucosamine--N-acetylmuramyl-(pentapeptide) pyrophosphoryl-undecaprenol N-acetylglucosamine transferase	murG
map04112 Cell cycle - Caulobacter	0.392597	5	1.22	Q8CMM3	234	K	UDP-N-acetylglucosamine--N-acetylmuramyl-(pentapeptide) pyrophosphoryl-undecaprenol N-acetylglucosamine transferase	murG
map00710 Carbon fixation in photosynthetic organisms	0.00917808	10	1.87	Q8CTD5	217	K	Triosephosphate isomerase	tpiA
map00710 Carbon fixation in photosynthetic organisms	0.00917808	10	1.87	Q8CTD5	151	K	Triosephosphate isomerase	tpiA
map00710 Carbon fixation in photosynthetic organisms	0.00917808	10	1.87	Q8CTD5	150	K	Triosephosphate isomerase	tpiA
map00710 Carbon fixation in photosynthetic organisms	0.00917808	10	1.87	Q8CTD5	113	K	Triosephosphate isomerase	tpiA
map00710 Carbon fixation in photosynthetic organisms	0.00917808	10	1.87	Q8CN27	292	K	"Fructose-1,6-bisphosphatase class 3"	fbp
map00710 Carbon fixation in photosynthetic organisms	0.00917808	10	1.87	Q8CPY5	124	K	Glyceraldehyde-3-phosphate dehydrogenase 1	gapA1
map00710 Carbon fixation in photosynthetic organisms	0.00917808	10	1.87	Q8CPY5	116	K	Glyceraldehyde-3-phosphate dehydrogenase 1	gapA1
map00710 Carbon fixation in photosynthetic organisms	0.00917808	10	1.87	Q8CPY5	219	K	Glyceraldehyde-3-phosphate dehydrogenase 1	gapA1
map00710 Carbon fixation in photosynthetic organisms	0.00917808	10	1.87	Q8CPY5	115	K	Glyceraldehyde-3-phosphate dehydrogenase 1	gapA1
map00710 Carbon fixation in photosynthetic organisms	0.00917808	10	1.87	Q8CNI3	269	K	Fructose-bisphosphate aldolase	fba
map00710 Carbon fixation in photosynthetic organisms	0.00917808	10	1.87	Q8CNI3	252	K	Fructose-bisphosphate aldolase	fba
map00710 Carbon fixation in photosynthetic organisms	0.00917808	10	1.87	Q8CNI3	259	K	Fructose-bisphosphate aldolase	fba
map00710 Carbon fixation in photosynthetic organisms	0.00917808	10	1.87	Q8CNI3	185	K	Fructose-bisphosphate aldolase	fba
map00710 Carbon fixation in photosynthetic organisms	0.00917808	10	1.87	Q8CNI3	7	K	Fructose-bisphosphate aldolase	fba
map00710 Carbon fixation in photosynthetic organisms	0.00917808	10	1.87	Q8CTD6	27	K	Phosphoglycerate kinase	pgk
map00710 Carbon fixation in photosynthetic organisms	0.00917808	10	1.87	Q8CTD6	272	K	Phosphoglycerate kinase	pgk
map00710 Carbon fixation in photosynthetic organisms	0.00917808	10	1.87	Q8CTD6	130	K	Phosphoglycerate kinase	pgk
map00710 Carbon fixation in photosynthetic organisms	0.00917808	10	1.87	Q8CTD6	206	K	Phosphoglycerate kinase	pgk
map00710 Carbon fixation in photosynthetic organisms	0.00917808	10	1.87	Q8CTD6	75	K	Phosphoglycerate kinase	pgk
map00710 Carbon fixation in photosynthetic organisms	0.00917808	10	1.87	Q8CTD6	4	K	Phosphoglycerate kinase	pgk
map00710 Carbon fixation in photosynthetic organisms	0.00917808	10	1.87	Q8CTD6	99	K	Phosphoglycerate kinase	pgk
map00710 Carbon fixation in photosynthetic organisms	0.00917808	10	1.87	Q8CTD6	126	K	Phosphoglycerate kinase	pgk
map00710 Carbon fixation in photosynthetic organisms	0.00917808	10	1.87	Q8CMY5	104	K	Fructose-bisphosphate aldolase class 1	fda
map00710 Carbon fixation in photosynthetic organisms	0.00917808	10	1.87	Q8CMY5	251	K	Fructose-bisphosphate aldolase class 1	fda
map00710 Carbon fixation in photosynthetic organisms	0.00917808	10	1.87	Q8CMY5	190	K	Fructose-bisphosphate aldolase class 1	fda
map00710 Carbon fixation in photosynthetic organisms	0.00917808	10	1.87	Q8CMY5	185	K	Fructose-bisphosphate aldolase class 1	fda
map00710 Carbon fixation in photosynthetic organisms	0.00917808	10	1.87	Q8CMY5	3	K	Fructose-bisphosphate aldolase class 1	fda
map00710 Carbon fixation in photosynthetic organisms	0.00917808	10	1.87	Q8CMY5	138	K	Fructose-bisphosphate aldolase class 1	fda
map00710 Carbon fixation in photosynthetic organisms	0.00917808	10	1.87	Q8CMY5	295	K	Fructose-bisphosphate aldolase class 1	fda
map00710 Carbon fixation in photosynthetic organisms	0.00917808	10	1.87	Q8CMY5	8	K	Fructose-bisphosphate aldolase class 1	fda
map00710 Carbon fixation in photosynthetic organisms	0.00917808	10	1.87	Q8CMY5	101	K	Fructose-bisphosphate aldolase class 1	fda
map00710 Carbon fixation in photosynthetic organisms	0.00917808	10	1.87	Q8CMY5	117	K	Fructose-bisphosphate aldolase class 1	fda
map00710 Carbon fixation in photosynthetic organisms	0.00917808	10	1.87	Q8CMY5	223	K	Fructose-bisphosphate aldolase class 1	fda
map00710 Carbon fixation in photosynthetic organisms	0.00917808	10	1.87	Q8CS25	513	K	Phosphoenolpyruvate carboxykinase [ATP]	pckA
map00710 Carbon fixation in photosynthetic organisms	0.00917808	10	1.87	Q8CS25	54	K	Phosphoenolpyruvate carboxykinase [ATP]	pckA
map00710 Carbon fixation in photosynthetic organisms	0.00917808	10	1.87	Q8CPC7	283	K	Transketolase	tkt
map00710 Carbon fixation in photosynthetic organisms	0.00917808	10	1.87	Q8CPC7	396	K	Transketolase	tkt
map00710 Carbon fixation in photosynthetic organisms	0.00917808	10	1.87	Q8CPC7	5	K	Transketolase	tkt
map00710 Carbon fixation in photosynthetic organisms	0.00917808	10	1.87	Q8CNY0	194	K	Glyceraldehyde-3-phosphate dehydrogenase 2	gapA2
map00710 Carbon fixation in photosynthetic organisms	0.00917808	10	1.87	Q8CNY0	57	K	Glyceraldehyde-3-phosphate dehydrogenase 2	gapA2
map00710 Carbon fixation in photosynthetic organisms	0.00917808	10	1.87	A0A0H2VI54	30	K	Phosphoenolpyruvate-protein phosphatase	SE_2160
map00710 Carbon fixation in photosynthetic organisms	0.00917808	10	1.87	A0A0H2VI54	122	K	Phosphoenolpyruvate-protein phosphatase	SE_2160
map00710 Carbon fixation in photosynthetic organisms	0.00917808	10	1.87	A0A0H2VI54	193	K	Phosphoenolpyruvate-protein phosphatase	SE_2160
map03060 Protein export	0.766087	6	0.86	A0A0H2VIW2	90	K	Signal peptidase I	SE_2397
map03060 Protein export	0.766087	6	0.86	A0A0H2VFF5	163	K	Signal peptidase I	SE_0662
map03060 Protein export	0.766087	6	0.86	A0A0H2VFF5	190	K	Signal peptidase I	SE_0662
map03060 Protein export	0.766087	6	0.86	A0A0H2VFF5	71	K	Signal peptidase I	SE_0662
map03060 Protein export	0.766087	6	0.86	Q8CPZ2	468	K	Protein translocase subunit SecA 1	secA1
map03060 Protein export	0.766087	6	0.86	Q8CPZ2	809	K	Protein translocase subunit SecA 1	secA1
map03060 Protein export	0.766087	6	0.86	Q8CPZ2	838	K	Protein translocase subunit SecA 1	secA1
map03060 Protein export	0.766087	6	0.86	Q8CPZ2	58	K	Protein translocase subunit SecA 1	secA1
map03060 Protein export	0.766087	6	0.86	A0A0H2VGW9	443	K	Protein-export membrane protein SecDF	SE_1320
map03060 Protein export	0.766087	6	0.86	Q8CMK8	124	K	Membrane protein insertase YidC 1	yidC1
map03060 Protein export	0.766087	6	0.86	A0A0H2VI90	269	K	Signal recognition particle protein	ffh
map03060 Protein export	0.766087	6	0.86	A0A0H2VI90	22	K	Signal recognition particle protein	ffh
map03060 Protein export	0.766087	6	0.86	A0A0H2VI90	424	K	Signal recognition particle protein	ffh
map00340 Histidine metabolism	0.851662	4	0.75	Q8CNI5	292	K	Putative aldehyde dehydrogenase SE_1720	SE_1720
map00340 Histidine metabolism	0.851662	4	0.75	Q8CNI5	351	K	Putative aldehyde dehydrogenase SE_1720	SE_1720
map00340 Histidine metabolism	0.851662	4	0.75	Q8CNI5	270	K	Putative aldehyde dehydrogenase SE_1720	SE_1720
map00340 Histidine metabolism	0.851662	4	0.75	Q8CN24	354	K	Putative aldehyde dehydrogenase AldA	aldA
map00340 Histidine metabolism	0.851662	4	0.75	Q8CN24	312	K	Putative aldehyde dehydrogenase AldA	aldA
map00340 Histidine metabolism	0.851662	4	0.75	Q8CN24	463	K	Putative aldehyde dehydrogenase AldA	aldA
map00340 Histidine metabolism	0.851662	4	0.75	Q8CN24	473	K	Putative aldehyde dehydrogenase AldA	aldA
map00340 Histidine metabolism	0.851662	4	0.75	A0A0H2VJG4	257	K	Aldehyde dehydrogenase	SE_1603
map00340 Histidine metabolism	0.851662	4	0.75	A0A0H2VES5	654	K	Putative NADH-dependent flavin oxidoreductase	SE_0195
map05111 Biofilm formation - Vibrio cholerae	0.783364	2	0.81	Q8CNI0	144	K	S-ribosylhomocysteine lyase	luxS
map05111 Biofilm formation - Vibrio cholerae	0.783364	2	0.81	Q8CP79	70	K	PTS system glucose-specific EIIA component	crr
map05111 Biofilm formation - Vibrio cholerae	0.783364	2	0.81	Q8CP79	14	K	PTS system glucose-specific EIIA component	crr
map00230 Purine metabolism	0.248618	22	1.14	Q8CNH9	185	K	Phosphopentomutase	deoB
map00230 Purine metabolism	0.248618	22	1.14	Q8CNH9	218	K	Phosphopentomutase	deoB
map00230 Purine metabolism	0.248618	22	1.14	Q8CN38	413	K	Phosphoglucomutase	pgcA
map00230 Purine metabolism	0.248618	22	1.14	Q8CN38	44	K	Phosphoglucomutase	pgcA
map00230 Purine metabolism	0.248618	22	1.14	Q8CND0	77	K	Urease subunit beta	ureB
map00230 Purine metabolism	0.248618	22	1.14	Q8CTX1	25	K	Carbamate kinase 1	arcC1
map00230 Purine metabolism	0.248618	22	1.14	Q8CTX1	210	K	Carbamate kinase 1	arcC1
map00230 Purine metabolism	0.248618	22	1.14	Q8CTX1	262	K	Carbamate kinase 1	arcC1
map00230 Purine metabolism	0.248618	22	1.14	A0A0H2VIM4	602	K	Anaerobic ribonucleoside-triphosphate reductase	SE_2172
map00230 Purine metabolism	0.248618	22	1.14	A0A0H2VIM4	211	K	Anaerobic ribonucleoside-triphosphate reductase	SE_2172
map00230 Purine metabolism	0.248618	22	1.14	Q8CSY5	92	K	Non-canonical purine NTP pyrophosphatase	SE_0844
map00230 Purine metabolism	0.248618	22	1.14	A0A0H2VKA6	195	K	GTP-pyrophosphokinase	SE_2052
map00230 Purine metabolism	0.248618	22	1.14	Q8CMQ7	453	K	Inosine-5'-monophosphate dehydrogenase	guaB
map00230 Purine metabolism	0.248618	22	1.14	Q8CMQ7	413	K	Inosine-5'-monophosphate dehydrogenase	guaB
map00230 Purine metabolism	0.248618	22	1.14	Q8CMQ7	409	K	Inosine-5'-monophosphate dehydrogenase	guaB
map00230 Purine metabolism	0.248618	22	1.14	Q8CMQ7	264	K	Inosine-5'-monophosphate dehydrogenase	guaB
map00230 Purine metabolism	0.248618	22	1.14	Q8CSI0	9	K	Nucleoside diphosphate kinase	ndk
map00230 Purine metabolism	0.248618	22	1.14	Q8CSI0	140	K	Nucleoside diphosphate kinase	ndk
map00230 Purine metabolism	0.248618	22	1.14	A0A0H2VHG9	70	K	Inosine-adenosine-guanosine-nucleoside hydrolase	SE_1857
map00230 Purine metabolism	0.248618	22	1.14	A0A0H2VHG9	267	K	Inosine-adenosine-guanosine-nucleoside hydrolase	SE_1857
map00230 Purine metabolism	0.248618	22	1.14	Q8CQU7	188	K	Ribose-phosphate pyrophosphokinase	prs
map00230 Purine metabolism	0.248618	22	1.14	Q8CQU7	202	K	Ribose-phosphate pyrophosphokinase	prs
map00230 Purine metabolism	0.248618	22	1.14	Q8CS69	563	K	Pyruvate kinase	pyk
map00230 Purine metabolism	0.248618	22	1.14	Q8CS69	173	K	Pyruvate kinase	pyk
map00230 Purine metabolism	0.248618	22	1.14	Q8CS69	156	K	Pyruvate kinase	pyk
map00230 Purine metabolism	0.248618	22	1.14	Q8CS69	390	K	Pyruvate kinase	pyk
map00230 Purine metabolism	0.248618	22	1.14	Q8CS69	139	K	Pyruvate kinase	pyk
map00230 Purine metabolism	0.248618	22	1.14	Q8CS69	341	K	Pyruvate kinase	pyk
map00230 Purine metabolism	0.248618	22	1.14	Q8CRT6	268	K	Adenylosuccinate lyase	purB
map00230 Purine metabolism	0.248618	22	1.14	Q8CRT6	115	K	Adenylosuccinate lyase	purB
map00230 Purine metabolism	0.248618	22	1.14	Q8CRI0	22	K	Adenylate kinase	adk
map00230 Purine metabolism	0.248618	22	1.14	Q8CRI0	40	K	Adenylate kinase	adk
map00230 Purine metabolism	0.248618	22	1.14	Q8CRI0	23	K	Adenylate kinase	adk
map00230 Purine metabolism	0.248618	22	1.14	Q8CU42	271	K	Carbamate kinase 2	arcC2
map00230 Purine metabolism	0.248618	22	1.14	Q8CU42	138	K	Carbamate kinase 2	arcC2
map00230 Purine metabolism	0.248618	22	1.14	Q8CU42	143	K	Carbamate kinase 2	arcC2
map00230 Purine metabolism	0.248618	22	1.14	Q8CU42	308	K	Carbamate kinase 2	arcC2
map00230 Purine metabolism	0.248618	22	1.14	Q8CU42	265	K	Carbamate kinase 2	arcC2
map00230 Purine metabolism	0.248618	22	1.14	Q8CU42	141	K	Carbamate kinase 2	arcC2
map00230 Purine metabolism	0.248618	22	1.14	Q8CU42	256	K	Carbamate kinase 2	arcC2
map00230 Purine metabolism	0.248618	22	1.14	Q8CU42	255	K	Carbamate kinase 2	arcC2
map00230 Purine metabolism	0.248618	22	1.14	A0A0H2VF65	8	K	Ribonucleoside-diphosphate reductase	SE_0513
map00230 Purine metabolism	0.248618	22	1.14	Q8CQK1	197	K	Adenylosuccinate synthetase	purA
map00230 Purine metabolism	0.248618	22	1.14	Q8CQK1	153	K	Adenylosuccinate synthetase	purA
map00230 Purine metabolism	0.248618	22	1.14	A0A0H2VFR3	159	K	GTP pyrophosphokinase	SE_0695
map00230 Purine metabolism	0.248618	22	1.14	A0A0H2VFR3	46	K	GTP pyrophosphokinase	SE_0695
map00230 Purine metabolism	0.248618	22	1.14	Q8CS95	109	K	Adenine phosphoribosyltransferase	apt
map00230 Purine metabolism	0.248618	22	1.14	Q8CS95	47	K	Adenine phosphoribosyltransferase	apt
map00230 Purine metabolism	0.248618	22	1.14	Q8CPC9	272	K	GMP reductase	guaC
map00230 Purine metabolism	0.248618	22	1.14	Q8CPC9	251	K	GMP reductase	guaC
map00230 Purine metabolism	0.248618	22	1.14	P0C0M9	190	K	Guanylate kinase	gmk
map00230 Purine metabolism	0.248618	22	1.14	A0A0H2VGU7	220	K	Ribonucleoside-diphosphate reductase minor subunit	SE_0514
map00220 Arginine biosynthesis	0.273667	10	1.22	Q8CQG5	21	K	Arginine deiminase 1	arcA1
map00220 Arginine biosynthesis	0.273667	10	1.22	Q8CQG5	198	K	Arginine deiminase 1	arcA1
map00220 Arginine biosynthesis	0.273667	10	1.22	Q8CQG5	97	K	Arginine deiminase 1	arcA1
map00220 Arginine biosynthesis	0.273667	10	1.22	Q8CQG5	249	K	Arginine deiminase 1	arcA1
map00220 Arginine biosynthesis	0.273667	10	1.22	Q8CQG5	107	K	Arginine deiminase 1	arcA1
map00220 Arginine biosynthesis	0.273667	10	1.22	Q8CQG5	14	K	Arginine deiminase 1	arcA1
map00220 Arginine biosynthesis	0.273667	10	1.22	Q8CQG5	308	K	Arginine deiminase 1	arcA1
map00220 Arginine biosynthesis	0.273667	10	1.22	Q8CQG5	200	K	Arginine deiminase 1	arcA1
map00220 Arginine biosynthesis	0.273667	10	1.22	Q8CQG5	256	K	Arginine deiminase 1	arcA1
map00220 Arginine biosynthesis	0.273667	10	1.22	Q8CQG5	16	K	Arginine deiminase 1	arcA1
map00220 Arginine biosynthesis	0.273667	10	1.22	Q8CQG5	257	K	Arginine deiminase 1	arcA1
map00220 Arginine biosynthesis	0.273667	10	1.22	Q8CQG5	96	K	Arginine deiminase 1	arcA1
map00220 Arginine biosynthesis	0.273667	10	1.22	Q8CQG5	242	K	Arginine deiminase 1	arcA1
map00220 Arginine biosynthesis	0.273667	10	1.22	Q8CQG5	55	K	Arginine deiminase 1	arcA1
map00220 Arginine biosynthesis	0.273667	10	1.22	Q8CU42	271	K	Carbamate kinase 2	arcC2
map00220 Arginine biosynthesis	0.273667	10	1.22	Q8CU42	138	K	Carbamate kinase 2	arcC2
map00220 Arginine biosynthesis	0.273667	10	1.22	Q8CU42	143	K	Carbamate kinase 2	arcC2
map00220 Arginine biosynthesis	0.273667	10	1.22	Q8CU42	308	K	Carbamate kinase 2	arcC2
map00220 Arginine biosynthesis	0.273667	10	1.22	Q8CU42	265	K	Carbamate kinase 2	arcC2
map00220 Arginine biosynthesis	0.273667	10	1.22	Q8CU42	141	K	Carbamate kinase 2	arcC2
map00220 Arginine biosynthesis	0.273667	10	1.22	Q8CU42	256	K	Carbamate kinase 2	arcC2
map00220 Arginine biosynthesis	0.273667	10	1.22	Q8CU42	255	K	Carbamate kinase 2	arcC2
map00220 Arginine biosynthesis	0.273667	10	1.22	P0C0N1	251	K	Ornithine carbamoyltransferase	argF
map00220 Arginine biosynthesis	0.273667	10	1.22	P0C0N1	34	K	Ornithine carbamoyltransferase	argF
map00220 Arginine biosynthesis	0.273667	10	1.22	P0C0N1	40	K	Ornithine carbamoyltransferase	argF
map00220 Arginine biosynthesis	0.273667	10	1.22	P0C0N1	44	K	Ornithine carbamoyltransferase	argF
map00220 Arginine biosynthesis	0.273667	10	1.22	P0C0N1	54	K	Ornithine carbamoyltransferase	argF
map00220 Arginine biosynthesis	0.273667	10	1.22	Q8CSR8	13	K	Glutamine synthetase	glnA
map00220 Arginine biosynthesis	0.273667	10	1.22	Q8CSR8	226	K	Glutamine synthetase	glnA
map00220 Arginine biosynthesis	0.273667	10	1.22	A0A0H2VH55	351	K	Nitric oxide synthase oxygenase	SE_1598
map00220 Arginine biosynthesis	0.273667	10	1.22	Q8CND0	77	K	Urease subunit beta	ureB
map00220 Arginine biosynthesis	0.273667	10	1.22	Q8CU41	248	K	"Ornithine carbamoyltransferase 1, catabolic"	arcB1
map00220 Arginine biosynthesis	0.273667	10	1.22	Q8CU41	323	K	"Ornithine carbamoyltransferase 1, catabolic"	arcB1
map00220 Arginine biosynthesis	0.273667	10	1.22	Q8CU41	91	K	"Ornithine carbamoyltransferase 1, catabolic"	arcB1
map00220 Arginine biosynthesis	0.273667	10	1.22	Q8CU41	42	K	"Ornithine carbamoyltransferase 1, catabolic"	arcB1
map00220 Arginine biosynthesis	0.273667	10	1.22	Q8CU41	34	K	"Ornithine carbamoyltransferase 1, catabolic"	arcB1
map00220 Arginine biosynthesis	0.273667	10	1.22	Q8CU41	46	K	"Ornithine carbamoyltransferase 1, catabolic"	arcB1
map00220 Arginine biosynthesis	0.273667	10	1.22	Q8CU41	151	K	"Ornithine carbamoyltransferase 1, catabolic"	arcB1
map00220 Arginine biosynthesis	0.273667	10	1.22	Q8CU41	31	K	"Ornithine carbamoyltransferase 1, catabolic"	arcB1
map00220 Arginine biosynthesis	0.273667	10	1.22	Q8CU41	54	K	"Ornithine carbamoyltransferase 1, catabolic"	arcB1
map00220 Arginine biosynthesis	0.273667	10	1.22	Q8CU41	150	K	"Ornithine carbamoyltransferase 1, catabolic"	arcB1
map00220 Arginine biosynthesis	0.273667	10	1.22	Q8CMW2	40	K	"Ornithine carbamoyltransferase 2, catabolic"	arcB2
map00220 Arginine biosynthesis	0.273667	10	1.22	Q8CTX1	25	K	Carbamate kinase 1	arcC1
map00220 Arginine biosynthesis	0.273667	10	1.22	Q8CTX1	210	K	Carbamate kinase 1	arcC1
map00220 Arginine biosynthesis	0.273667	10	1.22	Q8CTX1	262	K	Carbamate kinase 1	arcC1
map00220 Arginine biosynthesis	0.273667	10	1.22	Q8CMW1	198	K	Arginine deiminase 2	arcA2
map00220 Arginine biosynthesis	0.273667	10	1.22	Q8CMW1	97	K	Arginine deiminase 2	arcA2
map00220 Arginine biosynthesis	0.273667	10	1.22	Q8CMW1	108	K	Arginine deiminase 2	arcA2
map00220 Arginine biosynthesis	0.273667	10	1.22	Q8CMW1	16	K	Arginine deiminase 2	arcA2
map00220 Arginine biosynthesis	0.273667	10	1.22	Q8CMW1	257	K	Arginine deiminase 2	arcA2
map00220 Arginine biosynthesis	0.273667	10	1.22	Q8CMW1	249	K	Arginine deiminase 2	arcA2
map02010 ABC transporters	1	8	0.22	A0A0H2VHD1	182	K	Ferrichrome ABC transporter	SE_1768
map02010 ABC transporters	1	8	0.22	A0A0H2VHD1	326	K	Ferrichrome ABC transporter	SE_1768
map02010 ABC transporters	1	8	0.22	A0A0H2VHD1	188	K	Ferrichrome ABC transporter	SE_1768
map02010 ABC transporters	1	8	0.22	A0A0H2VHD1	135	K	Ferrichrome ABC transporter	SE_1768
map02010 ABC transporters	1	8	0.22	A0A0H2VHD1	119	K	Ferrichrome ABC transporter	SE_1768
map02010 ABC transporters	1	8	0.22	A0A0H2VHD1	174	K	Ferrichrome ABC transporter	SE_1768
map02010 ABC transporters	1	8	0.22	A0A0H2VHD1	45	K	Ferrichrome ABC transporter	SE_1768
map02010 ABC transporters	1	8	0.22	A0A0H2VHD1	169	K	Ferrichrome ABC transporter	SE_1768
map02010 ABC transporters	1	8	0.22	A0A0H2VHZ4	252	K	ABC transporter (Periplasmic amino acid-binding protein)	SE_1993
map02010 ABC transporters	1	8	0.22	A0A0H2VHZ4	71	K	ABC transporter (Periplasmic amino acid-binding protein)	SE_1993
map02010 ABC transporters	1	8	0.22	A0A0H2VHZ4	133	K	ABC transporter (Periplasmic amino acid-binding protein)	SE_1993
map02010 ABC transporters	1	8	0.22	A0A0H2VFK4	261	K	Lipoprotein	SE_0602
map02010 ABC transporters	1	8	0.22	A0A0H2VFK4	51	K	Lipoprotein	SE_0602
map02010 ABC transporters	1	8	0.22	A0A0H2VFK4	171	K	Lipoprotein	SE_0602
map02010 ABC transporters	1	8	0.22	A0A0H2VGK1	563	K	ATP-binding cassette transporter A	SE_0418
map02010 ABC transporters	1	8	0.22	A0A0H2VGK1	226	K	ATP-binding cassette transporter A	SE_0418
map02010 ABC transporters	1	8	0.22	A0A0H2VHC8	271	K	Lipoprotein	SE_0405
map02010 ABC transporters	1	8	0.22	Q8CRA9	85	K	Putative hemin transport system permease protein HrtB	hrtB
map02010 ABC transporters	1	8	0.22	A0A0H2VKQ9	240	K	Alkylphosphonate ABC tranporter	SE_2256
map02010 ABC transporters	1	8	0.22	A0A0H2VHG4	63	K	ModA protein	SE_1852
map00730 Thiamine metabolism	0.629704	6	0.97	Q8CNW7	404	K	Probable tRNA sulfurtransferase	thiI
map00730 Thiamine metabolism	0.629704	6	0.97	Q8CRI0	22	K	Adenylate kinase	adk
map00730 Thiamine metabolism	0.629704	6	0.97	Q8CRI0	40	K	Adenylate kinase	adk
map00730 Thiamine metabolism	0.629704	6	0.97	Q8CRI0	23	K	Adenylate kinase	adk
map00730 Thiamine metabolism	0.629704	6	0.97	A0A0H2VH73	203	K	Phosphomethylpyrimidine kinase	SE_1692
map00730 Thiamine metabolism	0.629704	6	0.97	Q8CNK1	194	K	Aminopyrimidine aminohydrolase	tenA
map00730 Thiamine metabolism	0.629704	6	0.97	A0A0H2VI52	300	K	Glycine oxidase	SE_2058
map00730 Thiamine metabolism	0.629704	6	0.97	A0A0H2VIX7	44	K	Iron-sulfur cofactor synthesis protein-like protein	SE_1305
[truncated: 463 more rows]

## Sheet: domain ident
Domain Description	Mapping	Background	All Mapping	All Backgroud	Fold enrichment	Fisher's exact test p value	-log10(P value)	Related Protein
[truncated: 11 more rows]

[truncated: 1 more sheets: ident Domain2Protein]
